# Supplementary material for: Use of machine learning to identify protective factors for death from COVID-19 in the ICU: a retrospective study
Source: PeerJ. 2024 Jun 12;12:e17428. doi: 10.7717/peerj.17428 (PMC11179634; doi:10.7717/peerj.17428)
Supplement: Supplemental Information 1 [file peerj-12-17428-s001.xlsx]

## Sheet: Sheet1
	Index
	SheetCode	Description
	Sheet1	Index
	Sheet2	Identification, Demographic Data, ICU Admission, Diagnoses, ICD-10 and Evolution in the ICU and Hospital
	Sheet3	Comorbidities and Functional Capacity
	Sheet4	SAPS 3 Diagnoses - Reasons for ICU admission
	Sheet5	Complications on the First Day of ICU Admission
	Sheet6	Physiological and Laboratory Data (1h)
	Sheet7	Use of Support and Complications in the ICU
	Sheet8	Secondary Diagnosis

## Sheet: Sheet2
Admission
SuiteName	ProductName	Readmission	HospitalCode	HospitalTypeCode	HospitalTypeName	CountryName	UnitCode	Beds	EpimedCode	MedicalRecord	Age	Sex	Weight	Height cm	BMI	ICU Admission Date	ICU Admission Time	Readmission	Re-admission < 24h	Re-admission < 48h	ICDCode	ICDName	Unit outcome code	Unit Outcome	Unit end date	Time for the end of the Unit	Time from withdrawal to outcome	Reason for delay in transfer	Destination unit code	Target drive name	Decision on palliative care	Palliative care decision date	Length of hospitalization before admission to the ICU	Length of stay in ICU	Palliative care decision time	Type of Treatment	Unit is close	Hospital Admission Date	End result code	Hospital Outcome	Hospital outcome date	destination code	Destination after discharge	Length of hospital stay	Hospital is nearby	HealthInsuranceName	Code of Origin	Origin	Admission type code
Epimed Monitor	General/Mixed	False	H1654	two	Public	Brazil	AGE2182	13	1215e475-d3a2-45f0-ae01-14a673c4130b	1630831	58	M	80	178	25.2	04/01/2020	14:10	False	False	False			A	High	05/20/2020	10:30	1	Uninformed	8	Residence	No		0	49			TRUE	04/01/2020	A	High	05/20/2020	1	Residence	49	TRUE	SUS (Unified Health System)	6	Transfer from another hospital/institution	1
Epimed Monitor	General/Mixed	False	H1654	two	Public	Brazil	AGE2182	13	b048e976-a926-401c-ab78-d6fea8e1e0f5	1630842	39	M	75	180	23.1	04/02/2020	10:00 am	False	False	False			A	High	04/06/2020	15:58	0	Uninformed	1	Ward or room	No		1	4			TRUE	04/01/2020	A	High	04/08/2020	1	Residence	7	TRUE	SUS (Unified Health System)	1	Ward/Room	1
Epimed Monitor	General/Mixed	False	H1654	two	Public	Brazil	AGE2182	13	b244f33f-3218-4c61-90db-03d203bf64ee	1630840	68	F	109	160	42.6	04/05/2020	16:30	False	False	False			A	High	04/07/2020	13:00	3	Uninformed	1	Ward or room	No		4	2			TRUE	04/01/2020	A	High	04/11/2020	1	Residence	10	TRUE		1	Ward/Room	1
Epimed Monitor	General/Mixed	False	H1654	two	Public	Brazil	AGE2182	13	c992f356-eecb-46a9-bd18-b1670af394b1	542774	14	M	25	150	11.1	04/19/2020	21:25	False	False	False											No		0	522			TRUE	04/19/2020							False	SUS (Unified Health System)	2	Emergency	1
Epimed Monitor	General/Mixed	False	H1654	two	Public	Brazil	AGE2182	13	931eca04-f5e2-41fa-8816-4b94dfaa505e	1631566	53	F	65	160	25.4	04/21/2020	11:30	False	False	False			A	High	05/28/2020	14:14	3	Uninformed	8	Residence	No		1	37			TRUE	04/20/2020	A	High	05/28/2020	1	Residence	38	TRUE		1	Ward/Room	1
Epimed Monitor	General/Mixed	False	H1654	two	Public	Brazil	AGE2182	13	121a44e1-af91-4d30-8c39-c408d0a6f875	1632733	0	M	77	163	29	05/20/2020	14:30	False	False	False			A	High	05/25/2020	11:51	2	Uninformed	1	Ward or room	No		0	5			TRUE	05/20/2020	A	High	05/28/2020	1	Residence	8	TRUE	SUS (Unified Health System)	6	Transfer from another hospital/institution	1
Epimed Monitor	General/Mixed	False	H1654	two	Public	Brazil	AGE2182	13	e878e7c0-8c12-414b-b82a-7954e30993f0	257513	81	F	48	165	17.6	05/26/2020	12:31	False	False	False			A	High	05/28/2020	09:42	1	Uninformed	1	Ward or room	No		4	2			TRUE	05/22/2020	A	High	05/29/2020	1	Residence	7	TRUE		1	Ward/Room	1
Epimed Monitor	General/Mixed	False	H1654	two	Public	Brazil	AGE2182	13	c42f6d05-c47a-4b88-91ed-f552b3b74303	1085052	41	M	90	175	29.4	06/05/2020	23:00	False	False	False			A	High	06/16/2020	10:59	2	Uninformed	8	Residence	No		0	11			TRUE	06/05/2020	A	High	06/16/2020	1	Residence	11	TRUE		6	Transfer from another hospital/institution	1
Epimed Monitor	General/Mixed	False	H1654	two	Public	Brazil	AGE2182	13	7adafb3c-d578-44ae-971b-764490341bb5	1633347	86	M				06/09/2020	11:00	False	False	False			D	Death	06/29/2020	02:00		Uninformed	7	Death	Yeah, don't step up	2020-06-20	1	20	11		TRUE	06/08/2020	D	Death	06/29/2020	5	Death	21	TRUE		1	Ward/Room	1
Epimed Monitor	General/Mixed	False	H1654	two	Public	Brazil	AGE2182	13	edd6d4ed-b704-4f36-b853-3d495e31aa55	1633321	53	M				06/10/2020	11:30	False	False	False			A	High	06/17/2020	14:21	5	Waiting for exam results or completion	1	Ward or room	No		2	7			TRUE	06/08/2020	A	High	06/19/2020	1	Residence	11	TRUE		1	Ward/Room	1
Epimed Monitor	General/Mixed	False	H1654	two	Public	Brazil	AGE2182	13	ccb17d2f-df19-4373-8162-a538cb3919f4	1633543	56	M				06/15/2020	09:30	False	False	False			A	High	07/11/2020	17:20	6	Other reasons	1	Ward or room	No		1	26			TRUE	06/14/2020	A	High	07/16/2020	1	Residence	32	TRUE		1	Ward/Room	1
Epimed Monitor	General/Mixed	False	H1654	two	Public	Brazil	AGE2182	13	d9cc5f07-08af-4f53-b227-e024ed5ea702	1633646	70	M	90	180	27.8	06/16/2020	17:40	False	False	False			D	Death	07/15/2020	4:00 pm		Uninformed	7	Death	No		0	29			TRUE	06/16/2020	D	Death	07/15/2020	5	Death	29	TRUE	SUS (Unified Health System)	2	Emergency	1
Epimed Monitor	General/Mixed	False	H1654	two	Public	Brazil	AGE2182	13	1e27aaed-789c-4931-b106-a8c7f6b2c22b	1633747	47	M	75	180	23.1	06/19/2020	17:30	False	False	False			A	High	06/26/2020	13:30	0	Uninformed	1	Ward or room	No		0	7			TRUE	06/19/2020	A	High	06/27/2020	1	Residence	8	TRUE	SUS (Unified Health System)	2	Emergency	1
Epimed Monitor	General/Mixed	False	H1654	two	Public	Brazil	AGE2182	13	f8467d3e-c68c-4a58-a078-fc2fb98c8ce0	1633855	61	M				06/23/2020	11:00	False	False	False			A	High	06/26/2020	15:00	0	Uninformed	1	Ward or room	No		1	3			TRUE	06/22/2020	A	High	06/27/2020	1	Residence	5	TRUE		1	Ward/Room	1
Epimed Monitor	General/Mixed	False	H1654	two	Public	Brazil	AGE2182	13	49caa9de-a02e-44e5-b4dc-e3b8ee15d0c3	1634208	65	M	110	175	35.9	06/27/2020	18:29	False	False	False			D	Death	07/09/2020	20:24		Uninformed	7	Death	No		0	12			TRUE	06/27/2020	D	Death	07/09/2020	5	Death	12	TRUE	SUS (Unified Health System)	6	Transfer from another hospital/institution	1
Epimed Monitor	General/Mixed	False	H1654	two	Public	Brazil	AGE2182	13	7ad54699-6b5f-4792-86d4-44f2031c7f0c	2410416	81	M	80	170	27.7	06/27/2020	21:00	False	False	False			D	Death	07/04/2020	14:15		Uninformed	7	Death	No		0	7			TRUE	06/27/2020	D	Death	07/04/2020	5	Death	7	TRUE	SUS (Unified Health System)	6	Transfer from another hospital/institution	1
Epimed Monitor	General/Mixed	False	H1654	two	Public	Brazil	AGE2182	13	efd2948b-65dd-4634-bc82-173c6e946ec8	1634214	69	M				06/29/2020	12:00 pm	False	False	False			A	High	07/04/2020	12:30	0	Uninformed	1	Ward or room	No		2	5			TRUE	06/27/2020	A	High	07/13/2020	1	Residence	16	TRUE		1	Ward/Room	1
Epimed Monitor	General/Mixed	False	H1654	two	Public	Brazil	AGE2182	13	30510009-a764-4c16-91bf-06420fd2ea0a	1634321	84	M	85	170	29.4	06/29/2020	21:30	False	False	False			A	High	07/08/2020	23:59	0	Uninformed	3	Another hospital ICU/ICU	No		0	9			TRUE	06/29/2020	D	Death	07/09/2020	5	Death	10	TRUE	SUS (Unified Health System)	6	Transfer from another hospital/institution	1
Epimed Monitor	General/Mixed	False	H1654	two	Public	Brazil	AGE2182	13	025c8399-ee8c-482b-ba98-750cac38f554	1582631	77	F	60	160	23.4	06/30/2020	22:00	False	False	False			A	High	07/03/2020	17:30	0	Uninformed	1	Ward or room	No		4	3			TRUE	06/26/2020	A	High	07/16/2020	1	Residence	20	TRUE		1	Ward/Room	1
Epimed Monitor	General/Mixed	False	H1654	two	Public	Brazil	AGE2182	13	8bc5253e-0d3f-41bf-8215-7e028b7ac594	1634128	75	M	75	170	26	07/01/2020	19:30	False	False	False			A	High	07/09/2020	17:04	5	No bed availability in the destination unit	1	Ward or room	No		6	8			TRUE	06/25/2020	A	High	07/10/2020	1	Residence	15	TRUE	SUS (Unified Health System)	1	Ward/Room	1
Epimed Monitor	General/Mixed	False	H1654	two	Public	Brazil	AGE2182	13	b190c835-20f2-4948-9ac4-863961e44772	1634566	71	M	95	165	34.9	07/02/2020	22:00	False	False	False			A	High	07/07/2020	14:00	5	No bed availability in the destination unit	1	Ward or room	No		0	5			TRUE	07/02/2020	A	High	07/10/2020	1	Residence	8	TRUE	SUS (Unified Health System)	6	Transfer from another hospital/institution	1
Epimed Monitor	General/Mixed	False	H1654	two	Public	Brazil	AGE2182	13	a11ec96f-ab1f-49a9-a6ee-4d3ab973ef32	1634663	80	M				07/03/2020	16:30	False	False	False			A	High	07/08/2020	17:52	4	Administrative reasons	3	Another hospital ICU/ICU	No		0	5			TRUE	07/03/2020	D	Death	07/10/2020	5	Death	7	TRUE		6	Transfer from another hospital/institution	1
Epimed Monitor	General/Mixed	False	H1654	two	Public	Brazil	AGE2182	13	261777c1-676b-42df-b6fd-01724805faec	1634844	63	M				07/06/2020	18:10	False	False	False			D	Death	07/26/2020	01:30		Uninformed	7	Death	No		0	20			TRUE	07/06/2020	D	Death	07/26/2020	5	Death	20	TRUE		6	Transfer from another hospital/institution	1
Epimed Monitor	General/Mixed	False	H1654	two	Public	Brazil	AGE2182	13	e59e7617-439a-4b9b-b251-9aa2cf0cd65c	1634285	69	M	65	170	22.5	07/07/2020	09:15	False	False	False			D	Death	07/08/2020	10:00 am		Uninformed	7	Death	No		8	1			TRUE	06/29/2020	D	Death	07/08/2020	5	Death	9	TRUE		1	Ward/Room	1
Epimed Monitor	General/Mixed	False	H1654	two	Public	Brazil	AGE2182	13	f9da3280-d9e0-46f9-9cd1-9e2e709d66b0	1635064	65	M				07/08/2020	21:00	False	False	False			A	High	08/03/2020	18:00	6	Administrative reasons	3	Another hospital ICU/ICU	No		0	26			TRUE	07/08/2020	D	Death	09/03/2020	5	Death	57	TRUE		6	Transfer from another hospital/institution	1
Epimed Monitor	General/Mixed	False	H1654	two	Public	Brazil	AGE2182	13	7f4d7edf-1a48-41c0-b97a-3f973862dfde	1634661	63	M				07/08/2020	22:00	False	False	False			A	High	07/09/2020	20:30		Uninformed	1	Ward or room	No		5	1			TRUE	07/03/2020	A	High	07/17/2020	1	Residence	14	TRUE		1	Ward/Room	1
Epimed Monitor	General/Mixed	False	H1654	two	Public	Brazil	AGE2182	13	bccc8dc6-d5ca-4830-b549-e821aea1bb9f	1635299	66	F	70	160	27.3	07/10/2020	17:41	False	False	False			D	Death	07/14/2020	00:55		Uninformed	7	Death	No		0	4			TRUE	07/10/2020	D	Death	07/14/2020	5	Death	4	TRUE	SUS (Unified Health System)	2	Emergency	1
Epimed Monitor	General/Mixed	False	H1654	two	Public	Brazil	AGE2182	13	6b16c039-9f3c-49b4-8487-7b8cc7f9efe5	1635234	31	M	60	170	20.8	07/11/2020	05:00	False	False	False			A	High	07/15/2020	15:03	6	No bed availability in the destination unit	1	Ward or room	No		1	4			TRUE	07/10/2020	A	High	07/19/2020	1	Residence	9	TRUE		1	Ward/Room	1
Epimed Monitor	General/Mixed	False	H1654	two	Public	Brazil	AGE2182	13	5a6a5a43-e30e-49b7-a2cd-5c8f04e6966d	1635366	40	F				07/12/2020	13:00	False	False	False			A	High	01/08/2020	14:24	4	No bed availability in the destination unit	1	Ward or room	No		0	20			TRUE	07/12/2020	A	High	08/03/2020	1	Residence	22	TRUE		6	Transfer from another hospital/institution	1
Epimed Monitor	General/Mixed	False	H1654	two	Public	Brazil	AGE2182	13	55f3569b-da2a-4f3b-9383-01d97309d06e	1635313	70	M	84	175	27.4	07/12/2020	22:05	False	False	False			A	High	08/12/2020	12:24	2	Uninformed	3	Another hospital ICU/ICU	No		1	31			TRUE	07/11/2020	A	High	09/04/2020	1	Residence	55	TRUE	SUS (Unified Health System)	2	Emergency	1
Epimed Monitor	General/Mixed	False	H1654	two	Public	Brazil	AGE2182	13	64f6913e-ede0-438e-8408-57b6ee12062c	1635365	45	F	96	167	34.4	07/14/2020	11:00	False	False	False			A	High	07/28/2020	14:00	4	No bed availability in the destination unit	1	Ward or room	No		2	14			TRUE	07/12/2020	A	High	07/29/2020	1	Residence	17	TRUE		1	Ward/Room	1
Epimed Monitor	General/Mixed	False	H1654	two	Public	Brazil	AGE2182	13	9633bcde-df90-42c6-9b90-3fada853ea16	125106	62	M	110	170	38.1	07/17/2020	22:30	False	False	False			D	Death	08/09/2020	09:30		Uninformed	7	Death	No		0	23			TRUE	07/17/2020	D	Death	08/09/2020	5	Death	23	TRUE	SUS (Unified Health System)	1	Ward/Room	1
Epimed Monitor	General/Mixed	False	H1654	two	Public	Brazil	AGE2182	13	5ff25b53-aeea-4c8b-bb29-116026024792	1635764	77	M	85	160	33.2	07/20/2020	09:23	False	False	False			D	Death	07/29/2020	13:30		Uninformed	7	Death	No		4	9			TRUE	07/16/2020	D	Death	07/29/2020	5	Death	13	TRUE	SUS (Unified Health System)	1	Ward/Room	1
Epimed Monitor	General/Mixed	False	H1654	two	Public	Brazil	AGE2182	13	869d0cfb-31c7-41ae-9314-54c97624ef81	1636029	75	M				07/20/2020	17:00	False	False	False			A	High	07/28/2020	14:30	4	Uninformed	1	Ward or room	No		0	8			TRUE	07/20/2020	A	High	07/31/2020	1	Residence	11	TRUE		1	Ward/Room	1
Epimed Monitor	General/Mixed	False	H1654	two	Public	Brazil	AGE2182	13	ddac4209-22fb-440d-b038-1f924c8a36e5	320737	69	F				07/20/2020	18:59	False	False	False			A	High	07/25/2020	10:30	1	Uninformed	1	Ward or room	No		0	5			TRUE	07/20/2020	A	High	07/26/2020	1	Residence	6	TRUE		6	Transfer from another hospital/institution	1
Epimed Monitor	General/Mixed	False	H1654	two	Public	Brazil	AGE2182	13	3f43d4ca-09ce-41c3-a18d-6e09af58ad22	710124	65	M				07/21/2020	19:00	False	False	False			A	High	07/24/2020	15:38	3	Uninformed	1	Ward or room	No		3	3			TRUE	07/18/2020	A	High	07/29/2020	1	Residence	11	TRUE		1	Ward/Room	1
Epimed Monitor	General/Mixed	False	H1654	two	Public	Brazil	AGE2182	13	81d7a3f4-5483-41bf-ad09-d2bda6502a9f	1089819	38	F	170	170	58.8	07/25/2020	19:45	False	False	False			A	High	07/08/2020	14:00	6	No bed availability in the destination unit	3	Another hospital ICU/ICU	No		0	13			TRUE	07/25/2020	A	High	08/24/2020	3	Another hospital	30	TRUE	SUS (Unified Health System)	6	Transfer from another hospital/institution	1
Epimed Monitor	General/Mixed	False	H1654	two	Public	Brazil	AGE2182	13	a05addfa-3127-4821-b1bd-13ae12b3fa16	713111	60	F	60	160	23.4	07/27/2020	00:20	False	False	False			A	High	08/10/2020	11:30	0	Uninformed	1	Ward or room	No		0	14			TRUE	07/27/2020	A	High	08/11/2020	1	Residence	15	TRUE	SUS (Unified Health System)	6	Transfer from another hospital/institution	1
Epimed Monitor	General/Mixed	False	H1654	two	Public	Brazil	AGE2182	13	4e94c49d-fe83-453d-a907-59a5be11f2d8	383279	75	M	80	175	26.1	07/27/2020	23:53	False	False	False			D	Death	07/28/2020	00:53		Uninformed	7	Death	No		0	1			TRUE	07/27/2020	D	Death	07/28/2020	5	Death	1	TRUE		6	Transfer from another hospital/institution	1
Epimed Monitor	General/Mixed	False	H1654	two	Public	Brazil	AGE2182	13	523602bf-7884-44ff-a051-a83c12b4f5e8	1636831	48	F	86	178	27.1	07/31/2020	13:40	False	False	False			A	High	08/10/2020	12:00 pm	3	Uninformed	1	Ward or room	No		2	10			TRUE	07/29/2020	A	High	08/13/2020	1	Residence	15	TRUE		1	Ward/Room	1
Epimed Monitor	General/Mixed	False	H1654	two	Public	Brazil	AGE2182	13	a458eb9b-54af-4fe1-a97f-87e5956e37d1	1090321	73	M				07/31/2020	23:10	False	False	False			A	High	08/10/2020	15:20	0	Uninformed	4	Another hospital	No		0	10			TRUE	07/31/2020	A	High	08/10/2020	3	Another hospital	10	TRUE	SUS (Unified Health System)	6	Transfer from another hospital/institution	1
Epimed Monitor	General/Mixed	False	H1654	two	Public	Brazil	AGE2182	13	fed831a6-4a70-46e4-8e7d-3ee066422cc4	224806	95	M	70	175	22.9	01/08/2020	22:30	False	False	False			A	High	02/08/2020	21:00	2	Uninformed	3	Another hospital ICU/ICU	No		0	1			TRUE	01/08/2020	A	High	08/11/2020	1	Residence	10	TRUE	SUS (Unified Health System)	2	Emergency	1
Epimed Monitor	General/Mixed	False	H1654	two	Public	Brazil	AGE2182	13	123754c4-b874-4b07-9ded-8b21c9d3ad9a	282450	71	M	65	170	22.5	02/08/2020	23:30	False	False	False			A	High	07/08/2020	14:54	4	Other reasons			No		0	5			TRUE	02/08/2020	A	High	08/08/2020	1	Residence	6	TRUE	SUS (Unified Health System)	1	Ward/Room	1
Epimed Monitor	General/Mixed	False	H1654	two	Public	Brazil	AGE2182	13	daecd42b-5049-48ce-948e-ea8cb358227b	219767	73	M				08/03/2020	21:40	False	False	False			D	Death	08/20/2020	15:44		Uninformed	7	Death	No		4	17			TRUE	07/30/2020	D	Death	08/20/2020	5	Death	21	TRUE	SUS (Unified Health System)	1	Ward/Room	1
Epimed Monitor	General/Mixed	False	H1654	two	Public	Brazil	AGE2182	13	1c1e9824-b72c-4eab-a3bc-2b94f0881b08	1367159	78	M	80	186	23.1	08/04/2020	14:30	False	False	False			D	Death	07/08/2020	03:30		Uninformed	7	Death	No		4	3			TRUE	07/31/2020	D	Death	07/08/2020	5	Death	7	TRUE		1	Ward/Room	1
Epimed Monitor	General/Mixed	False	H1654	two	Public	Brazil	AGE2182	13	01ca5e88-1cb1-4b84-b768-7b1b0dbacc9b	90650	77	M	70	175	22.9	05/08/2020	23:30	False	False	False			D	Death	08/15/2020	03:40		Uninformed	7	Death	No		2	10			TRUE	08/03/2020	D	Death	08/15/2020	5	Death	12	TRUE	SUS (Unified Health System)	1	Ward/Room	1
Epimed Monitor	General/Mixed	False	H1654	two	Public	Brazil	AGE2182	13	8384526d-193d-44be-8aa2-1797a508e8ef	1637839	51	M	60	165	22	08/11/2020	07:57	False	False	False			D	Death	09/10/2020	14:30		Uninformed	7	Death	No		3	30			TRUE	08/08/2020	D	Death	09/10/2020	5	Death	33	TRUE	SUS (Unified Health System)	1	Ward/Room	1
Epimed Monitor	General/Mixed	False	H1654	two	Public	Brazil	AGE2182	13	1236551c-f657-4fed-8abc-d772c04b0079	1637894	75	M	65	160	25.4	08/11/2020	11:31	False	False	False			D	Death	08/30/2020	07:51		Uninformed	7	Death	No		2	19			TRUE	08/09/2020	D	Death	08/30/2020	5	Death	21	TRUE	SUS (Unified Health System)	1	Ward/Room	1
Epimed Monitor	General/Mixed	False	H1654	two	Public	Brazil	AGE2182	13	bcc39dc0-56a1-4f1c-9128-d83a084cdaad	1085149	75	F	85	175	27.8	08/11/2020	17:50	False	False	False			D	Death	08/22/2020	19:34		Uninformed	7	Death	No		0	11			TRUE	08/11/2020	D	Death	08/22/2020	5	Death	11	TRUE	SUS (Unified Health System)	6	Transfer from another hospital/institution	1
Epimed Monitor	General/Mixed	False	H1654	two	Public	Brazil	AGE2182	13	4b133dc5-2c05-4730-921f-c7abe1dcf2d0	1638039	45	M	75	180	23.1	08/11/2020	21:30	False	False	False			A	High	08/17/2020	11:47	1	Uninformed	1	Ward or room	No		1	6			TRUE	08/10/2020	A	High	08/20/2020	1	Residence	10	TRUE	SUS (Unified Health System)	1	Ward/Room	1
Epimed Monitor	General/Mixed	False	H1654	two	Public	Brazil	AGE2182	13	3f5c0009-c5d8-48a7-9a71-4af1f11cac8d	1638204	73	M	75	180	23.1	08/14/2020	11:02	False	False	False			A	High	08/15/2020	12:40	2	Uninformed	3	Another hospital ICU/ICU	No		2	1			TRUE	08/12/2020	A	High	08/18/2020	1	Residence	6	TRUE	SUS (Unified Health System)	1	Ward/Room	1
Epimed Monitor	General/Mixed	False	H1654	two	Public	Brazil	AGE2182	13	c928d39f-492c-40d5-906e-d9e59d283955	1638499	88	F	85	165	31.2	08/14/2020	14:45	False	False	False			D	Death	08/21/2020	23:30		Uninformed	7	Death	No		0	7			TRUE	08/14/2020	D	Death	08/21/2020	5	Death	7	TRUE		6	Transfer from another hospital/institution	1
Epimed Monitor	General/Mixed	False	H1654	two	Public	Brazil	AGE2182	13	2bfdae4e-a374-43c4-b969-f75a2d4ddabf	1638461	70	M	85	160	33.2	08/17/2020	18:41	False	False	False			D	Death	08/29/2020	18:32		Uninformed	7	Death	No		3	12			TRUE	08/14/2020	D	Death	08/29/2020	5	Death	15	TRUE	SUS (Unified Health System)	1	Ward/Room	1
Epimed Monitor	General/Mixed	False	H1654	two	Public	Brazil	AGE2182	13	f7ba238c-4e83-4609-b13d-d460bc39f3a3	1638535	71	M	80	160	31.2	08/18/2020	11:44	False	False	False			A	High	08/20/2020	10:08	2	Uninformed	1	Ward or room	No		3	2			TRUE	08/15/2020	A	High	08/27/2020	1	Residence	12	TRUE	SUS (Unified Health System)	1	Ward/Room	1
Epimed Monitor	General/Mixed	False	H1654	two	Public	Brazil	AGE2182	13	2624e68b-d455-49d5-b9ce-f2203e380bf0	1638703	65	M	90	178	28.4	08/20/2020	8 o'clock	False	False	False			A	High	08/21/2020	14:37	2	Uninformed	4	Another hospital	No		3	1			TRUE	08/17/2020	A	High	08/21/2020	3	Another hospital	4	TRUE		1	Ward/Room	1
Epimed Monitor	General/Mixed	False	H1654	two	Public	Brazil	AGE2182	13	963c341b-7f46-4882-811b-09ceba581d81	1638701	89	M	80	176	25.8	08/20/2020	14:00	False	False	False			D	Death	08/27/2020	04:20		Uninformed	7	Death	No		3	7			TRUE	08/17/2020	D	Death	08/27/2020	5	Death	10	TRUE		1	Ward/Room	1
Epimed Monitor	General/Mixed	False	H1654	two	Public	Brazil	AGE2182	13	1c66440c-0c68-4196-a2a2-29c4f4c957c5	1638204	73	M	70	170	24.2	08/21/2020	16:20	TRUE	False	False			D	Death	08/23/2020	09:50		Uninformed	7	Death	No		0	2			TRUE	08/21/2020	D	Death	08/23/2020	5	Death	2	TRUE	SUS (Unified Health System)	6	Transfer from another hospital/institution	1
Epimed Monitor	General/Mixed	False	H1654	two	Public	Brazil	AGE2182	13	7760825b-5b46-4aef-834d-c245d1a09c51	533885	86	M				08/21/2020	16:20	False	False	False			D	Death	10/07/2020	11:00		Uninformed	7	Death	No		0	47			TRUE	08/21/2020	D	Death	10/07/2020	5	Death	47	TRUE	SUS (Unified Health System)	6	Transfer from another hospital/institution	1
Epimed Monitor	General/Mixed	False	H1654	two	Public	Brazil	AGE2182	13	adff0eaf-cd40-43af-8a93-4999dadeb66a	1639211	71	M	80	170	27.7	08/23/2020	14:59	False	False	False			D	Death	09/05/2020	06:00		Uninformed	7	Death	No		0	13			TRUE	08/23/2020	D	Death	09/05/2020	5	Death	13	TRUE	SUS (Unified Health System)	6	Transfer from another hospital/institution	1
Epimed Monitor	General/Mixed	False	H1654	two	Public	Brazil	AGE2182	13	1bbfa0af-2761-4d3a-bf8e-355d679091df	403717	53	M	150	170	51.9	08/25/2020	00:08	False	False	False			D	Death	09/05/2020	20:10		Uninformed	7	Death	No		0	11			TRUE	08/25/2020	D	Death	09/05/2020	5	Death	11	TRUE	SUS (Unified Health System)	6	Transfer from another hospital/institution	1
Epimed Monitor	General/Mixed	False	H1654	two	Public	Brazil	AGE2182	13	72b18ad5-5bff-4e90-bb28-3df5e41db467	1639319	58	M	123	180	38	08/26/2020	12:45	False	False	False			A	High	09/15/2020	10:25	2	Uninformed	1	Ward or room	No		2	20			TRUE	08/24/2020	A	High	09/17/2020	1	Residence	24	TRUE		1	Ward/Room	1
Epimed Monitor	General/Mixed	False	H1654	two	Public	Brazil	AGE2182	13	1a7ef089-9a94-445f-9f4e-53aa590db9ce	1639762	62	F	70	160	27.3	08/27/2020	21:30	False	False	False			D	Death	09/12/2020	02:30		Uninformed	7	Death	No		0	16			TRUE	08/27/2020	D	Death	09/12/2020	5	Death	16	TRUE	SUS (Unified Health System)	2	Emergency	1
Epimed Monitor	General/Mixed	False	H1654	two	Public	Brazil	AGE2182	13	eb70edd3-817c-4713-9917-4f3b1fd248bb	1639645	81	F	78	165	28.7	08/28/2020	15:00	False	False	False			D	Death	09/03/2020	19:30		Uninformed	7	Death	No		2	6			TRUE	08/26/2020	D	Death	09/03/2020	5	Death	8	TRUE		1	Ward/Room	1
Epimed Monitor	General/Mixed	False	H1654	two	Public	Brazil	AGE2182	13	a8af52ee-11bd-4a89-8601-7876cd88d9ac	1639864	93	F	55	150	24.4	08/29/2020	14:56	False	False	False			D	Death	08/29/2020	21:30		Uninformed	7	Death	No		3	1			TRUE	08/26/2020	D	Death	08/29/2020	5	Death	3	TRUE	SUS (Unified Health System)	1	Ward/Room	1
Epimed Monitor	General/Mixed	False	H1654	two	Public	Brazil	AGE2182	13	407e59fc-9141-451f-98fa-550e04d5755f	1639699	74	M	77	170	26.6	08/30/2020	16:45	False	False	False			D	Death	09/13/2020	00:54		Uninformed	7	Death	No		3	14			TRUE	08/27/2020	D	Death	09/13/2020	5	Death	17	TRUE		1	Ward/Room	1
Epimed Monitor	General/Mixed	False	H1654	two	Public	Brazil	AGE2182	13	ccefe4e0-e32a-4dbc-8926-193bbd679198	1639873	81	M	80	160	31.2	01/09/2020	08:49	False	False	False			A	High	10/05/2020	11:00	3	Uninformed	1	Ward or room	No		4	34			TRUE	08/28/2020	A	High	10/08/2020	1	Residence	41	TRUE	SUS (Unified Health System)	6	Transfer from another hospital/institution	1
Epimed Monitor	General/Mixed	False	H1654	two	Public	Brazil	AGE2182	13	1f25a850-e9cd-4648-b9b7-2c366f370ff4	1639470	57	M	65	170	22.5	01/09/2020	11:45	False	False	False			A	High	09/07/2020	11:54	4	Uninformed	1	Ward or room	No		7	6			TRUE	08/25/2020	A	High	09/09/2020	1	Residence	15	TRUE	SUS (Unified Health System)	1	Ward/Room	1
Epimed Monitor	General/Mixed	False	H1654	two	Public	Brazil	AGE2182	13	c6e1a99b-8c07-445a-98ac-d1a296c9fce5	529121	71	F				09/05/2020	10:49	False	False	False			D	Death	09/24/2020	22:00		Uninformed	7	Death	No		5	19			TRUE	08/31/2020	D	Death	09/24/2020	5	Death	24	TRUE		4	Another ICU/ICU in your hospital	1
Epimed Monitor	General/Mixed	False	H1654	two	Public	Brazil	AGE2182	13	91adf3c4-4670-46ff-a5eb-b0a9b9ed9109	1641215	85	M	80	155	33.3	09/11/2020	11:22	False	False	False			A	High	10/06/2020	14:10	28	No bed availability in the destination unit	1	Ward or room	No		1	25			TRUE	09/10/2020	A	High	10/14/2020	1	Residence	34	TRUE	SUS (Unified Health System)	1	Ward/Room	1
Epimed Monitor	General/Mixed	False	H1654	two	Public	Brazil	AGE2182	13	96deae25-7132-4298-bbc7-25116c7605ae	294342	62	M	90	178	28.4	09/13/2020	20:30	False	False	False			A	High	10/22/2020	10:25	2	Uninformed	1	Ward or room	No		0	39			TRUE	09/13/2020	A	High	10/31/2020	1	Residence	48	TRUE	SUS (Unified Health System)	1	Ward/Room	1
Epimed Monitor	General/Mixed	False	H1654	two	Public	Brazil	AGE2182	13	c1343a5a-8146-4a1d-b38c-040b48b8052e	1641692	27	M	131	186	37.9	09/15/2020	10:40	False	False	False			A	High	09/23/2020	12:00 pm	4	Uninformed	1	Ward or room	No		1	8			TRUE	09/14/2020	A	High	09/24/2020	1	Residence	10	TRUE	SUS (Unified Health System)	1	Ward/Room	1
Epimed Monitor	General/Mixed	False	H1654	two	Public	Brazil	AGE2182	13	ed07f3f4-8428-415b-9584-6625de00f8f0	1641690	78	F	80	160	31.2	09/15/2020	10:43	False	False	False			A	High	10/19/2020	14:20	5	No bed availability in the destination unit	1	Ward or room	No		1	34			TRUE	09/14/2020	A	High	10/24/2020	1	Residence	40	TRUE	SUS (Unified Health System)	1	Ward/Room	1
Epimed Monitor	General/Mixed	False	H1654	two	Public	Brazil	AGE2182	13	43c501cc-e700-4b01-9a0e-92b1902ba6b4	1641800	74	F	75	160	29.3	09/16/2020	15:45	False	False	False			D	Death	09/26/2020	00:45		Uninformed	7	Death	No		1	10			TRUE	09/15/2020	D	Death	09/26/2020	5	Death	11	TRUE		1	Ward/Room	1
Epimed Monitor	General/Mixed	False	H1654	two	Public	Brazil	AGE2182	13	d04de70f-f363-4c8c-a779-6aa0bbada22a	1641774	42	M	90	180	27.8	09/17/2020	13:40	False	False	False			A	High	09/29/2020	11:08	2	Uninformed	1	Ward or room	No		2	12			TRUE	09/15/2020	A	High	10/03/2020	1	Residence	18	TRUE	SUS (Unified Health System)	4	Another ICU/ICU in your hospital	1
Epimed Monitor	General/Mixed	False	H1654	two	Public	Brazil	AGE2182	13	d8394ee6-da65-41c0-acec-a66e404598b4	1641856	50	F	80	160	31.2	09/21/2020	10:27	False	False	False			A	High	09/23/2020	12:00 pm	2	Uninformed	1	Ward or room	No		5	2			TRUE	09/16/2020	A	High	09/25/2020	1	Residence	9	TRUE		1	Ward/Room	1
Epimed Monitor	General/Mixed	False	H1654	two	Public	Brazil	AGE2182	13	0b631db8-b128-4545-891b-bcb494d82e4f	1642862	52	F	98	158	39.3	09/24/2020	16:40	False	False	False			A	High	10/22/2020	21:00	6	Uninformed	1	Ward or room	No		0	28			TRUE	09/24/2020	A	High	10/27/2020	1	Residence	33	TRUE		6	Transfer from another hospital/institution	1
Epimed Monitor	General/Mixed	False	H1654	two	Public	Brazil	AGE2182	13	c70d57cf-d7a3-4ce4-8fe0-ba8890f66438	414676	49	F	70	165	25.7	09/25/2020	15:30	False	False	False			A	High	09/29/2020	10:52	2	Uninformed	1	Ward or room	No		0	4			TRUE	09/25/2020	A	High	09/30/2020	1	Residence	5	TRUE	SUS (Unified Health System)	6	Transfer from another hospital/institution	1
Epimed Monitor	General/Mixed	False	H1654	two	Public	Brazil	AGE2182	13	911b5f7f-2ec3-4ab7-9795-a8950d1293c2	1642809	60	M	80	178	25.2	09/26/2020	16:30	False	False	False			A	High	01/10/2020	11:30	3	Uninformed	1	Ward or room	No		2	5			TRUE	09/24/2020	A	High	10/02/2020	1	Residence	8	TRUE		1	Ward/Room	1
Epimed Monitor	General/Mixed	False	H1654	two	Public	Brazil	AGE2182	13	dad0499f-08b2-49d0-831a-472d8a3ea77c	09/26/2020	86	M	70	160	27.3	09/26/2020	21:30	False	False	False			A	High	10/05/2020	11:00	3	Uninformed	1	Ward or room	No		0	9			TRUE	09/26/2020	A	High	10/09/2020	1	Residence	13	TRUE		1	Ward/Room	1
Epimed Monitor	General/Mixed	False	H1654	two	Public	Brazil	AGE2182	13	0b3d0950-6af5-4eb6-8175-77243f8c94c8	192592	67	M	120	179	37.5	09/27/2020	13:50	False	False	False			D	Death	10/11/2020	19:30		Uninformed	7	Death	No		1	14			TRUE	09/26/2020	D	Death	10/11/2020	5	Death	15	TRUE	SUS (Unified Health System)	1	Ward/Room	1
Epimed Monitor	General/Mixed	False	H1654	two	Public	Brazil	AGE2182	13	f78232d8-1d00-4fe0-9676-856bc19a26fe	1643862	55	M	90	170	31.1	10/05/2020	12:51	False	False	False			D	Death	10/13/2020	07:50		Uninformed	7	Death	No		0	8			TRUE	10/05/2020	D	Death	10/13/2020	5	Death	8	TRUE	SUS (Unified Health System)	2	Emergency	1
Epimed Monitor	General/Mixed	False	H1654	two	Public	Brazil	AGE2182	13	324b9679-9b68-44b7-bebd-a29bbd52835c	1643795	79	F	70	155	29.1	10/06/2020	09:00	False	False	False			D	Death	10/28/2020	22:40		Uninformed	7	Death	No		3	22			TRUE	10/03/2020	D	Death	10/28/2020	5	Death	25	TRUE	SUS (Unified Health System)	1	Ward/Room	1
Epimed Monitor	General/Mixed	False	H1654	two	Public	Brazil	AGE2182	13	c45fbc21-af84-4535-a7d0-f0ade0e4158e	1644262	73	M				10/08/2020	14:20	False	False	False			A	High	10/19/2020	14:00	4	No bed availability in the destination unit	1	Ward or room	No		0	11			TRUE	10/08/2020	A	High	10/20/2020	1	Residence	12	TRUE		1	Ward/Room	1
Epimed Monitor	General/Mixed	False	H1654	two	Public	Brazil	AGE2182	13	4a185ea5-5e4f-47ef-929a-c5e20003dd14	1644352	71	M	70	160	27.3	10/09/2020	11:00	False	False	False			A	High	10/25/2020	12:45	27	No bed availability in the destination unit	1	Ward or room	No		2	16			TRUE	10/07/2020	A	High	10/28/2020	1	Residence	21	TRUE	SUS (Unified Health System)	2	Emergency	1
Epimed Monitor	General/Mixed	False	H1654	two	Public	Brazil	AGE2182	13	1f8633b7-058d-4de0-a7bd-fe7a2ac3fc30	563026	90	M				10/10/2020	11:30	False	False	False			D	Death	10/17/2020	07:05		Uninformed	7	Death	No		4	7			TRUE	10/06/2020	D	Death	10/17/2020	5	Death	11	TRUE	SUS (Unified Health System)	2	Emergency	1
Epimed Monitor	General/Mixed	False	H1654	two	Public	Brazil	AGE2182	13	b9fa09ac-ccd3-43c2-8d25-951da159a0c7	1644694	35	M	85	165	31.2	10/15/2020	11:56	False	False	False			A	High	10/21/2020	11:30	2	Uninformed	1	Ward or room	No		1	6			TRUE	10/14/2020	A	High	10/25/2020	1	Residence	11	TRUE	SUS (Unified Health System)	1	Ward/Room	1
Epimed Monitor	General/Mixed	False	H1654	two	Public	Brazil	AGE2182	13	c0315818-5045-4743-919c-b80705f72bb8	1644957	42	M				10/18/2020	15:00	False	False	False			A	High	11/23/2020	14:00	5	No bed availability in the destination unit	1	Ward or room	No		0	36			TRUE	10/18/2020	A	High	11/28/2020	1	Residence	41	TRUE	SUS (Unified Health System)	6	Transfer from another hospital/institution	1
Epimed Monitor	General/Mixed	False	H1654	two	Public	Brazil	AGE2182	13	4279183e-ba3a-41c7-ad22-01e343d7c8eb	814113	62	F				10/19/2020	21:00	False	False	False			D	Death	10/20/2020	07:40		Uninformed	7	Death	No		8	1			TRUE	10/11/2020	D	Death	10/20/2020	5	Death	9	TRUE	SUS (Unified Health System)	6	Transfer from another hospital/institution	1
Epimed Monitor	General/Mixed	False	H1654	two	Public	Brazil	AGE2182	13	4279183e-ba3a-41c7-ad22-01e343d7c8eb	814113	62	F				10/19/2020	22:00	False	False	False			D	Death	10/20/2020	07:50		Uninformed	7	Death	No		8	1			TRUE	10/11/2020	D	Death	10/20/2020	5	Death	9	TRUE		4	Another ICU/ICU in your hospital	1
Epimed Monitor	General/Mixed	False	H1654	two	Public	Brazil	AGE2182	13	af480826-dfe5-41a1-8a5f-bfe3e0c54cc7	742180	68	M				10/21/2020	16:20	False	False	False			A	High	05/11/2020	21:14			3	Another hospital ICU/ICU	No		0	15			TRUE	10/21/2020	A	High	11/25/2020	1	Residence	35	TRUE	SUS (Unified Health System)	6	Transfer from another hospital/institution	1
Epimed Monitor	General/Mixed	False	H1654	two	Public	Brazil	AGE2182	13	892a622c-5988-4fe0-a0b3-c27508fddf9a	402621	77	M	75	170	26	10/22/2020	02:07	False	False	False			D	Death	03/11/2020	16:30		Uninformed	7	Death	No		1	12			TRUE	10/21/2020	D	Death	03/11/2020	5	Death	13	TRUE	SUS (Unified Health System)	1	Ward/Room	1
Epimed Monitor	General/Mixed	False	H1654	two	Public	Brazil	AGE2182	13	c14347bd-4b61-4457-92d3-4e4902461368	1645538	88	M	85	165	31.2	10/24/2020	18:17	False	False	False			D	Death	09/11/2020	22:30		Uninformed	7	Death	No		0	16			TRUE	10/24/2020	D	Death	09/11/2020	5	Death	16	TRUE	SUS (Unified Health System)	6	Transfer from another hospital/institution	1
Epimed Monitor	General/Mixed	False	H1654	two	Public	Brazil	AGE2182	13	bf25cc34-0516-4ee0-808a-fa0f3f0d40ee	1645520	59	F	62	160	24.2	10/25/2020	4:00 pm	False	False	False			A	High	10/27/2020	10:30	1	Uninformed	1	Ward or room	No		3	2			TRUE	10/22/2020	A	High	10/29/2020	1	Residence	7	TRUE	SUS (Unified Health System)	1	Ward/Room	1
Epimed Monitor	General/Mixed	False	H1654	two	Public	Brazil	AGE2182	13	8ce0bb1e-ec31-4ac5-b10d-7d6502859f49	1645496	61	M	75	170	26	10/27/2020	10:46	False	False	False			D	Death	05/11/2020	22:14		Uninformed	7	Death	No		4	9			TRUE	10/23/2020	D	Death	05/11/2020	5	Death	13	TRUE	SUS (Unified Health System)	4	Another ICU/ICU in your hospital	1
Epimed Monitor	General/Mixed	False	H1654	two	Public	Brazil	AGE2182	13	31b521c3-7e14-4cce-9302-66033cb4f57a	1645386	77	M	70	160	27.3	10/28/2020	11:24	False	False	False			A	High	11/10/2020	13:00	3	Uninformed	1	Ward or room	No		6	13			TRUE	10/22/2020	A	High	12/11/2020	1	Residence	50	TRUE	SUS (Unified Health System)	1	Ward/Room	1
Epimed Monitor	General/Mixed	False	H1654	two	Public	Brazil	AGE2182	13	dc5604e4-2c8f-4c9c-901a-59b5c1ec07e6	1645542	79	F	65	160	25.4	10/28/2020	15:30	False	False	False			D	Death	09/11/2020	18:00		Uninformed	7	Death	No		4	12			TRUE	10/24/2020	D	Death	09/11/2020	5	Death	16	TRUE		1	Ward/Room	1
Epimed Monitor	General/Mixed	False	H1654	two	Public	Brazil	AGE2182	13	62f39464-0f06-4c7a-a3c7-63f2a527e5a5	1645403	73	F	60	155	25	10/28/2020	21:00	False	False	False			D	Death	11/10/2020	21:30		Uninformed	7	Death	No		6	13			TRUE	10/22/2020	D	Death	11/10/2020	5	Death	19	TRUE	SUS (Unified Health System)	1	Ward/Room	1
Epimed Monitor	General/Mixed	False	H1654	two	Public	Brazil	AGE2182	13	6f0fa0f9-6505-4474-945c-61bfd6f77a88	1096881	65	M	80	170	27.7	10/29/2020	15:00	False	False	False			D	Death	11/16/2020	08:20		Uninformed	7	Death	No		2	18			TRUE	10/27/2020	D	Death	11/16/2020	5	Death	20	TRUE	SUS (Unified Health System)	1	Ward/Room	1
Epimed Monitor	General/Mixed	False	H1654	two	Public	Brazil	AGE2182	13	b615203d-360b-47f8-97bb-497692e27ef5	1646330	72	M	85	178	26.8	05/11/2020	09:30	False	False	False			D	Death	11/24/2020	02:44		Uninformed	7	Death	No		1	19			TRUE	04/11/2020	D	Death	11/24/2020	5	Death	20	TRUE		1	Ward/Room	1
Epimed Monitor	General/Mixed	False	H1654	two	Public	Brazil	AGE2182	13	a5aad0f7-94dd-407a-872b-44988e0eab0c	467047	77	M				05/11/2020	15:20	False	False	False			D	Death	09/11/2020	11:25		Uninformed	7	Death	No		0	4			TRUE	05/11/2020	D	Death	09/11/2020	5	Death	4	TRUE	SUS (Unified Health System)	6	Transfer from another hospital/institution	1
Epimed Monitor	General/Mixed	False	H1654	two	Public	Brazil	AGE2182	13	1b7d70ae-f77b-45b5-99cd-d2c793731abd	1646472	85	M	85	178	26.8	09/11/2020	11:10	False	False	False			D	Death	11/16/2020	19:00		Uninformed	7	Death	No		4	7			TRUE	05/11/2020	D	Death	11/16/2020	5	Death	11	TRUE		1	Ward/Room	1
Epimed Monitor	General/Mixed	False	H1654	two	Public	Brazil	AGE2182	13	dfabea8c-3d01-41aa-b529-29cc13b93256	1646716	86	M				11/10/2020	12:00 pm	False	False	False			A	High	11/18/2020	09:00	0	Uninformed	1	Ward or room	No		0	8			TRUE	11/10/2020	A	High	11/25/2020	1	Residence	15	TRUE	SUS (Unified Health System)	6	Transfer from another hospital/institution	1
Epimed Monitor	General/Mixed	False	H1654	two	Public	Brazil	AGE2182	13	df5a7629-c20c-4057-89fb-709e6834f345	1646473	70	F				11/10/2020	12:15	False	False	False			D	Death	11/20/2020	09:00		Uninformed	7	Death	No		5	10			TRUE	05/11/2020	D	Death	11/20/2020	5	Death	15	TRUE	SUS (Unified Health System)	6	Transfer from another hospital/institution	1
Epimed Monitor	General/Mixed	False	H1654	two	Public	Brazil	AGE2182	13	f7d5be8f-71b8-4323-991f-eb246ea0aa16	2665612	66	M	100	175	32.7	11/11/2020	00:43	False	False	False			D	Death	11/25/2020	14:29		Uninformed	7	Death	No		0	14			TRUE	11/11/2020	D	Death	11/25/2020	5	Death	14	TRUE	SUS (Unified Health System)	1	Ward/Room	1
Epimed Monitor	General/Mixed	False	H1654	two	Public	Brazil	AGE2182	13	cfd5f5cc-bdf5-4242-a7c2-57cf7d4e7d01	889,377	79	F	95	160	37.1	11/13/2020	21:00	False	False	False			D	Death	01/12/2020	02:30		Uninformed	7	Death	No		0	18			TRUE	11/13/2020	D	Death	01/12/2020	5	Death	18	TRUE	SUS (Unified Health System)	2	Emergency	1
Epimed Monitor	General/Mixed	False	H1654	two	Public	Brazil	AGE2182	13	321d0707-2fb6-44e5-91a9-cab4dae4452d	1647068	51	M	120	195	31.6	11/14/2020	18:30	False	False	False			A	High	11/22/2020	11:58	1	Uninformed	1	Ward or room	No		1	8			TRUE	11/13/2020	A	High	11/25/2020	1	Residence	12	TRUE	SUS (Unified Health System)	1	Ward/Room	1
Epimed Monitor	General/Mixed	False	H1654	two	Public	Brazil	AGE2182	13	1e9d9f6a-ef1a-48c1-b54b-3d5280ff5d66	1647650	74	F	70	165	25.7	11/20/2020	13:09	False	False	False			A	High	11/26/2020	14:50	1	Uninformed	1	Ward or room	No		0	6			TRUE	11/20/2020	A	High	12/09/2020	1	Residence	19	TRUE	SUS (Unified Health System)	2	Emergency	1
Epimed Monitor	General/Mixed	False	H1654	two	Public	Brazil	AGE2182	13	6e8c562c-df24-4ab3-bbb0-9cb88b0047de	1647725	39	M				11/21/2020	11:40	False	False	False			A	High	11/23/2020	11:30	3	Uninformed	1	Ward or room	No		0	2			TRUE	11/21/2020	A	High	11/25/2020	1	Residence	4	TRUE		6	Transfer from another hospital/institution	1
Epimed Monitor	General/Mixed	False	H1654	two	Public	Brazil	AGE2182	13	09c62200-1c23-4403-95d1-657e14129e76	1647328	46	M	100	180	30.9	11/22/2020	21:30	False	False	False			D	Death	11/24/2020	14:07		Uninformed	7	Death	No		5	2			TRUE	11/17/2020	D	Death	11/24/2020	5	Death	7	TRUE		1	Ward/Room	1
Epimed Monitor	General/Mixed	False	H1654	two	Public	Brazil	AGE2182	13	c8152422-bd1b-4ea2-a782-dbcc79361011	1647714	62	M				11/23/2020	12:00 pm	False	False	False			D	Death	12/07/2020	14:00		Uninformed	7	Death	No		2	14			TRUE	11/21/2020	D	Death	12/07/2020	5	Death	16	TRUE	SUS (Unified Health System)	1	Ward/Room	1
Epimed Monitor	General/Mixed	False	H1654	two	Public	Brazil	AGE2182	13	0ac71e1a-d574-4a71-bd66-b230b2957f3e	103933	83	M	85	180	26.2	11/23/2020	20:30	False	False	False			A	High	11/24/2020	14:07	0	Uninformed			No		0	1			TRUE	11/23/2020	D	Death	12/09/2020	5	Death	16	TRUE	SUS (Unified Health System)	2	Emergency	1
Epimed Monitor	General/Mixed	False	H1654	two	Public	Brazil	AGE2182	13	0ac71e1a-d574-4a71-bd66-b230b2957f3e	103933	83	M	65	165	23.9	11/23/2020	20:30	TRUE	TRUE	TRUE			D	Death	12/09/2020	15:10		Uninformed	7	Death	No		0	16			TRUE	11/23/2020	D	Death	12/09/2020	5	Death	16	TRUE	SUS (Unified Health System)	2	Emergency	1
Epimed Monitor	General/Mixed	False	H1654	two	Public	Brazil	AGE2182	13	609070cd-e104-4672-b27a-90556c549ee0	1647733	76	M				11/24/2020	12:00 pm	False	False	False			D	Death	03/12/2020	11:24		Uninformed	7	Death	No		0	9			TRUE	11/24/2020	D	Death	03/12/2020	5	Death	9	TRUE		1	Ward/Room	1
Epimed Monitor	General/Mixed	False	H1654	two	Public	Brazil	AGE2182	13	e9dfef99-d86d-44b3-93f3-b2f1b269897c	150308	82	F				11/24/2020	15:30	False	False	False			A	High	04/12/2020	13:31			3	Another hospital ICU/ICU	No		0	10			TRUE	11/24/2020	D	Death	12/07/2020	5	Death	13	TRUE		1	Ward/Room	1
Epimed Monitor	General/Mixed	False	H1654	two	Public	Brazil	AGE2182	13	95b27381-37f4-4dc1-9f95-667d9fc813f7	1647982	79	M	75	180	23.1	11/24/2020	21:41	False	False	False			D	Death	11/29/2020	09:00		Uninformed	7	Death	No		0	5			TRUE	11/24/2020	D	Death	11/29/2020	5	Death	5	TRUE		2	Emergency	1
Epimed Monitor	General/Mixed	False	H1654	two	Public	Brazil	AGE2182	13	3c0219b1-419a-4258-be51-be077a2b9b0f	1647876	39	F	60	165	22	11/25/2020	09:36	False	False	False			D	Death	11/29/2020	14:30		Uninformed	7	Death	No		2	4			TRUE	11/23/2020	D	Death	11/29/2020	5	Death	6	TRUE	SUS (Unified Health System)	1	Ward/Room	1
Epimed Monitor	General/Mixed	False	H1654	two	Public	Brazil	AGE2182	13	d83dc464-9a85-48ee-83ab-1d9e5a3b726a	1647865	56	M	75	160	29.3	11/25/2020	14:57	False	False	False			D	Death	12/20/2020	4:00 am		Uninformed	7	Death	No		2	25			TRUE	11/23/2020	D	Death	12/20/2020	5	Death	27	TRUE	SUS (Unified Health System)	1	Ward/Room	1
Epimed Monitor	General/Mixed	False	H1654	two	Public	Brazil	AGE2182	13	f629527c-8e99-439e-8082-42a843c3f6b7	1648112	63	M	75	165	27.5	11/25/2020	17:30	False	False	False			D	Death	12/08/2020	10:30		Uninformed	7	Death	No		0	13			TRUE	11/25/2020	D	Death	12/08/2020	5	Death	13	TRUE	SUS (Unified Health System)	2	Emergency	1
Epimed Monitor	General/Mixed	False	H1654	two	Public	Brazil	AGE2182	13	b97ae648-4ade-4c2a-b8c4-3bb3467cbaed	911823	27	F	65	165	23.9	11/26/2020	23:55	False	False	False			A	High	11/30/2020	14:00	5	Waiting for family	1	Ward or room	No		0	4			TRUE	11/26/2020	A	High	03/12/2020	1	Residence	7	TRUE	SUS (Unified Health System)	6	Transfer from another hospital/institution	1
Epimed Monitor	General/Mixed	False	H1654	two	Public	Brazil	AGE2182	13	dceae78a-ffee-4d97-bc63-14aede1da936	1648413	81	M	73	173	24.4	11/30/2020	11:00	False	False	False			D	Death	03/12/2020	14:30		Uninformed	7	Death	No		0	3			TRUE	11/30/2020	D	Death	03/12/2020	5	Death	3	TRUE		6	Transfer from another hospital/institution	1
Epimed Monitor	General/Mixed	False	H1654	two	Public	Brazil	AGE2182	13	c9196fa9-a667-4909-bb4b-7f71b90286c0	1648480	57	M	98	180	30.2	11/30/2020	15:47	False	False	False			D	Death	12/14/2020	8:00 pm		Uninformed	7	Death	No		0	14			TRUE	11/30/2020	D	Death	12/14/2020	5	Death	14	TRUE	SUS (Unified Health System)	6	Transfer from another hospital/institution	1
Epimed Monitor	General/Mixed	False	H1654	two	Public	Brazil	AGE2182	13	6c5f9aa2-6289-4a62-8b1c-547355f87f56	1648486	63	F	89	165	32.7	01/12/2020	11:00	False	False	False			D	Death	12/19/2020	04:18		Uninformed	7	Death	No		1	18			TRUE	11/30/2020	D	Death	12/19/2020	5	Death	19	TRUE		1	Ward/Room	1
Epimed Monitor	General/Mixed	False	H1654	two	Public	Brazil	AGE2182	13	3255f888-94bb-423e-bfba-54bb4fb88a42	1648361	67	M				12/02/2020	13:15	False	False	False			D	Death	12/14/2020	09:00		Uninformed	7	Death	No		3	12			TRUE	11/29/2020	D	Death	12/14/2020	5	Death	15	TRUE		4	Another ICU/ICU in your hospital	1
Epimed Monitor	General/Mixed	False	H1654	two	Public	Brazil	AGE2182	13	9004e813-2932-404d-8f51-ce1ef94a321c	1648587	48	F				04/12/2020	11:28	False	False	False			A	High	01/13/2021	12:00 pm	3	Uninformed	1	Ward or room	No		3	40			TRUE	01/12/2020	A	High	01/21/2021	1	Residence	51	TRUE		4	Another ICU/ICU in your hospital	1
Epimed Monitor	General/Mixed	False	H1654	two	Public	Brazil	AGE2182	13	a05b5127-0bd7-482c-b8ad-1b5021d84055	1648327	48	M				04/12/2020	13:33	False	False	False			D	Death	12/12/2020	20:20		Uninformed	7	Death	No		7	8			TRUE	11/27/2020	D	Death	12/12/2020	5	Death	15	TRUE		2	Emergency	1
Epimed Monitor	General/Mixed	False	H1654	two	Public	Brazil	AGE2182	13	f2c75ca1-d8dd-4d12-9474-9989a3a20e83	1648859	64	M	80	180	24.7	04/12/2020	23:00	False	False	False			D	Death	12/14/2020	15:30		Uninformed	7	Death	No		0	10			TRUE	04/12/2020	D	Death	12/14/2020	5	Death	10	TRUE	SUS (Unified Health System)	2	Emergency	1
Epimed Monitor	General/Mixed	False	H1654	two	Public	Brazil	AGE2182	13	26197bfe-5226-44f4-8b7c-f820f7fa6df2	1649035	57	F	80	160	31.2	12/08/2020	10:30	False	False	False			A	High	12/31/2020	10:00 am	2	Uninformed	1	Ward or room	No		1	23			TRUE	12/07/2020	A	High	01/12/2021	1	Residence	36	TRUE		1	Ward/Room	1
Epimed Monitor	General/Mixed	False	H1654	two	Public	Brazil	AGE2182	13	c84d75e6-f06d-47dc-bea7-b02a86703cb3	1648856	64	M	80	168	28.3	12/08/2020	12:01	False	False	False			A	High	12/09/2020	11:00	2	Uninformed	1	Ward or room	No		4	1			TRUE	04/12/2020	D	Death	12/27/2020	5	Death	23	TRUE		1	Ward/Room	1
Epimed Monitor	General/Mixed	False	H1654	two	Public	Brazil	AGE2182	13	ef106eb5-708c-411d-ae9a-30b214a38261	1648919	53	F	100	160	39.1	12/08/2020	14:00	False	False	False			A	High	05/01/2021	12:00 pm	3	Uninformed	1	Ward or room	No		2	28			TRUE	12/06/2020	A	High	01/11/2021	1	Residence	36	TRUE		1	Ward/Room	1
Epimed Monitor	General/Mixed	False	H1654	two	Public	Brazil	AGE2182	13	8659d103-2b75-4ef8-95d3-d672f771f31c	1649122	57	F	85	160	33.2	12/08/2020	15:30	False	False	False			D	Death	12/14/2020	08:30		Uninformed	7	Death	No		0	6			TRUE	12/08/2020	D	Death	12/14/2020	5	Death	6	TRUE		6	Transfer from another hospital/institution	1
Epimed Monitor	General/Mixed	False	H1654	two	Public	Brazil	AGE2182	13	6fed0fb4-5227-44dd-873e-1e3a6829df00	1648856	82	M	80	170	27.7	12/11/2020	23:02	TRUE	False	False			D	Death	12/27/2020	05:15		Uninformed	7	Death	No		7	16			TRUE	04/12/2020	D	Death	12/27/2020	5	Death	23	TRUE	SUS (Unified Health System)	1	Ward/Room	1
Epimed Monitor	General/Mixed	False	H1654	two	Public	Brazil	AGE2182	13	3713d6d4-4db1-4324-a42d-4a77cc9254b5	454179	53	F	90	160	35.2	12/12/2020	23:30	False	False	False			D	Death	01/06/2021	23:40		Uninformed	7	Death	No		3	25			TRUE	12/09/2020	D	Death	01/06/2021	5	Death	28	TRUE	SUS (Unified Health System)	1	Ward/Room	1
Epimed Monitor	General/Mixed	False	H1654	two	Public	Brazil	AGE2182	13	fdfc49d5-196f-4c42-b744-8ae2f6c76ed7	1649447	58	M	100	170	34.6	12/13/2020	08:06	False	False	False			D	Death	12/20/2020	06:00		Uninformed	7	Death	No		1	7			TRUE	12/12/2020	D	Death	12/20/2020	5	Death	8	TRUE	SUS (Unified Health System)	1	Ward/Room	1
Epimed Monitor	General/Mixed	False	H1654	two	Public	Brazil	AGE2182	13	cbb2ef2c-4077-40aa-b5f5-0ad508b57839	1649549	25	F				12/14/2020	18:00	False	False	False			A	High	01/08/2021	13:00	4	Uninformed	1	Ward or room	No		0	25			TRUE	12/14/2020	A	High	01/12/2021	1	Residence	29	TRUE		6	Transfer from another hospital/institution	1
Epimed Monitor	General/Mixed	False	H1654	two	Public	Brazil	AGE2182	13	5a4822cb-2fe1-4e13-8d14-36080618ae86	1649560	60	M	80	170	27.7	12/14/2020	22:55	False	False	False			D	Death	01/24/2021	07:58		Uninformed	7	Death	No		0	41			TRUE	12/14/2020	D	Death	01/24/2021	5	Death	41	TRUE	SUS (Unified Health System)	6	Transfer from another hospital/institution	1
Epimed Monitor	General/Mixed	False	H1654	two	Public	Brazil	AGE2182	13	afeac966-d251-4c47-81de-190d7818f0a2	141418	65	M	80	170	27.7	15/12/2020	09:00	False	False	False			D	Death	05/01/2021	04:20		Uninformed	7	Death	No		4	21			TRUE	12/11/2020	D	Death	05/01/2021	5	Death	25	TRUE	SUS (Unified Health System)	1	Ward/Room	1
Epimed Monitor	General/Mixed	False	H1654	two	Public	Brazil	AGE2182	13	5a679c7a-2435-4581-b724-f502729a46a2	1102660	79	M	75	170	26	12/16/2020	00:25	False	False	False			D	Death	12/23/2020	00:40		Uninformed	7	Death	No		0	7			TRUE	12/16/2020	D	Death	12/23/2020	5	Death	7	TRUE	SUS (Unified Health System)	2	Emergency	1
Epimed Monitor	General/Mixed	False	H1654	two	Public	Brazil	AGE2182	13	36eb0cd9-2536-4592-aa01-41c61a70fdca	1649775	69	M	60	170	20.8	12/16/2020	12:06	False	False	False			D	Death	12/27/2020	22:30		Uninformed	7	Death	No		0	11			TRUE	12/16/2020	D	Death	12/27/2020	5	Death	11	TRUE	SUS (Unified Health System)	6	Transfer from another hospital/institution	1
Epimed Monitor	General/Mixed	False	H1654	two	Public	Brazil	AGE2182	13	2005dc50-5e94-4704-bcce-e32b6275d0ad	1649677	26	M				12/17/2020	13:30	False	False	False			A	High	01/03/2021	12:17	2	Uninformed	1	Ward or room	No		2	17			TRUE	15/12/2020	A	High	05/01/2021	1	Residence	21	TRUE		1	Ward/Room	1
Epimed Monitor	General/Mixed	False	H1654	two	Public	Brazil	AGE2182	13	f15f90b5-1f22-49d1-bee1-88ce10441e48	1649853	74	M	65	160	25.4	12/19/2020	13:19	False	False	False			D	Death	01/04/2021	23:00		Uninformed	7	Death	No		2	16			TRUE	12/17/2020	D	Death	01/04/2021	5	Death	18	TRUE	SUS (Unified Health System)	1	Ward/Room	1
Epimed Monitor	General/Mixed	False	H1654	two	Public	Brazil	AGE2182	13	cab672d9-b9e8-48c3-a153-7a6dcbdd55c0	486636	71	M	120	190	33.2	12/22/2020	20:35	False	False	False			D	Death	12/30/2020	05:30		Uninformed	7	Death	No		0	8			TRUE	12/22/2020	D	Death	12/30/2020	5	Death	8	TRUE	SUS (Unified Health System)	6	Transfer from another hospital/institution	1
Epimed Monitor	General/Mixed	False	H1654	two	Public	Brazil	AGE2182	13	3dafd668-3284-45ad-90a7-566b0a6b9c6b	1650355	56	M				12/23/2020	23:00	False	False	False			D	Death	01/21/2021	09:30		Uninformed	7	Death	No		0	29			TRUE	12/23/2020	D	Death	01/21/2021	5	Death	29	TRUE		1	Ward/Room	1
Epimed Monitor	General/Mixed	False	H1654	two	Public	Brazil	AGE2182	13	c02b4847-dc5c-47d0-a246-dc4c8849a3b8	1650809	48	F				02/01/2021	17:00	False	False	False			A	High	01/06/2021	13:41	3	Uninformed	1	Ward or room	No		1	4			TRUE	01/01/2021	A	High	01/11/2021	1	Residence	10	TRUE		6	Transfer from another hospital/institution	1
Epimed Monitor	General/Mixed	False	H1654	two	Public	Brazil	AGE2182	13	d4c9e005-8199-4274-8b36-518ba76341a1	1650848	90	F	80	165	29.4	01/03/2021	18:11	False	False	False			D	Death	01/10/2021	22:30		Uninformed	7	Death	No		0	7			TRUE	01/03/2021	D	Death	01/10/2021	5	Death	7	TRUE	SUS (Unified Health System)	6	Transfer from another hospital/institution	1
Epimed Monitor	General/Mixed	False	H1654	two	Public	Brazil	AGE2182	13	0ffed6bd-16cc-4c16-bf34-b223890d2ba6	1651229	69	M				01/06/2021	19:00	False	False	False			D	Death	01/11/2021	07:52		Uninformed	7	Death	No		0	5			TRUE	01/06/2021	D	Death	01/11/2021	5	Death	5	TRUE		6	Transfer from another hospital/institution	1
Epimed Monitor	General/Mixed	False	H1654	two	Public	Brazil	AGE2182	13	b3a0b9b1-b4f3-4a20-876a-ee2065045d3b	438893	79	M	60	168	21.3	07/01/2021	02:43	False	False	False			D	Death	01/13/2021	00:30		Uninformed	7	Death	No		0	6			TRUE	07/01/2021	D	Death	01/13/2021	5	Death	6	TRUE	SUS (Unified Health System)	1	Ward/Room	1
Epimed Monitor	General/Mixed	False	H1654	two	Public	Brazil	AGE2182	13	facca21a-f6d7-4f16-b82b-e63e3d05a5ad	1651475	71	F	90	160	35.2	01/08/2021	20:56	False	False	False			D	Death	01/22/2021	21:00		Uninformed	7	Death	No		0	14			TRUE	01/08/2021	D	Death	01/22/2021	5	Death	14	TRUE		6	Transfer from another hospital/institution	1
Epimed Monitor	General/Mixed	False	H1654	two	Public	Brazil	AGE2182	13	c9a63b2d-721d-48d8-b344-d380c469d169	1651628	58	F				01/11/2021	18:20	False	False	False			A	High	01/14/2021	11:00	0	Uninformed	1	Ward or room	No		0	3			TRUE	01/11/2021	A	High	01/16/2021	1	Residence	5	TRUE		6	Transfer from another hospital/institution	1
Epimed Monitor	General/Mixed	False	H1654	two	Public	Brazil	AGE2182	13	ac389be9-a1ed-42c6-afed-15396b8856f3	1651636	77	M				01/12/2021	01:00	False	False	False			D	Death	01/25/2021	11:05		Uninformed	7	Death	No		0	13			TRUE	01/12/2021	D	Death	01/25/2021	5	Death	13	TRUE		6	Transfer from another hospital/institution	1
Epimed Monitor	General/Mixed	False	H1654	two	Public	Brazil	AGE2182	13	911824cd-3dfa-4c81-890e-dba7c095f66f	1651205	80	M				01/13/2021	11:20	False	False	False			D	Death	01/16/2021	01:00		Uninformed	7	Death	No		7	3			TRUE	01/06/2021	D	Death	01/16/2021	5	Death	10	TRUE		1	Ward/Room	1
Epimed Monitor	General/Mixed	False	H1654	two	Public	Brazil	AGE2182	13	ef7a15fc-e9ff-4835-98c8-6295d0e6fb3d	1651850	37	F				01/13/2021	18:00	False	False	False			D	Death	01/30/2021	05:00		Uninformed	7	Death	No		0	17			TRUE	01/13/2021	D	Death	01/30/2021	5	Death	17	TRUE		2	Emergency	1
Epimed Monitor	General/Mixed	False	H1654	two	Public	Brazil	AGE2182	13	4d8bd41f-1b74-40a5-a8a9-255c751e2289	1651512	64	F				01/15/2021	10:00 am	False	False	False			D	Death	01/31/2021	08:40		Uninformed	7	Death	No		5	16			TRUE	01/10/2021	D	Death	01/31/2021	5	Death	21	TRUE		1	Ward/Room	1
Epimed Monitor	General/Mixed	False	H1654	two	Public	Brazil	AGE2182	13	f4c6a19a-0707-4eca-aded-92974b50d066	1652030	47	F				01/15/2021	14:20	False	False	False			A	High	02/12/2021	15:04	0	Uninformed	1	Ward or room	No		0	28			TRUE	01/15/2021	A	High	02/25/2021	1	Residence	41	TRUE		6	Transfer from another hospital/institution	1
Epimed Monitor	General/Mixed	False	H1654	two	Public	Brazil	AGE2182	13	76494abe-52be-4134-8b98-6babf93d86c9	1652052	58	M				01/15/2021	18:30	False	False	False			D	Death	02/03/2021	11:20		Uninformed	7	Death	No		0	19			TRUE	01/15/2021	D	Death	02/03/2021	5	Death	19	TRUE		6	Transfer from another hospital/institution	1
Epimed Monitor	General/Mixed	False	H1654	two	Public	Brazil	AGE2182	13	18b8bf24-f1e9-4001-9387-15f976f8cc62	1652095	72	M				01/18/2021	10:00 am	False	False	False			D	Death	01/30/2021	12:30		Uninformed	7	Death	No		1	12			TRUE	01/17/2021	D	Death	01/30/2021	5	Death	13	TRUE		1	Ward/Room	1
Epimed Monitor	General/Mixed	False	H1654	two	Public	Brazil	AGE2182	13	a946e71d-2101-4787-9ebc-ebf9540e4cdd	1652219	64	F				01/18/2021	19:30	False	False	False			D	Death	01/23/2021	06:29		Uninformed	7	Death	No		0	5			TRUE	01/18/2021	D	Death	01/23/2021	5	Death	5	TRUE		6	Transfer from another hospital/institution	1
Epimed Monitor	General/Mixed	False	H1654	two	Public	Brazil	AGE2182	13	074c0fab-3958-47f6-b735-e54f2fded612	1652320	66	F				01/19/2021	18:00	False	False	False			D	Death	01/30/2021	13:18		Uninformed	7	Death	No		0	11			TRUE	01/19/2021	D	Death	01/30/2021	5	Death	11	TRUE		2	Emergency	1
Epimed Monitor	General/Mixed	False	H1654	two	Public	Brazil	AGE2182	13	6bad7129-3f75-45ee-a778-107a8a6b5d94	1652586	80	M				01/22/2021	18:30	False	False	False			D	Death	02/02/2021	22:20		Uninformed	7	Death	No		1	11			TRUE	01/21/2021	D	Death	02/02/2021	5	Death	12	TRUE		6	Transfer from another hospital/institution	1
Epimed Monitor	General/Mixed	False	H1654	two	Public	Brazil	AGE2182	13	75fe4603-3168-40e8-b028-3054a3ce5b6a	1652689	61	F				01/23/2021	11:10	False	False	False			D	Death	02/05/2021	16:40		Uninformed	7	Death	No		1	13			TRUE	01/22/2021	D	Death	02/05/2021	5	Death	14	TRUE		1	Ward/Room	1
Epimed Monitor	General/Mixed	False	H1654	two	Public	Brazil	AGE2182	13	c542825f-3af2-41cf-b2d2-005acf372a19	1652721	67	M				01/25/2021	08:30	False	False	False			A	High	03/04/2021	11:00			3	Another hospital ICU/ICU	No		2	38			TRUE	01/23/2021	A	High	03/08/2021	3	Another hospital	44	TRUE		1	Ward/Room	1
Epimed Monitor	General/Mixed	False	H1654	two	Public	Brazil	AGE2182	13	69560bf5-6a35-4bc5-8d31-900a7a6a8128	333515	69	F				01/26/2021	23:00	False	False	False			D	Death	02/07/2021	02:20		Uninformed	7	Death	No		7	12			TRUE	01/19/2021	D	Death	02/07/2021	5	Death	19	TRUE		1	Ward/Room	1
Epimed Monitor	General/Mixed	False	H1654	two	Public	Brazil	AGE2182	13	911af655-0df1-465e-a2d7-da264a01f530	1652821	58	M				01/28/2021	17:00	False	False	False			D	Death	02/15/2021	17:10		Uninformed	7	Death	No		3	18			TRUE	01/25/2021	D	Death	02/15/2021	5	Death	21	TRUE		6	Transfer from another hospital/institution	1
Epimed Monitor	General/Mixed	False	H1654	two	Public	Brazil	AGE2182	13	d5b076b6-149d-47f3-b1f0-3658334a8ffe	1653109	72	M	75	160	29.3	01/30/2021	16:16	False	False	False			D	Death	02/03/2021	07:30		Uninformed	7	Death	No		2	4			TRUE	01/28/2021	D	Death	02/03/2021	5	Death	6	TRUE	SUS (Unified Health System)	1	Ward/Room	1
Epimed Monitor	General/Mixed	False	H1654	two	Public	Brazil	AGE2182	13	660dde18-e47a-46ad-aa61-5f20ff1c3506	1653401	58	M				02/01/2021	19:30	False	False	False			A	High	02/17/2021	17:00	6	Waiting for family	1	Ward or room	No		0	16			TRUE	02/01/2021	A	High	02/28/2021	1	Residence	27	TRUE		6	Transfer from another hospital/institution	1
Epimed Monitor	General/Mixed	False	H1654	two	Public	Brazil	AGE2182	13	3abe76ec-a9cb-4197-bc9c-d63f8b9b84f1	1001451	64	M				02/04/2021	11:30	False	False	False			D	Death	02/10/2021	13:37		Uninformed	7	Death	No		6	6			TRUE	01/29/2021	D	Death	02/10/2021	5	Death	12	TRUE		1	Ward/Room	1
Epimed Monitor	General/Mixed	False	H1654	two	Public	Brazil	AGE2182	13	6365ec3a-bc7f-4750-a203-543307ff9a2f	1653457	46	M	85	170	29.4	02/05/2021	12:58	False	False	False			A	High	02/17/2021	17:00	7	Waiting for family	1	Ward or room	No		3	12			TRUE	02/02/2021	D	Death	03/04/2021	5	Death	30	TRUE	SUS (Unified Health System)	1	Ward/Room	1
Epimed Monitor	General/Mixed	False	H1654	two	Public	Brazil	AGE2182	13	8fead10c-104c-4f23-b6e3-ad382b1b1199	1653978	55	M	120	180	37	02/07/2021	15:20	False	False	False			D	Death	02/13/2021	21:04		Uninformed	7	Death	No		0	6			TRUE	02/07/2021	D	Death	02/13/2021	5	Death	6	TRUE		6	Transfer from another hospital/institution	1
Epimed Monitor	General/Mixed	False	H1654	two	Public	Brazil	AGE2182	13	9f20159a-dc6c-4735-9364-3c7ecbfed965	1653986	86	M				02/07/2021	18:20	False	False	False			A	High	02/09/2021	15:21	0	Uninformed	1	Ward or room	No		0	2			TRUE	02/07/2021	A	High	02/12/2021	1	Residence	5	TRUE		2	Emergency	1
Epimed Monitor	General/Mixed	False	H1654	two	Public	Brazil	AGE2182	13	2da33bfe-7b0f-40cf-9642-624dfd4cdc57	1653994	38	M				02/07/2021	22:59	False	False	False			D	Death	02/14/2021	02:55		Uninformed	7	Death	No		0	7			TRUE	02/07/2021	D	Death	02/14/2021	5	Death	7	TRUE		6	Transfer from another hospital/institution	1
Epimed Monitor	General/Mixed	False	H1654	two	Public	Brazil	AGE2182	13	e5432535-97fe-477b-bc48-c6275a4e798a	1654249	59	M				02/09/2021	22:00	False	False	False			D	Death	02/17/2021	02:25		Uninformed	7	Death	No		0	8			TRUE	02/09/2021	D	Death	02/17/2021	5	Death	8	TRUE		6	Transfer from another hospital/institution	1
Epimed Monitor	General/Mixed	False	H1654	two	Public	Brazil	AGE2182	13	7d272dc1-359e-40c0-b6e8-4eb0d164f946	1654128	39	M				02/10/2021	12:00 pm	False	False	False			D	Death	03/01/2021	19:50		Uninformed	7	Death	No		2	19			TRUE	02/08/2021	D	Death	03/01/2021	5	Death	21	TRUE		1	Ward/Room	1
Epimed Monitor	General/Mixed	False	H1654	two	Public	Brazil	AGE2182	13	30aaedab-a1b5-4f76-95b5-2ec623930762	1654410	73	M				02/10/2021	22:00	False	False	False			A	High	02/15/2021	12:30	3	Uninformed	1	Ward or room	No		0	5			TRUE	02/10/2021	A	High	03/02/2021	3	Another hospital	20	TRUE		6	Transfer from another hospital/institution	1
Epimed Monitor	General/Mixed	False	H1654	two	Public	Brazil	AGE2182	13	6fd65ee4-0c89-4e22-957c-513cb7c1d161	1654721	45	M				02/12/2021	21:00	False	False	False			D	Death	02/26/2021	quarter past eleven		Uninformed	7	Death	No		0	14			TRUE	02/12/2021	D	Death	02/26/2021	5	Death	14	TRUE		6	Transfer from another hospital/institution	1
Epimed Monitor	General/Mixed	False	H1654	two	Public	Brazil	AGE2182	13	9dcd2059-fb48-4d57-ba23-16a79808eb33	1654751	44	M	90	180	27.8	02/14/2021	16:06	False	False	False	B34.2	Coronavirus infection of unspecified location	A	High	02/21/2021	14:55	4	Uninformed	1	Ward or room	No		0	7			TRUE	02/14/2021	A	High	02/23/2021	1	Residence	9	TRUE	SUS (Unified Health System)	6	Transfer from another hospital/institution	1
Epimed Monitor	General/Mixed	False	H1654	two	Public	Brazil	AGE2182	13	d94c7161-41ea-49a9-9aa1-7b05f5a86768	1654814	80	M				02/15/2021	13:00	False	False	False	B34.8	Other virus infections of unspecified location	D	Death	02/19/2021	21:15		Uninformed	7	Death	No		0	4			TRUE	02/15/2021	D	Death	02/19/2021	5	Death	4	TRUE		6	Transfer from another hospital/institution	1
Epimed Monitor	General/Mixed	False	H1654	two	Public	Brazil	AGE2182	13	132ae3a2-910a-473d-955c-15a0bd657ad1	10441	72	M	90			02/15/2021	22:00	False	False	False			D	Death	03/13/2021	11:00		Uninformed	7	Death	No		0	26			TRUE	02/15/2021	D	Death	03/13/2021	5	Death	26	TRUE	SUS (Unified Health System)	6	Transfer from another hospital/institution	1
Epimed Monitor	General/Mixed	False	H1654	two	Public	Brazil	AGE2182	13	30aaedab-a1b5-4f76-95b5-2ec623930762	1654410	73	M				02/16/2021	11:20	TRUE	TRUE	TRUE			A	High	03/02/2021	10:00 am	0	Uninformed	4	Another hospital	No		6	14			TRUE	02/10/2021	A	High	03/02/2021	3	Another hospital	20	TRUE		1	Ward/Room	1
Epimed Monitor	General/Mixed	False	H1654	two	Public	Brazil	AGE2182	13	33f9e4b3-0918-47ff-b570-19d701d3ac49	32166	23	M				02/17/2021	19:13	False	False	False			D	Death	02/22/2021	04:17		Uninformed	7	Death	No		3	5			TRUE	02/14/2021	D	Death	02/22/2021	5	Death	8	TRUE	SUS (Unified Health System)	1	Ward/Room	1
Epimed Monitor	General/Mixed	False	H1654	two	Public	Brazil	AGE2182	13	744c22c2-ebb1-4998-ae14-ca07c8d6aa2b	1655303	55	M	98			02/19/2021	14:30	False	False	False			D	Death	02/25/2021	11:25		Uninformed	7	Death	No		1	6			TRUE	02/18/2021	D	Death	02/25/2021	5	Death	7	TRUE		1	Ward/Room	1
Epimed Monitor	General/Mixed	False	H1654	two	Public	Brazil	AGE2182	13	aac27a13-ba9f-443e-8140-c61ba6546017	1655530	80	F	85	170	29.4	02/20/2021	15:07	False	False	False			D	Death	02/27/2021	17:00		Uninformed	7	Death	No		0	7			TRUE	02/20/2021	D	Death	02/27/2021	5	Death	7	TRUE	SUS (Unified Health System)	6	Transfer from another hospital/institution	1
Epimed Monitor	General/Mixed	False	H1654	two	Public	Brazil	AGE2182	13	9cc46131-661a-4314-8671-f49e1d3344e0	264871	48	M				02/21/2021	10:05	False	False	False			A	High	03/12/2021	4:00 pm	3	Uninformed	1	Ward or room	No		2	19			TRUE	02/19/2021	D	Death	03/18/2021	5	Death	27	TRUE	SUS (Unified Health System)	1	Ward/Room	1
Epimed Monitor	General/Mixed	False	H1654	two	Public	Brazil	AGE2182	13	d5400236-a447-4c04-8863-07ab9bdba63f	1110423	46	M				02/21/2021	11:00	False	False	False			D	Death	03/22/2021	01:55		Uninformed	7	Death	No		0	29			TRUE	02/21/2021	D	Death	03/22/2021	5	Death	29	TRUE	SUS (Unified Health System)	6	Transfer from another hospital/institution	1
Epimed Monitor	General/Mixed	False	H1654	two	Public	Brazil	AGE2182	13	50d68562-2879-4a97-a999-cb68d0403552	92342	43	F				02/26/2021	00:15	False	False	False			D	Death	03/14/2021	23:38		Uninformed	7	Death	No		0	16			TRUE	02/26/2021	D	Death	03/14/2021	5	Death	16	TRUE		6	Transfer from another hospital/institution	1
Epimed Monitor	General/Mixed	False	H1654	two	Public	Brazil	AGE2182	13	88e40869-e774-4f7a-a629-2985bc4edd91	1656275	47	M	80	175	26.1	02/26/2021	16:44	False	False	False			D	Death	03/02/2021	02:50		Uninformed	7	Death	No		0	4			TRUE	02/26/2021	D	Death	03/02/2021	5	Death	4	TRUE	SUS (Unified Health System)	6	Transfer from another hospital/institution	1
Epimed Monitor	General/Mixed	False	H1654	two	Public	Brazil	AGE2182	13	586a0f4c-875c-4862-b6f9-8dae7e650408	72931	54	M				02/26/2021	22:30	False	False	False			D	Death	03/16/2021	8 o'clock		Uninformed	7	Death	No		0	18			TRUE	02/26/2021	D	Death	03/16/2021	5	Death	18	TRUE		2	Emergency	1
Epimed Monitor	General/Mixed	False	H1654	two	Public	Brazil	AGE2182	13	53db81b7-c54f-4c4d-9753-706a0c4e4074	1656309	68	M				02/27/2021	18:00	False	False	False			D	Death	03/01/2021	22:15		Uninformed	7	Death	No		0	2			TRUE	02/27/2021	D	Death	03/01/2021	5	Death	2	TRUE		6	Transfer from another hospital/institution	1
Epimed Monitor	General/Mixed	False	H1654	two	Public	Brazil	AGE2182	13	550541a5-e6e8-4551-a5ea-889e4fc4edaf	1655843	81	M				02/27/2021	21:30	False	False	False			D	Death	03/01/2021	07:40		Uninformed	7	Death	No		4	2			TRUE	02/23/2021	D	Death	03/01/2021	5	Death	6	TRUE		1	Ward/Room	1
Epimed Monitor	General/Mixed	False	H1654	two	Public	Brazil	AGE2182	13	e80bcd44-eb1c-488d-8a60-d271fed3ed7e	48506	44	M	160	175	52.2	02/28/2021	01:25	False	False	False			D	Death	03/06/2021	01:34		Uninformed	7	Death	No		2	6			TRUE	02/26/2021	D	Death	03/06/2021	5	Death	8	TRUE	SUS (Unified Health System)	1	Ward/Room	1
Epimed Monitor	General/Mixed	False	H1654	two	Public	Brazil	AGE2182	13	12030b88-76d1-4955-98af-55e140dc9ea8	228617	57	F	152			02/28/2021	11:40	False	False	False			D	Death	03/20/2021	01:30		Uninformed	7	Death	No		2	20			TRUE	02/26/2021	D	Death	03/20/2021	5	Death	22	TRUE		1	Ward/Room	1
Epimed Monitor	General/Mixed	False	H1654	two	Public	Brazil	AGE2182	13	3dae5028-11e3-4ec4-be17-b5e33558f933	1111463	32	M				03/02/2021	11:40	False	False	False			D	Death	03/14/2021	14:00		Uninformed	7	Death	No		0	12			TRUE	03/02/2021	D	Death	03/14/2021	5	Death	12	TRUE		2	Emergency	1
Epimed Monitor	General/Mixed	False	H1654	two	Public	Brazil	AGE2182	13	6e028b6c-a309-4ec3-a362-6ff967208c9a	1656328	43	M				03/02/2021	14:40	False	False	False			D	Death	03/08/2021	05:40		Uninformed	7	Death	No		2	6			TRUE	02/28/2021	D	Death	03/08/2021	5	Death	8	TRUE	SUS (Unified Health System)	1	Ward/Room	1
Epimed Monitor	General/Mixed	False	H1654	two	Public	Brazil	AGE2182	13	934152ac-7008-4260-8218-1338dcee76f0	1656577	57	M				03/02/2021	15:00	False	False	False			D	Death	03/07/2021	15:00		Uninformed	7	Death	No		0	5			TRUE	03/02/2021	D	Death	03/07/2021	5	Death	5	TRUE		2	Emergency	1
Epimed Monitor	General/Mixed	False	H1654	two	Public	Brazil	AGE2182	13	087a57f2-f872-4b43-a0da-ebfb7a6e8665	292562	68	F				03/03/2021	12:00 pm	False	False	False			D	Death	03/14/2021	8:00 pm		Uninformed	7	Death	No		5	11			TRUE	02/26/2021	D	Death	03/14/2021	5	Death	16	TRUE		2	Emergency	1
Epimed Monitor	General/Mixed	False	H1654	two	Public	Brazil	AGE2182	13	5dcbde6c-a447-46a8-9cf4-a71acb3e76cf	145751	21	M				03/04/2021	13:00	False	False	False			A	High	03/30/2021	14:05	3	Uninformed	1	Ward or room	No		0	26			TRUE	03/04/2021	A	High	04/01/2021	1	Residence	28	TRUE		2	Emergency	1
Epimed Monitor	General/Mixed	False	H1654	two	Public	Brazil	AGE2182	13	0536e8d9-bf80-4260-92f3-c8a1561b1177	52090	75	M				03/06/2021	11:00	False	False	False			D	Death	03/16/2021	11:55		Uninformed	7	Death	No		2	10			TRUE	03/04/2021	D	Death	03/16/2021	5	Death	12	TRUE		1	Ward/Room	1
Epimed Monitor	General/Mixed	False	H1654	two	Public	Brazil	AGE2182	13	58bdf394-fdab-49db-a575-2b3c5e6c4adc	42786	54	F				03/06/2021	11:30	False	False	False			D	Death	04/16/2021	14:00		Uninformed	7	Death	No		2	41			TRUE	03/04/2021	D	Death	04/16/2021	5	Death	43	TRUE		1	Ward/Room	1
Epimed Monitor	General/Mixed	False	H1654	two	Public	Brazil	AGE2182	13	1cf20514-51bb-4e12-a27d-7b4f78eb9fc5	25387	68	F				03/07/2021	12:00 pm	False	False	False			D	Death	03/29/2021	8:00 pm		Uninformed	7	Death	No		0	22			TRUE	03/07/2021	D	Death	03/29/2021	5	Death	22	TRUE		1	Ward/Room	1
Epimed Monitor	General/Mixed	TRUE	H1654	two	Public	Brazil	AGE2182	13	4e2524fe-8aad-4a70-b004-c136d5940f24	1656909	49	M				03/07/2021	14:00	False	False	False			D	Death	03/07/2021	15:35		Uninformed	7	Death	No		0	1			TRUE	03/07/2021	D	Death	03/07/2021	5	Death	1	TRUE		2	Emergency	1
Epimed Monitor	General/Mixed	False	H1654	two	Public	Brazil	AGE2182	13	c5276331-494e-43a1-8e38-4736d8002039	306371	66	F				03/08/2021	12:00 pm	False	False	False			D	Death	03/30/2021	13:30		Uninformed	7	Death	No		0	22			TRUE	03/08/2021	D	Death	03/30/2021	5	Death	22	TRUE		2	Emergency	1
Epimed Monitor	General/Mixed	False	H1654	two	Public	Brazil	AGE2182	13	de26cc83-4826-4fad-b6b5-d3c612a30482	186686	55	F				03/12/2021	21:00	False	False	False			D	Death	03/18/2021	10:25		Uninformed	7	Death	No		0	6			TRUE	03/12/2021	D	Death	03/18/2021	5	Death	6	TRUE		2	Emergency	1
Epimed Monitor	General/Mixed	False	H1654	two	Public	Brazil	AGE2182	13	c0874f8e-46bf-49b5-a98b-fbc1c3531192	1657418	41	M				03/13/2021	21:00	False	False	False			A	High	03/27/2021	12:08	0	Uninformed	3	Another hospital ICU/ICU	No		0	14			TRUE	03/13/2021	D	Death	03/31/2021	5	Death	18	TRUE		2	Emergency	1
Epimed Monitor	General/Mixed	False	H1654	two	Public	Brazil	AGE2182	13	e00d3a6d-1bdf-4064-8e9e-f1c42da33dec	1657445	43	M	100	175	32.7	03/14/2021	22:49	False	False	False			D	Death	03/20/2021	05:30		Uninformed	7	Death	No		0	6			TRUE	03/14/2021	D	Death	03/20/2021	5	Death	6	TRUE	SUS (Unified Health System)	6	Transfer from another hospital/institution	1
Epimed Monitor	General/Mixed	False	H1654	two	Public	Brazil	AGE2182	13	999720ac-cfa3-490c-b4d9-8955c4601832	1657473	58	M				03/15/2021	00:50	False	False	False			D	Death	03/23/2021	09:25		Uninformed	7	Death	No		0	8			TRUE	03/15/2021	D	Death	03/23/2021	5	Death	8	TRUE		6	Transfer from another hospital/institution	1
Epimed Monitor	General/Mixed	False	H1654	two	Public	Brazil	AGE2182	13	e73e5df4-bc3c-4412-8239-3397908ae0f6	1657538	70	M				03/15/2021	12:40	False	False	False			D	Death	03/17/2021	11:50		Uninformed	7	Death	No		0	2			TRUE	03/15/2021	D	Death	03/17/2021	5	Death	2	TRUE	SUS (Unified Health System)	2	Emergency	1
Epimed Monitor	General/Mixed	False	H1654	two	Public	Brazil	AGE2182	13	c71c81c7-3f0a-4dae-b994-457f1ff47f2d	1657767	47	F	80	165	29.4	03/16/2021	16:33	False	False	False			D	Death	03/28/2021	15:04		Uninformed	7	Death	No		0	12			TRUE	03/16/2021	D	Death	03/28/2021	5	Death	12	TRUE	SUS (Unified Health System)	2	Emergency	1
Epimed Monitor	General/Mixed	False	H1654	two	Public	Brazil	AGE2182	13	f68cb4b0-03d5-439e-9191-d177226b094c	1657778	30	M				03/16/2021	20:58	False	False	False			D	Death	03/20/2021	21:30		Uninformed	7	Death	No		0	4			TRUE	03/16/2021	D	Death	03/20/2021	5	Death	4	TRUE		2	Emergency	1
Epimed Monitor	General/Mixed	False	H1654	two	Public	Brazil	AGE2182	13	95134bb1-5bae-4481-b9da-bfb73132cdac	1657791	68	M				03/17/2021	00:20	False	False	False			D	Death	03/23/2021	08:10		Uninformed	7	Death	No		0	6			TRUE	03/17/2021	D	Death	03/23/2021	5	Death	6	TRUE		1	Ward/Room	1
Epimed Monitor	General/Mixed	False	H1654	two	Public	Brazil	AGE2182	13	9802cf92-a9ae-4d39-80fc-f5e556c6729b	1658041	61	M				03/19/2021	00:05	False	False	False			D	Death	03/23/2021	12:20		Uninformed	7	Death	No		0	4			TRUE	03/19/2021	D	Death	03/23/2021	5	Death	4	TRUE		1	Ward/Room	1
Epimed Monitor	General/Mixed	False	H1654	two	Public	Brazil	AGE2182	13	621a401d-a89e-41ad-9cfd-e01346b1a3c1	1658169	58	F				03/19/2021	21:00	False	False	False			A	High	04/12/2021	13:15	2	Uninformed	1	Ward or room	No		0	24			TRUE	03/19/2021	A	High	04/20/2021	1	Residence	32	TRUE	SUS (Unified Health System)	1	Ward/Room	1
Epimed Monitor	General/Mixed	False	H1654	two	Public	Brazil	AGE2182	13	390f0a86-6323-44af-9bc5-b552ee5f60d7	1657783	84	M				03/19/2021	21:15	False	False	False			D	Death	03/21/2021	19:30		Uninformed	7	Death	No		3	2			TRUE	03/16/2021	D	Death	03/21/2021	5	Death	5	TRUE		1	Ward/Room	1
Epimed Monitor	General/Mixed	False	H1654	two	Public	Brazil	AGE2182	13	b9f45de1-2ed3-4801-b5f2-a3732ac80a05	1657626	67	F				03/20/2021	14:20	False	False	False			D	Death	04/12/2021	17:25		Uninformed	7	Death	No		5	23			TRUE	03/15/2021	D	Death	04/12/2021	5	Death	28	TRUE		1	Ward/Room	1
Epimed Monitor	General/Mixed	False	H1654	two	Public	Brazil	AGE2182	13	f8140285-b4fb-4138-a554-db9a9fa6947b	1658204	59	M				03/20/2021	20:10	False	False	False			D	Death	03/21/2021	22:15		Uninformed	7	Death	No		0	1			TRUE	03/20/2021	D	Death	03/21/2021	5	Death	1	TRUE		2	Emergency	1
Epimed Monitor	General/Mixed	False	H1654	two	Public	Brazil	AGE2182	13	1cbc6fee-7e44-4f78-b3b9-4ca67360fde1	1658337	60	F	80	160	31.2	03/22/2021	13:42	False	False	False			D	Death	04/03/2021	09:40		Uninformed	7	Death	No		0	12			TRUE	03/22/2021	D	Death	04/03/2021	5	Death	12	TRUE	SUS (Unified Health System)	6	Transfer from another hospital/institution	1
Epimed Monitor	General/Mixed	False	H1654	two	Public	Brazil	AGE2182	13	eb71ff8b-72b8-46b3-a6d8-1de014b7a675	1658259	51	F				03/23/2021	14:30	False	False	False			D	Death	03/29/2021	06:15		Uninformed	7	Death	No		2	6			TRUE	03/21/2021	D	Death	03/29/2021	5	Death	8	TRUE		1	Ward/Room	1
Epimed Monitor	General/Mixed	False	H1654	two	Public	Brazil	AGE2182	13	72f3a624-6077-4064-bcf1-6583c2992bf2	1658428	70	F				03/23/2021	16:30	False	False	False			D	Death	04/16/2021	12:33		Uninformed	7	Death	No		1	24			TRUE	03/22/2021	D	Death	04/16/2021	5	Death	25	TRUE		1	Ward/Room	1
Epimed Monitor	General/Mixed	False	H1654	two	Public	Brazil	AGE2182	13	59270aa3-c730-4198-b177-b66e18ff9015	1658387	72	M				03/23/2021	17:30	False	False	False			D	Death	03/31/2021	20:20		Uninformed	7	Death	No		1	8			TRUE	03/22/2021	D	Death	03/31/2021	5	Death	9	TRUE	SUS (Unified Health System)	1	Ward/Room	1
Epimed Monitor	General/Mixed	False	H1654	two	Public	Brazil	AGE2182	13	3d8e6fce-6e22-4cf2-abd0-cd8b4d31c750	1658713	58	F				03/26/2021	8 o'clock	False	False	False			D	Death	03/26/2021	15:25		Uninformed	7	Death	No		2	1			TRUE	03/24/2021	D	Death	03/26/2021	5	Death	2	TRUE	SUS (Unified Health System)	1	Ward/Room	1
Epimed Monitor	General/Mixed	False	H1654	two	Public	Brazil	AGE2182	13	3fc4ea20-9ae6-466f-b8fa-fb8686ecd006	1658819	60	M				03/27/2021	16:31	False	False	False			D	Death	03/29/2021	00:20		Uninformed	7	Death	No		2	2			TRUE	03/25/2021	D	Death	03/29/2021	5	Death	4	TRUE	SUS (Unified Health System)	1	Ward/Room	1
Epimed Monitor	General/Mixed	False	H1654	two	Public	Brazil	AGE2182	13	3386f50b-6aa5-419e-9183-ebcff105a4d9	1657899	51	M				03/27/2021	22:30	False	False	False			D	Death	04/03/2021	18:50		Uninformed	7	Death	No		10	7			TRUE	03/17/2021	D	Death	04/03/2021	5	Death	17	TRUE		1	Ward/Room	1
Epimed Monitor	General/Mixed	False	H1654	two	Public	Brazil	AGE2182	13	8e33eb68-f0d5-4197-8657-2bbd7eb4b830	1659244	53	F				03/29/2021	16:46	False	False	False			D	Death	04/13/2021	18:45		Uninformed	7	Death	No		0	15			TRUE	03/29/2021	D	Death	04/13/2021	5	Death	15	TRUE		6	Transfer from another hospital/institution	1
Epimed Monitor	General/Mixed	False	H1654	two	Public	Brazil	AGE2182	13	e035c233-8034-4596-b810-500a85affa7a	1659253	53	M				03/29/2021	18:07	False	False	False			D	Death	04/18/2021	02:10		Uninformed	7	Death	Yeah, don't step up	2021-04-16	0	20	18		TRUE	03/29/2021	D	Death	04/18/2021	5	Death	20	TRUE	SUS (Unified Health System)	6	Transfer from another hospital/institution	1
Epimed Monitor	General/Mixed	False	H1654	two	Public	Brazil	AGE2182	13	4472c21f-f21f-4103-ac32-e1def678c3fe	1658683	68	F				03/29/2021	21:30	False	False	False			D	Death	03/30/2021	23:50		Uninformed	7	Death	No		5	1			TRUE	03/24/2021	D	Death	03/30/2021	5	Death	6	TRUE	SUS (Unified Health System)	1	Ward/Room	1
Epimed Monitor	General/Mixed	False	H1654	two	Public	Brazil	AGE2182	13	3ba69feb-0d4c-4566-9278-d71dbd96ff4a	1613868	81	M				03/29/2021	23:30	False	False	False			D	Death	03/30/2021	07:20		Uninformed	7	Death	No		2	1			TRUE	03/27/2021	D	Death	03/30/2021	5	Death	3	TRUE		1	Ward/Room	1
Epimed Monitor	General/Mixed	False	H1654	two	Public	Brazil	AGE2182	13	7fe9d391-5b06-4a9d-ba49-b000237043b7	1658008	40	M				03/30/2021	13:51	False	False	False			D	Death	04/18/2021	13:39		Uninformed	7	Death	No		0	19			TRUE	03/30/2021	D	Death	04/18/2021	5	Death	19	TRUE		6	Transfer from another hospital/institution	1
Epimed Monitor	General/Mixed	False	H1654	two	Public	Brazil	AGE2182	13	f5085381-b16f-4c7e-ab62-2818c77583f7	1659459	54	M	100	180	30.9	03/31/2021	10:51	False	False	False			D	Death	04/02/2021	09:40		Uninformed	7	Death	No		0	2			TRUE	03/31/2021	D	Death	04/02/2021	5	Death	2	TRUE	SUS (Unified Health System)	2	Emergency	1
Epimed Monitor	General/Mixed	False	H1654	two	Public	Brazil	AGE2182	13	48e7d69c-0c57-4a7a-b370-e5f635987cd0	1659089	56	F				03/31/2021	11:44	False	False	False			D	Death	04/26/2021	19:45		Uninformed	7	Death	No		1	26			TRUE	03/30/2021	D	Death	04/26/2021	5	Death	27	TRUE		1	Ward/Room	1
Epimed Monitor	General/Mixed	False	H1654	two	Public	Brazil	AGE2182	13	886bf9f6-553f-4c4a-a78d-f132cf36c6db	1659080	69	M	75	180	23.1	03/31/2021	11:51	False	False	False			D	Death	04/13/2021	01:15		Uninformed	7	Death	No		3	13			TRUE	03/28/2021	D	Death	04/13/2021	5	Death	16	TRUE	SUS (Unified Health System)	1	Ward/Room	1
Epimed Monitor	General/Mixed	False	H1654	two	Public	Brazil	AGE2182	13	47b1e1bf-d5b4-42be-81a8-c3081f69375e	1657760	61	M				04/01/2021	11:35	False	False	False			D	Death	04/18/2021	02:40		Uninformed	7	Death	No		16	17			TRUE	03/16/2021	D	Death	04/18/2021	5	Death	33	TRUE	SUS (Unified Health System)	4	Another ICU/ICU in your hospital	1
Epimed Monitor	General/Mixed	False	H1654	two	Public	Brazil	AGE2182	13	4df7cf63-6c9d-4f4f-9eb0-9129166ef40b	1659651	49	M				04/02/2021	21:20	False	False	False			D	Death	05/09/2021	08:27		Uninformed	7	Death	No		1	37			TRUE	04/01/2021	D	Death	05/09/2021	5	Death	38	TRUE		1	Ward/Room	1
Epimed Monitor	General/Mixed	False	H1654	two	Public	Brazil	AGE2182	13	727d28f3-113a-454d-aa39-720309e61e1d	1659780	29	F				04/03/2021	21:30	False	False	False			D	Death	04/26/2021	06:00		Uninformed	7	Death	No		0	23			TRUE	04/03/2021	D	Death	04/26/2021	5	Death	23	TRUE		6	Transfer from another hospital/institution	1
Epimed Monitor	General/Mixed	False	H1654	two	Public	Brazil	AGE2182	13	ff63e9c9-183f-43a4-a6ae-210993d0e4e3	1659926	61	M				04/05/2021	13:30	False	False	False			A	High	04/12/2021	13:15	2	Uninformed	1	Ward or room	No		0	7			TRUE	04/05/2021	A	High	05/11/2021	1	Residence	36	TRUE		6	Transfer from another hospital/institution	1
Epimed Monitor	General/Mixed	False	H1654	two	Public	Brazil	AGE2182	13	0e2b29d7-73a1-4f77-a456-bdbd7859c908	1555463	74	M	60	160	23.4	04/12/2021	17:39	False	False	False			D	Death	04/18/2021	21:50		Uninformed	7	Death	No		3	6			TRUE	04/09/2021	D	Death	04/18/2021	5	Death	9	TRUE	SUS (Unified Health System)	1	Ward/Room	1
Epimed Monitor	General/Mixed	False	H1654	two	Public	Brazil	AGE2182	13	ced4156a-57ea-4285-aa64-7f203c9cbc30	1660935	25	M				04/12/2021	21:00	False	False	False			A	High	05/01/2021	14:46	5	Waiting for family	1	Ward or room	No		0	19			TRUE	04/12/2021	A	High	05/07/2021	1	Residence	25	TRUE	SUS (Unified Health System)	6	Transfer from another hospital/institution	1
Epimed Monitor	General/Mixed	False	H1654	two	Public	Brazil	AGE2182	13	f2443c36-0931-4563-a64d-11debe529e5f	169534	39	F				04/13/2021	00:30	False	False	False			D	Death	05/12/2021	11:30		Uninformed	7	Death	No		3	29			TRUE	04/10/2021	D	Death	05/12/2021	5	Death	32	TRUE	SUS (Unified Health System)	1	Ward/Room	1
Epimed Monitor	General/Mixed	False	H1654	two	Public	Brazil	AGE2182	13	1eda68ed-b274-48cf-887d-9111b9ef53d0	1660338	32	F				04/13/2021	15:26	False	False	False			A	High	04/19/2021	16:30	6	No bed availability in the destination unit	1	Ward or room	No		6	6			TRUE	04/07/2021	A	High	04/23/2021	1	Residence	16	TRUE		4	Another ICU/ICU in your hospital	1
Epimed Monitor	General/Mixed	False	H1654	two	Public	Brazil	AGE2182	13	b877a897-5fa8-4207-8017-0bd96ea5f0d5	1660727	69	F				04/14/2021	15:20	False	False	False			D	Death	04/27/2021	06:35		Uninformed	7	Death	No		4	13			TRUE	04/10/2021	D	Death	04/27/2021	5	Death	17	TRUE	SUS (Unified Health System)	1	Ward/Room	1
Epimed Monitor	General/Mixed	False	H1654	two	Public	Brazil	AGE2182	13	e56e6def-8f93-48cd-ab37-ca7b037f0d97	1659516	25	M	145	173	48.4	04/16/2021	12:30	False	False	False			A	High	05/12/2021	18:44	0	Uninformed	1	Ward or room	No		16	26			TRUE	03/31/2021	A	High	05/24/2021	1	Residence	54	TRUE	SUS (Unified Health System)	4	Another ICU/ICU in your hospital	1
Epimed Monitor	General/Mixed	False	H1654	two	Public	Brazil	AGE2182	13	1f5c5221-2cf1-4e1e-a6c2-fcec37813a59	1661645	74	F				04/16/2021	21:28	False	False	False			A	High	04/19/2021	15:00	5	No bed availability in the destination unit	1	Ward or room	No		0	3			TRUE	04/16/2021	A	High	04/30/2021	1	Residence	14	TRUE		2	Emergency	1
Epimed Monitor	General/Mixed	False	H1654	two	Public	Brazil	AGE2182	13	50d748e8-ba52-4015-a127-b64b85fe6e90	1661502	35	F	85	160	33.2	04/18/2021	17:43	False	False	False			A	High	05/05/2021	14:00	4	Uninformed	1	Ward or room	No		3	17			TRUE	04/15/2021	A	High	05/09/2021	1	Residence	24	TRUE	SUS (Unified Health System)	1	Ward/Room	1
Epimed Monitor	General/Mixed	False	H1654	two	Public	Brazil	AGE2182	13	7257c3c2-120b-4f9d-804b-b24c9f5d3025	1661814	64	M				04/19/2021	12:00 pm	False	False	False			A	High	04/23/2021	4:00 pm	5	No bed availability in the destination unit	1	Ward or room	No		0	4			TRUE	04/19/2021	A	High	05/01/2021	1	Residence	12	TRUE		6	Transfer from another hospital/institution	1
Epimed Monitor	General/Mixed	False	H1654	two	Public	Brazil	AGE2182	13	cab725d9-c74f-4ec0-907f-1a04cd1882b8	16073	74	F	65	150	28.9	04/19/2021	20:37	False	False	False			D	Death	04/23/2021	22:00		Uninformed	7	Death	No		1	4			TRUE	04/18/2021	D	Death	04/23/2021	5	Death	5	TRUE	SUS (Unified Health System)	1	Ward/Room	1
Epimed Monitor	General/Mixed	False	H1654	two	Public	Brazil	AGE2182	13	44ac0aa4-0b75-41fa-8e7e-56452ba71761	1662015	52	M	80	170	27.7	04/20/2021	00:20	False	False	False			A	High	04/25/2021	13:00	3	Uninformed	1	Ward or room	No		0	5			TRUE	04/20/2021	A	High	05/03/2021	1	Residence	13	TRUE	SUS (Unified Health System)	2	Emergency	1
Epimed Monitor	General/Mixed	False	H1654	two	Public	Brazil	AGE2182	13	26f95d38-addf-40fe-9579-20e86e2be754	1661668	62	M	75	160	29.3	04/20/2021	01:22	False	False	False			A	High	05/16/2021	09:00	1	Uninformed	1	Ward or room	No		0	26			TRUE	04/20/2021	A	High	05/22/2021	1	Residence	32	TRUE	SUS (Unified Health System)	1	Ward/Room	1
Epimed Monitor	General/Mixed	False	H1654	two	Public	Brazil	AGE2182	13	4dc72412-930a-4b92-95d4-3ff0f13e004c	1662010	56	M	75	160	29.3	04/20/2021	23:13	False	False	False			D	Death	05/17/2021	21:40		Uninformed	7	Death	No		0	27			TRUE	04/20/2021	D	Death	05/17/2021	5	Death	27	TRUE	SUS (Unified Health System)	6	Transfer from another hospital/institution	1
Epimed Monitor	General/Mixed	False	H1654	two	Public	Brazil	AGE2182	13	fc7881c8-1a67-4ecf-b8dd-60f10422c3fd	1661626	62	F				04/23/2021	21:50	False	False	False			D	Death	04/30/2021	11:50		Uninformed	7	Death	No		7	7			TRUE	04/16/2021	D	Death	04/30/2021	5	Death	14	TRUE		1	Ward/Room	1
Epimed Monitor	General/Mixed	False	H1654	two	Public	Brazil	AGE2182	13	c6be4bad-f0ff-45aa-a8bf-c98735107f8d	1662370	32	M				04/26/2021	10:20	False	False	False			D	Death	05/09/2021	22:35		Uninformed	7	Death	No		2	13			TRUE	04/24/2021	D	Death	05/09/2021	5	Death	15	TRUE	SUS (Unified Health System)	2	Emergency	1
Epimed Monitor	General/Mixed	False	H1654	two	Public	Brazil	AGE2182	13	087c2aef-af88-4d89-8619-34be41cfd3c6	1662449	38	F				04/26/2021	10:30	False	False	False			D	Death	05/23/2021	13:00		Uninformed	7	Death	No		5	27			TRUE	04/21/2021	D	Death	05/23/2021	5	Death	32	TRUE		6	Transfer from another hospital/institution	1
Epimed Monitor	General/Mixed	False	H1654	two	Public	Brazil	AGE2182	13	d8cf7ec0-3afd-4338-969e-4422fa257dd5	1662620	46	F				04/27/2021	00:20	False	False	False			A	High	05/13/2021	14:10	3	Uninformed	1	Ward or room	No		0	16			TRUE	04/27/2021	A	High	05/19/2021	1	Residence	22	TRUE	SUS (Unified Health System)	2	Emergency	1
Epimed Monitor	General/Mixed	False	H1654	two	Public	Brazil	AGE2182	13	e898e429-c322-47b7-8c88-80e4b2b1d493	1662926	62	F				04/28/2021	17:30	False	False	False			D	Death	05/04/2021	08:15		Uninformed	7	Death	No		0	6			TRUE	04/28/2021	D	Death	05/04/2021	5	Death	6	TRUE	SUS (Unified Health System)	6	Transfer from another hospital/institution	1
Epimed Monitor	General/Mixed	False	H1654	two	Public	Brazil	AGE2182	13	cf6f6d7e-23aa-46c9-a758-eedcd836dc9f	1663049	75	M				04/29/2021	15:10	False	False	False			A	High	05/04/2021	20:18			3	Another hospital ICU/ICU	No		0	5			TRUE	04/29/2021	A	High	05/10/2021	1	Residence	11	TRUE		6	Transfer from another hospital/institution	1
Epimed Monitor	General/Mixed	False	H1654	two	Public	Brazil	AGE2182	13	cb1ef24f-3932-463f-b76a-64b4fc13d32a	1662416	44	M	80	170	27.7	04/30/2021	18:49	False	False	False			D	Death	05/08/2021	15:13		Uninformed	7	Death	No		5	8			TRUE	04/25/2021	D	Death	05/08/2021	5	Death	13	TRUE	SUS (Unified Health System)	4	Another ICU/ICU in your hospital	1
Epimed Monitor	General/Mixed	False	H1654	two	Public	Brazil	AGE2182	13	c3d75d16-1486-4391-b725-e02dfb6eb369	1662654	67	M				05/01/2021	16:36	False	False	False			D	Death	05/07/2021	02:00		Uninformed	7	Death	No		4	6			TRUE	04/27/2021	D	Death	05/07/2021	5	Death	10	TRUE	SUS (Unified Health System)	1	Ward/Room	1
Epimed Monitor	General/Mixed	False	H1654	two	Public	Brazil	AGE2182	13	90678301-97af-4efd-87ae-b6ea728b2ad2	1663594	57	M				05/04/2021	15:00	False	False	False			D	Death	05/13/2021	22:50		Uninformed	7	Death	No		0	9			TRUE	05/04/2021	D	Death	05/13/2021	5	Death	9	TRUE	SUS (Unified Health System)	2	Emergency	1
Epimed Monitor	General/Mixed	False	H1654	two	Public	Brazil	AGE2182	13	191f6645-fff1-4c13-bd97-e2e6fdb9ddfd	1663131	36	M				05/04/2021	23:20	False	False	False			A	High	05/26/2021	18:00	1	Uninformed	1	Ward or room	No		0	22			TRUE	05/04/2021	A	High	06/02/2021	1	Residence	29	TRUE	SUS (Unified Health System)	2	Emergency	1
Epimed Monitor	General/Mixed	False	H1654	two	Public	Brazil	AGE2182	13	99ebb37f-91cf-4a59-a568-885aed05cddf	1662655	41	M				05/06/2021	00:14	False	False	False			A	High	05/20/2021	14:50	28	No bed availability in the destination unit	1	Ward or room	No		0	14			TRUE	05/06/2021	A	High	06/03/2021	1	Residence	28	TRUE	SUS (Unified Health System)	2	Emergency	1
Epimed Monitor	General/Mixed	False	H1654	two	Public	Brazil	AGE2182	13	a651157b-1c33-4e1b-a0f4-361bf29609c0	1663442	26	F				05/07/2021	14:30	False	False	False			A	High	05/13/2021	16:29	6	Other reasons	1	Ward or room	No		0	6			TRUE	05/07/2021	A	High	05/16/2021	1	Residence	9	TRUE		6	Transfer from another hospital/institution	1
Epimed Monitor	General/Mixed	False	H1654	two	Public	Brazil	AGE2182	13	dfab5a70-818b-4bcb-a168-9f41064acced	1663231	51	F				05/08/2021	22:30	False	False	False			A	High	05/25/2021	15:00	7	No bed availability in the destination unit	1	Ward or room	No		7	17			TRUE	05/01/2021	A	High	06/01/2021	1	Residence	31	TRUE		1	Ward/Room	1
Epimed Monitor	General/Mixed	False	H1654	two	Public	Brazil	AGE2182	13	479acf4f-b29e-4233-9143-960613bf0441	1664044	43	M	80	170	27.7	05/10/2021	12:37	False	False	False			A	High	05/14/2021	14:00	3	Uninformed	1	Ward or room	No		2	4			TRUE	05/08/2021	A	High	05/20/2021	1	Residence	12	TRUE	SUS (Unified Health System)	1	Ward/Room	1
Epimed Monitor	General/Mixed	False	H1654	two	Public	Brazil	AGE2182	13	63daa292-1075-4537-9c3c-1a467d7c65bd	1664012	66	M	80	174	26.4	05/10/2021	15:00	False	False	False			D	Death	05/28/2021	22:20		Uninformed	7	Death	No		0	18			TRUE	05/10/2021	D	Death	05/28/2021	5	Death	18	TRUE	SUS (Unified Health System)	4	Another ICU/ICU in your hospital	1
Epimed Monitor	General/Mixed	False	H1654	two	Public	Brazil	AGE2182	13	4e47923d-5b1f-4242-81e2-fe943278b9d9	1664509	50	M				05/12/2021	21:17	False	False	False			A	High	05/20/2021	14:00	4	Uninformed	1	Ward or room	No		0	8			TRUE	05/12/2021							False	SUS (Unified Health System)	2	Emergency	1
Epimed Monitor	General/Mixed	False	H1654	two	Public	Brazil	AGE2182	13	9bc1c6e8-6972-474a-8965-1b3e1fa07bd0	1664113	63	F				05/13/2021	10:20	False	False	False			A	High	05/23/2021	09:00	0	Uninformed			No		3	10			TRUE	05/10/2021	A	High	05/31/2021	1	Residence	21	TRUE		1	Ward/Room	1
Epimed Monitor	General/Mixed	False	H1654	two	Public	Brazil	AGE2182	13	2e368533-515d-451d-af1e-d31812c7c6b3	1664061	72	M				05/13/2021	4:00 pm	False	False	False			D	Death	05/20/2021	11:12		Uninformed	7	Death	No		5	7			TRUE	05/08/2021	D	Death	05/20/2021	5	Death	12	TRUE		1	Ward/Room	1
Epimed Monitor	General/Mixed	False	H1654	two	Public	Brazil	AGE2182	13	9b33437c-c577-4c02-9337-9281ad82d0da	1664730	64	M				05/13/2021	20:30	False	False	False			A	High	05/17/2021	18:00	3	Uninformed	1	Ward or room	No		0	4			TRUE	05/13/2021	A	High	05/20/2021	1	Residence	7	TRUE		6	Transfer from another hospital/institution	1
Epimed Monitor	General/Mixed	False	H1654	two	Public	Brazil	AGE2182	13	3a9d215c-0fe4-4a87-b5af-eb9635f6c7b8	1664487	60	M				05/14/2021	13:34	False	False	False			D	Death	06/08/2021	16:30		Uninformed	7	Death	No		2	25			TRUE	05/12/2021	D	Death	06/08/2021	5	Death	27	TRUE		1	Ward/Room	1
Epimed Monitor	General/Mixed	False	H1654	two	Public	Brazil	AGE2182	13	c345c2c5-311a-4689-80ee-daa41ceefce8	1664336	55	F	100	165	36.7	05/14/2021	14:00	False	False	False			D	Death	05/26/2021	00:59		Uninformed	7	Death	No		3	12			TRUE	05/11/2021	D	Death	05/26/2021	5	Death	15	TRUE	SUS (Unified Health System)	1	Ward/Room	1
Epimed Monitor	General/Mixed	False	H1654	two	Public	Brazil	AGE2182	13	496b7e9c-4d94-49c0-8a7c-f25e2ddef72f	1664917	63	F				05/16/2021	18:00	False	False	False			D	Death	05/29/2021	15:08		Uninformed	7	Death	No		0	13			TRUE	05/16/2021	D	Death	05/29/2021	5	Death	13	TRUE		6	Transfer from another hospital/institution	1
Epimed Monitor	General/Mixed	False	H1654	two	Public	Brazil	AGE2182	13	4080dbe9-2b81-4b3d-b1b2-5517e1f468b8	1664810	34	F				05/17/2021	23:00	False	False	False			A	High	05/20/2021	12:33	4	Waiting for exam results or completion	1	Ward or room	No		2	3			TRUE	05/15/2021	A	High	05/26/2021	1	Residence	11	TRUE		1	Ward/Room	1
Epimed Monitor	General/Mixed	False	H1654	two	Public	Brazil	AGE2182	13	90a1223d-8329-48ba-95f3-188cbd7a8540	1664177	59	F				05/19/2021	15:00	False	False	False			A	High	06/08/2021	19:05	3	Uninformed	1	Ward or room	No		9	20			TRUE	05/10/2021							False	SUS (Unified Health System)	4	Another ICU/ICU in your hospital	1
Epimed Monitor	General/Mixed	False	H1654	two	Public	Brazil	AGE2182	13	dcaa9417-9e1f-498f-98ac-0910b3d2ff92	1665423	65	F				05/20/2021	14:30	False	False	False			A	High	06/08/2021	19:07	9	No bed availability in the destination unit	1	Ward or room	No		1	19			TRUE	05/19/2021							False		1	Ward/Room	1
Epimed Monitor	General/Mixed	False	H1654	two	Public	Brazil	AGE2182	13	708e8685-b76d-4fe1-badc-4870c4069554	1665269	60	F				05/20/2021	22:10	False	False	False			D	Death	05/27/2021	03:30		Uninformed	7	Death	No		1	7			TRUE	05/19/2021	D	Death	05/27/2021	5	Death	8	TRUE		1	Ward/Room	1
Epimed Monitor	General/Mixed	False	H1654	two	Public	Brazil	AGE2182	13	f502b5f1-5c71-42c4-a15d-f3f2e3f961cd	1120657	44	M	80	170	27.7	05/21/2021	14:30	False	False	False			D	Death	05/31/2021	19:50		Uninformed	7	Death	No		2	10			TRUE	05/19/2021	D	Death	05/31/2021	5	Death	12	TRUE	SUS (Unified Health System)	6	Transfer from another hospital/institution	1
Epimed Monitor	General/Mixed	False	H1654	two	Public	Brazil	AGE2182	13	c64f197d-e21d-4e59-948f-461766f4dc6c	1665868	62	F				05/23/2021	14:00	False	False	False			A	High	06/04/2021	12:30	3	Uninformed	1	Ward or room	No		0	12			TRUE	05/23/2021							False		1	Ward/Room	1
Epimed Monitor	General/Mixed	False	H1654	two	Public	Brazil	AGE2182	13	36682bed-b1ac-4c14-a197-757f04f5f1f3	230143	41	M	120	170	41.5	05/23/2021	20:46	False	False	False			D	Death	06/03/2021	13:30		Uninformed	7	Death	No		2	11			TRUE	05/21/2021	D	Death	06/03/2021	5	Death	13	TRUE	SUS (Unified Health System)	1	Ward/Room	1
Epimed Monitor	General/Mixed	False	H1654	two	Public	Brazil	AGE2182	13	9c76f9e0-2b21-486a-9f3d-a38ebebb5b15	1665999	58	M				05/24/2021	14:30	False	False	False			D	Death	05/28/2021	01:30		Uninformed	7	Death	No		0	4			TRUE	05/24/2021	D	Death	05/28/2021	5	Death	4	TRUE		6	Transfer from another hospital/institution	1
Epimed Monitor	General/Mixed	False	H1654	two	Public	Brazil	AGE2182	13	b0ba9b67-499d-4ebd-a19d-315190e44413	1666195	35	M				05/25/2021	16:50	False	False	False			D	Death	06/11/2021	02:10		Uninformed	7	Death	No		0	17			TRUE	05/25/2021	D	Death	06/11/2021	5	Death	17	TRUE		6	Transfer from another hospital/institution	1
Epimed Monitor	General/Mixed	False	H1654	two	Public	Brazil	AGE2182	13	33339c8a-ad8d-4251-bd06-5202ce731cf9	1666094	45	F				05/26/2021	10:00 am	False	False	False			D	Death	05/30/2021	04:55		Uninformed	7	Death	No		2	4			TRUE	05/24/2021	D	Death	05/30/2021	5	Death	6	TRUE		1	Ward/Room	1
Epimed Monitor	General/Mixed	False	H1654	two	Public	Brazil	AGE2182	13	1e463433-1ae9-44da-9e53-48dd0265b6e8	1665869	56	F				05/26/2021	22:00	False	False	False			A	High	05/29/2021	4:00 pm	5	No bed availability in the destination unit	1	Ward or room	No		4	3			TRUE	05/22/2021	A	High	06/02/2021	1	Residence	11	TRUE		1	Ward/Room	1
Epimed Monitor	General/Mixed	False	H1654	two	Public	Brazil	AGE2182	13	7b13390c-4990-43e7-86b8-d4b9418edc51	1666303	39	F				05/27/2021	11:30	False	False	False			A	High	06/22/2021	17:00	7	No bed availability in the destination unit	1	Ward or room	No		1	26			TRUE	05/26/2021							False		1	Ward/Room	1
Epimed Monitor	General/Mixed	False	H1654	two	Public	Brazil	AGE2182	13	97cba21b-2a5d-4296-965d-97e9ecf53b30	1665803	38	M				05/28/2021	10:00 am	False	False	False			D	Death	06/17/2021	09:00		Uninformed	7	Death	No		5	20			TRUE	05/23/2021	D	Death	06/17/2021	5	Death	25	TRUE		1	Ward/Room	1
Epimed Monitor	General/Mixed	False	H1654	two	Public	Brazil	AGE2182	13	59a8f386-f791-418b-bbcd-0a669734f9eb	1666119	30	M				05/29/2021	02:00	False	False	False			A	High	06/22/2021	16:30	6	No bed availability in the destination unit	1	Ward or room	No		4	24			TRUE	05/25/2021							False		1	Ward/Room	1
Epimed Monitor	General/Mixed	False	H1654	two	Public	Brazil	AGE2182	13	0726b8f5-9667-4e5a-82c6-8e8642f658c6	1666906	29	M				05/29/2021	18:00	False	False	False			D	Death	06/12/2021	18:52		Uninformed	7	Death	No		0	14			TRUE	05/29/2021	D	Death	06/12/2021	5	Death	14	TRUE		6	Transfer from another hospital/institution	1
Epimed Monitor	General/Mixed	False	H1654	two	Public	Brazil	AGE2182	13	0a7938bd-b371-432c-ab42-7d8941660244	1666250	40	M				05/29/2021	21:30	False	False	False			A	High	06/06/2021	13:35	3	Uninformed	1	Ward or room	No		0	8			TRUE	05/29/2021							False		6	Transfer from another hospital/institution	1
Epimed Monitor	General/Mixed	False	H1654	two	Public	Brazil	AGE2182	13	9e09c370-855a-475d-88bb-855873d5d5df	1666650	48	M				05/30/2021	09:30	False	False	False			D	Death	06/09/2021	21:00		Uninformed	7	Death	No		2	10			TRUE	05/28/2021	D	Death	06/09/2021	5	Death	12	TRUE		1	Ward/Room	1
Epimed Monitor	General/Mixed	False	H1654	two	Public	Brazil	AGE2182	13	9106254d-687e-4746-be53-8cf74d8a438e	1666963	58	M				06/01/2021	00:50	False	False	False			A	High	06/08/2021	13:14	3	Uninformed	1	Ward or room	No		1	7			TRUE	05/31/2021							False		1	Ward/Room	1
Epimed Monitor	General/Mixed	False	H1654	two	Public	Brazil	AGE2182	13	e259c9d3-6e9f-4224-a5d3-21093c1168cf	1667093	51	M				06/03/2021	18:00	False	False	False			D	Death	06/13/2021	06:00		Uninformed	7	Death	No		3	10			TRUE	05/31/2021	D	Death	06/13/2021	5	Death	13	TRUE		1	Ward/Room	1
Epimed Monitor	General/Mixed	False	H1654	two	Public	Brazil	AGE2182	13	ff0dc8db-d280-4163-8618-5169f6f576bd	1667252	49	M				06/04/2021	14:40	False	False	False			A	High	06/22/2021	17:30	7	No bed availability in the destination unit	1	Ward or room	No		2	18			TRUE	06/02/2021							False		1	Ward/Room	1
Epimed Monitor	General/Mixed	False	H1654	two	Public	Brazil	AGE2182	13	d2acd3d7-7edf-42a0-940c-19811a513adb	1667091	32	M				06/06/2021	17:00	False	False	False			A	High	06/29/2021	20:30	9	Waiting for exam results or completion	1	Ward or room	No		4	23			TRUE	06/02/2021							False		1	Ward/Room	1
Epimed Monitor	General/Mixed	False	H1654	two	Public	Brazil	AGE2182	13	f42ef9d9-33be-4e50-8591-7f30cd2a2e57	1667335	53	M	95	170	32.9	06/08/2021	19:13	False	False	False			D	Death	06/20/2021	13:53		Uninformed	7	Death	No		0	12			TRUE	06/08/2021	D	Death	06/20/2021	5	Death	12	TRUE	SUS (Unified Health System)	6	Transfer from another hospital/institution	1
Epimed Monitor	General/Mixed	False	H1654	two	Public	Brazil	AGE2182	13	55674560-586c-4cb2-b6d0-ded47553eed0	1668108	42	M				06/08/2021	21:20	False	False	False			A	High	06/20/2021	13:53	2	Uninformed	1	Ward or room	No		0	12			TRUE	06/08/2021							False		1	Ward/Room	1
Epimed Monitor	General/Mixed	False	H1654	two	Public	Brazil	AGE2182	13	c3afe6c3-ba21-43c9-8083-c4a5bb28f36d	1668138	55	M				06/09/2021	00:20	False	False	False			A	High	06/29/2021	20:30	9	Waiting for exam results or completion	1	Ward or room	No		0	20			TRUE	06/09/2021							False		6	Transfer from another hospital/institution	1
Epimed Monitor	General/Mixed	False	H1654	two	Public	Brazil	AGE2182	13	ed3dce40-9f10-4bd5-902f-93f2a5fed36e	1667642	68	F				06/09/2021	21:40	False	False	False			D	Death	06/16/2021	18:40		Uninformed	7	Death	No		0	7			TRUE	06/09/2021	D	Death	06/16/2021	5	Death	7	TRUE		6	Transfer from another hospital/institution	1
Epimed Monitor	General/Mixed	False	H1654	two	Public	Brazil	AGE2182	13	0d77aeb6-eeea-4c7e-91ed-79274d2d4efc	332199	46	M	75	170	26	06/10/2021	00:16	False	False	False			D	Death	07/01/2021	00:01		Uninformed	7	Death	No		12	21			TRUE	05/29/2021	D	Death	07/01/2021	5	Death	33	TRUE	SUS (Unified Health System)	1	Ward/Room	1
Epimed Monitor	General/Mixed	False	H1654	two	Public	Brazil	AGE2182	13	efb109c1-2bd4-45ee-a139-a2954156ee33	1668305	66	F				06/11/2021	13:00	False	False	False			A	High	06/14/2021	16:30	3	Uninformed	1	Ward or room	No		1	3			TRUE	06/10/2021							False		1	Ward/Room	1
Epimed Monitor	General/Mixed	False	H1654	two	Public	Brazil	AGE2182	13	68aaad74-201d-4224-b833-286681167587	1668443	57	F				06/12/2021	23:45	False	False	False			D	Death	07/14/2021	02:15		Uninformed	7	Death	No		2	32			TRUE	06/10/2021	D	Death	07/14/2021	5	Death	34	TRUE		1	Ward/Room	1
Epimed Monitor	General/Mixed	False	H1654	two	Public	Brazil	AGE2182	13	d3bb0be4-29e5-410b-bf4c-e565534a12f8	1668683	53	M				06/13/2021	13:00	False	False	False			D	Death	07/12/2021	03:43		Uninformed	7	Death	No		0	29			TRUE	06/13/2021	D	Death	07/12/2021	5	Death	29	TRUE	SUS (Unified Health System)	1	Ward/Room	1
Epimed Monitor	General/Mixed	False	H1654	two	Public	Brazil	AGE2182	13	2f0d1527-54f3-4d83-9c20-f5a35fd40e31	1668703	66	F				06/14/2021	8:00 pm	False	False	False			D	Death	07/04/2021	06:30		Uninformed	7	Death	No		0	20			TRUE	06/14/2021	D	Death	07/04/2021	5	Death	20	TRUE		1	Ward/Room	1
Epimed Monitor	General/Mixed	False	H1654	two	Public	Brazil	AGE2182	13	620ad0fb-62cb-4a99-938b-4f495c172392	1669225	35	M				06/16/2021	23:40	False	False	False			A	High	06/30/2021	4:00 pm	7	Waiting for exam results or completion	1	Ward or room	No		0	14			TRUE	06/16/2021							False		6	Transfer from another hospital/institution	1
Epimed Monitor	General/Mixed	False	H1654	two	Public	Brazil	AGE2182	13	f2e2396c-e75a-4912-8bb2-356faec8c71d	1669204	49	F				06/17/2021	14:30	False	False	False			D	Death	06/22/2021	04:20		Uninformed	7	Death	No		0	5			TRUE	06/17/2021	D	Death	06/22/2021	5	Death	5	TRUE		1	Ward/Room	1
Epimed Monitor	General/Mixed	False	H1654	two	Public	Brazil	AGE2182	13	dbe7f608-45fa-44e9-a7b9-bff65323c9db	1669387	63	M				06/20/2021	4:00 pm	False	False	False			D	Death	07/05/2021	11:25		Uninformed	7	Death	No		1	15			TRUE	06/19/2021	D	Death	07/05/2021	5	Death	16	TRUE		6	Transfer from another hospital/institution	1
Epimed Monitor	General/Mixed	False	H1654	two	Public	Brazil	AGE2182	13	e18ea277-dbf8-45b8-8cdc-8faf0a53cda6	1669604	76	F				06/21/2021	00:15	False	False	False			D	Death	06/22/2021	06:40		Uninformed	7	Death	No		1	1			TRUE	06/20/2021	D	Death	06/22/2021	5	Death	2	TRUE		1	Ward/Room	1
Epimed Monitor	General/Mixed	False	H1654	two	Public	Brazil	AGE2182	13	9aabd17b-da8d-408d-b42d-2f3ed58a8056	1669596	68	F				06/22/2021	13:00	False	False	False			A	High	07/19/2021	4:00 pm	5	Waiting for family	1	Ward or room	No		1	27			TRUE	06/21/2021							False		1	Ward/Room	1
Epimed Monitor	General/Mixed	False	H1654	two	Public	Brazil	AGE2182	13	2b674566-afca-4ef8-84cb-136c8181f027	1669908	52	F				06/22/2021	21:30	False	False	False			D	Death	07/08/2021	12:56		Uninformed	7	Death	No		0	16			TRUE	06/22/2021	D	Death	07/08/2021	5	Death	16	TRUE		6	Transfer from another hospital/institution	1
Epimed Monitor	General/Mixed	False	H1654	two	Public	Brazil	AGE2182	13	dd2a65c8-4a57-4feb-b4a0-f372dc6be1c9	1669918	63	F				06/23/2021	00:40	False	False	False			A	High	07/02/2021	21:00	10	Waiting for family	1	Ward or room	No		0	9			TRUE	06/23/2021							False		6	Transfer from another hospital/institution	1
Epimed Monitor	General/Mixed	False	H1654	two	Public	Brazil	AGE2182	13	d0bec5f0-d8a3-43e2-bcd7-14b46e4d652e	1669828	56	F				06/23/2021	10:30	False	False	False			A	High	07/02/2021	15:00	5	Waiting for family	1	Ward or room	No		1	9			TRUE	06/22/2021							False		1	Ward/Room	1
Epimed Monitor	General/Mixed	False	H1654	two	Public	Brazil	AGE2182	13	d1211084-25ae-41fb-bd51-f05be2228900	1670078	22	F				06/23/2021	20:30	False	False	False			A	High	07/28/2021	13:30	27	Uninformed			No		0	35			TRUE	06/23/2021							False		6	Transfer from another hospital/institution	1
Epimed Monitor	General/Mixed	False	H1654	two	Public	Brazil	AGE2182	13	f3e78f6c-53ed-4332-b848-418a98f82e5b	1670472	42	M				06/30/2021	09:30	False	False	False			D	Death	07/12/2021	03:05		Uninformed	7	Death	No		2	12			TRUE	06/28/2021	D	Death	07/12/2021	5	Death	14	TRUE		6	Transfer from another hospital/institution	1
Epimed Monitor	General/Mixed	False	H1654	two	Public	Brazil	AGE2182	13	bab085cb-68b8-47d3-bfae-9f9f1be9e962	1670947	28	M				07/01/2021	02:00	False	False	False			A	High	07/09/2021	4:00 pm	5	Waiting for family	1	Ward or room	No		0	8			TRUE	07/01/2021							False		6	Transfer from another hospital/institution	1
Epimed Monitor	General/Mixed	False	H1654	two	Public	Brazil	AGE2182	13	6d3f4288-5394-4823-a0c0-c5443848a560	1670777	64	F				07/01/2021	08:30	False	False	False			D	Death	07/20/2021	16:35		Uninformed	7	Death	No		2	19			TRUE	06/29/2021	D	Death	07/20/2021	5	Death	21	TRUE		1	Ward/Room	1
Epimed Monitor	General/Mixed	False	H1654	two	Public	Brazil	AGE2182	13	072528eb-de3d-4d8d-8234-311c0e5c9ecd	1670906	35	M				07/01/2021	11:00	False	False	False			A	High	07/08/2021	11:32	0	Uninformed	1	Ward or room	No		0	7			TRUE	07/01/2021							False		6	Transfer from another hospital/institution	1
Epimed Monitor	General/Mixed	False	H1654	two	Public	Brazil	AGE2182	13	9238d8d6-c592-4fb1-a9c5-5de998ee7fb9	1671103	45	M				07/02/2021	23:00	False	False	False			A	High	07/17/2021	14:00	3	Uninformed			No		0	15			TRUE	07/02/2021	D	Death	07/30/2021	5	Death	28	TRUE		6	Transfer from another hospital/institution	1
Epimed Monitor	General/Mixed	False	H1654	two	Public	Brazil	AGE2182	13	67a5f1a4-1fc5-476a-9d34-a90a5efdc34d	1671183	49	F	90	160	35.2	07/05/2021	17:41	False	False	False			A	High	08/10/2021	16:55	2	Uninformed	1	Ward or room	No		0	36			TRUE	07/05/2021							False	SUS (Unified Health System)	1	Ward/Room	1
Epimed Monitor	General/Mixed	False	H1654	two	Public	Brazil	AGE2182	13	e811803c-bb7c-4c1c-9672-06a0540e3346	1671517	42	F				07/05/2021	19:40	False	False	False			A	High	07/19/2021	4:00 pm	5	Waiting for family	1	Ward or room	No		0	14			TRUE	07/05/2021							False		6	Transfer from another hospital/institution	1
Epimed Monitor	General/Mixed	False	H1654	two	Public	Brazil	AGE2182	13	b9264e89-fa9d-4d55-b498-2cb5f5d8a1d5	1670569	81	M				07/06/2021	17:00	False	False	False			A	High	07/08/2021	11:33	0	Uninformed	1	Ward or room	No		0	2			False	07/06/2021							False		6	Transfer from another hospital/institution	1
Epimed Monitor	General/Mixed	False	H1654	two	Public	Brazil	AGE2182	13	0c07f857-f28a-4322-8b13-5dbd5ac50d7f	1671761	37	M	90	180	27.8	07/08/2021	16:50	False	False	False			A	High	07/14/2021	17:24	0	Uninformed	1	Ward or room	No		1	6			TRUE	07/07/2021							False	SUS (Unified Health System)	1	Ward/Room	1
Epimed Monitor	General/Mixed	False	H1654	two	Public	Brazil	AGE2182	13	75b39678-67ff-42eb-b7ec-d0bb3b8bb38f	1671690	40	M				07/08/2021	22:00	False	False	False			A	High	05/08/2021	14:02	4	Waiting for family	1	Ward or room	No		1	28			TRUE	07/07/2021	D	Death	05/08/2021	5	Death	29	TRUE		1	Ward/Room	1
Epimed Monitor	General/Mixed	False	H1654	two	Public	Brazil	AGE2182	13	61b732b3-5426-4c18-aabb-0c177c6ef145	1672995	65	M	90	180	27.8	07/11/2021	14:58	False	False	False			A	High	07/29/2021	11:49	2	Uninformed	1	Ward or room	No		0	18			TRUE	07/11/2021							False	SUS (Unified Health System)	6	Transfer from another hospital/institution	1
Epimed Monitor	General/Mixed	False	H1654	two	Public	Brazil	AGE2182	13	ab079d49-26a2-434a-867e-d09e52a97fcd	1672255	50	M				07/12/2021	10:00 am	False	False	False			D	Death	07/17/2021	05:42		Uninformed	7	Death	No		0	5			TRUE	07/12/2021	D	Death	07/17/2021	5	Death	5	TRUE		6	Transfer from another hospital/institution	1
Epimed Monitor	General/Mixed	False	H1654	two	Public	Brazil	AGE2182	13	9fa1b4d1-638d-4b6c-b4ba-a5572e5603cb	1672173	59	M				07/13/2021	10:00 am	False	False	False			D	Death	07/25/2021	21:00		Uninformed	7	Death	No		1	12			TRUE	07/12/2021	D	Death	07/25/2021	5	Death	13	TRUE		1	Ward/Room	1
Epimed Monitor	General/Mixed	False	H1654	two	Public	Brazil	AGE2182	13	d5f3a1f9-3079-4d5e-acf5-5a767aa93f56	186451	73	M	90	170	31.1	07/15/2021	21:00	False	False	False			D	Death	08/23/2021	23:25		Uninformed	7	Death	No		0	39			TRUE	07/15/2021	D	Death	08/23/2021	5	Death	39	TRUE	SUS (Unified Health System)	1	Ward/Room	1
Epimed Monitor	General/Mixed	False	H1654	two	Public	Brazil	AGE2182	13	cd2e14f2-21ab-4e32-b716-cda4e6b51107	1672769	66	F				07/16/2021	17:30	False	False	False			A	High	08/13/2021	14:30	1	Uninformed	1	Ward or room	No		0	28			TRUE	07/16/2021							False		1	Ward/Room	1
Epimed Monitor	General/Mixed	False	H1654	two	Public	Brazil	AGE2182	13	511bd45f-8feb-46ca-a8d3-34cb45a9ec65	784103	38	M	85	180	26.2	07/17/2021	14:32	False	False	False			A	High	03/08/2021	12:00 pm	2	Uninformed	1	Ward or room	No		0	17			TRUE	07/17/2021							False	SUS (Unified Health System)	6	Transfer from another hospital/institution	1
Epimed Monitor	General/Mixed	False	H1654	two	Public	Brazil	AGE2182	13	9fa3812b-f26c-4894-8659-774119656c52	1672862	59	F				07/20/2021	00:30	False	False	False			D	Death	01/08/2021	09:56		Uninformed	7	Death	No		2	12			TRUE	07/18/2021	D	Death	01/08/2021	5	Death	14	TRUE		1	Ward/Room	1
Epimed Monitor	General/Mixed	False	H1654	two	Public	Brazil	AGE2182	13	4385a808-d13a-4f78-be6b-1d129122b036	1673420	65	F				07/22/2021	05:00	False	False	False			A	High	08/16/2021	10:00 am	1	Uninformed	1	Ward or room	No		1	25			TRUE	07/21/2021							False		1	Ward/Room	1
Epimed Monitor	General/Mixed	False	H1654	two	Public	Brazil	AGE2182	13	f6561ce0-d709-4ae5-ae22-28b85db5fb43	1673606	53	F	80	160	31.2	07/23/2021	18:03	False	False	False			D	Death	08/13/2021	04:50		Uninformed	7	Death	No		0	21			TRUE	07/23/2021	D	Death	08/13/2021	5	Death	21	TRUE	SUS (Unified Health System)	1	Ward/Room	1
Epimed Monitor	General/Mixed	False	H1654	two	Public	Brazil	AGE2182	13	66e919e9-fcec-43aa-a015-2478d1a76758	1673171	43	F	85	160	33.2	07/29/2021	11:59	False	False	False			A	High	02/08/2021	13:45	1	Uninformed	1	Ward or room	No		8	4			TRUE	07/21/2021							False	SUS (Unified Health System)	1	Ward/Room	1
Epimed Monitor	General/Mixed	False	H1654	two	Public	Brazil	AGE2182	13	c5bd71dd-4742-4c6a-a6e7-47db12d7c122	1674227	41	F				07/30/2021	13:30	False	False	False			A	High	08/12/2021	14:00	4	Uninformed	1	Ward or room	No		1	13			TRUE	07/29/2021							False		1	Ward/Room	1
Epimed Monitor	General/Mixed	False	H1654	two	Public	Brazil	AGE2182	13	fd3c8b3d-4bb9-4f10-934c-6d945174414a	1674835	83	F				02/08/2021	23:30	False	False	False			A	High	08/10/2021	16:54	2	Uninformed	1	Ward or room	No		0	8			TRUE	02/08/2021							False		6	Transfer from another hospital/institution	1
Epimed Monitor	General/Mixed	False	H1654	two	Public	Brazil	AGE2182	13	911477ae-0268-4500-8829-f7fc6b2ef1c2	1674915	41	M				08/04/2021	8:00 pm	False	False	False			D	Death	08/24/2021	07:35		Uninformed	7	Death	No		0	20			TRUE	08/04/2021	D	Death	08/24/2021	5	Death	20	TRUE		1	Ward/Room	1
Epimed Monitor	General/Mixed	False	H1654	two	Public	Brazil	AGE2182	13	a20546a1-9fe3-403c-85e4-1ccccb72e6c2	1675475	72	M				09/08/2021	17:30	False	False	False			A	High	08/14/2021	11:30	2	Uninformed	1	Ward or room	No		0	5			TRUE	09/08/2021							False		1	Ward/Room	1
Epimed Monitor	General/Mixed	False	H1654	two	Public	Brazil	AGE2182	13	30cbd21a-f219-4053-a620-19052fa14224	786986	33	M	80	175	26.1	08/13/2021	11:16	False	False	False			A	High	08/16/2021	10:00 am	1	Uninformed	1	Ward or room	No		3	3			TRUE	08/10/2021							False	SUS (Unified Health System)	1	Ward/Room	1
Epimed Monitor	General/Mixed	False	H1654	two	Public	Brazil	AGE2182	13	b241bcee-1ec0-4062-977c-7e6724182b29	1676300	39	M				08/14/2021	15:00	False	False	False			A	High	01/09/2021	4:00 pm	4	No bed availability in the destination unit	1	Ward or room	No		0	18			TRUE	08/14/2021	A	High	09/12/2021	1	Residence	29	TRUE		6	Transfer from another hospital/institution	1
Epimed Monitor	General/Mixed	False	H1654	two	Public	Brazil	AGE2182	13	b6d5527b-3757-4320-85c5-3fcff913e39b	1676332	58	M	85	165	31.2	08/16/2021	09:56	False	False	False			D	Death	02/09/2021	23:30		Uninformed	7	Death	No		1	17			TRUE	08/15/2021	D	Death	02/09/2021	5	Death	18	TRUE	SUS (Unified Health System)	1	Ward/Room	1
Epimed Monitor	General/Mixed	False	H1654	two	Public	Brazil	AGE2182	13	f22e5417-09b9-4953-b306-4942ca3b2a49	1148913	64	M				08/29/2021	18:27	False	False	False											No		1	25			TRUE	08/28/2021							False	SUS (Unified Health System)	2	Emergency	1
Epimed Monitor	General/Mixed	False	H1654	two	Public	Brazil	AGE2680	17	81d7a3f4-5483-41bf-ad09-d2bda6502a9f	1089819	38	F	170	170	58.8	07/08/2020	14:00	TRUE	False	False	B34.2	Coronavirus infection of unspecified location	A	High	08/24/2020	16:02	8	Other reasons	4	Another hospital	No		13	17			TRUE	07/25/2020	A	High	08/24/2020	3	Another hospital	30	TRUE	SUS (Unified Health System)	4	Another ICU/ICU in your hospital	1
Epimed Monitor	General/Mixed	False	H1654	two	Public	Brazil	AGE2680	17	3f5c0009-c5d8-48a7-9a71-4af1f11cac8d	1638204	73	M	75	180	23.1	08/15/2020	12:40	TRUE	False	False	J95-J99	Other diseases of the respiratory system	A	High	08/16/2020	10:00 am	2	Uninformed	1	Ward or room	No		3	1			TRUE	08/12/2020	A	High	08/18/2020	1	Residence	6	TRUE	SUS (Unified Health System)	4	Another ICU/ICU in your hospital	1
Epimed Monitor	General/Mixed	False	H1654	two	Public	Brazil	AGE2680	17	bbcee97a-2ed5-44ac-8330-f4a4b5e4fb4c	297138	50	M				08/25/2020	20:30	False	False	False	B34.2	Coronavirus infection of unspecified location	A	High	08/30/2020	11:18	4	Uninformed	1	Ward or room	No		0	5			TRUE	08/25/2020	A	High	08/31/2020	1	Residence	6	TRUE	SUS (Unified Health System)	6	Transfer from another hospital/institution	1
Epimed Monitor	General/Mixed	False	H1654	two	Public	Brazil	AGE2680	17	b7dccddb-b485-4944-ac5d-69a5872f17c0	209025	82	F				01/09/2020	09:42	False	False	False	B34.2	Coronavirus infection of unspecified location	D	Death	09/29/2020	10:30		Uninformed	7	Death	No		1	28			TRUE	08/31/2020	D	Death	09/29/2020	5	Death	29	TRUE	SUS (Unified Health System)	1	Ward/Room	1
Epimed Monitor	General/Mixed	False	H1654	two	Public	Brazil	AGE2680	17	a0afd572-3dcf-4c46-8d1a-8c69ffa3b4e5	63608	71	M	90			09/13/2020	23:00	False	False	False	B34.2	Coronavirus infection of unspecified location	A	High	10/20/2020	20:14	13	No bed availability in the destination unit	1	Ward or room	No		0	37			TRUE	09/13/2020	A	High	10/29/2020	1	Residence	46	TRUE	SUS (Unified Health System)	5	Semi-intensive Unit	1
Epimed Monitor	General/Mixed	False	H1654	two	Public	Brazil	AGE2680	17	d04de70f-f363-4c8c-a779-6aa0bbada22a	1641774	42	M	90	180	27.8	09/16/2020	09:00	False	False	False			A	High	09/17/2020	17:00		Uninformed	3	Another hospital ICU/ICU	No		1	1			TRUE	09/15/2020	A	High	10/03/2020	1	Residence	18	TRUE	SUS (Unified Health System)	1	Ward/Room	1
Epimed Monitor	General/Mixed	False	H1654	two	Public	Brazil	AGE2680	17	5bf26215-c360-40f3-856b-37adf9c179ff	1095133	67	F				10/06/2020	16:30	False	False	False			D	Death	03/11/2020	05:00		Uninformed	7	Death	No		0	28			TRUE	10/06/2020	D	Death	03/11/2020	5	Death	28	TRUE	SUS (Unified Health System)	6	Transfer from another hospital/institution	1
Epimed Monitor	General/Mixed	False	H1654	two	Public	Brazil	AGE2680	17	4279183e-ba3a-41c7-ad22-01e343d7c8eb	814113	62	F				10/11/2020	02:17	False	False	False			A	High	10/19/2020	21:00			3	Another hospital ICU/ICU	No		0	8			TRUE	10/11/2020	D	Death	10/20/2020	5	Death	9	TRUE	SUS (Unified Health System)	6	Transfer from another hospital/institution	1
Epimed Monitor	General/Mixed	False	H1654	two	Public	Brazil	AGE2680	17	4279183e-ba3a-41c7-ad22-01e343d7c8eb	814113	62	F				10/11/2020	8:00 pm	False	False	False			A	High	10/19/2020	22:00			3	Another hospital ICU/ICU	No		0	8			TRUE	10/11/2020	D	Death	10/20/2020	5	Death	9	TRUE		6	Transfer from another hospital/institution	1
Epimed Monitor	General/Mixed	False	H1654	two	Public	Brazil	AGE2680	17	6f0fa0f9-6505-4474-945c-61bfd6f77a88	1096881	65	M	80	170	27.7	10/27/2020	8:00 pm	False	False	False			A	High	10/29/2020	15:00			3	Another hospital ICU/ICU	No		0	2			TRUE	10/27/2020	D	Death	11/16/2020	5	Death	20	TRUE	SUS (Unified Health System)	1	Ward/Room	1
Epimed Monitor	General/Mixed	False	H1654	two	Public	Brazil	AGE2680	17	9e14516d-32d0-4da7-addc-9d11492222e6	2643595	85	F				10/29/2020	18:30	False	False	False			D	Death	09/11/2020	03:40		Uninformed	7	Death	No		0	11			TRUE	10/29/2020	D	Death	09/11/2020	5	Death	11	TRUE		2	Emergency	1
Epimed Monitor	General/Mixed	False	H1654	two	Public	Brazil	AGE2680	17	7bf375eb-f660-4019-9a0c-d993adb27e86	178993	77	M	90	175	29.4	10/31/2020	23:58	False	False	False			D	Death	04/11/2020	11:00		Uninformed	7	Death	No		0	4			False	10/31/2020	D	Death	04/11/2020	5	Death	4	TRUE		2	Emergency	1
Epimed Monitor	General/Mixed	False	H1654	two	Public	Brazil	AGE2680	17	81db218d-feeb-4d40-940f-fa5897d2368e	44710	73	M				03/11/2020	16:36	False	False	False			D	Death	11/25/2020	05:00		Uninformed	7	Death	No		0	22			False	03/11/2020	D	Death	11/25/2020	5	Death	22	TRUE	SUS (Unified Health System)	4	Another ICU/ICU in your hospital	1
Epimed Monitor	General/Mixed	False	H1654	two	Public	Brazil	AGE2680	17	5120088a-11d2-4237-9f2a-b98efc48a760	1646418	73	M				11/08/2020	15:15	False	False	False			A	High	11/19/2020	17:30			3	Another hospital ICU/ICU	No		3	11			False	05/11/2020	D	Death	05/01/2021	5	Death	61	TRUE	SUS (Unified Health System)	4	Another ICU/ICU in your hospital	1
Epimed Monitor	General/Mixed	False	H1654	two	Public	Brazil	AGE2680	17	7d9e3046-9986-4c1f-9cdb-ca012c4057d5	130251	73	F				09/11/2020	8:00 pm	False	False	False			A	High	11/13/2020	13:30	4	No bed availability in the destination unit	1	Ward or room	No		7	4			False	11/02/2020	A	High	11/27/2020	1	Residence	25	TRUE	SUS (Unified Health System)	4	Another ICU/ICU in your hospital	1
Epimed Monitor	General/Mixed	False	H1654	two	Public	Brazil	AGE2680	17	db5b00ba-b954-4a4b-ba3d-a55fb192aab6	261246	75	F	100	168	35.4	11/12/2020	21:00	False	False	False			D	Death	11/27/2020	21:00		Uninformed	7	Death	No		0	15			False	11/12/2020	D	Death	11/27/2020	5	Death	15	TRUE	SUS (Unified Health System)	4	Another ICU/ICU in your hospital	1
Epimed Monitor	General/Mixed	False	H1654	two	Public	Brazil	AGE2680	17	6e2f7e4b-1f3f-46c8-9904-579670b02405	40788	48	F				11/20/2020	15:30	False	False	False			D	Death	11/26/2020	06:00		Uninformed	7	Death	No		0	6			TRUE	11/20/2020	D	Death	11/26/2020	5	Death	6	TRUE		2	Emergency	1
Epimed Monitor	General/Mixed	False	H1654	two	Public	Brazil	AGE2680	17	ce504081-a4a3-406a-804d-6f4706877d85	1648115	62	M	90	180	27.8	11/25/2020	18:36	False	False	False			D	Death	11/26/2020	23:00		Uninformed	7	Death	No		0	1			TRUE	11/25/2020	D	Death	11/26/2020	5	Death	1	TRUE		6	Transfer from another hospital/institution	1
Epimed Monitor	General/Mixed	False	H1654	two	Public	Brazil	AGE2680	17	43086231-8012-4e31-b678-22289af117bc	1648085	75	F				11/25/2020	23:00	False	False	False			D	Death	12/05/2020	14:43		Uninformed	7	Death	No		0	10			TRUE	11/25/2020	D	Death	12/05/2020	5	Death	10	TRUE		1	Ward/Room	1
Epimed Monitor	General/Mixed	False	H1654	two	Public	Brazil	AGE2680	17	c9ee927b-37fc-4fe1-bc2c-42500dce41ac	1647978	53	M	100	178	31.6	11/26/2020	09:00	False	False	False			D	Death	03/12/2020	20:30		Uninformed	7	Death	No		2	7			TRUE	11/24/2020	D	Death	03/12/2020	5	Death	9	TRUE		1	Ward/Room	1
Epimed Monitor	General/Mixed	False	H1654	two	Public	Brazil	AGE2680	17	50947e71-4249-471f-ba77-d15af6d4bb16	1648327	66	F				11/27/2020	09:55	False	False	False			D	Death	12/06/2020	14:20		Uninformed	7	Death	No		2	9			TRUE	11/25/2020	D	Death	12/06/2020	5	Death	11	TRUE		1	Ward/Room	1
Epimed Monitor	General/Mixed	False	H1654	two	Public	Brazil	AGE2680	17	7d19f2c9-0f9a-48a8-a0a6-100c6aaba0a5	1648164	35	M				11/28/2020	19:00	False	False	False			D	Death	12/28/2020	14:00		Uninformed	7	Death	No		2	30			TRUE	11/26/2020	D	Death	12/28/2020	5	Death	32	TRUE		6	Transfer from another hospital/institution	1
Epimed Monitor	General/Mixed	False	H1654	two	Public	Brazil	AGE2680	17	2def2ddc-1f43-459e-a50c-0acc469c04ec	1648392	60	F	100	158	40.1	11/28/2020	19:10	False	False	False			D	Death	12/05/2020	05:20		Uninformed	7	Death	No		0	7			TRUE	11/28/2020	D	Death	12/05/2020	5	Death	7	TRUE		6	Transfer from another hospital/institution	1
Epimed Monitor	General/Mixed	False	H1654	two	Public	Brazil	AGE2680	17	50928624-e3d5-400e-9d1e-7dfdc48aa845	1648356	66	F				11/28/2020	21:15	False	False	False			D	Death	09/01/2021	05:00		Uninformed	7	Death	No		0	42			TRUE	11/28/2020	D	Death	09/01/2021	5	Death	42	TRUE		6	Transfer from another hospital/institution	1
Epimed Monitor	General/Mixed	False	H1654	two	Public	Brazil	AGE2680	17	ac865797-3c4a-416d-bc8e-29edd4c3ea7d	1648488	71	M				11/30/2020	23:30	False	False	False			D	Death	12/08/2020	18:40		Uninformed	7	Death	No		0	8			TRUE	11/30/2020	D	Death	12/08/2020	5	Death	8	TRUE		1	Ward/Room	1
Epimed Monitor	General/Mixed	False	H1654	two	Public	Brazil	AGE2680	17	16f49a65-7119-40ce-8288-197d6489fd23	1648696	80	F				12/02/2020	18:30	False	False	False			D	Death	12/08/2020	21:00		Uninformed	7	Death	No		0	6			TRUE	12/02/2020	D	Death	12/08/2020	5	Death	6	TRUE		1	Ward/Room	1
Epimed Monitor	General/Mixed	False	H1654	two	Public	Brazil	AGE2680	17	e9dfef99-d86d-44b3-93f3-b2f1b269897c	150308	82	F				04/12/2020	13:31	False	False	False			D	Death	12/07/2020	09:45		Uninformed	7	Death	No		10	3			TRUE	11/24/2020	D	Death	12/07/2020	5	Death	13	TRUE		4	Another ICU/ICU in your hospital	1
Epimed Monitor	General/Mixed	False	H1654	two	Public	Brazil	AGE2680	17	d666911e-aa2f-4551-8658-aeadfb3d3e24	1648881	85	M				12/05/2020	22:40	False	False	False			D	Death	12/13/2020	20:30		Uninformed	7	Death	No		0	8			TRUE	12/05/2020	D	Death	12/13/2020	5	Death	8	TRUE		6	Transfer from another hospital/institution	1
Epimed Monitor	General/Mixed	False	H1654	two	Public	Brazil	AGE2680	17	5785ee4b-2101-4b56-bf17-e9880c7b5d6f	1648875	74	F				12/06/2020	15:00	False	False	False			D	Death	12/09/2020	12:30		Uninformed	7	Death	No		1	3			TRUE	12/05/2020	D	Death	12/09/2020	5	Death	4	TRUE	SUS (Unified Health System)	1	Ward/Room	1
Epimed Monitor	General/Mixed	False	H1654	two	Public	Brazil	AGE2680	17	c564586a-b317-4ff1-97c9-787a68a8b350	855959	69	M				12/08/2020	10:30	False	False	False			D	Death	15/12/2020	8 o'clock		Uninformed	7	Death	No		0	7			TRUE	12/08/2020	D	Death	15/12/2020	5	Death	7	TRUE	SUS (Unified Health System)	6	Transfer from another hospital/institution	1
Epimed Monitor	General/Mixed	False	H1654	two	Public	Brazil	AGE2680	17	f29996d0-a983-40b7-ac5c-e100b39d2dba	1649113	74	M				12/08/2020	14:45	False	False	False			D	Death	12/12/2020	12:50		Uninformed	7	Death	No		0	4			TRUE	12/08/2020	D	Death	12/12/2020	5	Death	4	TRUE		6	Transfer from another hospital/institution	1
Epimed Monitor	General/Mixed	False	H1654	two	Public	Brazil	AGE2680	17	8674cfa0-c8ae-4225-b930-290f12b70aa7	1648877	71	M				12/08/2020	15:00	False	False	False			D	Death	12/31/2020	15:30		Uninformed	7	Death	No		3	23			TRUE	12/05/2020	D	Death	12/31/2020	5	Death	26	TRUE		1	Ward/Room	1
Epimed Monitor	General/Mixed	False	H1654	two	Public	Brazil	AGE2680	17	056a2fdd-a55b-4fa7-8402-3e7614f57e3b	1649034	76	M				12/10/2020	09:00	False	False	False			D	Death	12/21/2020	06:10		Uninformed	7	Death	No		3	11			False	12/07/2020	D	Death	12/21/2020	5	Death	14	TRUE		1	Ward/Room	1
Epimed Monitor	General/Mixed	False	H1654	two	Public	Brazil	AGE2680	17	fd042343-7aaa-44d4-86d8-3add53c73f44	1649132	33	M				12/12/2020	03:00	False	False	False			D	Death	12/17/2020	08:15		Uninformed	7	Death	No		4	5			TRUE	12/08/2020	D	Death	12/17/2020	5	Death	9	TRUE		1	Ward/Room	1
Epimed Monitor	General/Mixed	False	H1654	two	Public	Brazil	AGE2680	17	4de4454c-825d-4df5-adb9-e66ba4474171	1648921	56	M				15/12/2020	13:00	False	False	False			D	Death	12/23/2020	03:00		Uninformed	7	Death	No		9	8			TRUE	12/06/2020	D	Death	12/23/2020	5	Death	17	TRUE		1	Ward/Room	1
Epimed Monitor	General/Mixed	False	H1654	two	Public	Brazil	AGE2680	17	82a838f4-ab0b-4adf-a6c1-c49ccb1758f6	1649227	70	M				12/16/2020	12:00 pm	False	False	False			D	Death	12/16/2020	22:00		Uninformed	7	Death	No		7	1			TRUE	12/09/2020	D	Death	12/16/2020	5	Death	7	TRUE		1	Ward/Room	1
Epimed Monitor	General/Mixed	False	H1654	two	Public	Brazil	AGE2680	17	36eb0cd9-2536-4592-aa01-41c61a70fdca	1649775	69	M				12/16/2020	15:00	False	False	False			A	High	12/20/2020	14:00	4	Uninformed			No		0	4			TRUE	12/16/2020	D	Death	12/27/2020	5	Death	11	TRUE		6	Transfer from another hospital/institution	1
Epimed Monitor	General/Mixed	False	H1654	two	Public	Brazil	AGE2680	17	a2977f33-c155-45e7-b1cd-6440e7bedcf2	1649773	73	F				12/17/2020	15:00	False	False	False			D	Death	12/29/2020	23:48		Uninformed	7	Death	No		1	12			TRUE	12/16/2020	D	Death	12/29/2020	5	Death	13	TRUE		1	Ward/Room	1
Epimed Monitor	General/Mixed	False	H1654	two	Public	Brazil	AGE2680	17	eb8a9db2-ca05-4f9e-8b29-3cffcf991f51	81129	54	F				12/17/2020	18:20	False	False	False			D	Death	01/13/2021	07:25		Uninformed	7	Death	No		0	27			TRUE	12/17/2020	D	Death	01/13/2021	5	Death	27	TRUE		6	Transfer from another hospital/institution	1
Epimed Monitor	General/Mixed	False	H1654	two	Public	Brazil	AGE2680	17	8fc4ffe5-359e-4d30-ad9c-18a8709e46be	1649462	41	F				12/18/2020	17:30	False	False	False			A	High	01/12/2021	12:00 pm	0	Uninformed	1	Ward or room	No		5	25			TRUE	12/13/2020	A	High	04/25/2021	3	Another hospital	133	TRUE		1	Ward/Room	1
Epimed Monitor	General/Mixed	False	H1654	two	Public	Brazil	AGE2680	17	39322933-f349-4e42-a749-095ce217c65d	1649779	82	F				12/18/2020	8:00 pm	False	False	False			D	Death	01/01/2021	4:00 pm		Uninformed	7	Death	No		2	14			TRUE	12/16/2020	D	Death	01/01/2021	5	Death	16	TRUE		1	Ward/Room	1
Epimed Monitor	General/Mixed	False	H1654	two	Public	Brazil	AGE2680	17	ac68f6c9-7e45-48e3-b19a-9a0d4f5ade3f	1649852	59	F				12/19/2020	20:30	False	False	False			D	Death	01/20/2021	05:30		Uninformed	7	Death	No		2	32			TRUE	12/17/2020	D	Death	01/20/2021	5	Death	34	TRUE		1	Ward/Room	1
Epimed Monitor	General/Mixed	False	H1654	two	Public	Brazil	AGE2680	17	ac19c3a4-9ecf-4e09-bd1e-1ecdf7e6c4e9	1649530	57	M				12/19/2020	22:00	False	False	False			D	Death	12/30/2020	18:00		Uninformed	7	Death	No		7	11			TRUE	12/12/2020	D	Death	12/30/2020	5	Death	18	TRUE		1	Ward/Room	1
Epimed Monitor	General/Mixed	False	H1654	two	Public	Brazil	AGE2680	17	b722abd2-3459-44c8-ab51-51a7147effd8	428429	80	M				12/22/2020	22:00	False	False	False			D	Death	12/27/2020	14:30		Uninformed	7	Death	No		7	5			TRUE	15/12/2020	D	Death	12/27/2020	5	Death	12	TRUE		1	Ward/Room	1
Epimed Monitor	General/Mixed	False	H1654	two	Public	Brazil	AGE2680	17	b5c9525d-3b08-4fc1-b90f-917cf6abd983	1649758	85	M				12/23/2020	12:00 pm	False	False	False			D	Death	12/26/2020	21:30		Uninformed	7	Death	No		7	3			TRUE	12/16/2020	D	Death	12/26/2020	5	Death	10	TRUE		1	Ward/Room	1
Epimed Monitor	General/Mixed	False	H1654	two	Public	Brazil	AGE2680	17	b8c08717-7fb9-4c27-aa0d-7bdfac574c91	1650222	54	F	75	160	29.3	12/26/2020	15:08	False	False	False			D	Death	01/12/2021	06:30		Uninformed	7	Death	No		4	17			TRUE	12/22/2020	D	Death	01/12/2021	5	Death	21	TRUE	SUS (Unified Health System)	1	Ward/Room	1
Epimed Monitor	General/Mixed	False	H1654	two	Public	Brazil	AGE2680	17	df5bc5b4-2081-480b-88ea-add537ff6407	157368	73	M				12/30/2020	09:00	False	False	False			D	Death	05/01/2021	4:00 am		Uninformed	7	Death	No		4	6			TRUE	12/26/2020	D	Death	05/01/2021	5	Death	10	TRUE	SUS (Unified Health System)	1	Ward/Room	1
Epimed Monitor	General/Mixed	False	H1654	two	Public	Brazil	AGE2680	17	7ada5ab5-49d0-4896-baab-623e580417c5	1650776	72	M				12/30/2020	22:00	False	False	False			D	Death	01/12/2021	07:00		Uninformed	7	Death	No		0	13			TRUE	12/30/2020	D	Death	01/12/2021	5	Death	13	TRUE		6	Transfer from another hospital/institution	1
Epimed Monitor	General/Mixed	False	H1654	two	Public	Brazil	AGE2680	17	5d3d1f8f-110f-4b09-86cf-e3afa0f77f76	1649927	66	M				12/31/2020	02:00	False	False	False			A	High	01/06/2021	13:00	3	Uninformed	1	Ward or room	No		13	6			TRUE	12/18/2020	A	High	01/15/2021	1	Residence	28	TRUE		1	Ward/Room	1
Epimed Monitor	General/Mixed	False	H1654	two	Public	Brazil	AGE2680	17	adf6ac7a-051f-4977-a5a6-bde8237bebfc	1650775	69	M				12/31/2020	8 o'clock	False	False	False			D	Death	05/01/2021	18:00		Uninformed	7	Death	No		1	5			TRUE	12/30/2020	D	Death	05/01/2021	5	Death	6	TRUE		1	Ward/Room	1
Epimed Monitor	General/Mixed	False	H1654	two	Public	Brazil	AGE2680	17	d19cb61a-942b-4d07-b67d-55f747ce8025	1651462	85	M				09/01/2021	22:00	False	False	False			D	Death	01/22/2021	21:00		Uninformed	7	Death	No		1	13			TRUE	01/08/2021	D	Death	01/22/2021	5	Death	14	TRUE		1	Ward/Room	1
Epimed Monitor	General/Mixed	False	H1654	two	Public	Brazil	AGE2680	17	8eab2701-081d-4a3d-9231-c3a531411ba3	1651738	65	F				01/12/2021	23:30	False	False	False			A	High	01/16/2021	4:00 pm	6	Administrative reasons	1	Ward or room	No		0	4			TRUE	01/12/2021	A	High	01/22/2021	1	Residence	10	TRUE		6	Transfer from another hospital/institution	1
Epimed Monitor	General/Mixed	False	H1654	two	Public	Brazil	AGE2680	17	8080d1d2-045e-4a37-9b86-882dc138a793	179107	71	M				01/13/2021	10:00 am	False	False	False			A	High	01/14/2021	19:30	0	Uninformed	1	Ward or room	No		0	1			TRUE	01/13/2021	A	High	01/18/2021	1	Residence	5	TRUE		6	Transfer from another hospital/institution	1
Epimed Monitor	General/Mixed	False	H1654	two	Public	Brazil	AGE2680	17	98a910be-ab8c-493b-b05e-5846817b2b37	1651511	84	M				01/14/2021	12:00 pm	False	False	False			D	Death	01/14/2021	12:15		Uninformed	7	Death	No		4	1			TRUE	01/10/2021	D	Death	01/14/2021	5	Death	4	TRUE		1	Ward/Room	1
Epimed Monitor	General/Mixed	False	H1654	two	Public	Brazil	AGE2680	17	af08da53-9168-403a-8da6-b90b06483818	1651559	70	M				01/14/2021	17:00	False	False	False			D	Death	01/26/2021	21:20		Uninformed	7	Death	No		3	12			TRUE	01/11/2021	D	Death	01/26/2021	5	Death	15	TRUE		1	Ward/Room	1
Epimed Monitor	General/Mixed	False	H1654	two	Public	Brazil	AGE2680	17	e4181ef2-ef2c-4323-8b9b-344826b7fcb0	1651956	86	M				01/14/2021	22:45	False	False	False			D	Death	01/15/2021	05:30		Uninformed	7	Death	No		0	1			TRUE	01/14/2021	D	Death	01/15/2021	5	Death	1	TRUE		2	Emergency	1
Epimed Monitor	General/Mixed	False	H1654	two	Public	Brazil	AGE2680	17	eaa8a6b9-7848-4e0c-87f7-13634ff5cf8c	676842	83	F				01/15/2021	10:30	False	False	False			A	High	02/13/2021	13:30	3	Uninformed	1	Ward or room	No		0	29			TRUE	01/15/2021	A	High	02/21/2021	1	Residence	37	TRUE	SUS (Unified Health System)	6	Transfer from another hospital/institution	1
Epimed Monitor	General/Mixed	False	H1654	two	Public	Brazil	AGE2680	17	9d27cb15-68f2-4c51-ab4d-730f5e7375f3	1105286	48	M				01/15/2021	13:00	False	False	False			D	Death	02/05/2021	01:00		Uninformed	7	Death	No		0	21			TRUE	01/15/2021	D	Death	02/05/2021	5	Death	21	TRUE		6	Transfer from another hospital/institution	1
Epimed Monitor	General/Mixed	False	H1654	two	Public	Brazil	AGE2680	17	798dc0af-7137-499d-92c5-f4bef48782f4	61536	64	M				01/17/2021	12:00 pm	False	False	False			D	Death	01/21/2021	23:15		Uninformed	7	Death	No		0	4			TRUE	01/17/2021	D	Death	01/21/2021	5	Death	4	TRUE	SUS (Unified Health System)	6	Transfer from another hospital/institution	1
Epimed Monitor	General/Mixed	False	H1654	two	Public	Brazil	AGE2680	17	26ba9372-c585-40fb-8d9e-ad832c10cb31	1652097	89	F				01/17/2021	8:00 pm	False	False	False			D	Death	01/31/2021	09:10		Uninformed	7	Death	No		0	14			TRUE	01/17/2021	D	Death	01/31/2021	5	Death	14	TRUE		4	Another ICU/ICU in your hospital	1
Epimed Monitor	General/Mixed	False	H1654	two	Public	Brazil	AGE2680	17	ab1529f3-02b2-4e49-96a3-f91c9a64e5e0	1652222	67	M				01/19/2021	02:00	False	False	False			A	High	01/22/2021	15:00	3	Uninformed	1	Ward or room	No		0	3			TRUE	01/19/2021	A	High	01/24/2021	1	Residence	5	TRUE		6	Transfer from another hospital/institution	1
Epimed Monitor	General/Mixed	False	H1654	two	Public	Brazil	AGE2680	17	5603daff-649f-4cd1-8233-62d4cfd2d9f4	339849	88	F				01/21/2021	22:00	False	False	False			D	Death	02/02/2021	22:00		Uninformed	7	Death	No		1	12			TRUE	01/20/2021	D	Death	02/02/2021	5	Death	13	TRUE		1	Ward/Room	1
Epimed Monitor	General/Mixed	False	H1654	two	Public	Brazil	AGE2680	17	1e86c0b5-86b2-426a-8c71-bd1f127ced70	1652696	75	M				01/22/2021	18:20	False	False	False			D	Death	01/22/2021	19:00		Uninformed	7	Death	No		0	1			TRUE	01/22/2021	D	Death	01/22/2021	5	Death	1	TRUE		6	Transfer from another hospital/institution	1
Epimed Monitor	General/Mixed	False	H1654	two	Public	Brazil	AGE2680	17	69560bf5-6a35-4bc5-8d31-900a7a6a8128	333515	69	F				01/23/2021	8 o'clock	False	False	False			A	High	01/26/2021	23:00			3	Another hospital ICU/ICU	No		4	3			TRUE	01/19/2021	D	Death	02/07/2021	5	Death	19	TRUE		1	Ward/Room	1
Epimed Monitor	General/Mixed	False	H1654	two	Public	Brazil	AGE2680	17	e69fb6d0-dd76-41d8-a746-9e53d0374483	1106006	69	M				01/23/2021	13:00	False	False	False			D	Death	01/31/2021	19:00		Uninformed	7	Death	No		0	8			TRUE	01/23/2021	D	Death	01/31/2021	5	Death	8	TRUE		6	Transfer from another hospital/institution	1
Epimed Monitor	General/Mixed	False	H1654	two	Public	Brazil	AGE2680	17	592f1c89-ad91-4e1c-bc0e-60d9167b3dad	567205	63	F				01/23/2021	22:00	False	False	False			D	Death	02/17/2021	23:30		Uninformed	7	Death	No		7	25			TRUE	01/16/2021	D	Death	02/17/2021	5	Death	32	TRUE		1	Ward/Room	1
Epimed Monitor	General/Mixed	False	H1654	two	Public	Brazil	AGE2680	17	6c410661-69e9-45b6-802d-ee714061e719	111236	84	M				01/24/2021	10:00 am	False	False	False			A	High	01/26/2021	13:30	2	Uninformed	1	Ward or room	No		1	2			TRUE	01/23/2021	A	High	01/29/2021	1	Residence	6	TRUE		1	Ward/Room	1
Epimed Monitor	General/Mixed	False	H1654	two	Public	Brazil	AGE2680	17	71df10b1-d952-470a-b385-c986d56e6208	1652587	94	M				01/25/2021	11:00	False	False	False			D	Death	01/29/2021	23:35		Uninformed	7	Death	Yeah, don't step up	2021-01-27	370	4	2		TRUE	01/21/2020	D	Death	01/29/2021	5	Death	374	TRUE		1	Ward/Room	1
Epimed Monitor	General/Mixed	False	H1654	two	Public	Brazil	AGE2680	17	911af655-0df1-465e-a2d7-da264a01f530	1652821	58	M				01/25/2021	14:40	False	False	False			A	High	01/28/2021	17:00			3	Another hospital ICU/ICU	No		0	3			TRUE	01/25/2021	D	Death	02/15/2021	5	Death	21	TRUE		4	Another ICU/ICU in your hospital	1
Epimed Monitor	General/Mixed	False	H1654	two	Public	Brazil	AGE2680	17	b3ae31ff-84a0-407f-9328-efd72c89bc93	1652908	64	F				01/26/2021	17:00	False	False	False			D	Death	02/23/2021	14:15		Uninformed	7	Death	No		0	28			TRUE	01/26/2021	D	Death	02/23/2021	5	Death	28	TRUE		1	Ward/Room	1
Epimed Monitor	General/Mixed	False	H1654	two	Public	Brazil	AGE2680	17	7e6f7f1e-6f84-4331-9d5a-41d591293f6e	1653219	83	F				01/30/2021	11:00	False	False	False			D	Death	02/14/2021	8 o'clock		Uninformed	7	Death	No		1	15			TRUE	01/29/2021	D	Death	02/14/2021	5	Death	16	TRUE		1	Ward/Room	1
Epimed Monitor	General/Mixed	False	H1654	two	Public	Brazil	AGE2680	17	a6aa9cab-6e10-4380-a3e2-1a82a0eddcf3	752793	75	F				01/30/2021	14:30	False	False	False			A	High	02/05/2021	13:00	3	Uninformed	1	Ward or room	No		0	6			TRUE	01/30/2021	A	High	02/12/2021	1	Residence	13	TRUE		2	Emergency	1
Epimed Monitor	General/Mixed	False	H1654	two	Public	Brazil	AGE2680	17	22ab651f-e2ba-4e90-9672-a4e041751cd5	1653248	41	F				01/31/2021	20:30	False	False	False			A	High	02/15/2021	15:00	5	Uninformed	1	Ward or room	No		0	15			TRUE	01/31/2021	A	High	02/20/2021	1	Residence	20	TRUE		1	Ward/Room	1
Epimed Monitor	General/Mixed	False	H1654	two	Public	Brazil	AGE2680	17	67d9f49c-c8df-4eb7-b15a-bf4a8d157d05	1653390	72	M				02/01/2021	15:45	False	False	False			D	Death	02/16/2021	23:00		Uninformed	7	Death	No		0	15			TRUE	02/01/2021	D	Death	02/16/2021	5	Death	15	TRUE		4	Another ICU/ICU in your hospital	1
Epimed Monitor	General/Mixed	False	H1654	two	Public	Brazil	AGE2680	17	d839cbbb-0d3e-4391-b4a8-a4b6a42b4fac	1653671	82	F				02/03/2021	23:50	False	False	False			D	Death	02/17/2021	03:00		Uninformed	7	Death	No		0	14			TRUE	02/03/2021	D	Death	02/17/2021	5	Death	14	TRUE		2	Emergency	1
Epimed Monitor	General/Mixed	False	H1654	two	Public	Brazil	AGE2680	17	ba70b0e5-4584-4504-8730-ec73c3218314	1653761	40	M				02/04/2021	13:40	False	False	False			D	Death	02/09/2021	01:40		Uninformed	7	Death	No		0	5			TRUE	02/04/2021	D	Death	02/09/2021	5	Death	5	TRUE		4	Another ICU/ICU in your hospital	1
Epimed Monitor	General/Mixed	False	H1654	two	Public	Brazil	AGE2680	17	960faa79-5a84-44c7-bcad-89b978524f49	1653954	67	F				02/06/2021	8:00 pm	False	False	False			A	High	02/20/2021	11:30	1	Uninformed			No		0	14			False	02/06/2021	A	High	02/25/2021	1	Residence	19	TRUE		99	Other - Not specified	1
Epimed Monitor	General/Mixed	False	H1654	two	Public	Brazil	AGE2680	17	0403f20b-1288-4b02-a90c-47239cf8ef89	1653410	72	F				02/08/2021	10:30	False	False	False			D	Death	02/10/2021	23:30		Uninformed	7	Death	Yeah, don't step up	2021-02-08	7	2	0		TRUE	02/01/2021	D	Death	02/10/2021	5	Death	9	TRUE		1	Ward/Room	1
Epimed Monitor	General/Mixed	False	H1654	two	Public	Brazil	AGE2680	17	f55cf9d8-7300-4a55-b1eb-ae564adf3447	1654095	73	F				02/09/2021	08:30	False	False	False			D	Death	03/02/2021	09:15		Uninformed	7	Death	No		1	21			TRUE	02/08/2021	D	Death	03/02/2021	5	Death	22	TRUE		1	Ward/Room	1
Epimed Monitor	General/Mixed	False	H1654	two	Public	Brazil	AGE2680	17	03df5a1b-e173-414b-be6b-9d72609e6af7	755566	62	M				02/09/2021	4:00 pm	False	False	False			D	Death	02/22/2021	02:24		Uninformed	7	Death	No		0	13			TRUE	02/09/2021	D	Death	02/22/2021	5	Death	13	TRUE		2	Emergency	1
Epimed Monitor	General/Mixed	False	H1654	two	Public	Brazil	AGE2680	17	2bb2a7de-5fdf-4455-a0dc-d0359e86a58b	1654234	64	F				02/10/2021	15:44	False	False	False			D	Death	02/18/2021	22:30		Uninformed	7	Death	No		1	8			False	02/09/2021	D	Death	02/18/2021	5	Death	9	TRUE		1	Ward/Room	1
Epimed Monitor	General/Mixed	False	H1654	two	Public	Brazil	AGE2680	17	234debec-1fcc-44cb-8585-f6638f3a991a	1654246	72	M				02/12/2021	12:30	False	False	False			D	Death	02/23/2021	15:50		Uninformed	7	Death	No		3	11			False	02/09/2021	D	Death	02/23/2021	5	Death	14	TRUE		1	Ward/Room	1
Epimed Monitor	General/Mixed	False	H1654	two	Public	Brazil	AGE2680	17	8f0a643b-17cd-4fff-8182-6434d3587a99	1653665	90	F				02/12/2021	17:30	False	False	False			D	Death	02/14/2021	22:00		Uninformed	7	Death	No		9	2			TRUE	02/03/2021	D	Death	02/14/2021	5	Death	11	TRUE		1	Ward/Room	1
Epimed Monitor	General/Mixed	False	H1654	two	Public	Brazil	AGE2680	17	ee7badf2-0b33-46a2-abe2-d32eb50b7972	1654112	60	M				02/13/2021	16:30	False	False	False			D	Death	02/23/2021	06:00		Uninformed	7	Death	No		5	10			False	02/08/2021	D	Death	02/23/2021	5	Death	15	TRUE		1	Ward/Room	1
Epimed Monitor	General/Mixed	False	H1654	two	Public	Brazil	AGE2680	17	c4ad10b1-7b4a-4935-b45f-7636ec585a1f	1654250	55	F				02/14/2021	21:00	False	False	False			D	Death	03/07/2021	00:50		Uninformed	7	Death	No		5	21			False	02/09/2021	D	Death	03/07/2021	5	Death	26	TRUE		1	Ward/Room	1
Epimed Monitor	General/Mixed	False	H1654	two	Public	Brazil	AGE2680	17	c748d9b2-8711-405b-9980-b0c8057402a5	1654570	34	F				02/15/2021	23:00	False	False	False			D	Death	02/22/2021	02:00		Uninformed	7	Death	No		4	7			False	02/11/2021	D	Death	02/22/2021	5	Death	11	TRUE		1	Ward/Room	1
Epimed Monitor	General/Mixed	False	H1654	two	Public	Brazil	AGE2680	17	12f9d5b5-e120-4cd5-9957-87e3d42e702f	1655006	77	F				02/17/2021	18:50	False	False	False			D	Death	02/26/2021	00:26		Uninformed	7	Death	No		0	9			False	02/17/2021	D	Death	02/26/2021	5	Death	9	TRUE		2	Emergency	1
Epimed Monitor	General/Mixed	False	H1654	two	Public	Brazil	AGE2680	17	b43a74f0-385d-4abc-baef-eed6af43eab2	1654718	40	M				02/18/2021	15:30	False	False	False			D	Death	03/01/2021	19:30		Uninformed	7	Death	No		6	11			TRUE	02/12/2021	D	Death	03/01/2021	5	Death	17	TRUE		2	Emergency	1
Epimed Monitor	General/Mixed	False	H1654	two	Public	Brazil	AGE2680	17	6365ec3a-bc7f-4750-a203-543307ff9a2f	1653457	46	M				02/19/2021	18:00	TRUE	False	False			D	Death	03/04/2021	07:14		Uninformed	7	Death	No		17	13			TRUE	02/02/2021	D	Death	03/04/2021	5	Death	30	TRUE		1	Ward/Room	1
Epimed Monitor	General/Mixed	False	H1654	two	Public	Brazil	AGE2680	17	20b8c2b7-776d-4c8a-ba6c-91e399748ffb	1655515	54	F				02/21/2021	09:00	False	False	False			D	Death	03/22/2021	12:30		Uninformed	7	Death	No		2	29			TRUE	02/19/2021	D	Death	03/22/2021	5	Death	31	TRUE		2	Emergency	1
Epimed Monitor	General/Mixed	False	H1654	two	Public	Brazil	AGE2680	17	e1faaa1e-16f9-4ba7-82e7-d56868496e23	1655721	63	F				02/22/2021	15:40	False	False	False			D	Death	03/11/2021	16:40		Uninformed	7	Death	No		0	17			TRUE	02/22/2021	D	Death	03/11/2021	5	Death	17	TRUE		2	Emergency	1
Epimed Monitor	General/Mixed	False	H1654	two	Public	Brazil	AGE2680	17	a10c1cfc-e83e-4518-aa8a-56fc35944fb2	1655720	67	M				02/22/2021	18:00	False	False	False			A	High	03/01/2021	18:00	0	Uninformed	8	Residence	No		0	7			False	02/22/2021	A	High	03/01/2021	1	Residence	7	TRUE		2	Emergency	1
Epimed Monitor	General/Mixed	False	H1654	two	Public	Brazil	AGE2680	17	391cf0f5-f811-4aff-98f2-e8dd665c8776	1654745	75	F				02/23/2021	01:30	False	False	False			D	Death	02/26/2021	17:30		Uninformed	7	Death	No		9	3			TRUE	02/14/2021	D	Death	02/26/2021	5	Death	12	TRUE		1	Ward/Room	1
Epimed Monitor	General/Mixed	False	H1654	two	Public	Brazil	AGE2680	17	04b127cc-4152-4610-a1e0-8e31f4dcc169	1655567	65	M				02/23/2021	15:00	False	False	False			D	Death	03/01/2021	14:15		Uninformed	7	Death	No		2	6			TRUE	02/21/2021	D	Death	03/01/2021	5	Death	8	TRUE		1	Ward/Room	1
Epimed Monitor	General/Mixed	False	H1654	two	Public	Brazil	AGE2680	17	992ba451-1632-4580-8c83-40aa176bb695	16560003	34	M				02/24/2021	4:00 pm	False	False	False			D	Death	03/03/2021	8 o'clock		Uninformed	7	Death	No		0	7			TRUE	02/24/2021	D	Death	03/03/2021	5	Death	7	TRUE		6	Transfer from another hospital/institution	1
Epimed Monitor	General/Mixed	False	H1654	two	Public	Brazil	AGE2680	17	7ccc0112-dec4-418e-a888-23e3e9ce307a	1655141	55	F				02/26/2021	10:30	False	False	False			D	Death	03/03/2021	12:00 pm		Uninformed	7	Death	No		9	5			TRUE	02/17/2021	D	Death	03/03/2021	5	Death	14	TRUE		1	Ward/Room	1
Epimed Monitor	General/Mixed	False	H1654	two	Public	Brazil	AGE2680	17	505b2662-2168-41ed-96df-f6681a02e19f	1656289	48	M				02/26/2021	20:30	False	False	False			D	Death	03/09/2021	19:40		Uninformed	7	Death	No		0	11			TRUE	02/26/2021	D	Death	03/09/2021	5	Death	11	TRUE		2	Emergency	1
Epimed Monitor	General/Mixed	False	H1654	two	Public	Brazil	AGE2680	17	0aa13192-546d-400a-a404-d5f56a5c6a35	1656299	77	F				02/27/2021	00:45	False	False	False			D	Death	03/17/2021	18:45		Uninformed	7	Death	Yes, limit	2021-03-12	0	18	13		TRUE	02/27/2021	D	Death	03/17/2021	5	Death	18	TRUE		2	Emergency	1
Epimed Monitor	General/Mixed	False	H1654	two	Public	Brazil	AGE2680	17	a5591ca6-4131-420d-b809-af48ef268343	1655718	82	M				02/27/2021	4:00 pm	False	False	False			D	Death	03/06/2021	17:30		Uninformed	7	Death	No		5	7			TRUE	02/22/2021	D	Death	03/06/2021	5	Death	12	TRUE	SUS (Unified Health System)	1	Ward/Room	1
Epimed Monitor	General/Mixed	False	H1654	two	Public	Brazil	AGE2680	17	0f289c55-a0e9-4c6a-9776-e668b65b2611	1656326	51	M				02/28/2021	12:00 pm	False	False	False			D	Death	03/12/2021	07:55		Uninformed	7	Death	No		0	12			TRUE	02/28/2021	D	Death	03/12/2021	5	Death	12	TRUE		2	Emergency	1
Epimed Monitor	General/Mixed	False	H1654	two	Public	Brazil	AGE2680	17	4e34b7cf-f11b-48a0-87b2-fc32fc5ca87e	1656471	65	M				03/01/2021	19:15	False	False	False			A	High	03/09/2021	14:20	3	Uninformed	1	Ward or room	No		0	8			TRUE	03/01/2021	A	High	03/22/2021	1	Residence	21	TRUE		6	Transfer from another hospital/institution	1
Epimed Monitor	General/Mixed	False	H1654	two	Public	Brazil	AGE2680	17	b0cdc430-ff89-4c80-9912-3c35c15179d6	1656564	71	F				03/02/2021	14:15	False	False	False			D	Death	03/11/2021	14:50		Uninformed	7	Death	No		0	9			TRUE	03/02/2021	D	Death	03/11/2021	5	Death	9	TRUE		6	Transfer from another hospital/institution	1
Epimed Monitor	General/Mixed	False	H1654	two	Public	Brazil	AGE2680	17	302062f0-0b37-496a-9199-86cd2ceef743	1656482	55	F				03/02/2021	17:30	False	False	False			D	Death	03/12/2021	10:35		Uninformed	7	Death	No		0	10			TRUE	03/02/2021	D	Death	03/12/2021	5	Death	10	TRUE		2	Emergency	1
Epimed Monitor	General/Mixed	False	H1654	two	Public	Brazil	AGE2680	17	499f0608-9e1d-45dc-870f-337e379f3501	1656591	51	M				03/02/2021	21:30	False	False	False			D	Death	03/06/2021	10:40		Uninformed	7	Death	No		0	4			TRUE	03/02/2021	D	Death	03/06/2021	5	Death	4	TRUE		2	Emergency	1
Epimed Monitor	General/Mixed	False	H1654	two	Public	Brazil	AGE2680	17	5f9db198-1c3e-43f2-b449-357f978ed70c	1656590	70	F				03/02/2021	21:30	False	False	False			D	Death	03/05/2021	06:00		Uninformed	7	Death	No		0	3			TRUE	03/02/2021	D	Death	03/05/2021	5	Death	3	TRUE		2	Emergency	1
Epimed Monitor	General/Mixed	False	H1654	two	Public	Brazil	AGE2680	17	c5f7f659-12bd-439b-9001-6e1dd1a18262	1656713	64	M				03/03/2021	20:03	False	False	False			A	High	03/08/2021	15:05	4	No bed availability in the destination unit	1	Ward or room	No		0	5			TRUE	03/03/2021	A	High	03/13/2021	1	Residence	10	TRUE		6	Transfer from another hospital/institution	1
Epimed Monitor	General/Mixed	False	H1654	two	Public	Brazil	AGE2680	17	bdfc3057-2799-46b4-b3db-cf52989ff4be	1656332	53	M				03/04/2021	14:30	False	False	False			D	Death	03/05/2021	15:30		Uninformed	7	Death	No		4	1			TRUE	02/28/2021	D	Death	03/05/2021	5	Death	5	TRUE		1	Ward/Room	1
Epimed Monitor	General/Mixed	False	H1654	two	Public	Brazil	AGE2680	17	23b2523e-f288-417a-892a-7f5463c7fbdf	1656522	64	M				03/04/2021	17:30	False	False	False			D	Death	03/13/2021	10:00 am		Uninformed	7	Death	No		0	9			TRUE	03/04/2021	D	Death	03/13/2021	5	Death	9	TRUE		2	Emergency	1
Epimed Monitor	General/Mixed	False	H1654	two	Public	Brazil	AGE2680	17	fe06120a-876d-4870-b5b5-d5c4a62c5ba0	1656867	74	M				03/05/2021	17:00	False	False	False			A	High	03/21/2021	13:28			3	Another hospital ICU/ICU	No		0	16			TRUE	03/05/2021	D	Death	04/03/2021	5	Death	29	TRUE		2	Emergency	1
Epimed Monitor	General/Mixed	False	H1654	two	Public	Brazil	AGE2680	17	290d7a3e-3dd2-4eb3-b491-bba917ec0cc7	1656861	68	F				03/05/2021	21:00	False	False	False			D	Death	03/11/2021	21:30		Uninformed	7	Death	No		0	6			TRUE	03/05/2021	D	Death	03/11/2021	5	Death	6	TRUE		1	Ward/Room	1
Epimed Monitor	General/Mixed	False	H1654	two	Public	Brazil	AGE2680	17	f693a961-057e-47f1-be2f-d5eacba82df1	1656864	68	M				03/06/2021	15:00	False	False	False			D	Death	03/20/2021	21:13		Uninformed	7	Death	No		1	14			TRUE	03/05/2021	D	Death	03/20/2021	5	Death	15	TRUE		1	Ward/Room	1
Epimed Monitor	General/Mixed	False	H1654	two	Public	Brazil	AGE2680	17	a9cb851b-5627-4204-9e59-9a44e6fe92aa	1656902	76	F				03/07/2021	01:35	False	False	False			D	Death	03/18/2021	05:30		Uninformed	7	Death	No		0	11			TRUE	03/07/2021	D	Death	03/18/2021	5	Death	11	TRUE		1	Ward/Room	1
Epimed Monitor	General/Mixed	TRUE	H1654	two	Public	Brazil	AGE2680	17	4e2524fe-8aad-4a70-b004-c136d5940f24	1656909	49	M				03/07/2021	14:15	False	False	False			D	Death	03/07/2021	15:35		Uninformed	7	Death	No		0	1			TRUE	03/07/2021	D	Death	03/07/2021	5	Death	1	TRUE		6	Transfer from another hospital/institution	1
Epimed Monitor	General/Mixed	False	H1654	two	Public	Brazil	AGE2680	17	0a233eff-f70c-4b20-bef6-d46b7bb833df	1656834	54	M				03/07/2021	22:40	False	False	False			A	High	03/16/2021	14:00	3	Uninformed	1	Ward or room	No		3	9			TRUE	03/04/2021	A	High	03/26/2021	1	Residence	22	TRUE	SUS (Unified Health System)	1	Ward/Room	1
Epimed Monitor	General/Mixed	False	H1654	two	Public	Brazil	AGE2680	17	b015039e-6496-4a26-bd59-1afd0b89335e	16535538	56	M				03/08/2021	17:00	TRUE	False	False			A	High	04/07/2021	10:00 am	3	Uninformed			No		16	30			TRUE	02/20/2021	A	High	04/17/2021	1	Residence	56	TRUE		1	Ward/Room	1
Epimed Monitor	General/Mixed	False	H1654	two	Public	Brazil	AGE2680	17	584df6c6-bbdd-436f-a509-1d4c62251bcc	1656986	47	M				03/08/2021	21:00	False	False	False			D	Death	03/18/2021	22:45		Uninformed	7	Death	No		0	10			TRUE	03/08/2021	D	Death	03/18/2021	5	Death	10	TRUE		2	Emergency	1
Epimed Monitor	General/Mixed	False	H1654	two	Public	Brazil	AGE2680	17	ca942a27-40a2-4ddb-957e-2175468b7620	1656995	59	M				03/08/2021	23:50	False	False	False			D	Death	03/18/2021	08:30		Uninformed	7	Death	No		0	10			TRUE	03/08/2021	D	Death	03/18/2021	5	Death	10	TRUE		1	Ward/Room	1
Epimed Monitor	General/Mixed	False	H1654	two	Public	Brazil	AGE2680	17	423958ca-4ff2-446a-808e-fbd04853b079	1657019	30	F				03/10/2021	18:00	False	False	False			D	Death	04/01/2021	23:30		Uninformed	7	Death	No		1	22			TRUE	03/09/2021	D	Death	04/01/2021	5	Death	23	TRUE		1	Ward/Room	1
Epimed Monitor	General/Mixed	False	H1654	two	Public	Brazil	AGE2680	17	fccd7fa2-f9a1-4afe-9282-494acafd2e6c	260355	38	M				03/11/2021	23:00	False	False	False			D	Death	03/17/2021	15:30		Uninformed	7	Death	No		2	6			TRUE	03/09/2021	D	Death	03/17/2021	5	Death	8	TRUE		1	Ward/Room	1
Epimed Monitor	General/Mixed	False	H1654	two	Public	Brazil	AGE2680	17	6ecfa2a3-34c7-4121-80ef-4eb2e04ef8de	177386	76	F				03/12/2021	4:00 pm	False	False	False			A	High	03/19/2021	4:00 pm	4	Uninformed	1	Ward or room	No		5	7			False	03/07/2021	A	High	03/29/2021	1	Residence	22	TRUE		1	Ward/Room	1
Epimed Monitor	General/Mixed	False	H1654	two	Public	Brazil	AGE2680	17	714557bb-594f-499c-9e9d-7ad15039643c	1110452	40	F				03/12/2021	20:45	False	False	False			A	High	03/15/2021	14:00	3	Uninformed	1	Ward or room	No		17	3			TRUE	02/23/2021	A	High	04/08/2021	1	Residence	44	TRUE		1	Ward/Room	1
Epimed Monitor	General/Mixed	False	H1654	two	Public	Brazil	AGE2680	17	dbd8bb9e-172a-48fb-bb41-5c62c349c6ae	1208	40	M				03/12/2021	21:00	False	False	False			D	Death	03/14/2021	00:50		Uninformed	7	Death	No		0	2			TRUE	03/12/2021	D	Death	03/14/2021	5	Death	2	TRUE		6	Transfer from another hospital/institution	1
Epimed Monitor	General/Mixed	False	H1654	two	Public	Brazil	AGE2680	17	56041d33-6c97-44e8-abca-afedc51f3096	1112174	44	F				03/12/2021	21:10	False	False	False			D	Death	03/15/2021	22:15		Uninformed	7	Death	No		0	3			TRUE	03/12/2021	D	Death	03/15/2021	5	Death	3	TRUE		6	Transfer from another hospital/institution	1
Epimed Monitor	General/Mixed	False	H1654	two	Public	Brazil	AGE2680	17	9c1f8b51-5005-47ee-89e9-96247da888e4	1657359	41	M				03/13/2021	4:00 pm	False	False	False			D	Death	03/19/2021	04:50		Uninformed	7	Death	No		1	6			TRUE	03/12/2021	D	Death	03/19/2021	5	Death	7	TRUE		1	Ward/Room	1
Epimed Monitor	General/Mixed	False	H1654	two	Public	Brazil	AGE2680	17	e00d3a6d-1bdf-4064-8e9e-f1c42da33dec	1657445	43	M	100	175	32.7	03/14/2021	12:38	False	False	False			A	High	03/14/2021	22:49			3	Another hospital ICU/ICU	No		0	1			TRUE	03/14/2021	D	Death	03/20/2021	5	Death	6	TRUE	SUS (Unified Health System)	2	Emergency	1
Epimed Monitor	General/Mixed	False	H1654	two	Public	Brazil	AGE2680	17	ed006994-56a0-44de-8847-629eaa3e91af	1657154	50	M				03/14/2021	22:30	False	False	False			A	High	04/04/2021	11:00	3	Uninformed	1	Ward or room	No		4	21			TRUE	03/10/2021	A	High	04/24/2021	3	Another hospital	45	TRUE		1	Ward/Room	1
Epimed Monitor	General/Mixed	False	H1654	two	Public	Brazil	AGE2680	17	4be614b4-e384-4bf6-a774-bed9a8a52607	767461	69	F				03/16/2021	15:30	False	False	False			D	Death	03/17/2021	01:50		Uninformed	7	Death	No		29	1			TRUE	02/15/2021	D	Death	03/17/2021	5	Death	30	TRUE		1	Ward/Room	1
Epimed Monitor	General/Mixed	False	H1654	two	Public	Brazil	AGE2680	17	76651bf0-726c-41c3-aa9c-21e3201d038d	1657775	50	M				03/16/2021	20:38	False	False	False			A	High	03/25/2021	19:16	7	Uninformed	1	Ward or room	No		0	9			TRUE	03/16/2021	A	High	04/04/2021	1	Residence	19	TRUE		1	Ward/Room	1
Epimed Monitor	General/Mixed	False	H1654	two	Public	Brazil	AGE2680	17	2dc3c042-efb5-42e9-9341-05d5d8f8ac45	1657782	56	F				03/16/2021	21:10	False	False	False			D	Death	03/27/2021	09:10		Uninformed	7	Death	No		0	11			TRUE	03/16/2021	D	Death	03/27/2021	5	Death	11	TRUE		2	Emergency	1
Epimed Monitor	General/Mixed	False	H1654	two	Public	Brazil	AGE2680	17	c4ad59fc-7b14-4dd0-ae4f-d6f618f6d733	1656920	52	M				03/16/2021	23:00	False	False	False			D	Death	03/21/2021	09:45		Uninformed	7	Death	No		9	5			TRUE	03/07/2021	D	Death	03/21/2021	5	Death	14	TRUE		1	Ward/Room	1
Epimed Monitor	General/Mixed	False	H1654	two	Public	Brazil	AGE2680	17	7295f85d-14b6-440a-a50a-b81473d5b70f	1657840	56	M				03/16/2021	23:15	False	False	False			A	High	03/29/2021	13:00	4	Uninformed	1	Ward or room	No		0	13			TRUE	03/16/2021	A	High	04/02/2021	1	Residence	17	TRUE		1	Ward/Room	1
Epimed Monitor	General/Mixed	False	H1654	two	Public	Brazil	AGE2680	17	9cc46131-661a-4314-8671-f49e1d3344e0	264871	48	M				03/17/2021	12:00 pm	TRUE	False	False			D	Death	03/18/2021	19:10		Uninformed	7	Death	No		26	1			TRUE	02/19/2021	D	Death	03/18/2021	5	Death	27	TRUE		1	Ward/Room	1
Epimed Monitor	General/Mixed	False	H1654	two	Public	Brazil	AGE2680	17	4e8dabd8-bfc3-48f8-8364-99df482ebeb7	1657893	52	M				03/17/2021	17:50	False	False	False			A	High	04/08/2021	11:00	3	Uninformed	1	Ward or room	No		0	22			TRUE	03/17/2021	A	High	04/15/2021	1	Residence	29	TRUE		2	Emergency	1
Epimed Monitor	General/Mixed	False	H1654	two	Public	Brazil	AGE2680	17	0672af6f-858e-4451-8a99-453b4adbbd06	1657904	83	F				03/17/2021	21:00	False	False	False			A	High	03/29/2021	13:00	4	Uninformed	1	Ward or room	No		0	12			TRUE	03/17/2021	A	High	04/19/2021	1	Residence	33	TRUE	SUS (Unified Health System)	6	Transfer from another hospital/institution	1
Epimed Monitor	General/Mixed	False	H1654	two	Public	Brazil	AGE2680	17	6e3f6fae-f632-491e-8432-3902d9bfa980	1657898	64	M				03/17/2021	22:30	False	False	False			D	Death	03/26/2021	23:30		Uninformed	7	Death	No		0	9			TRUE	03/17/2021	D	Death	03/26/2021	5	Death	9	TRUE		1	Ward/Room	1
Epimed Monitor	General/Mixed	False	H1654	two	Public	Brazil	AGE2680	17	674e68f5-b2de-4581-9303-932b585e4890	1449892	50	M				03/18/2021	16:10	False	False	False			D	Death	03/18/2021	21:50		Uninformed	7	Death	No		0	1			TRUE	03/18/2021	D	Death	03/18/2021	5	Death	1	TRUE	SUS (Unified Health System)	2	Emergency	1
Epimed Monitor	General/Mixed	False	H1654	two	Public	Brazil	AGE2680	17	967a12cf-620e-4234-a82c-6fe808cbf9ce	1658043	64	M				03/19/2021	01:10	False	False	False			D	Death	03/23/2021	23:50		Uninformed	7	Death	No		0	4			TRUE	03/19/2021	D	Death	03/23/2021	5	Death	4	TRUE		2	Emergency	1
Epimed Monitor	General/Mixed	False	H1654	two	Public	Brazil	AGE2680	17	a939dc14-edb1-47be-b18f-2d051449c459	1658110	69	M				03/19/2021	12:53	False	False	False			D	Death	04/03/2021	18:05		Uninformed	7	Death	No		0	15			TRUE	03/19/2021	D	Death	04/03/2021	5	Death	15	TRUE		2	Emergency	1
Epimed Monitor	General/Mixed	False	H1654	two	Public	Brazil	AGE2680	17	390f0a86-6323-44af-9bc5-b552ee5f60d7	1657783	84	M				03/19/2021	21:00	False	False	False			D	Death	03/21/2021	19:30		Uninformed	7	Death	No		3	2			False	03/16/2021	D	Death	03/21/2021	5	Death	5	TRUE		1	Ward/Room	1
Epimed Monitor	General/Mixed	False	H1654	two	Public	Brazil	AGE2680	17	12c672ff-d542-42c2-9b39-f66c0636a8e4	1658193	67	M				03/20/2021	15:41	False	False	False			D	Death	03/26/2021	06:40		Uninformed	7	Death	No		0	6			TRUE	03/20/2021	D	Death	03/26/2021	5	Death	6	TRUE		1	Ward/Room	1
Epimed Monitor	General/Mixed	False	H1654	two	Public	Brazil	AGE2680	17	d967687e-3124-4cfe-8a37-849da8368db3	1657419	82	M				03/20/2021	15:42	False	False	False			D	Death	03/25/2021	09:40		Uninformed	7	Death	No		7	5			TRUE	03/13/2021	D	Death	03/25/2021	5	Death	12	TRUE	SUS (Unified Health System)	1	Ward/Room	1
Epimed Monitor	General/Mixed	False	H1654	two	Public	Brazil	AGE2680	17	772b016d-254e-47d8-b2ae-cd860ca23e7d	1658201	52	F				03/20/2021	18:50	False	False	False			D	Death	04/11/2021	22:10		Uninformed	7	Death	No		0	22			TRUE	03/20/2021	D	Death	04/11/2021	5	Death	22	TRUE	SUS (Unified Health System)	2	Emergency	1
Epimed Monitor	General/Mixed	False	H1654	two	Public	Brazil	AGE2680	17	61b4f11a-7bcc-41c2-9aa4-a2aaf2afe88d	1658021	41	M				03/21/2021	21:30	False	False	False			D	Death	04/16/2021	05:00		Uninformed	7	Death	No		3	26			TRUE	03/18/2021	D	Death	04/16/2021	5	Death	29	TRUE	SUS (Unified Health System)	1	Ward/Room	1
Epimed Monitor	General/Mixed	False	H1654	two	Public	Brazil	AGE2680	17	a855ba15-e89f-45cd-8a5c-afe85f0421db	1658904	53	M				03/22/2021	20:30	False	False	False			D	Death	04/05/2021	23:10		Uninformed	7	Death	No		0	14			TRUE	03/22/2021	D	Death	04/05/2021	5	Death	14	TRUE		2	Emergency	1
Epimed Monitor	General/Mixed	False	H1654	two	Public	Brazil	AGE2680	17	d3887c83-7116-488b-b949-602afde38fd9	1657621	75	F				03/25/2021	12:27	False	False	False			A	High	04/06/2021	15:00	5	Waiting for family	1	Ward or room	No		10	12			TRUE	03/15/2021	D	Death	04/17/2021	5	Death	33	TRUE		2	Emergency	1
Epimed Monitor	General/Mixed	False	H1654	two	Public	Brazil	AGE2680	17	ea5bb7ff-337e-4473-acaa-4eae168c3d7a	1658697	58	F				03/25/2021	12:38	False	False	False			D	Death	03/31/2021	19:47		Uninformed	7	Death	Yes, limit	2021-03-27	1	6	2		TRUE	03/24/2021	D	Death	03/31/2021	5	Death	7	TRUE		1	Ward/Room	1
Epimed Monitor	General/Mixed	False	H1654	two	Public	Brazil	AGE2680	17	70cabc60-6cfe-4b42-862a-6318540a9d49	1658792	78	F				03/25/2021	14:34	False	False	False			D	Death	03/26/2021	04:32		Uninformed	7	Death	No		0	1			TRUE	03/25/2021	D	Death	03/26/2021	5	Death	1	TRUE		2	Emergency	1
Epimed Monitor	General/Mixed	False	H1654	two	Public	Brazil	AGE2680	17	9b513cc3-dbe2-4382-82ac-b3460c2ec04a	1659002	35	F				03/26/2021	12:35	False	False	False			A	High	04/04/2021	12:30	2	Uninformed	1	Ward or room	No		0	9			TRUE	03/26/2021	A	High	04/08/2021	1	Residence	13	TRUE		2	Emergency	1
Epimed Monitor	General/Mixed	False	H1654	two	Public	Brazil	AGE2680	17	05d7cdf3-b875-41f4-a7ad-a42738cac0e0	16599029	34	F				03/27/2021	12:30	False	False	False			A	High	04/17/2021	18:40	0	Uninformed	1	Ward or room	No		0	21			TRUE	03/27/2021	A	High	04/26/2021	1	Residence	30	TRUE		2	Emergency	1
Epimed Monitor	General/Mixed	False	H1654	two	Public	Brazil	AGE2680	17	3c12738b-18fe-4f9c-b7a6-8a59c60e7aa0	1659048	51	F				03/27/2021	16:30	False	False	False			D	Death	04/10/2021	10:40		Uninformed	7	Death	No		0	14			TRUE	03/27/2021	D	Death	04/10/2021	5	Death	14	TRUE		2	Emergency	1
Epimed Monitor	General/Mixed	False	H1654	two	Public	Brazil	AGE2680	17	adc46b26-7522-4618-97dd-f2f7eefea9cd	1659256	35	M				03/29/2021	22:20	False	False	False			D	Death	04/25/2021	10:00 am		Uninformed	7	Death	No		0	27			TRUE	03/29/2021	D	Death	04/25/2021	5	Death	27	TRUE	SUS (Unified Health System)	1	Ward/Room	1
Epimed Monitor	General/Mixed	False	H1654	two	Public	Brazil	AGE2680	17	f75500e2-2844-4b4a-864b-85e342c1abe0	1659260	77	F				03/30/2021	18:21	False	False	False			D	Death	04/08/2021	05:05		Uninformed	7	Death	No		0	9			TRUE	03/30/2021	D	Death	04/08/2021	5	Death	9	TRUE		2	Emergency	1
Epimed Monitor	General/Mixed	False	H1654	two	Public	Brazil	AGE2680	17	5fb3533e-88a3-4b67-bb5f-cb46e13f8702	1659522	68	F				03/31/2021	19:50	False	False	False			D	Death	04/03/2021	16:30		Uninformed	7	Death	No		0	3			TRUE	03/31/2021	D	Death	04/03/2021	5	Death	3	TRUE		2	Emergency	1
Epimed Monitor	General/Mixed	False	H1654	two	Public	Brazil	AGE2680	17	58111fe4-aec0-400f-8983-c44302569b15	1659375	56	F				04/01/2021	10:36	False	False	False			D	Death	04/06/2021	19:00		Uninformed	7	Death	No		2	5			TRUE	03/30/2021	D	Death	04/06/2021	5	Death	7	TRUE		1	Ward/Room	1
Epimed Monitor	General/Mixed	False	H1654	two	Public	Brazil	AGE2680	17	0ae7009a-f59a-4489-8e34-0e6c27c4822e	1659399	48	F				04/02/2021	02:30	False	False	False			A	High	04/13/2021	15:20	4	No bed availability in the destination unit	1	Ward or room	No		3	11			TRUE	03/30/2021	A	High	04/19/2021	1	Residence	20	TRUE	SUS (Unified Health System)	1	Ward/Room	1
Epimed Monitor	General/Mixed	False	H1654	two	Public	Brazil	AGE2680	17	67c283a5-02e1-446e-90f2-370fd6da8ef6	1659776	74	F				04/03/2021	21:50	False	False	False			D	Death	04/11/2021	01:10		Uninformed	7	Death	No		0	8			TRUE	04/03/2021	D	Death	04/11/2021	5	Death	8	TRUE		2	Emergency	1
Epimed Monitor	General/Mixed	False	H1654	two	Public	Brazil	AGE2680	17	e3db048d-96fc-4594-968b-8cad84d26198	165918	52	F				04/04/2021	20:30	False	False	False			D	Death	04/27/2021	21:20		Uninformed	7	Death	No		4	23			TRUE	03/31/2021	D	Death	04/27/2021	5	Death	27	TRUE	SUS (Unified Health System)	1	Ward/Room	1
Epimed Monitor	General/Mixed	False	H1654	two	Public	Brazil	AGE2680	17	af582a7b-ee46-4e5f-aec9-87b9578f7105	190139	62	M				04/04/2021	21:10	False	False	False			D	Death	04/07/2021	15:10		Uninformed	7	Death	No		10	3			TRUE	03/25/2021	D	Death	04/07/2021	5	Death	13	TRUE		2	Emergency	1
Epimed Monitor	General/Mixed	False	H1654	two	Public	Brazil	AGE2680	17	5124ae35-5a31-4ce8-b4cf-fcbb9d3e8a2c	246436	75	F				04/04/2021	22:50	False	False	False			D	Death	04/17/2021	04:30		Uninformed	7	Death	No		0	13			TRUE	04/04/2021	D	Death	04/17/2021	5	Death	13	TRUE	SUS (Unified Health System)	6	Transfer from another hospital/institution	1
Epimed Monitor	General/Mixed	False	H1654	two	Public	Brazil	AGE2680	17	82b202bb-75a0-4d53-8b89-b9abef0a034a	1659813	66	M				04/06/2021	02:30	False	False	False			D	Death	04/23/2021	19:05		Uninformed	7	Death	No		2	17			TRUE	04/04/2021	D	Death	04/23/2021	5	Death	19	TRUE		1	Ward/Room	1
Epimed Monitor	General/Mixed	False	H1654	two	Public	Brazil	AGE2680	17	4553c910-e0f7-47f9-8546-c73996efcee4	1659981	59	M				04/06/2021	18:00	False	False	False			D	Death	04/25/2021	07:20		Uninformed	7	Death	No		1	19			TRUE	04/05/2021	D	Death	04/25/2021	5	Death	20	TRUE	SUS (Unified Health System)	1	Ward/Room	1
Epimed Monitor	General/Mixed	False	H1654	two	Public	Brazil	AGE2680	17	d6c984cb-67e0-4f7b-93fb-782d706ee29e	1660307	59	M				04/07/2021	14:15	False	False	False			D	Death	04/09/2021	06:00		Uninformed	7	Death	No		0	2			TRUE	04/07/2021	D	Death	04/09/2021	5	Death	2	TRUE		2	Emergency	1
Epimed Monitor	General/Mixed	False	H1654	two	Public	Brazil	AGE2680	17	9c9ac52a-dce3-4116-94bd-052c03a92380	1659701	64	M				04/07/2021	20:45	False	False	False			D	Death	04/10/2021	09:10		Uninformed	7	Death	No		5	3			TRUE	04/02/2021	D	Death	04/10/2021	5	Death	8	TRUE		1	Ward/Room	1
Epimed Monitor	General/Mixed	False	H1654	two	Public	Brazil	AGE2680	17	11f1781e-208f-4764-b03d-ccecf95e58c4	1660361	47	M				04/07/2021	23:20	False	False	False			A	High	04/24/2021	12:15	2	Uninformed			No		0	17			TRUE	04/07/2021	A	High	05/03/2021	1	Residence	26	TRUE		6	Transfer from another hospital/institution	1
Epimed Monitor	General/Mixed	False	H1654	two	Public	Brazil	AGE2680	17	88c43fa6-1003-4ea2-b411-c0fa1c906bb4	1660480	74	F				04/08/2021	15:30	False	False	False			A	High	04/24/2021	20:30	4	Uninformed	1	Ward or room	No		0	16			TRUE	04/08/2021	A	High	04/30/2021	1	Residence	22	TRUE	SUS (Unified Health System)	6	Transfer from another hospital/institution	1
Epimed Monitor	General/Mixed	False	H1654	two	Public	Brazil	AGE2680	17	e80a8911-55ec-456a-90c3-8b7605a28acc	1660135	40	M				04/09/2021	11:30	False	False	False			D	Death	04/17/2021	07:50		Uninformed	7	Death	No		3	8			TRUE	04/06/2021	D	Death	04/17/2021	5	Death	11	TRUE		1	Ward/Room	1
Epimed Monitor	General/Mixed	False	H1654	two	Public	Brazil	AGE2680	17	b75c78b6-8311-45f5-9452-ecacb35409f4	1660672	39	M				04/09/2021	21:00	False	False	False			D	Death	04/16/2021	14:40		Uninformed	7	Death	No		0	7			TRUE	04/09/2021	D	Death	04/16/2021	5	Death	7	TRUE	SUS (Unified Health System)	2	Emergency	1
Epimed Monitor	General/Mixed	False	H1654	two	Public	Brazil	AGE2680	17	5170f415-f437-467f-ad8c-9de303efc826	1659539	65	F				04/10/2021	11:00	False	False	False			D	Death	04/24/2021	01:40		Uninformed	7	Death	No		10	14			TRUE	03/31/2021	D	Death	04/24/2021	5	Death	24	TRUE	SUS (Unified Health System)	1	Ward/Room	1
Epimed Monitor	General/Mixed	False	H1654	two	Public	Brazil	AGE2680	17	1287c67e-983e-4636-8e2a-6204b01763e1	1660151	65	M				04/10/2021	11:00	False	False	False			D	Death	04/24/2021	03:45		Uninformed	7	Death	No		4	14			TRUE	04/06/2021	D	Death	04/24/2021	5	Death	18	TRUE		1	Ward/Room	1
Epimed Monitor	General/Mixed	False	H1654	two	Public	Brazil	AGE2680	17	8dcfe65d-d1a9-4c0f-b251-768dbc6f4008	1660497	73	F				04/11/2021	22:00	False	False	False			D	Death	04/26/2021	10:45		Uninformed	7	Death	No		3	15			TRUE	04/08/2021	D	Death	04/26/2021	5	Death	18	TRUE		1	Ward/Room	1
Epimed Monitor	General/Mixed	False	H1654	two	Public	Brazil	AGE2680	17	28474f53-7715-42e3-a78c-057b4901b2c7	1660760	66	F				04/12/2021	15:00	False	False	False			A	High	04/27/2021	14:21	4	No bed availability in the destination unit	1	Ward or room	No		1	15			TRUE	04/11/2021	A	High	05/07/2021	1	Residence	26	TRUE		1	Ward/Room	1
Epimed Monitor	General/Mixed	False	H1654	two	Public	Brazil	AGE2680	17	0ababf7b-9d6e-4579-9243-3151812b01aa	1660321	57	M				04/13/2021	18:00	False	False	False			D	Death	04/22/2021	20:50		Uninformed	7	Death	No		6	9			TRUE	04/07/2021	D	Death	04/22/2021	5	Death	15	TRUE	SUS (Unified Health System)	1	Ward/Room	1
Epimed Monitor	General/Mixed	False	H1654	two	Public	Brazil	AGE2680	17	6ee8807d-f3d9-4e7a-b728-1659eb5a9797	1659756	73	M				04/16/2021	17:53	False	False	False			D	Death	04/19/2021	06:00		Uninformed	7	Death	No		13	3			TRUE	04/03/2021	D	Death	04/19/2021	5	Death	16	TRUE		1	Ward/Room	1
Epimed Monitor	General/Mixed	False	H1654	two	Public	Brazil	AGE2680	17	0c8f1a44-c739-4723-857c-2fd3041555aa	1661470	72	F				04/16/2021	20:36	False	False	False			D	Death	04/27/2021	02:00		Uninformed	7	Death	No		1	11			TRUE	04/15/2021	D	Death	04/27/2021	5	Death	12	TRUE		1	Ward/Room	1
Epimed Monitor	General/Mixed	False	H1654	two	Public	Brazil	AGE2680	17	6de27e22-051f-46ae-891e-ef5e50fa19ad	1661113	52	M				04/17/2021	17:15	False	False	False			D	Death	05/03/2021	4:00 pm		Uninformed	7	Death	No		4	16			TRUE	04/13/2021	D	Death	05/03/2021	5	Death	20	TRUE		1	Ward/Room	1
Epimed Monitor	General/Mixed	False	H1654	two	Public	Brazil	AGE2680	17	1611a305-3ac7-44b5-a1c7-eab0e7bbc8b3	1661721	70	F				04/18/2021	14:40	False	False	False			D	Death	05/04/2021	00:20		Uninformed	7	Death	No		0	16			TRUE	04/18/2021	D	Death	05/04/2021	5	Death	16	TRUE		2	Emergency	1
Epimed Monitor	General/Mixed	False	H1654	two	Public	Brazil	AGE2680	17	a2358f35-4c32-4dc0-aa30-467056c7f7b8	1661634	66	M				04/20/2021	15:00	False	False	False			D	Death	05/06/2021	06:00		Uninformed	7	Death	No		4	16			TRUE	04/16/2021	D	Death	05/06/2021	5	Death	20	TRUE	SUS (Unified Health System)	1	Ward/Room	1
Epimed Monitor	General/Mixed	False	H1654	two	Public	Brazil	AGE2680	17	3be19dcd-a47f-4729-990f-6f62a713fcab	1661708	65	F				04/21/2021	09:30	False	False	False			D	Death	04/27/2021	8 o'clock		Uninformed	7	Death	No		3	6			TRUE	04/18/2021	D	Death	04/27/2021	5	Death	9	TRUE	SUS (Unified Health System)	1	Ward/Room	1
Epimed Monitor	General/Mixed	False	H1654	two	Public	Brazil	AGE2680	17	544ae349-040f-4734-a8c9-e9f96affbc17	1662382	78	F				04/24/2021	20:50	False	False	False			A	High	04/26/2021	18:00	6	Waiting for family	1	Ward or room	No		0	2			TRUE	04/24/2021	A	High	04/28/2021	1	Residence	4	TRUE		2	Emergency	1
Epimed Monitor	General/Mixed	False	H1654	two	Public	Brazil	AGE2680	17	830baa1d-1098-492c-bebc-0209d170a2fb	1662149	40	F				04/24/2021	22:40	False	False	False			A	High	05/11/2021	14:39	5	Waiting for family	1	Ward or room	No		2	17			TRUE	04/22/2021	A	High	05/21/2021	1	Residence	29	TRUE	SUS (Unified Health System)	1	Ward/Room	1
Epimed Monitor	General/Mixed	False	H1654	two	Public	Brazil	AGE2680	17	c7737c67-49a8-4b22-816b-d6da66bc1ec2	1662386	66	F				04/25/2021	01:45	False	False	False			A	High	04/27/2021	15:30	3	Uninformed	1	Ward or room	No		0	2			TRUE	04/25/2021	A	High	05/03/2021	1	Residence	8	TRUE	SUS (Unified Health System)	2	Emergency	1
Epimed Monitor	General/Mixed	False	H1654	two	Public	Brazil	AGE2680	17	c380a09f-fac5-4eaa-a47a-421666d8ffe3	1661509	70	M				04/26/2021	10:00 am	False	False	False			D	Death	05/16/2021	4:00 pm		Uninformed	7	Death	No		11	20			TRUE	04/15/2021	D	Death	05/16/2021	5	Death	31	TRUE		1	Ward/Room	1
Epimed Monitor	General/Mixed	False	H1654	two	Public	Brazil	AGE2680	17	b569829b-ff63-4d11-9468-f7ce5bec81a2	1662575	68	U				04/26/2021	14:00	False	False	False			A	High	05/02/2021	11:07	1	Uninformed	1	Ward or room	No		0	6			TRUE	04/26/2021	A	High	05/15/2021	1	Residence	19	TRUE	SUS (Unified Health System)	1	Ward/Room	1
Epimed Monitor	General/Mixed	False	H1654	two	Public	Brazil	AGE2680	17	e3ae31c1-2dea-42bb-93f1-cc9e92d1f42c	1662596	74	M				04/26/2021	16:30	False	False	False			D	Death	04/29/2021	07:20		Uninformed	7	Death	No		0	3			TRUE	04/26/2021	D	Death	04/29/2021	5	Death	3	TRUE	SUS (Unified Health System)	2	Emergency	1
Epimed Monitor	General/Mixed	False	H1654	two	Public	Brazil	AGE2680	17	fa5db3d9-69b3-46f3-8072-19b868137112	1656339	65	F				04/26/2021	21:00	False	False	False			D	Death	04/29/2021	05:20		Uninformed	7	Death	Yes, limit	2021-04-26	57	3	0		TRUE	02/28/2021	D	Death	04/29/2021	5	Death	60	TRUE	SUS (Unified Health System)	1	Ward/Room	1
Epimed Monitor	General/Mixed	False	H1654	two	Public	Brazil	AGE2680	17	3ce829df-f1fd-46e7-8a8a-cfa87726128b	1662653	77	F				04/27/2021	11:50	False	False	False			D	Death	05/01/2021	15:30		Uninformed	7	Death	No		0	4			TRUE	04/27/2021	D	Death	05/01/2021	5	Death	4	TRUE		6	Transfer from another hospital/institution	1
Epimed Monitor	General/Mixed	False	H1654	two	Public	Brazil	AGE2680	17	8868865c-7f13-496f-8dc1-6bb859515976	1662769	74	F				04/27/2021	20:10	False	False	False			A	High	05/01/2021	14:00	3	Uninformed	4	Another hospital	No		0	4			TRUE	04/27/2021	A	High	05/01/2021	3	Another hospital	4	TRUE	SUS (Unified Health System)	6	Transfer from another hospital/institution	1
Epimed Monitor	General/Mixed	False	H1654	two	Public	Brazil	AGE2680	17	fd21e213-c65d-47b4-899e-88d7e9c15a7c	1662768	47	F				04/27/2021	20:30	False	False	False			A	High	05/01/2021	14:00	3	Uninformed	1	Ward or room	No		0	4			TRUE	04/27/2021	A	High	05/06/2021	1	Residence	9	TRUE	SUS (Unified Health System)	6	Transfer from another hospital/institution	1
Epimed Monitor	General/Mixed	False	H1654	two	Public	Brazil	AGE2680	17	767494e3-4f51-47a7-bffe-e7f35b2e65b8	1662854	61	F				04/28/2021	11:54	False	False	False			A	High	05/07/2021	17:00	7	No bed availability in the destination unit	1	Ward or room	No		0	9			TRUE	04/28/2021	A	High	05/14/2021	1	Residence	16	TRUE	SUS (Unified Health System)	6	Transfer from another hospital/institution	1
Epimed Monitor	General/Mixed	False	H1654	two	Public	Brazil	AGE2680	17	4a8ee80f-c545-4658-b641-a2dc4f84192d	1662416	44	M				04/28/2021	14:20	False	False	False			A	High	04/30/2021	18:30	0	Uninformed	3	Another hospital ICU/ICU	No		3	2			TRUE	04/25/2021	D	Death	05/08/2021	5	Death	13	TRUE	SUS (Unified Health System)	1	Ward/Room	1
Epimed Monitor	General/Mixed	False	H1654	two	Public	Brazil	AGE2680	17	f0813108-3a91-4f85-9ab2-b42d7824ce1d	1662757	42	F				04/29/2021	01:30	False	False	False			A	High	05/11/2021	14:35	4	Uninformed	1	Ward or room	No		2	12			TRUE	04/27/2021	A	High	05/28/2021	1	Residence	31	TRUE		1	Ward/Room	1
Epimed Monitor	General/Mixed	False	H1654	two	Public	Brazil	AGE2680	17	c564d36c-9e7d-41a7-9906-04e8b3c6be5e	1663070	60	F				04/30/2021	00:30	False	False	False			D	Death	05/08/2021	4:00 am		Uninformed	7	Death	No		0	8			TRUE	04/30/2021	D	Death	05/08/2021	5	Death	8	TRUE	SUS (Unified Health System)	6	Transfer from another hospital/institution	1
Epimed Monitor	General/Mixed	False	H1654	two	Public	Brazil	AGE2680	17	c4cd6086-cd8a-40db-a9d9-2b3cdc48deb6	1663072	59	F				04/30/2021	03:00	False	False	False			A	High	05/12/2021	14:17	4	Uninformed	1	Ward or room	No		0	12			TRUE	04/30/2021	A	High	05/18/2021	1	Residence	18	TRUE	SUS (Unified Health System)	6	Transfer from another hospital/institution	1
Epimed Monitor	General/Mixed	False	H1654	two	Public	Brazil	AGE2680	17	46a7d502-7f11-43ba-8f45-07b502bca5bb	1663061	45	F				04/30/2021	11:00	False	False	False			D	Death	05/08/2021	23:00		Uninformed	7	Death	No		0	8			TRUE	04/30/2021	D	Death	05/08/2021	5	Death	8	TRUE		6	Transfer from another hospital/institution	1
Epimed Monitor	General/Mixed	False	H1654	two	Public	Brazil	AGE2680	17	279da8bc-0793-46a3-8669-31b36a2e38b2	1662771	80	F				04/30/2021	15:08	False	False	False			D	Death	05/02/2021	19:10		Uninformed	7	Death	No		3	2			TRUE	04/27/2021	D	Death	05/02/2021	5	Death	5	TRUE	SUS (Unified Health System)	1	Ward/Room	1
Epimed Monitor	General/Mixed	False	H1654	two	Public	Brazil	AGE2680	17	61831efa-8904-4468-9d2f-65551eaa534c	1662605	65	F				05/02/2021	08:30	False	False	False			D	Death	05/16/2021	01:10		Uninformed	7	Death	No		6	14			TRUE	04/26/2021	D	Death	05/16/2021	5	Death	20	TRUE	SUS (Unified Health System)	1	Ward/Room	1
Epimed Monitor	General/Mixed	False	H1654	two	Public	Brazil	AGE2680	17	925bc2ec-ba98-4a0e-8452-7151e3eb06fe	1663209	56	F				05/02/2021	10:33	False	False	False			A	High	05/20/2021	21:00	7	No bed availability in the destination unit	1	Ward or room	No		1	18			TRUE	05/01/2021	A	High	05/20/2021	1	Residence	19	TRUE	SUS (Unified Health System)	1	Ward/Room	1
Epimed Monitor	General/Mixed	False	H1654	two	Public	Brazil	AGE2680	17	7f1b2f77-37bd-4a74-a885-0f1a06fab2bf	1663213	37	M				05/02/2021	16:15	False	False	False			D	Death	05/25/2021	05:00		Uninformed	7	Death	No		1	23			TRUE	05/01/2021	D	Death	05/25/2021	5	Death	24	TRUE	SUS (Unified Health System)	1	Ward/Room	1
Epimed Monitor	General/Mixed	False	H1654	two	Public	Brazil	AGE2680	17	68890afc-a77d-4f13-8176-811e54e390d3	1661867	68	M				05/03/2021	10:00 am	False	False	False			D	Death	05/16/2021	4:00 pm		Uninformed	7	Death	No		14	13			TRUE	04/19/2021	D	Death	05/16/2021	5	Death	27	TRUE		1	Ward/Room	1
Epimed Monitor	General/Mixed	False	H1654	two	Public	Brazil	AGE2680	17	ee37d761-b8a7-41c3-8de6-05df24d42d8c	1663198	27	M				05/03/2021	12:00 pm	False	False	False			A	High	05/18/2021	15:00	2	Uninformed	1	Ward or room	No		3	15			TRUE	04/30/2021	A	High	05/22/2021	1	Residence	22	TRUE		6	Transfer from another hospital/institution	1
Epimed Monitor	General/Mixed	False	H1654	two	Public	Brazil	AGE2680	17	e5c5400c-7827-4b5c-a3b5-545eb126eb3a	1662400	57	F				05/03/2021	15:00	False	False	False			D	Death	05/09/2021	12:00 pm		Uninformed	7	Death	No		8	6			TRUE	04/25/2021	D	Death	05/09/2021	5	Death	14	TRUE		1	Ward/Room	1
Epimed Monitor	General/Mixed	False	H1654	two	Public	Brazil	AGE2680	17	b8932250-52ec-4273-ae75-68169452bed0	1660360	55	M				05/04/2021	15:44	False	False	False			A	High	05/07/2021	22:05	12	No bed availability in the destination unit	1	Ward or room	No		28	3			TRUE	04/06/2021	A	High	05/20/2021	1	Residence	44	TRUE		4	Another ICU/ICU in your hospital	1
Epimed Monitor	General/Mixed	False	H1654	two	Public	Brazil	AGE2680	17	37051290-ca9a-4ca0-8e2a-dba8bca90fec	1663590	56	M				05/04/2021	4:00 pm	False	False	False			D	Death	05/17/2021	10:00 am		Uninformed	7	Death	No		0	13			TRUE	05/04/2021	D	Death	05/17/2021	5	Death	13	TRUE		1	Ward/Room	1
Epimed Monitor	General/Mixed	False	H1654	two	Public	Brazil	AGE2680	17	c9068f06-f3c4-4c1c-ae45-fc170ae839d5	1663544	67	M				05/06/2021	11:29	False	False	False			A	High	05/17/2021	11:42	3	Uninformed	1	Ward or room	No		2	11			TRUE	05/04/2021	A	High	05/22/2021	1	Residence	18	TRUE	SUS (Unified Health System)	1	Ward/Room	1
Epimed Monitor	General/Mixed	False	H1654	two	Public	Brazil	AGE2680	17	1b2bec37-3e95-4e57-bdc9-e83d8d484c73	1663665	54	M				05/07/2021	10:59	False	False	False			D	Death	05/08/2021	19:00		Uninformed	7	Death	No		2	1			TRUE	05/05/2021	D	Death	05/08/2021	5	Death	3	TRUE		1	Ward/Room	1
Epimed Monitor	General/Mixed	False	H1654	two	Public	Brazil	AGE2680	17	c3e774fb-cf8c-4af6-bc8f-415e3b4bdd8e	1663729	60	F				05/07/2021	12:45	False	False	False			A	High	05/10/2021	13:51	5	Uninformed	1	Ward or room	No		2	3			TRUE	05/05/2021	A	High	05/18/2021	1	Residence	13	TRUE		1	Ward/Room	1
Epimed Monitor	General/Mixed	False	H1654	two	Public	Brazil	AGE2680	17	d9e421ec-68b9-498a-910b-8cf075e7567a	1663689	50	M				05/08/2021	4:00 pm	False	False	False			D	Death	05/08/2021	18:00		Uninformed	7	Death	No		3	1			TRUE	05/05/2021	D	Death	05/08/2021	5	Death	3	TRUE	SUS (Unified Health System)	1	Ward/Room	1
Epimed Monitor	General/Mixed	False	H1654	two	Public	Brazil	AGE2680	17	d0ab68df-64d9-4721-809e-3450fa834ed2	1664096	49	F				05/09/2021	17:30	False	False	False			D	Death	05/28/2021	14:40		Uninformed	7	Death	No		0	19			TRUE	05/09/2021	D	Death	05/28/2021	5	Death	19	TRUE	SUS (Unified Health System)	6	Transfer from another hospital/institution	1
Epimed Monitor	General/Mixed	False	H1654	two	Public	Brazil	AGE2680	17	100fd0a1-d647-440f-8507-4c45aec82021	1664111	30	F				05/09/2021	23:32	False	False	False			D	Death	06/03/2021	19:06		Uninformed	7	Death	No		0	25			TRUE	05/09/2021	D	Death	06/03/2021	5	Death	25	TRUE	SUS (Unified Health System)	6	Transfer from another hospital/institution	1
Epimed Monitor	General/Mixed	False	H1654	two	Public	Brazil	AGE2680	17	135ed78b-4347-46cf-9f1a-43ca0e054821	1664129	63	M				05/10/2021	12:39	False	False	False			D	Death	05/27/2021	23:30		Uninformed	7	Death	No		0	17			TRUE	05/10/2021	D	Death	05/27/2021	5	Death	17	TRUE	SUS (Unified Health System)	6	Transfer from another hospital/institution	1
Epimed Monitor	General/Mixed	False	H1654	two	Public	Brazil	AGE2680	17	17a604b4-9e6d-4a15-888d-0dc3bca38974	1662618	28	M				05/11/2021	11:00	False	False	False			D	Death	05/29/2021	03:20		Uninformed	7	Death	No		0	18			TRUE	05/11/2021	D	Death	05/29/2021	5	Death	18	TRUE		1	Ward/Room	1
Epimed Monitor	General/Mixed	False	H1654	two	Public	Brazil	AGE2680	17	ff46dd9d-8659-429a-b08b-a545433dc498	1664066	52	M				05/12/2021	00:00	False	False	False			D	Death	05/17/2021	twenty past six		Uninformed	7	Death	No		4	5			TRUE	05/08/2021	D	Death	05/17/2021	5	Death	9	TRUE	SUS (Unified Health System)	1	Ward/Room	1
Epimed Monitor	General/Mixed	False	H1654	two	Public	Brazil	AGE2680	17	90a1223d-8329-48ba-95f3-188cbd7a8540	1664177	59	F				05/12/2021	11:23	False	False	False			A	High	05/19/2021	15:00			3	Another hospital ICU/ICU	No		2	7			TRUE	05/10/2021							False	SUS (Unified Health System)	1	Ward/Room	1
Epimed Monitor	General/Mixed	False	H1654	two	Public	Brazil	AGE2680	17	b65dcc8d-e4bf-4ed2-a540-04349e4e1b36	1664108	79	M				05/12/2021	14:39	False	False	False			D	Death	05/24/2021	22:30		Uninformed	7	Death	No		3	12			TRUE	05/09/2021	D	Death	05/24/2021	5	Death	15	TRUE	SUS (Unified Health System)	1	Ward/Room	1
Epimed Monitor	General/Mixed	False	H1654	two	Public	Brazil	AGE2680	17	9634e124-c93d-43fe-a9ff-98555d917913	1664418	48	F				05/12/2021	21:20	False	False	False			A	High	05/21/2021	21:00	5	No bed availability in the destination unit	1	Ward or room	No		0	9			TRUE	05/12/2021	A	High	05/30/2021	1	Residence	18	TRUE	SUS (Unified Health System)	1	Ward/Room	1
Epimed Monitor	General/Mixed	False	H1654	two	Public	Brazil	AGE2680	17	c41577f4-1896-460f-a19c-1ee04eb6ee96	1664672	61	F				05/16/2021	10:18	False	False	False			D	Death	05/21/2021	12:45		Uninformed	7	Death	No		3	5			TRUE	05/13/2021	D	Death	05/21/2021	5	Death	8	TRUE	SUS (Unified Health System)	1	Ward/Room	1
Epimed Monitor	General/Mixed	False	H1654	two	Public	Brazil	AGE2680	17	7b7d8400-24d8-4b55-896f-5eb8ccea07d2	1664496	88	F				05/16/2021	16:05	False	False	False			D	Death	05/18/2021	11:30		Uninformed	7	Death	No		2	2			TRUE	05/14/2021	D	Death	05/18/2021	5	Death	4	TRUE	SUS (Unified Health System)	1	Ward/Room	1
Epimed Monitor	General/Mixed	False	H1654	two	Public	Brazil	AGE2680	17	fb13b6b3-1823-4832-82de-f865a1943235	1664164	67	M				05/17/2021	16:30	False	False	False			D	Death	05/20/2021	21:10		Uninformed	7	Death	No		7	3			TRUE	05/10/2021	D	Death	05/20/2021	5	Death	10	TRUE		1	Ward/Room	1
Epimed Monitor	General/Mixed	False	H1654	two	Public	Brazil	AGE2680	17	7bc83b2b-fb54-46a8-816d-daac19c71c96	1665260	58	F				05/18/2021	17:00	False	False	False			A	High	05/29/2021	13:00	3	Uninformed	1	Ward or room	No		0	11			TRUE	05/18/2021	A	High	05/31/2021	1	Residence	13	TRUE		6	Transfer from another hospital/institution	1
Epimed Monitor	General/Mixed	False	H1654	two	Public	Brazil	AGE2680	17	eb6763af-a69d-4d20-b67f-251c7d5b4578	1665283	57	M				05/18/2021	18:45	False	False	False			D	Death	06/01/2021	05:50		Uninformed	7	Death	No		0	14			TRUE	05/18/2021	D	Death	06/01/2021	5	Death	14	TRUE		6	Transfer from another hospital/institution	1
Epimed Monitor	General/Mixed	False	H1654	two	Public	Brazil	AGE2680	17	d91a2fcd-c4f3-4222-b8e6-70f4a7cf38e4	1664914	61	F				05/18/2021	18:45	False	False	False			D	Death	06/02/2021	22:07		Uninformed	7	Death	No		1	15			TRUE	05/17/2021	D	Death	06/02/2021	5	Death	16	TRUE		6	Transfer from another hospital/institution	1
Epimed Monitor	General/Mixed	False	H1654	two	Public	Brazil	AGE2680	17	471163d2-5ad6-4905-aeba-cb7bf76a7a49	1665141	57	F				05/18/2021	8:00 pm	False	False	False			A	High	06/16/2021	8:00 pm	9	No bed availability in the destination unit	1	Ward or room	No		0	29			TRUE	05/18/2021							False		6	Transfer from another hospital/institution	1
Epimed Monitor	General/Mixed	False	H1654	two	Public	Brazil	AGE2680	17	868135fe-b63f-464d-87d0-370e0ad7c832	1665294	63	F				05/19/2021	22:00	False	False	False			D	Death	05/21/2021	15:00		Uninformed	7	Death	No		0	2			TRUE	05/19/2021	D	Death	05/21/2021	5	Death	2	TRUE		6	Transfer from another hospital/institution	1
Epimed Monitor	General/Mixed	False	H1654	two	Public	Brazil	AGE2680	17	e5bf4dfe-155d-4081-b9fe-9914b170550d	1665643	64	M				05/21/2021	00:30	False	False	False			D	Death	06/15/2021	17:40		Uninformed	7	Death	No		0	25			TRUE	05/21/2021	D	Death	06/15/2021	5	Death	25	TRUE		6	Transfer from another hospital/institution	1
Epimed Monitor	General/Mixed	False	H1654	two	Public	Brazil	AGE2680	17	ea7fa969-4a11-4fb0-8bce-9417cd0187c0	1665711	31	M	140	179	43.7	05/21/2021	13:00	False	False	False			D	Death	05/26/2021	22:00		Uninformed	7	Death	No		0	5			TRUE	05/21/2021	D	Death	05/26/2021	5	Death	5	TRUE		1	Ward/Room	1
Epimed Monitor	General/Mixed	False	H1654	two	Public	Brazil	AGE2680	17	5a72419b-9a81-4b17-9a59-a2e90701b3a6	1665726	66	F				05/22/2021	13:40	False	False	False			A	High	06/02/2021	13:30	3	Uninformed	1	Ward or room	No		1	11			TRUE	05/21/2021							False	SUS (Unified Health System)	1	Ward/Room	1
Epimed Monitor	General/Mixed	False	H1654	two	Public	Brazil	AGE2680	17	1ed709ef-39ff-4920-818d-a800dd3877c9	1665871	47	M				05/22/2021	8:00 pm	False	False	False			D	Death	05/30/2021	02:15		Uninformed	7	Death	No		0	8			TRUE	05/22/2021	D	Death	05/30/2021	5	Death	8	TRUE		6	Transfer from another hospital/institution	1
Epimed Monitor	General/Mixed	False	H1654	two	Public	Brazil	AGE2680	17	7d4d5689-1ba0-4467-a6b0-f7b7bba7dc38	1665644	64	F				05/22/2021	22:00	False	False	False			A	High	06/16/2021	16:30	5	No bed availability in the destination unit	1	Ward or room	No		0	25			TRUE	05/22/2021							False		1	Ward/Room	1
Epimed Monitor	General/Mixed	False	H1654	two	Public	Brazil	AGE2680	17	b3eb5a26-643b-478b-802c-6636bfa40a2a	1666104	44	F				05/24/2021	18:00	False	False	False			A	High	06/06/2021	14:00	5	No bed availability in the destination unit	1	Ward or room	No		0	13			TRUE	05/24/2021							False		6	Transfer from another hospital/institution	1
Epimed Monitor	General/Mixed	False	H1654	two	Public	Brazil	AGE2680	17	848c2908-923a-4765-bffc-825734f6d67d	1665802	54	F				05/25/2021	10:30	False	False	False			D	Death	06/08/2021	07:10		Uninformed	7	Death	No		3	14			TRUE	05/22/2021	D	Death	06/08/2021	5	Death	17	TRUE		1	Ward/Room	1
Epimed Monitor	General/Mixed	False	H1654	two	Public	Brazil	AGE2680	17	f0044196-e83a-4030-b192-44a92851739b	1662393	62	M				05/25/2021	13:00	False	False	False			D	Death	06/06/2021	15:30		Uninformed	7	Death	No		30	12			TRUE	04/25/2021	D	Death	06/06/2021	5	Death	42	TRUE	SUS (Unified Health System)	4	Another ICU/ICU in your hospital	1
Epimed Monitor	General/Mixed	False	H1654	two	Public	Brazil	AGE2680	17	a38bdd07-0f3b-497d-9c7a-5825d965f06b	1665435	51	M				05/27/2021	01:05	False	False	False			D	Death	06/01/2021	23:00		Uninformed	7	Death	No		7	5			TRUE	05/20/2021	D	Death	06/01/2021	5	Death	12	TRUE		1	Ward/Room	1
Epimed Monitor	General/Mixed	False	H1654	two	Public	Brazil	AGE2680	17	5c6da93a-d089-480e-b130-34f58e7df5c1	1666667	32	M				05/28/2021	11:00	False	False	False			D	Death	06/08/2021	00:05		Uninformed	7	Death	No		1	11			TRUE	05/27/2021	D	Death	06/08/2021	5	Death	12	TRUE		1	Ward/Room	1
Epimed Monitor	General/Mixed	False	H1654	two	Public	Brazil	AGE2680	17	2b725dca-936a-48b3-992a-fbb44019210a	1665613	66	F				05/28/2021	23:40	False	False	False			D	Death	06/06/2021	13:30		Uninformed	7	Death	No		8	9			TRUE	05/20/2021	D	Death	06/06/2021	5	Death	17	TRUE		1	Ward/Room	1
Epimed Monitor	General/Mixed	False	H1654	two	Public	Brazil	AGE2680	17	b3557484-ad84-42a4-8281-6f5b7330450f	1666562	68	M				05/29/2021	12:00 pm	False	False	False			D	Death	05/31/2021	13:21		Uninformed	7	Death	No		2	2			TRUE	05/27/2021	D	Death	05/31/2021	5	Death	4	TRUE		1	Ward/Room	1
Epimed Monitor	General/Mixed	False	H1654	two	Public	Brazil	AGE2680	17	fd6318b4-9c30-43e1-ac89-67b3d678203d	1666271	31	M				05/30/2021	07:30	False	False	False			A	High	06/01/2021	8:00 pm	30	No bed availability in the destination unit	4	Another hospital	No		5	2			TRUE	05/25/2021	A	High	06/01/2021	3	Another hospital	7	TRUE		1	Ward/Room	1
Epimed Monitor	General/Mixed	False	H1654	two	Public	Brazil	AGE2680	17	dae59042-8490-4280-97f7-05c0801cf830	1666826	50	M				05/30/2021	11:00	False	False	False			A	High	06/04/2021	14:00	4	Uninformed	1	Ward or room	No		1	5			TRUE	05/29/2021							False	SUS (Unified Health System)	1	Ward/Room	1
Epimed Monitor	General/Mixed	False	H1654	two	Public	Brazil	AGE2680	17	0517fc1f-6aa2-4a30-b297-10c6bae5a9e9	1666958	59	M				05/31/2021	17:30	False	False	False			A	High	06/17/2021	21:00	5	Uninformed			No		0	17			False	05/31/2021							False		1	Ward/Room	1
Epimed Monitor	General/Mixed	False	H1654	two	Public	Brazil	AGE2680	17	55fe1bd3-f461-4ac6-8166-adf9e9bf65ac	1666894	25	F				06/01/2021	10:00 am	False	False	False			A	High	06/06/2021	14:49	4	No bed availability in the destination unit	1	Ward or room	No		1	5			TRUE	05/31/2021							False		1	Ward/Room	1
Epimed Monitor	General/Mixed	False	H1654	two	Public	Brazil	AGE2680	17	5b799cb4-81bb-4def-a6d8-4cefd4776144	1666272	39	M				06/02/2021	08:30	False	False	False			A	High	06/13/2021	14:00	4	Uninformed	1	Ward or room	No		8	11			TRUE	05/25/2021							False		1	Ward/Room	1
Epimed Monitor	General/Mixed	False	H1654	two	Public	Brazil	AGE2680	17	12e919c7-afd2-4eda-a79f-ad59726ff055	1666950	58	F				06/02/2021	08:30	False	False	False			A	High	06/13/2021	14:00	4	Uninformed	1	Ward or room	No		2	11			TRUE	05/31/2021							False		1	Ward/Room	1
Epimed Monitor	General/Mixed	False	H1654	two	Public	Brazil	AGE2680	17	468e64d2-40de-492d-9038-cd5cea5389d0	1667230	56	M				06/02/2021	17:00	False	False	False			D	Death	06/12/2021	19:10		Uninformed	7	Death	No		0	10			TRUE	06/02/2021	D	Death	06/12/2021	5	Death	10	TRUE		1	Ward/Room	1
Epimed Monitor	General/Mixed	False	H1654	two	Public	Brazil	AGE2680	17	bd6f9956-4f74-42bd-b22a-08be251d7fa9	1667423	53	M				06/03/2021	02:00	False	False	False			D	Death	06/17/2021	03:41		Uninformed	7	Death	No		1	14			TRUE	06/02/2021	D	Death	06/17/2021	5	Death	15	TRUE		1	Ward/Room	1
Epimed Monitor	General/Mixed	False	H1654	two	Public	Brazil	AGE2680	17	d3ab10b5-f792-44ff-9e49-74ddd6a4b4b3	1667080	77	M				06/03/2021	23:50	False	False	False			D	Death	06/07/2021	15:30		Uninformed	7	Death	No		3	4			TRUE	05/31/2021	D	Death	06/07/2021	5	Death	7	TRUE		1	Ward/Room	1
Epimed Monitor	General/Mixed	False	H1654	two	Public	Brazil	AGE2680	17	c31c130e-0083-4d3e-9182-d1a1fdb34f46	1667589	41	F				06/04/2021	20:30	False	False	False			D	Death	06/20/2021	05:40		Uninformed	7	Death	No		0	16			TRUE	06/04/2021	D	Death	06/20/2021	5	Death	16	TRUE		1	Ward/Room	1
Epimed Monitor	General/Mixed	False	H1654	two	Public	Brazil	AGE2680	17	608e9a0a-2d11-48ef-a36f-f92fa78050a0	1667735	72	F				06/06/2021	18:30	False	False	False			D	Death	06/07/2021	16:40		Uninformed	7	Death	No		0	1			TRUE	06/06/2021	D	Death	06/07/2021	5	Death	1	TRUE		1	Ward/Room	1
Epimed Monitor	General/Mixed	False	H1654	two	Public	Brazil	AGE2680	17	b17b2d93-a917-4503-ab98-b20bbfe5c18f	1666464	57	M				06/06/2021	20:30	False	False	False			D	Death	06/12/2021	00:32		Uninformed	7	Death	No		9	6			TRUE	05/28/2021	D	Death	06/12/2021	5	Death	15	TRUE		1	Ward/Room	1
Epimed Monitor	General/Mixed	False	H1654	two	Public	Brazil	AGE2680	17	ecb8a808-0285-46ba-af3c-2ea1ddf065ed	1667738	35	F				06/06/2021	23:00	False	False	False			D	Death	06/24/2021	4:00 pm		Uninformed	7	Death	No		0	18			TRUE	06/06/2021	D	Death	06/24/2021	5	Death	18	TRUE		1	Ward/Room	1
Epimed Monitor	General/Mixed	False	H1654	two	Public	Brazil	AGE2680	17	3fb34814-544b-43db-a639-40848efc5df6	1667681	46	M				06/07/2021	06:00	False	False	False			A	High	06/22/2021	09:30	2	Uninformed	1	Ward or room	No		0	15			TRUE	06/07/2021							False		1	Ward/Room	1
Epimed Monitor	General/Mixed	False	H1654	two	Public	Brazil	AGE2680	17	17de84bb-76ad-46f1-9e6b-a4726493b108	1666483	58	M				06/07/2021	21:00	False	False	False			D	Death	06/10/2021	10:15		Uninformed	7	Death	No		0	3			TRUE	06/07/2021	D	Death	06/10/2021	5	Death	3	TRUE		1	Ward/Room	1
Epimed Monitor	General/Mixed	False	H1654	two	Public	Brazil	AGE2680	17	eced385f-0de7-40ff-b351-ca57992bc3c7	1667847	48	M				06/07/2021	21:00	False	False	False			D	Death	07/04/2021	23:30		Uninformed	7	Death	No		0	27			TRUE	06/07/2021	D	Death	07/04/2021	5	Death	27	TRUE		1	Ward/Room	1
Epimed Monitor	General/Mixed	False	H1654	two	Public	Brazil	AGE2680	17	3bb2c314-f41e-4907-a1a8-de17a0b2edd6	1667954	50	M				06/08/2021	12:00 pm	False	False	False			D	Death	06/18/2021	4:00 am		Uninformed	7	Death	No		0	10			TRUE	06/08/2021	D	Death	06/18/2021	5	Death	10	TRUE		6	Transfer from another hospital/institution	1
Epimed Monitor	General/Mixed	False	H1654	two	Public	Brazil	AGE2680	17	4d6b21c9-107f-42ec-bf4e-c0a44ae7c584	1667487	73	F				06/09/2021	09:00	False	False	False			D	Death	06/09/2021	19:30		Uninformed	7	Death	No		5	1			TRUE	06/04/2021	D	Death	06/09/2021	5	Death	5	TRUE		1	Ward/Room	1
Epimed Monitor	General/Mixed	False	H1654	two	Public	Brazil	AGE2680	17	c0671220-aeb4-4a3f-a3d6-1d6b72203e5e	1668069	55	M				06/10/2021	23:00	False	False	False			D	Death	06/27/2021	20:20		Uninformed	7	Death	No		0	17			TRUE	06/10/2021	D	Death	06/27/2021	5	Death	17	TRUE		1	Ward/Room	1
Epimed Monitor	General/Mixed	False	H1654	two	Public	Brazil	AGE2680	17	9bf1c794-4581-40ed-8643-ed9ae592803d	1668323	52	M				06/11/2021	23:00	False	False	False			A	High	06/15/2021	16:30	5	No bed availability in the destination unit	1	Ward or room	No		1	4			TRUE	06/10/2021							False		1	Ward/Room	1
Epimed Monitor	General/Mixed	False	H1654	two	Public	Brazil	AGE2680	17	0b0374c9-0ca6-476c-8230-0f81a66da8a2	1668114	46	M				06/12/2021	03:00	False	False	False			D	Death	06/20/2021	20:35		Uninformed	7	Death	No		3	8			TRUE	06/09/2021	D	Death	06/20/2021	5	Death	11	TRUE		1	Ward/Room	1
Epimed Monitor	General/Mixed	False	H1654	two	Public	Brazil	AGE2680	17	a941c3a1-ef21-4a5b-ac17-98d7ce6ff3e9	1668721	50	M				06/13/2021	22:00	False	False	False			D	Death	07/06/2021	23:20		Uninformed	7	Death	No		0	23			TRUE	06/13/2021	D	Death	07/06/2021	5	Death	23	TRUE		6	Transfer from another hospital/institution	1
Epimed Monitor	General/Mixed	False	H1654	two	Public	Brazil	AGE2680	17	ba485137-2ab1-4e0f-9df4-087a3e50d68c	1668864	51	M				06/14/2021	4:00 pm	False	False	False			D	Death	06/21/2021	13:45		Uninformed	7	Death	No		0	7			TRUE	06/14/2021	D	Death	06/21/2021	5	Death	7	TRUE		6	Transfer from another hospital/institution	1
Epimed Monitor	General/Mixed	False	H1654	two	Public	Brazil	AGE2680	17	ff1fc4ac-0238-4b82-8ef5-5700c2a815b4	1668865	69	F				06/14/2021	16:30	False	False	False			D	Death	06/19/2021	08:30		Uninformed	7	Death	No		0	5			TRUE	06/14/2021	D	Death	06/19/2021	5	Death	5	TRUE		6	Transfer from another hospital/institution	1
Epimed Monitor	General/Mixed	False	H1654	two	Public	Brazil	AGE2680	17	46652674-4a5a-4f4e-b47b-7566740223bf	1668712	55	F				06/15/2021	18:00	False	False	False			A	High	07/24/2021	10:30	2	Uninformed	1	Ward or room	No		1	39			TRUE	06/14/2021							False		1	Ward/Room	1
Epimed Monitor	General/Mixed	False	H1654	two	Public	Brazil	AGE2680	17	87a02915-2051-45fd-91a7-4a1a843090d3	1665330	42	M				06/16/2021	11:00	False	False	False			D	Death	06/21/2021	02:10		Uninformed	7	Death	No		11	5			TRUE	06/05/2021	D	Death	06/21/2021	5	Death	16	TRUE		1	Ward/Room	1
Epimed Monitor	General/Mixed	False	H1654	two	Public	Brazil	AGE2680	17	85375405-ad90-4d81-991c-7b74a9ad4475	1669222	22	F				06/16/2021	22:00	False	False	False			A	High	07/02/2021	4:00 pm	2	Uninformed	1	Ward or room	No		0	16			TRUE	06/16/2021	D	Death	07/18/2021	5	Death	32	TRUE		6	Transfer from another hospital/institution	1
Epimed Monitor	General/Mixed	False	H1654	two	Public	Brazil	AGE2680	17	97d08d9d-2dd7-4118-993c-c576014f583b	1669212	59	F				06/17/2021	12:00 pm	False	False	False			A	High	06/24/2021	18:00	2	Uninformed	1	Ward or room	No		0	7			TRUE	06/17/2021							False		6	Transfer from another hospital/institution	1
Epimed Monitor	General/Mixed	False	H1654	two	Public	Brazil	AGE2680	17	cbc46aca-4af4-4507-a464-efb5dc8e6b54	1668467	66	F				06/17/2021	21:00	False	False	False			D	Death	06/17/2021	21:40		Uninformed	7	Death	No		7	1			TRUE	06/10/2021	D	Death	06/17/2021	5	Death	7	TRUE		1	Ward/Room	1
Epimed Monitor	General/Mixed	False	H1654	two	Public	Brazil	AGE2680	17	ec5e5eb4-7a93-4454-9dc2-2fb38311804e	1669215	58	M				06/18/2021	00:01	False	False	False			D	Death	06/28/2021	10:40		Uninformed	7	Death	No		1	10			TRUE	06/17/2021	D	Death	06/28/2021	5	Death	11	TRUE		1	Ward/Room	1
Epimed Monitor	General/Mixed	False	H1654	two	Public	Brazil	AGE2680	17	3a9de50b-2fa4-4a7c-954f-abe7df6188ee	1669370	58	F				06/18/2021	09:00	False	False	False			D	Death	06/29/2021	16:29		Uninformed	7	Death	No		0	11			TRUE	06/18/2021	D	Death	06/29/2021	5	Death	11	TRUE		1	Ward/Room	1
Epimed Monitor	General/Mixed	False	H1654	two	Public	Brazil	AGE2680	17	5d5f6650-73f3-4215-b6c1-d6b648fb48c6	1668730	74	M				06/19/2021	13:22	False	False	False			D	Death	06/23/2021	06:05		Uninformed	7	Death	No		1	4			TRUE	06/18/2021	D	Death	06/23/2021	5	Death	5	TRUE		1	Ward/Room	1
Epimed Monitor	General/Mixed	False	H1654	two	Public	Brazil	AGE2680	17	0598294a-8a95-4f02-a531-9f12d18a27d8	1669260	47	F				06/19/2021	21:00	False	False	False			D	Death	07/22/2021	00:06		Uninformed	7	Death	No		0	33			TRUE	06/19/2021	D	Death	07/22/2021	5	Death	33	TRUE		6	Transfer from another hospital/institution	1
Epimed Monitor	General/Mixed	False	H1654	two	Public	Brazil	AGE2680	17	6d29bbcb-998d-4754-9bd3-efc1e72cde0f	1669312	46	F				06/20/2021	23:00	False	False	False			D	Death	07/06/2021	19:04		Uninformed	7	Death	No		0	16			TRUE	06/20/2021	D	Death	07/06/2021	5	Death	16	TRUE		6	Transfer from another hospital/institution	1
Epimed Monitor	General/Mixed	False	H1654	two	Public	Brazil	AGE2680	17	bec34c3c-87f9-42e4-ac18-29f56a4b77ca	1669556	41	F				06/21/2021	12:00 pm	False	False	False			A	High	07/01/2021	21:30	6	Uninformed			No		0	10			TRUE	06/21/2021							False		1	Ward/Room	1
Epimed Monitor	General/Mixed	False	H1654	two	Public	Brazil	AGE2680	17	fbc33628-e288-499f-975f-86758761cee5	1669581	45	F				06/21/2021	20:50	False	False	False			A	High	07/15/2021	8:00 pm	5	Waiting for exam results or completion	1	Ward or room	No		0	24			TRUE	06/21/2021							False		1	Ward/Room	1
Epimed Monitor	General/Mixed	False	H1654	two	Public	Brazil	AGE2680	17	800ece4b-3597-4fac-93e2-e85ffc3dd660	1669259	74	M				06/22/2021	15:15	False	False	False			A	High	07/02/2021	4:00 pm	5	No bed availability in the destination unit	1	Ward or room	No		0	10			TRUE	06/22/2021							False		6	Transfer from another hospital/institution	1
Epimed Monitor	General/Mixed	False	H1654	two	Public	Brazil	AGE2680	17	23328f28-8604-4ea5-8eaa-9b65a6caf4b5	1669889	72	M				06/22/2021	4:00 pm	False	False	False			D	Death	07/16/2021	19:50		Uninformed	7	Death	No		0	24			TRUE	06/22/2021	D	Death	07/16/2021	5	Death	24	TRUE		6	Transfer from another hospital/institution	1
Epimed Monitor	General/Mixed	False	H1654	two	Public	Brazil	AGE2680	17	1276e294-1fe4-44ab-ae99-7679012c07c0	1669516	39	F				06/23/2021	21:00	False	False	False			A	High	07/05/2021	16:30	2	Uninformed	1	Ward or room	No		4	12			TRUE	06/19/2021							False		1	Ward/Room	1
Epimed Monitor	General/Mixed	False	H1654	two	Public	Brazil	AGE2680	17	30d038df-116d-469e-b18e-9bdb768c9742	1669256	40	M				06/24/2021	21:00	False	False	False			A	High	06/26/2021	18:00	4	Uninformed	1	Ward or room	No		5	2			TRUE	06/19/2021							False		1	Ward/Room	1
Epimed Monitor	General/Mixed	False	H1654	two	Public	Brazil	AGE2680	17	0befaa7c-18db-43e1-9f8a-1183f716bfdb	1670149	52	M				06/25/2021	10:00 am	False	False	False			D	Death	07/20/2021	23:25		Uninformed	7	Death	No		0	25			TRUE	06/25/2021	D	Death	07/20/2021	5	Death	25	TRUE		1	Ward/Room	1
Epimed Monitor	General/Mixed	False	H1654	two	Public	Brazil	AGE2680	17	4c26e67b-92c4-4f48-ab5c-ebbf18145ac5	1670326	49	M				06/26/2021	22:10	False	False	False			A	High	07/12/2021	18:00	8	Waiting for exam results or completion	1	Ward or room	No		1	16			TRUE	06/25/2021							False		1	Ward/Room	1
Epimed Monitor	General/Mixed	False	H1654	two	Public	Brazil	AGE2680	17	e9842672-6bb3-4570-b8cb-44349d77cb2e	1670663	58	M				06/28/2021	20:30	False	False	False			D	Death	07/12/2021	04:30		Uninformed	7	Death	No		0	14			TRUE	06/28/2021	D	Death	07/12/2021	5	Death	14	TRUE		6	Transfer from another hospital/institution	1
Epimed Monitor	General/Mixed	False	H1654	two	Public	Brazil	AGE2680	17	d3eff39b-d3c9-4681-a138-d4a71ec11e0f	1670479	73	M				06/28/2021	22:00	False	False	False			D	Death	07/05/2021	15:45		Uninformed	7	Death	No		0	7			TRUE	06/28/2021	D	Death	07/05/2021	5	Death	7	TRUE		6	Transfer from another hospital/institution	1
Epimed Monitor	General/Mixed	False	H1654	two	Public	Brazil	AGE2680	17	dce3b45f-7000-4e73-b1c5-6d46acd9bd36	1671184	22	F				07/02/2021	11:00	False	False	False			A	High	07/12/2021	12:30	4	Waiting for exam results or completion	1	Ward or room	No		0	10			TRUE	07/02/2021							False		6	Transfer from another hospital/institution	1
Epimed Monitor	General/Mixed	False	H1654	two	Public	Brazil	AGE2680	17	51baa9ad-2eeb-4999-9a5d-13fd69d00910	1671227	59	M				07/02/2021	18:30	False	False	False			D	Death	07/11/2021	20:30		Uninformed	7	Death	No		0	9			TRUE	07/02/2021	D	Death	07/11/2021	5	Death	9	TRUE		6	Transfer from another hospital/institution	1
Epimed Monitor	General/Mixed	False	H1654	two	Public	Brazil	AGE2680	17	62a488b0-4499-44d9-9e83-5847db54c8f9	1671233	46	M				07/02/2021	21:00	False	False	False			D	Death	07/12/2021	16:06		Uninformed	7	Death	No		0	10			TRUE	07/02/2021	D	Death	07/12/2021	5	Death	10	TRUE		6	Transfer from another hospital/institution	1
Epimed Monitor	General/Mixed	False	H1654	two	Public	Brazil	AGE2680	17	6837827e-1ffe-47ad-b78e-fb7c0edf1e21	1670945	48	F				07/03/2021	22:00	False	False	False			A	High	07/09/2021	18:00	7	Waiting for family	1	Ward or room	No		2	6			TRUE	07/01/2021							False		1	Ward/Room	1
Epimed Monitor	General/Mixed	False	H1654	two	Public	Brazil	AGE2680	17	00c1a369-1ba8-46fa-822c-12ae71acaf9f	1671522	60	M				07/05/2021	21:30	False	False	False			D	Death	07/14/2021	18:50		Uninformed	7	Death	No		0	9			TRUE	07/05/2021	D	Death	07/14/2021	5	Death	9	TRUE		6	Transfer from another hospital/institution	1
Epimed Monitor	General/Mixed	False	H1654	two	Public	Brazil	AGE2680	17	5da4b38a-626a-4c3a-abf9-0169e1be0a8b	1670724	61	M				07/05/2021	22:00	False	False	False			D	Death	07/12/2021	07:00		Uninformed	7	Death	No		6	7			TRUE	06/29/2021	D	Death	07/12/2021	5	Death	13	TRUE		1	Ward/Room	1
Epimed Monitor	General/Mixed	False	H1654	two	Public	Brazil	AGE2680	17	c0b1f298-84ec-4e88-85c0-84f51744cc95	1671512	52	M				07/06/2021	11:00	False	False	False			D	Death	07/06/2021	16:40		Uninformed	7	Death	No		1	1			TRUE	07/05/2021	D	Death	07/06/2021	5	Death	1	TRUE		1	Ward/Room	1
Epimed Monitor	General/Mixed	False	H1654	two	Public	Brazil	AGE2680	17	85375405-ad90-4d81-991c-7b74a9ad4475	1669222	22	F	140	163	52.7	07/06/2021	22:00	TRUE	False	False			D	Death	07/18/2021	01:30		Uninformed	7	Death	No		20	12			TRUE	06/16/2021	D	Death	07/18/2021	5	Death	32	TRUE		1	Ward/Room	1
Epimed Monitor	General/Mixed	False	H1654	two	Public	Brazil	AGE2680	17	77d2f582-1498-40f2-8506-c36e3faf0dbd	1671288	43	M				07/07/2021	11:30	False	False	False			D	Death	07/07/2021	16:48		Uninformed	7	Death	No		0	1			TRUE	07/07/2021	D	Death	07/07/2021	5	Death	1	TRUE		1	Ward/Room	1
Epimed Monitor	General/Mixed	False	H1654	two	Public	Brazil	AGE2680	17	de06aadc-2d02-4e5b-9012-508ea5ed9506	1671813	69	M				07/07/2021	23:15	False	False	False			D	Death	07/16/2021	01:30		Uninformed	7	Death	No		0	9			TRUE	07/07/2021	D	Death	07/16/2021	5	Death	9	TRUE		1	Ward/Room	1
Epimed Monitor	General/Mixed	False	H1654	two	Public	Brazil	AGE2680	17	7444acd8-28d5-401a-b4fe-290386ecbee0	1671645	55	F				07/08/2021	8 o'clock	False	False	False			D	Death	07/09/2021	03:40		Uninformed	7	Death	No		0	1			TRUE	07/08/2021	D	Death	07/09/2021	5	Death	1	TRUE		1	Ward/Room	1
Epimed Monitor	General/Mixed	False	H1654	two	Public	Brazil	AGE2680	17	8d723932-6da5-4732-a20c-04538d4b5386	1672151	28	M				07/11/2021	11:20	False	False	False			A	High	06/08/2021	10:00 am	18	Waiting for exam results or completion	1	Ward or room	No		0	26			TRUE	07/11/2021							False		1	Ward/Room	1
Epimed Monitor	General/Mixed	False	H1654	two	Public	Brazil	AGE2680	17	4b87b0dd-f2b0-4e6f-a6a2-e9d5a99edf0c	1671762	38	M				07/11/2021	23:00	False	False	False			A	High	02/08/2021	16:30	1	Uninformed	1	Ward or room	No		2	22			TRUE	07/09/2021							False		1	Ward/Room	1
Epimed Monitor	General/Mixed	False	H1654	two	Public	Brazil	AGE2680	17	c3f0eead-30b5-42b4-b31f-1c44bbce40d0	1671829	33	M				07/12/2021	15:00	False	False	False			A	High	07/15/2021	8:00 pm	5	Waiting for exam results or completion	1	Ward or room	No		0	3			TRUE	07/12/2021							False		6	Transfer from another hospital/institution	1
Epimed Monitor	General/Mixed	False	H1654	two	Public	Brazil	AGE2680	17	86c10e0c-e895-4037-ba62-fc5c332f04e9	1672481	36	M				07/14/2021	11:00	False	False	False			A	High	07/26/2021	4:00 pm	6	Waiting for exam results or completion			No		1	12			TRUE	07/13/2021							False		1	Ward/Room	1
Epimed Monitor	General/Mixed	False	H1654	two	Public	Brazil	AGE2680	17	dda94df6-8306-4367-a88e-0a8905218cd1	1672207	48	M				07/15/2021	8:00 pm	False	False	False			D	Death	07/26/2021	16:05		Uninformed	7	Death	No		2	11			TRUE	07/13/2021	D	Death	07/26/2021	5	Death	13	TRUE		1	Ward/Room	1
Epimed Monitor	General/Mixed	False	H1654	two	Public	Brazil	AGE2680	17	ac762d7e-3e43-4767-bd6e-57ed5afd87e3	1672125	62	M				07/16/2021	10:00 am	False	False	False			D	Death	07/29/2021	11:00		Uninformed	7	Death	No		6	13			TRUE	07/10/2021	D	Death	07/29/2021	5	Death	19	TRUE		1	Ward/Room	1
Epimed Monitor	General/Mixed	False	H1654	two	Public	Brazil	AGE2680	17	e427bd92-d8cc-4127-a10e-8fdecfca0394	1664873	37	M				07/16/2021	4:00 pm	False	False	False			A	High	06/08/2021	10:00 am	18	Waiting for exam results or completion	1	Ward or room	No		61	21			TRUE	05/16/2021							False		4	Another ICU/ICU in your hospital	1
Epimed Monitor	General/Mixed	False	H1654	two	Public	Brazil	AGE2680	17	5ad3393f-78bf-4c61-b791-269db452954b	1671770	69	M				07/16/2021	4:00 pm	False	False	False			D	Death	07/21/2021	03:30		Uninformed	7	Death	No		9	5			TRUE	07/07/2021	D	Death	07/21/2021	5	Death	14	TRUE		4	Another ICU/ICU in your hospital	1
Epimed Monitor	General/Mixed	False	H1654	two	Public	Brazil	AGE2680	17	9238d8d6-c592-4fb1-a9c5-5de998ee7fb9	1671103	45	M				07/19/2021	01:20	TRUE	False	TRUE			D	Death	07/30/2021	06:55		Uninformed	7	Death	No		17	11			TRUE	07/02/2021	D	Death	07/30/2021	5	Death	28	TRUE		1	Ward/Room	1
Epimed Monitor	General/Mixed	False	H1654	two	Public	Brazil	AGE2680	17	e5c8031e-83e7-415f-9f87-17af5f78987e	1673172	75	F				07/20/2021	12:00 pm	False	False	False			A	High	03/08/2021	14:00	3	Uninformed	1	Ward or room	No		0	14			TRUE	07/20/2021							False		1	Ward/Room	1
Epimed Monitor	General/Mixed	False	H1654	two	Public	Brazil	AGE2680	17	2e826f23-9eaa-4e80-b91d-f7f96b3920b7	1672861	59	F				07/22/2021	09:00	False	False	False			D	Death	07/23/2021	16:30		Uninformed	7	Death	No		5	1			TRUE	07/17/2021	D	Death	07/23/2021	5	Death	6	TRUE		1	Ward/Room	1
Epimed Monitor	General/Mixed	False	H1654	two	Public	Brazil	AGE2680	17	42aaa030-0859-4ee8-8d9b-12dda2f6f3ff	1673734	21	F				07/25/2021	02:20	False	False	False			A	High	07/31/2021	4:00 pm	5	Waiting for family	1	Ward or room	No		0	6			TRUE	07/25/2021							False		1	Ward/Room	1
Epimed Monitor	General/Mixed	False	H1654	two	Public	Brazil	AGE2680	17	f60450ea-084c-4075-9133-a71f2a63456a	1672874	64	F				07/26/2021	10:35	False	False	False			A	High	07/30/2021	11:30	20	Waiting for exam results or completion	1	Ward or room	Yeah, don't step up	2021-07-27	6	4	1		TRUE	07/20/2021							False		2	Emergency	1
Epimed Monitor	General/Mixed	False	H1654	two	Public	Brazil	AGE2680	17	62441bcf-504e-4ac6-bbfe-e59ad1b12dbe	1673607	65	F				07/26/2021	20:30	False	False	False			A	High	08/15/2021	15:00	4	Uninformed	1	Ward or room	No		2	20			TRUE	07/24/2021							False		1	Ward/Room	1
Epimed Monitor	General/Mixed	False	H1654	two	Public	Brazil	AGE2680	17	876b9223-c97c-47e3-8c2b-ec2429b65421	1674034	70	M				07/29/2021	13:00	False	False	False			D	Death	01/08/2021	22:00		Uninformed	7	Death	No		2	3			TRUE	07/27/2021	D	Death	01/08/2021	5	Death	5	TRUE		1	Ward/Room	1
Epimed Monitor	General/Mixed	False	H1654	two	Public	Brazil	AGE2680	17	cfca2ce1-87cf-4fdf-9ca4-47ea23106853	1674149	62	M				07/30/2021	14:00	False	False	False			D	Death	08/13/2021	14:30		Uninformed	7	Death	No		1	14			TRUE	07/29/2021	D	Death	08/13/2021	5	Death	15	TRUE		1	Ward/Room	1
Epimed Monitor	General/Mixed	False	H1654	two	Public	Brazil	AGE2680	17	a28307f7-3243-4a5a-9db8-415e43c9ac9e	1674418	32	F				07/30/2021	17:40	False	False	False			A	High	07/08/2021	15:00	5	Waiting for family	1	Ward or room	No		0	8			TRUE	07/30/2021							False		1	Ward/Room	1
Epimed Monitor	General/Mixed	False	H1654	two	Public	Brazil	AGE2680	17	75cf047b-2f47-4d7c-8e91-732e72bbb3c4	1674612	70	M				07/31/2021	22:00	False	False	False			D	Death	08/28/2021	4:00 pm		Uninformed	7	Death	No		0	28			TRUE	07/31/2021	D	Death	08/28/2021	5	Death	28	TRUE		6	Transfer from another hospital/institution	1
Epimed Monitor	General/Mixed	False	H1654	two	Public	Brazil	AGE2680	17	b4e636c1-f243-4611-972e-5cd4d11e9e69	1674625	44	F				02/08/2021	17:00	False	False	False			D	Death	08/12/2021	20:34		Uninformed	7	Death	No		0	10			TRUE	02/08/2021	D	Death	08/12/2021	5	Death	10	TRUE		1	Ward/Room	1
Epimed Monitor	General/Mixed	False	H1654	two	Public	Brazil	AGE2680	17	fb3bd06d-a479-4131-a595-6e23de58fc9a	1674534	86	F				02/08/2021	23:30	False	False	False			D	Death	07/08/2021	14:00		Uninformed	7	Death	No		2	5			TRUE	07/31/2021	D	Death	07/08/2021	5	Death	7	TRUE		1	Ward/Room	1
Epimed Monitor	General/Mixed	False	H1654	two	Public	Brazil	AGE2680	17	9a1b0dc5-da97-4bd6-9548-d149262015c5	1674831	33	M				03/08/2021	09:00	False	False	False			A	High	08/15/2021	15:00	4	Uninformed	1	Ward or room	No		1	12			TRUE	02/08/2021							False		1	Ward/Room	1
Epimed Monitor	General/Mixed	False	H1654	two	Public	Brazil	AGE2680	17	e5d7b2e5-0814-4f8a-a6fd-bc69098c71c0	1674917	55	M				08/04/2021	22:00	False	False	False			D	Death	08/19/2021	06:15		Uninformed	7	Death	No		0	15			TRUE	08/04/2021	D	Death	08/19/2021	5	Death	15	TRUE		1	Ward/Room	1
Epimed Monitor	General/Mixed	False	H1654	two	Public	Brazil	AGE2680	17	f30b7168-9062-48f5-8993-4ad82f9791ea	1675803	82	M				08/14/2021	23:59	False	False	False			D	Death	08/17/2021	18:24		Uninformed	7	Death	No		0	3			TRUE	08/14/2021	D	Death	08/17/2021	5	Death	3	TRUE		1	Ward/Room	1
Epimed Monitor	General/Mixed	False	H1654	two	Public	Brazil	AGE2680	17	ef9fb799-cdd0-4c61-aa98-4912fc44f237	1676367	89	M				08/16/2021	03:30	False	False	False			D	Death	08/28/2021	4:00 pm		Uninformed	7	Death	No		0	12			TRUE	08/16/2021	D	Death	08/28/2021	5	Death	12	TRUE		6	Transfer from another hospital/institution	1
Epimed Monitor	General/Mixed	False	H1654	two	Public	Brazil	AGE2680	17	719f8700-d46a-4e50-b5df-2dbe00440108	1676425	57	F				08/19/2021	09:00	False	False	False			D	Death	09/21/2021	02:00		Uninformed	7	Death	No		2	33			TRUE	08/17/2021	D	Death	09/21/2021	5	Death	35	TRUE		1	Ward/Room	1
Epimed Monitor	General/Mixed	False	H1654	two	Public	Brazil	AGE2680	17	80aa2912-a38c-49f6-9965-e69b37408fa3	1676922	42	M				08/21/2021	18:30	False	False	False			A	High	08/31/2021	11:00	1	Uninformed	1	Ward or room	No		1	10			False	08/20/2021							False		1	Ward/Room	1
Epimed Monitor	General/Mixed	False	H1654	two	Public	Brazil	AGE2680	17	8455c276-76bd-431c-be0c-495bdda104d9	1677097	69	M				08/22/2021	09:00	False	False	False											No		0	32			TRUE	08/22/2021							False		1	Ward/Room	1
Epimed Monitor	General/Mixed	False	H1654	two	Public	Brazil	AGE2680	17	2c906d97-4bd9-4535-b231-87e51da1b669	1677142	79	F				08/22/2021	14:20	False	False	False			D	Death	09/05/2021	8:00 pm		Uninformed	7	Death	No		0	14			TRUE	08/22/2021	D	Death	09/05/2021	5	Death	14	TRUE		2	Emergency	1
Epimed Monitor	General/Mixed	False	H1654	two	Public	Brazil	AGE2680	17	2147cc34-8175-40a6-9c7d-6729c1edba54	1676921	54	F				08/22/2021	22:10	False	False	False			D	Death	09/11/2021	22:40		Uninformed	7	Death	No		1	20			TRUE	08/21/2021	D	Death	09/11/2021	5	Death	21	TRUE		1	Ward/Room	1
Epimed Monitor	General/Mixed	False	H1654	two	Public	Brazil	AGE2680	17	b36414b6-f8be-475d-adb3-d0197c9616b7	1677289	72	F				08/23/2021	17:00	False	False	False											No		0	31			TRUE	08/23/2021							False		2	Emergency	1
Epimed Monitor	General/Mixed	False	H1654	two	Public	Brazil	AGE2680	17	e624ddcc-0287-43e8-a2b9-fa4ce050448f	1678178	71	M				08/31/2021	01:00	False	False	False											No		0	23			TRUE	08/31/2021							False		6	Transfer from another hospital/institution	1
Epimed Monitor	General/Mixed	False	H1654	two	Public	Brazil	AGE3290	16	c542825f-3af2-41cf-b2d2-005acf372a19	1652721	67	M				03/04/2021	11:00	False	False	False			A	High	03/08/2021	14:30	0	Uninformed	4	Another hospital	No		40	4			TRUE	01/23/2021	A	High	03/08/2021	3	Another hospital	44	TRUE		1	Ward/Room	1
Epimed Monitor	General/Mixed	False	H1654	two	Public	Brazil	AGE3290	16	3c613639-652c-45d6-a145-a64e21a10332	1656807	65	M				03/04/2021	15:23	False	False	False			D	Death	03/09/2021	02:40		Uninformed	7	Death	No		0	5			TRUE	03/04/2021	D	Death	03/09/2021	5	Death	5	TRUE		2	Emergency	1
Epimed Monitor	General/Mixed	False	H1654	two	Public	Brazil	AGE3290	16	3a626f33-9fef-49a3-a497-69c32909fb86	1656819	80	M				03/04/2021	16:38	False	False	False			D	Death	03/06/2021	20:50		Uninformed	7	Death	No		0	2			TRUE	03/04/2021	D	Death	03/06/2021	5	Death	2	TRUE		6	Transfer from another hospital/institution	1
Epimed Monitor	General/Mixed	False	H1654	two	Public	Brazil	AGE3290	16	41122742-e870-4d15-9c73-eaa662308948	1656820	65	F				03/04/2021	16:39	False	False	False			D	Death	03/09/2021	22:00		Uninformed	7	Death	No		0	5			TRUE	03/04/2021	D	Death	03/09/2021	5	Death	5	TRUE		2	Emergency	1
Epimed Monitor	General/Mixed	False	H1654	two	Public	Brazil	AGE3290	16	b603fa0c-3b09-428a-99f1-b274686ac49a	1656862	61	M				03/06/2021	12:00 pm	False	False	False			D	Death	03/25/2021	08:30		Uninformed	7	Death	No		1	19			TRUE	03/05/2021	D	Death	03/25/2021	5	Death	20	TRUE		1	Ward/Room	1
Epimed Monitor	General/Mixed	False	H1654	two	Public	Brazil	AGE3290	16	873575e8-cf21-4f43-8cc6-a018396da092	1656838	43	F				03/07/2021	4:00 pm	False	False	False			D	Death	03/19/2021	18:30		Uninformed	7	Death	No		3	12			TRUE	03/04/2021	D	Death	03/19/2021	5	Death	15	TRUE		1	Ward/Room	1
Epimed Monitor	General/Mixed	False	H1654	two	Public	Brazil	AGE3290	16	ef99f744-9d2b-460d-b75e-25c8b4a59a6c	1656991	56	M				03/08/2021	18:25	False	False	False			D	Death	03/15/2021	03:10		Uninformed	7	Death	No		0	7			TRUE	03/08/2021	D	Death	03/15/2021	5	Death	7	TRUE		2	Emergency	1
Epimed Monitor	General/Mixed	False	H1654	two	Public	Brazil	AGE3290	16	3e4c95fe-51b5-4b93-a4c5-c5fef79f1c2e	1656999	64	F				03/09/2021	11:00	False	False	False			D	Death	03/22/2021	23:30		Uninformed	7	Death	No		0	13			TRUE	03/09/2021	D	Death	03/22/2021	5	Death	13	TRUE		2	Emergency	1
Epimed Monitor	General/Mixed	False	H1654	two	Public	Brazil	AGE3290	16	7e1ff4ab-5a89-4fd8-a41f-71d296e1b1df	1656700	48	M				03/10/2021	20:45	False	False	False			D	Death	03/16/2021	8 o'clock		Uninformed	7	Death	No		7	6			TRUE	03/03/2021	D	Death	03/16/2021	5	Death	13	TRUE		1	Ward/Room	1
Epimed Monitor	General/Mixed	False	H1654	two	Public	Brazil	AGE3290	16	1d4907f1-e269-4a9f-bc26-d4e4b2033abf	1656893	74	M				03/10/2021	22:40	False	False	False			D	Death	03/22/2021	07:15		Uninformed	7	Death	No		4	12			TRUE	03/06/2021	D	Death	03/22/2021	5	Death	16	TRUE		1	Ward/Room	1
Epimed Monitor	General/Mixed	False	H1654	two	Public	Brazil	AGE3290	16	82dd2acc-4434-4a07-9aa0-8aa8a0ad2957	1657593	67	M				03/15/2021	16:10	False	False	False			D	Death	03/27/2021	4:00 am		Uninformed	7	Death	No		0	12			TRUE	03/15/2021	D	Death	03/27/2021	5	Death	12	TRUE		2	Emergency	1
Epimed Monitor	General/Mixed	False	H1654	two	Public	Brazil	AGE3290	16	9e7cdbc1-655b-4752-923e-8cb341db479a	1656983	57	M				03/16/2021	4:00 pm	False	False	False			D	Death	03/24/2021	08:50		Uninformed	7	Death	No		8	8			TRUE	03/08/2021	D	Death	03/24/2021	5	Death	16	TRUE		1	Ward/Room	1
Epimed Monitor	General/Mixed	False	H1654	two	Public	Brazil	AGE3290	16	fe06120a-876d-4870-b5b5-d5c4a62c5ba0	1656867	74	M				03/21/2021	13:28	False	False	False			D	Death	04/03/2021	04:50		Uninformed	7	Death	No		16	13			TRUE	03/05/2021	D	Death	04/03/2021	5	Death	29	TRUE		2	Emergency	1
Epimed Monitor	General/Mixed	False	H1654	two	Public	Brazil	AGE3290	16	84080062-8222-44cb-8947-1650c2e0e084	1684154	81	M				03/22/2021	11:30	False	False	False			D	Death	03/26/2021	22:15		Uninformed	7	Death	No		2	4			TRUE	03/20/2021	D	Death	03/26/2021	5	Death	6	TRUE	SUS (Unified Health System)	1	Ward/Room	1
Epimed Monitor	General/Mixed	False	H1654	two	Public	Brazil	AGE3290	16	47b1e1bf-d5b4-42be-81a8-c3081f69375e	1657760	61	M				03/24/2021	09:12	False	False	False			A	High	04/01/2021	11:35	2	Uninformed	3	Another hospital ICU/ICU	No		8	8			TRUE	03/16/2021	D	Death	04/18/2021	5	Death	33	TRUE		1	Ward/Room	1
Epimed Monitor	General/Mixed	False	H1654	two	Public	Brazil	AGE3290	16	e09cdf91-34d5-4e4e-b172-bc5b4cefab37	1657456	79	M				03/24/2021	17:00	False	False	False			D	Death	03/24/2021	20:20		Uninformed	7	Death	No		10	1			TRUE	03/14/2021	D	Death	03/24/2021	5	Death	10	TRUE		1	Ward/Room	1
Epimed Monitor	General/Mixed	False	H1654	two	Public	Brazil	AGE3290	16	e4e08d6a-f634-4316-ad79-9022b900ae35	1658237	42	F				03/25/2021	09:14	False	False	False			D	Death	03/30/2021	03:30		Uninformed	7	Death	No		4	5			TRUE	03/21/2021	D	Death	03/30/2021	5	Death	9	TRUE		1	Ward/Room	1
Epimed Monitor	General/Mixed	False	H1654	two	Public	Brazil	AGE3290	16	7a42595a-8015-48a4-8d14-8dbc61dd5983	1658804	71	M				03/26/2021	10:00 am	False	False	False			D	Death	04/09/2021	20:50		Uninformed	7	Death	No		3	14			TRUE	03/23/2021	D	Death	04/09/2021	5	Death	17	TRUE		1	Ward/Room	1
Epimed Monitor	General/Mixed	False	H1654	two	Public	Brazil	AGE3290	16	739078e1-b1a8-4fc2-b7e0-2ca7b501c090	1657418	41	M				03/27/2021	09:00	False	False	False			D	Death	03/31/2021	18:45		Uninformed	7	Death	No		14	4			TRUE	03/13/2021	D	Death	03/31/2021	5	Death	18	TRUE	SUS (Unified Health System)	4	Another ICU/ICU in your hospital	1
Epimed Monitor	General/Mixed	False	H1654	two	Public	Brazil	AGE3290	16	291e90cf-3444-496e-98b8-fcb01d8cd683	1659003	53	F				03/27/2021	09:06	False	False	False			A	High	04/06/2021	14:00	3	Uninformed	1	Ward or room	No		1	10			TRUE	03/26/2021	A	High	04/13/2021	1	Residence	18	TRUE		1	Ward/Room	1
Epimed Monitor	General/Mixed	False	H1654	two	Public	Brazil	AGE3290	16	60d58af5-c694-4ca3-9a23-41855eadef15	1657904	74	F				03/30/2021	18:50	False	False	False			A	High	04/01/2021	11:40	1	Uninformed	1	Ward or room	No		13	2			TRUE	03/17/2021	A	High	04/19/2021	1	Residence	33	TRUE		1	Ward/Room	1
Epimed Monitor	General/Mixed	False	H1654	two	Public	Brazil	AGE3290	16	57fc19da-eccd-457f-ba7b-074178e8d24f	1659362	56	M				04/01/2021	11:00	False	False	False			A	High	04/19/2021	4:00 pm	6	No bed availability in the destination unit	1	Ward or room	No		2	18			TRUE	03/30/2021	A	High	04/22/2021	1	Residence	23	TRUE		1	Ward/Room	1
Epimed Monitor	General/Mixed	False	H1654	two	Public	Brazil	AGE3290	16	4d01b3eb-1e38-48ec-adfa-e558a198cad2	1656315	58	M				04/01/2021	11:00	False	False	False			D	Death	04/07/2021	23:00		Uninformed	7	Death	Yes, limit	2021-04-06	33	6	5		TRUE	02/27/2021	D	Death	04/07/2021	5	Death	39	TRUE		1	Ward/Room	1
Epimed Monitor	General/Mixed	False	H1654	two	Public	Brazil	AGE3290	16	e8e39528-2438-4407-8d56-b14019c0a057	1659773	57	F				04/03/2021	20:55	False	False	False			A	High	04/28/2021	19:37	5	Waiting for family	1	Ward or room	No		0	25			TRUE	04/03/2021	A	High	05/25/2021	1	Residence	52	TRUE		6	Transfer from another hospital/institution	1
Epimed Monitor	General/Mixed	False	H1654	two	Public	Brazil	AGE3290	16	a19f52e1-ea6c-4388-9f92-bea03dd9371b	1659786	75	M				04/04/2021	02:37	False	False	False			D	Death	04/06/2021	20:35		Uninformed	7	Death	No		0	2			TRUE	04/04/2021	D	Death	04/06/2021	5	Death	2	TRUE		2	Emergency	1
Epimed Monitor	General/Mixed	False	H1654	two	Public	Brazil	AGE3290	16	e56e6def-8f93-48cd-ab37-ca7b037f0d97	1659516	25	M	145	173	48.4	04/07/2021	08:30	False	False	False			A	High	04/16/2021	12:30		Uninformed	3	Another hospital ICU/ICU	No		7	9			TRUE	03/31/2021	A	High	05/24/2021	1	Residence	54	TRUE	SUS (Unified Health System)	1	Ward/Room	1
Epimed Monitor	General/Mixed	False	H1654	two	Public	Brazil	AGE3290	16	b8932250-52ec-4273-ae75-68169452bed0	1660360	55	M				04/07/2021	22:30	False	False	False			A	High	05/04/2021	15:44			3	Another hospital ICU/ICU	No		1	27			TRUE	04/06/2021	A	High	05/20/2021	1	Residence	44	TRUE		2	Emergency	1
Epimed Monitor	General/Mixed	False	H1654	two	Public	Brazil	AGE3290	16	b4b1504f-865c-4afb-93ac-c8287d496a89	1658557	70	M				04/08/2021	15:00	TRUE	False	False			A	High	04/11/2021	13:00	2	Uninformed	1	Ward or room	No		16	3			TRUE	03/23/2021	A	High	04/15/2021	1	Residence	23	TRUE		1	Ward/Room	1
Epimed Monitor	General/Mixed	False	H1654	two	Public	Brazil	AGE3290	16	d3887c83-7116-488b-b949-602afde38fd9	1657621	75	F				04/11/2021	11:00	TRUE	False	False			A	High	04/14/2021	13:00	3	Uninformed	1	Ward or room	No		27	3			TRUE	03/15/2021	D	Death	04/17/2021	5	Death	33	TRUE		1	Ward/Room	1
Epimed Monitor	General/Mixed	False	H1654	two	Public	Brazil	AGE3290	16	1eda68ed-b274-48cf-887d-9111b9ef53d0	1660338	32	F				04/11/2021	15:00	False	False	False			A	High	04/13/2021	15:26			3	Another hospital ICU/ICU	No		4	2			TRUE	04/07/2021	A	High	04/23/2021	1	Residence	16	TRUE		1	Ward/Room	1
Epimed Monitor	General/Mixed	False	H1654	two	Public	Brazil	AGE3290	16	9a502916-c71f-4bdb-99ed-e4f42d1d3ded	1659769	87	M				04/13/2021	22:00	False	False	False			D	Death	04/19/2021	00:15		Uninformed	7	Death	Yeah, don't step up	2021-04-17	10	6	4		TRUE	04/03/2021	D	Death	04/19/2021	5	Death	16	TRUE	SUS (Unified Health System)	1	Ward/Room	1
Epimed Monitor	General/Mixed	False	H1654	two	Public	Brazil	AGE3290	16	600d9790-7464-4f39-8a84-f43ef0571b36	1660905	54	F				04/14/2021	15:00	False	False	False			D	Death	04/22/2021	14:15		Uninformed	7	Death	No		2	8			TRUE	04/12/2021	D	Death	04/22/2021	5	Death	10	TRUE	SUS (Unified Health System)	1	Ward/Room	1
Epimed Monitor	General/Mixed	False	H1654	two	Public	Brazil	AGE3290	16	6ba7c15e-44e5-4f0d-918b-cb264d20c53e	1661513	55	M				04/16/2021	22:00	False	False	False			A	High	04/18/2021	11:36	2	Uninformed	1	Ward or room	No		1	2			TRUE	04/15/2021	A	High	04/28/2021	1	Residence	13	TRUE		1	Ward/Room	1
Epimed Monitor	General/Mixed	False	H1654	two	Public	Brazil	AGE3290	16	57460e5a-d856-4aec-b9f9-afaba1d8f2b3	1661722	66	M				04/18/2021	17:00	False	False	False			D	Death	05/16/2021	23:00		Uninformed	7	Death	No		0	28			TRUE	04/18/2021	D	Death	05/16/2021	5	Death	28	TRUE	SUS (Unified Health System)	6	Transfer from another hospital/institution	1
Epimed Monitor	General/Mixed	False	H1654	two	Public	Brazil	AGE3290	16	6e92454f-ef8b-4582-ba36-c8840310e975	1661945	40	M				04/20/2021	18:00	False	False	False			D	Death	05/10/2021	12:55		Uninformed	7	Death	No		1	20			TRUE	04/19/2021	D	Death	05/10/2021	5	Death	21	TRUE	SUS (Unified Health System)	1	Ward/Room	1
Epimed Monitor	General/Mixed	False	H1654	two	Public	Brazil	AGE3290	16	4fa6e0ef-0a7c-4469-9a65-98bc7f54765e	1661996	64	M				04/20/2021	19:08	False	False	False			D	Death	04/27/2021	01:00		Uninformed	7	Death	No		0	7			TRUE	04/20/2021	D	Death	04/27/2021	5	Death	7	TRUE	SUS (Unified Health System)	2	Emergency	1
Epimed Monitor	General/Mixed	False	H1654	two	Public	Brazil	AGE3290	16	4c6fdc4c-246a-4114-b378-bd3492c118b2	1661719	57	M				04/23/2021	14:26	False	False	False			A	High	04/26/2021	11:34	2	Uninformed	1	Ward or room	No		5	3			TRUE	04/18/2021	A	High	05/01/2021	1	Residence	13	TRUE		1	Ward/Room	1
Epimed Monitor	General/Mixed	False	H1654	two	Public	Brazil	AGE3290	16	f0044196-e83a-4030-b192-44a92851739b	1662393	62	M				04/27/2021	15:32	False	False	False			A	High	05/25/2021	13:00			3	Another hospital ICU/ICU	No		2	28			TRUE	04/25/2021	D	Death	06/06/2021	5	Death	42	TRUE	SUS (Unified Health System)	1	Ward/Room	1
Epimed Monitor	General/Mixed	False	H1654	two	Public	Brazil	AGE3290	16	3817651f-ec3e-419f-97c3-9e967e560bf0	1662399	69	F				04/27/2021	17:23	False	False	False			D	Death	05/20/2021	02:45		Uninformed	7	Death	No		2	23			TRUE	04/25/2021	D	Death	05/20/2021	5	Death	25	TRUE	SUS (Unified Health System)	1	Ward/Room	1
Epimed Monitor	General/Mixed	False	H1654	two	Public	Brazil	AGE3290	16	cf6f6d7e-23aa-46c9-a758-eedcd836dc9f	1663049	75	M				05/04/2021	20:18	False	False	False			A	High	05/05/2021	11:30	2	Uninformed	1	Ward or room	No		5	1			TRUE	04/29/2021	A	High	05/10/2021	1	Residence	11	TRUE		4	Another ICU/ICU in your hospital	1
Epimed Monitor	General/Mixed	False	H1654	two	Public	Brazil	AGE3290	16	2a77a4cc-c54b-4f85-9f1e-7b05ca70880b	1663617	55	F				05/05/2021	00:40	False	False	False			A	High	05/23/2021	11:00	3	Uninformed	1	Ward or room	No		0	18			TRUE	05/05/2021	A	High	05/30/2021	1	Residence	25	TRUE	SUS (Unified Health System)	6	Transfer from another hospital/institution	1
Epimed Monitor	General/Mixed	False	H1654	two	Public	Brazil	AGE3290	16	bf2a3fd5-546a-4b14-a31a-fbb62d28b7dd	1663718	40	M				05/05/2021	10:30	False	False	False			A	High	05/09/2021	15:15	3	Uninformed	1	Ward or room	No		0	4			TRUE	05/05/2021	A	High	05/12/2021	1	Residence	7	TRUE	SUS (Unified Health System)	6	Transfer from another hospital/institution	1
Epimed Monitor	General/Mixed	False	H1654	two	Public	Brazil	AGE3290	16	1953c715-b520-4219-9885-c7b7184b01b7	1663803	47	M				05/10/2021	17:39	False	False	False			D	Death	05/25/2021	08:35		Uninformed	7	Death	No		4	15			TRUE	05/06/2021	D	Death	05/25/2021	5	Death	19	TRUE	SUS (Unified Health System)	1	Ward/Room	1
Epimed Monitor	General/Mixed	False	H1654	two	Public	Brazil	AGE3290	16	0b51e301-05f6-4fcc-964e-9d3ed106dd68	1664105	66	F				05/11/2021	4:00 pm	False	False	False			D	Death	05/19/2021	19:20		Uninformed	7	Death	No		2	8			TRUE	05/09/2021	D	Death	05/19/2021	5	Death	10	TRUE	SUS (Unified Health System)	1	Ward/Room	1
Epimed Monitor	General/Mixed	False	H1654	two	Public	Brazil	AGE3290	16	e427bd92-d8cc-4127-a10e-8fdecfca0394	1664873	37	M				05/17/2021	11:00	False	False	False			A	High	07/16/2021	4:00 pm			3	Another hospital ICU/ICU	No		0	60			TRUE	05/16/2021							False		1	Ward/Room	1
Epimed Monitor	General/Mixed	False	H1654	two	Public	Brazil	AGE3290	16	1c2034c3-c315-47c4-83f8-94047476fad0	1664664	55	M				05/19/2021	22:45	False	False	False			D	Death	05/24/2021	4:00 pm		Uninformed	7	Death	No		6	5			TRUE	05/13/2021	D	Death	05/24/2021	5	Death	11	TRUE		1	Ward/Room	1
Epimed Monitor	General/Mixed	False	H1654	two	Public	Brazil	AGE3290	16	f34908e3-860c-4bf0-8436-7c7aa73cd9a9	1665428	33	M				05/20/2021	11:00	False	False	False			D	Death	06/03/2021	17:05		Uninformed	7	Death	No		0	14			TRUE	05/20/2021	D	Death	06/03/2021	5	Death	14	TRUE		1	Ward/Room	1
Epimed Monitor	General/Mixed	False	H1654	two	Public	Brazil	AGE3290	16	940ceb34-087a-4ecd-8cc6-5a40fca7e950	1665723	45	M				05/23/2021	15:40	False	False	False			D	Death	05/28/2021	19:02		Uninformed	7	Death	No		1	5			TRUE	05/22/2021	D	Death	05/28/2021	5	Death	6	TRUE		1	Ward/Room	1
Epimed Monitor	General/Mixed	False	H1654	two	Public	Brazil	AGE3290	16	747bde0c-50ad-4157-982d-fb817182111d	1666095	29	M				05/25/2021	11:00	False	False	False			A	High	05/26/2021	13:02			3	Another hospital ICU/ICU	No		1	1			TRUE	05/24/2021							False		1	Ward/Room	1
Epimed Monitor	General/Mixed	False	H1654	two	Public	Brazil	AGE3290	16	c4913c0e-6064-48e8-852a-98bbd8b9f943	1664183	54	M				05/25/2021	13:00	False	False	False			D	Death	06/07/2021	06:15		Uninformed	7	Death	No		13	13			TRUE	05/12/2021	D	Death	06/07/2021	5	Death	26	TRUE		1	Ward/Room	1
Epimed Monitor	General/Mixed	False	H1654	two	Public	Brazil	AGE3290	16	40a1f46e-7ab6-4d07-a7ab-50989fa899a6	1665087	46	M				05/25/2021	19:40	False	False	False			D	Death	06/07/2021	21:00		Uninformed	7	Death	No		8	13			TRUE	05/17/2021	D	Death	06/07/2021	5	Death	21	TRUE		1	Ward/Room	1
Epimed Monitor	General/Mixed	False	H1654	two	Public	Brazil	AGE3290	16	747bde0c-50ad-4157-982d-fb817182111d	1666095	29	M				05/26/2021	13:23	False	False	False			A	High	06/10/2021	17:00	7	No bed availability in the destination unit	1	Ward or room	No		2	15			TRUE	05/24/2021							False		1	Ward/Room	1
Epimed Monitor	General/Mixed	False	H1654	two	Public	Brazil	AGE3290	16	efc4f3b5-b77f-4cd6-8159-96597d7a6ed5	1665728	61	F				05/28/2021	23:30	False	False	False			A	High	06/09/2021	09:00	2	Uninformed	1	Ward or room	No		6	12			TRUE	05/22/2021							False		1	Ward/Room	1
Epimed Monitor	General/Mixed	False	H1654	two	Public	Brazil	AGE3290	16	f85333cd-e052-41e5-9a36-66cf2981f894	1667424	56	M				06/03/2021	21:00	False	False	False			D	Death	06/14/2021	19:30		Uninformed	7	Death	No		0	11			TRUE	06/03/2021	D	Death	06/14/2021	5	Death	11	TRUE		1	Ward/Room	1
Epimed Monitor	General/Mixed	False	H1654	two	Public	Brazil	AGE3290	16	a35ba822-b4b2-45f5-a213-58da6ba87808	1667755	59	M				06/07/2021	11:00	False	False	False			D	Death	06/08/2021	00:10		Uninformed	7	Death	No		1	1			TRUE	06/06/2021	D	Death	06/08/2021	5	Death	2	TRUE		1	Ward/Room	1
Epimed Monitor	General/Mixed	False	H1654	two	Public	Brazil	AGE3290	16	790d214d-434c-479c-b6c1-91bd06bb89c7	1667478	46	M				06/08/2021	11:00	False	False	False			D	Death	06/13/2021	11:30		Uninformed	7	Death	No		5	5			TRUE	06/03/2021	D	Death	06/13/2021	5	Death	10	TRUE		1	Ward/Room	1
Epimed Monitor	General/Mixed	False	H1654	two	Public	Brazil	AGE3290	16	98be3675-d503-4d3e-89a7-86a66bb02b70	1667654	55	F				06/08/2021	16:10	False	False	False			D	Death	07/15/2021	16:55		Uninformed	7	Death	No		0	37			TRUE	06/08/2021	D	Death	07/15/2021	5	Death	37	TRUE		6	Transfer from another hospital/institution	1
Epimed Monitor	General/Mixed	False	H1654	two	Public	Brazil	AGE3290	16	d6a1af22-ce0d-4848-8920-5e153c6a8766	1668272	52	M				06/09/2021	12:00 pm	False	False	False			D	Death	06/13/2021	10:00 am		Uninformed	7	Death	No		0	4			TRUE	06/09/2021	D	Death	06/13/2021	5	Death	4	TRUE		6	Transfer from another hospital/institution	1
Epimed Monitor	General/Mixed	False	H1654	two	Public	Brazil	AGE3290	16	795e2849-2c23-4799-8edc-9c76ec259e7a	1668289	53	M				06/10/2021	22:30	False	False	False			D	Death	06/13/2021	06:30		Uninformed	7	Death	No		0	3			TRUE	06/10/2021	D	Death	06/13/2021	5	Death	3	TRUE		1	Ward/Room	1
Epimed Monitor	General/Mixed	False	H1654	two	Public	Brazil	AGE3290	16	4c1ab18e-f5b7-46c7-88e2-655f58ad868f	1668714	41	M				06/13/2021	21:30	False	False	False			A	High	06/23/2021	10:00 am	2	Uninformed	1	Ward or room	No		0	10			TRUE	06/13/2021							False		1	Ward/Room	1
Epimed Monitor	General/Mixed	False	H1654	two	Public	Brazil	AGE3290	16	9f2576c1-2f6a-43c3-a6b9-5d911b7089ba	1668291	55	M				06/13/2021	22:15	False	False	False			D	Death	07/04/2021	08:20		Uninformed	7	Death	No		3	21			TRUE	06/10/2021	D	Death	07/04/2021	5	Death	24	TRUE		1	Ward/Room	1
Epimed Monitor	General/Mixed	False	H1654	two	Public	Brazil	AGE3290	16	819f7ed4-ff5b-4a81-8976-03bf87db5383	1668718	33	F				06/13/2021	23:00	False	False	False			D	Death	06/21/2021	10:50		Uninformed	7	Death	No		0	8			TRUE	06/13/2021	D	Death	06/21/2021	5	Death	8	TRUE		6	Transfer from another hospital/institution	1
Epimed Monitor	General/Mixed	False	H1654	two	Public	Brazil	AGE3290	16	ae004b48-7fcf-4a14-84a2-8afe8870b17e	1668692	53	M				06/15/2021	11:00	False	False	False			A	High	06/22/2021	11:00	2	Uninformed			No		1	7			TRUE	06/14/2021							False		1	Ward/Room	1
Epimed Monitor	General/Mixed	False	H1654	two	Public	Brazil	AGE3290	16	bb8a9889-a789-4a9d-9fe3-78a12d40c1da	1669374	65	F				06/22/2021	17:47	False	False	False			A	High	06/27/2021	13:00	3	Uninformed	1	Ward or room	No		4	5			TRUE	06/18/2021							False		1	Ward/Room	1
Epimed Monitor	General/Mixed	False	H1654	two	Public	Brazil	AGE3290	16	28eef7c9-132f-4afc-8049-48aa40a8c01d	1669851	46	M				06/22/2021	21:30	False	False	False			D	Death	07/12/2021	06:15		Uninformed	7	Death	No		0	20			TRUE	06/22/2021	D	Death	07/12/2021	5	Death	20	TRUE		1	Ward/Room	1
Epimed Monitor	General/Mixed	False	H1654	two	Public	Brazil	AGE3290	16	3ec94576-3a91-4547-a3ce-31e1f46f8527	1669814	85	M				06/23/2021	15:00	False	False	False			D	Death	07/15/2021	08:20		Uninformed	7	Death	No		0	22			TRUE	06/23/2021	D	Death	07/15/2021	5	Death	22	TRUE		1	Ward/Room	1
Epimed Monitor	General/Mixed	False	H1654	two	Public	Brazil	AGE3290	16	62c0e187-f365-4195-a795-c049349b12c4	1669349	37	M				06/28/2021	09:00	False	False	False			A	High	06/29/2021	13:30	3	Uninformed	1	Ward or room	No		10	1			TRUE	06/18/2021							False		1	Ward/Room	1
Epimed Monitor	General/Mixed	False	H1654	two	Public	Brazil	AGE3290	16	332e4925-b06b-4136-82ae-eb6afaa3931c	1670328	53	F				06/29/2021	17:30	False	False	False			D	Death	07/15/2021	23:05		Uninformed	7	Death	No		4	16			TRUE	06/25/2021	D	Death	07/15/2021	5	Death	20	TRUE		6	Transfer from another hospital/institution	1
Epimed Monitor	General/Mixed	False	H1654	two	Public	Brazil	AGE3290	16	d2acd3d7-7edf-42a0-940c-19811a513adb	1667091	32	M				07/04/2021	21:30	TRUE	False	False			A	High	07/06/2021	15:00	2	Uninformed	1	Ward or room	No		32	2			False	06/02/2021							False		1	Ward/Room	1
Epimed Monitor	General/Mixed	False	H1654	two	Public	Brazil	AGE3290	16	5ad3393f-78bf-4c61-b791-269db452954b	1671770	69	M				07/07/2021	13:00	False	False	False			A	High	07/16/2021	4:00 pm			3	Another hospital ICU/ICU	No		0	9			TRUE	07/07/2021	D	Death	07/21/2021	5	Death	14	TRUE		6	Transfer from another hospital/institution	1
[truncated: 24 more columns]

## Sheet: Folha3
	Comorbidity
	SuiteName	ProductName	Readmission	HospitalCode	HospitalTypeCode	HospitalTypeName	CountryName	UnitCode	Beds	EpimedCode	MedicalRecord	Age	Date of admission to the Unit	Time of admission to the Unit	Admission type	Readmission	Re-admission in 24 hours	Readmission in 48 hours	Unit Outcome	Hospital Outcome	Decision on palliative care	Permanence in the Unit	Stay in the Hospital	Chronic health status	NYHA Classification 2 or 3	NYHA Classification 4	Non-dialysis chronic renal failure	Dialysis Chronic Renal Failure	Cirrhosis Child A or B	Cirrhosis Child C	Liver Failure	Locoregional solid tumor	Metastatic Solid Tumor	Tumor site	Malignant hematological disease	Type of malignant hematological disease	Name of malignant hematological disease	Immunosuppression	severe COPD	Use of Steoids	AIDS	Systemic Arterial Hypertension	Asthma	Uncomplicated diabetes	Complicated diabetes	Angina	Previous Acute Myocardial Infarction	Arrhythmia	Deep vein thrombosis
	Epimed Monitor	General/Mixed	False	H1654	two	Public	Brazil	AGE2182	13	1215e475-d3a2-45f0-ae01-14a673c4130b	1630831	58	2020-04-01	14:10	Clinic	False	False	False	High	High	No	49	49	Independent
	Epimed Monitor	General/Mixed	False	H1654	two	Public	Brazil	AGE2182	13	b048e976-a926-401c-ab78-d6fea8e1e0f5	1630842	39	2020-04-02	10:00 am	Clinic	False	False	False	High	High	No	4	7	Independent
	Epimed Monitor	General/Mixed	False	H1654	two	Public	Brazil	AGE2182	13	b244f33f-3218-4c61-90db-03d203bf64ee	1630840	68	2020-04-05	16:30	Clinic	False	False	False	High	High	No	2	10	Independent	TRUE	False	False	False	False	False	False	False	False		False			False	False	False	False	TRUE	False	False	False	False	False	False	False
	Epimed Monitor	General/Mixed	False	H1654	two	Public	Brazil	AGE2182	13	c992f356-eecb-46a9-bd18-b1670af394b1	542774	14	2020-04-19	21:25	Clinic	False	False	False			No	522		Restricted/bed-bound	False	False	False	False	False	False	False	False	False		False			False	False	False	False	False	False	False	False	False	False	False	False
	Epimed Monitor	General/Mixed	False	H1654	two	Public	Brazil	AGE2182	13	931eca04-f5e2-41fa-8816-4b94dfaa505e	1631566	53	2020-04-21	11:30	Clinic	False	False	False	High	High	No	37	38	Independent	False	False	False	False	False	False	False	False	False		False			False	False	False	False	False	False	False	TRUE	False	False	False	False
	Epimed Monitor	General/Mixed	False	H1654	two	Public	Brazil	AGE2182	13	121a44e1-af91-4d30-8c39-c408d0a6f875	1632733	0	2020-05-20	14:30	Clinic	False	False	False	High	High	No	5	8	Independent	False	False	False	False	False	False	False	False	False		False			False	False	False	False	TRUE	False	False	False	False	False	False	False
	Epimed Monitor	General/Mixed	False	H1654	two	Public	Brazil	AGE2182	13	e878e7c0-8c12-414b-b82a-7954e30993f0	257513	81	2020-05-26	12:31	Clinic	False	False	False	High	High	No	2	7	Need for assistance	TRUE	False	False	False	False	False	False	TRUE	False	Large intestine/anal canal	False			False	False	False	False	False	False	False	False	False	False	False	False
	Epimed Monitor	General/Mixed	False	H1654	two	Public	Brazil	AGE2182	13	c42f6d05-c47a-4b88-91ed-f552b3b74303	1085052	41	2020-06-05	23:00	Clinic	False	False	False	High	High	No	11	11	Independent
	Epimed Monitor	General/Mixed	False	H1654	two	Public	Brazil	AGE2182	13	7adafb3c-d578-44ae-971b-764490341bb5	1633347	86	2020-06-09	11:00	Clinic	False	False	False	Death	Death	Yeah, don't step up	20	21	Need for assistance	False	False	False	False	False	False	False	False	False		False			False	False	False	False	TRUE	False	False	False	False	TRUE	False	False
	Epimed Monitor	General/Mixed	False	H1654	two	Public	Brazil	AGE2182	13	edd6d4ed-b704-4f36-b853-3d495e31aa55	1633321	53	2020-06-10	11:30	Clinic	False	False	False	High	High	No	7	11	Independent
	Epimed Monitor	General/Mixed	False	H1654	two	Public	Brazil	AGE2182	13	ccb17d2f-df19-4373-8162-a538cb3919f4	1633543	56	2020-06-15	09:30	Clinic	False	False	False	High	High	No	26	32	Independent
	Epimed Monitor	General/Mixed	False	H1654	two	Public	Brazil	AGE2182	13	d9cc5f07-08af-4f53-b227-e024ed5ea702	1633646	70	2020-06-16	17:40	Clinic	False	False	False	Death	Death	No	29	29	Independent	False	False	False	False	False	False	False	False	False		False			False	False	False	False	False	False	False	False	False	False	False	False
	Epimed Monitor	General/Mixed	False	H1654	two	Public	Brazil	AGE2182	13	1e27aaed-789c-4931-b106-a8c7f6b2c22b	1633747	47	2020-06-19	17:30	Clinic	False	False	False	High	High	No	7	8	Independent
	Epimed Monitor	General/Mixed	False	H1654	two	Public	Brazil	AGE2182	13	f8467d3e-c68c-4a58-a078-fc2fb98c8ce0	1633855	61	2020-06-23	11:00	Clinic	False	False	False	High	High	No	3	5	Independent	False	False	False	False	False	False	False	False	False		False			False	False	False	False	TRUE	False	TRUE	False	False	False	False	False
	Epimed Monitor	General/Mixed	False	H1654	two	Public	Brazil	AGE2182	13	49caa9de-a02e-44e5-b4dc-e3b8ee15d0c3	1634208	65	2020-06-27	18:29	Clinic	False	False	False	Death	Death	No	12	12	Independent	False	False	False	False	False	False	False	False	False		False			False	False	False	False	TRUE	False	False	False	False	False	False	False
	Epimed Monitor	General/Mixed	False	H1654	two	Public	Brazil	AGE2182	13	7ad54699-6b5f-4792-86d4-44f2031c7f0c	2410416	81	2020-06-27	21:00	Clinic	False	False	False	Death	Death	No	7	7	Independent	TRUE	False	False	False	False	False	False	False	False		False			False	TRUE	False	False	False	False	False	False	False	False	False	False
	Epimed Monitor	General/Mixed	False	H1654	two	Public	Brazil	AGE2182	13	efd2948b-65dd-4634-bc82-173c6e946ec8	1634214	69	2020-06-29	12:00 pm	Clinic	False	False	False	High	High	No	5	16	Independent	False	False	False	False	False	False	False	False	False		False			False	TRUE	False	False	TRUE	False	TRUE	False	False	False	False	False
	Epimed Monitor	General/Mixed	False	H1654	two	Public	Brazil	AGE2182	13	30510009-a764-4c16-91bf-06420fd2ea0a	1634321	84	2020-06-29	21:30	Clinic	False	False	False	High	Death	No	9	10	Independent	False	False	False	False	False	False	False	False	False		False			False	False	False	False	False	False	False	TRUE	False	False	False	False
	Epimed Monitor	General/Mixed	False	H1654	two	Public	Brazil	AGE2182	13	025c8399-ee8c-482b-ba98-750cac38f554	1582631	77	2020-06-30	22:00	Clinic	False	False	False	High	High	No	3	20	Restricted/bed-bound	False	False	False	False	False	False	False	False	False		False			False	False	False	False	TRUE	False	TRUE	False	False	False	False	False
	Epimed Monitor	General/Mixed	False	H1654	two	Public	Brazil	AGE2182	13	8bc5253e-0d3f-41bf-8215-7e028b7ac594	1634128	75	2020-07-01	19:30	Clinic	False	False	False	High	High	No	8	15	Restricted/bed-bound
	Epimed Monitor	General/Mixed	False	H1654	two	Public	Brazil	AGE2182	13	b190c835-20f2-4948-9ac4-863961e44772	1634566	71	2020-07-02	22:00	Clinic	False	False	False	High	High	No	5	8	Need for assistance	TRUE	False	False	False	False	False	False	False	False		False			False	False	False	False	TRUE	False	False	False	False	False	False	False
	Epimed Monitor	General/Mixed	False	H1654	two	Public	Brazil	AGE2182	13	a11ec96f-ab1f-49a9-a6ee-4d3ab973ef32	1634663	80	2020-07-03	16:30	Clinic	False	False	False	High	Death	No	5	7	Restricted/bed-bound	False	False	False	False	False	False	False	False	False		False			False	False	False	False	False	False	False	False	False	False	False	False
	Epimed Monitor	General/Mixed	False	H1654	two	Public	Brazil	AGE2182	13	261777c1-676b-42df-b6fd-01724805faec	1634844	63	2020-07-06	18:10	Clinic	False	False	False	Death	Death	No	20	20	Independent	False	False	False	False	False	False	False	False	False		False			False	False	False	False	False	False	TRUE	False	False	False	False	False
	Epimed Monitor	General/Mixed	False	H1654	two	Public	Brazil	AGE2182	13	e59e7617-439a-4b9b-b251-9aa2cf0cd65c	1634285	69	2020-07-07	09:15	Clinic	False	False	False	Death	Death	No	1	9	Need for assistance	TRUE	False	False	False	False	False	False	False	False		False			False	TRUE	False	False	TRUE	False	False	TRUE	False	False	False	False
	Epimed Monitor	General/Mixed	False	H1654	two	Public	Brazil	AGE2182	13	f9da3280-d9e0-46f9-9cd1-9e2e709d66b0	1635064	65	2020-07-08	21:00	Clinic	False	False	False	High	Death	No	26	57	Independent	False	False	False	False	False	False	False	False	False		False			False	False	False	False	TRUE	False	False	False	False	False	False	False
	Epimed Monitor	General/Mixed	False	H1654	two	Public	Brazil	AGE2182	13	7f4d7edf-1a48-41c0-b97a-3f973862dfde	1634661	63	2020-07-08	22:00	Clinic	False	False	False	High	High	No	1	14	Restricted/bed-bound	TRUE	False	False	False	False	False	False	False	False		False			False	False	False	False	False	False	False	False	False	False	False	False
	Epimed Monitor	General/Mixed	False	H1654	two	Public	Brazil	AGE2182	13	bccc8dc6-d5ca-4830-b549-e821aea1bb9f	1635299	66	2020-07-10	17:41	Clinic	False	False	False	Death	Death	No	4	4	Independent	False	False	False	False	False	TRUE	TRUE	False	False		False			False	False	False	False	TRUE	False	TRUE	False	False	False	False	False
	Epimed Monitor	General/Mixed	False	H1654	two	Public	Brazil	AGE2182	13	6b16c039-9f3c-49b4-8487-7b8cc7f9efe5	1635234	31	2020-07-11	05:00	Clinic	False	False	False	High	High	No	4	9	Independent
	Epimed Monitor	General/Mixed	False	H1654	two	Public	Brazil	AGE2182	13	5a6a5a43-e30e-49b7-a2cd-5c8f04e6966d	1635366	40	2020-07-12	13:00	Clinic	False	False	False	High	High	No	20	22	Independent	False	False	False	False	False	False	False	False	False		False			TRUE	False	TRUE	False	False	False	False	False	False	False	False	False
	Epimed Monitor	General/Mixed	False	H1654	two	Public	Brazil	AGE2182	13	55f3569b-da2a-4f3b-9383-01d97309d06e	1635313	70	2020-07-12	22:05	Clinic	False	False	False	High	High	No	31	55	Independent	False	False	False	False	False	False	False	False	False		False			False	False	False	False	TRUE	False	TRUE	False	False	False	False	False
	Epimed Monitor	General/Mixed	False	H1654	two	Public	Brazil	AGE2182	13	64f6913e-ede0-438e-8408-57b6ee12062c	1635365	45	2020-07-14	11:00	Clinic	False	False	False	High	High	No	14	17	Independent	False	False	False	False	False	False	False	False	False		False			False	False	False	False	False	TRUE	False	False	False	False	False	False
	Epimed Monitor	General/Mixed	False	H1654	two	Public	Brazil	AGE2182	13	9633bcde-df90-42c6-9b90-3fada853ea16	125106	62	2020-07-17	22:30	Clinic	False	False	False	Death	Death	No	23	23	Independent	False	False	False	False	False	False	False	False	False		False			False	False	False	False	TRUE	False	False	False	False	False	False	False
	Epimed Monitor	General/Mixed	False	H1654	two	Public	Brazil	AGE2182	13	5ff25b53-aeea-4c8b-bb29-116026024792	1635764	77	2020-07-20	09:23	Clinic	False	False	False	Death	Death	No	9	13	Independent	False	False	TRUE	False	False	False	False	False	False		False			False	False	False	False	False	False	TRUE	False	False	False	False	False
	Epimed Monitor	General/Mixed	False	H1654	two	Public	Brazil	AGE2182	13	869d0cfb-31c7-41ae-9314-54c97624ef81	1636029	75	2020-07-20	17:00	Clinic	False	False	False	High	High	No	8	11	Independent	False	False	False	False	False	False	False	False	False		False			False	False	False	False	TRUE	False	TRUE	False	False	False	False	False
	Epimed Monitor	General/Mixed	False	H1654	two	Public	Brazil	AGE2182	13	ddac4209-22fb-440d-b038-1f924c8a36e5	320737	69	2020-07-20	18:59	Clinic	False	False	False	High	High	No	5	6	Independent	False	False	False	False	False	False	False	False	False		False			False	False	False	False	False	False	False	False	False	TRUE	False	False
	Epimed Monitor	General/Mixed	False	H1654	two	Public	Brazil	AGE2182	13	3f43d4ca-09ce-41c3-a18d-6e09af58ad22	710124	65	2020-07-21	19:00	Clinic	False	False	False	High	High	No	3	11	Independent	False	False	False	False	False	False	False	False	False		False			False	False	False	False	False	False	False	False	False	False	False	False
	Epimed Monitor	General/Mixed	False	H1654	two	Public	Brazil	AGE2182	13	81d7a3f4-5483-41bf-ad09-d2bda6502a9f	1089819	38	2020-07-25	19:45	Clinic	False	False	False	High	High	No	13	30	Independent	False	False	TRUE	False	False	False	False	False	False		False			False	False	False	False	TRUE	False	False	False	False	False	False	False
	Epimed Monitor	General/Mixed	False	H1654	two	Public	Brazil	AGE2182	13	a05addfa-3127-4821-b1bd-13ae12b3fa16	713111	60	2020-07-27	00:20	Clinic	False	False	False	High	High	No	14	15	Independent
	Epimed Monitor	General/Mixed	False	H1654	two	Public	Brazil	AGE2182	13	4e94c49d-fe83-453d-a907-59a5be11f2d8	383279	75	2020-07-27	23:53	Clinic	False	False	False	Death	Death	No	1	1	Independent	False	False	False	False	False	False	False	False	False		False			False	TRUE	False	False	False	False	False	False	False	False	False	False
	Epimed Monitor	General/Mixed	False	H1654	two	Public	Brazil	AGE2182	13	523602bf-7884-44ff-a051-a83c12b4f5e8	1636831	48	2020-07-31	13:40	Clinic	False	False	False	High	High	No	10	15	Independent
	Epimed Monitor	General/Mixed	False	H1654	two	Public	Brazil	AGE2182	13	a458eb9b-54af-4fe1-a97f-87e5956e37d1	1090321	73	2020-07-31	23:10	Clinic	False	False	False	High	High	No	10	10	Independent	False	False	TRUE	False	False	False	False	False	False		False			False	False	False	False	TRUE	False	False	False	False	False	False	False
	Epimed Monitor	General/Mixed	False	H1654	two	Public	Brazil	AGE2182	13	fed831a6-4a70-46e4-8e7d-3ee066422cc4	224806	95	2020-08-01	22:30	Clinic	False	False	False	High	High	No	1	10	Need for assistance	TRUE	False	False	False	False	False	False	False	False		False			False	TRUE	False	False	False	False	False	False	False	False	False	False
	Epimed Monitor	General/Mixed	False	H1654	two	Public	Brazil	AGE2182	13	123754c4-b874-4b07-9ded-8b21c9d3ad9a	282450	71	2020-08-02	23:30	Clinic	False	False	False	High	High	No	5	6	Independent	False	False	False	TRUE	False	False	False	False	False		False			False	False	False	False	TRUE	False	False	False	False	False	False	False
	Epimed Monitor	General/Mixed	False	H1654	two	Public	Brazil	AGE2182	13	daecd42b-5049-48ce-948e-ea8cb358227b	219767	73	2020-08-03	21:40	Clinic	False	False	False	Death	Death	No	17	21	Independent	False	False	False	False	False	False	False	False	False		False			False	False	False	False	TRUE	False	False	False	False	False	False	False
	Epimed Monitor	General/Mixed	False	H1654	two	Public	Brazil	AGE2182	13	1c1e9824-b72c-4eab-a3bc-2b94f0881b08	1367159	78	2020-08-04	14:30	Clinic	False	False	False	Death	Death	No	3	7	Need for assistance	False	False	False	False	False	False	False	False	False		False			False	False	False	False	TRUE	False	TRUE	False	False	False	False	False
	Epimed Monitor	General/Mixed	False	H1654	two	Public	Brazil	AGE2182	13	01ca5e88-1cb1-4b84-b768-7b1b0dbacc9b	90650	77	2020-08-05	23:30	Clinic	False	False	False	Death	Death	No	10	12	Need for assistance	TRUE	False	False	False	False	False	False	False	False		False			False	False	False	False	TRUE	False	False	TRUE	False	False	False	False
	Epimed Monitor	General/Mixed	False	H1654	two	Public	Brazil	AGE2182	13	8384526d-193d-44be-8aa2-1797a508e8ef	1637839	51	2020-08-11	07:57	Clinic	False	False	False	Death	Death	No	30	33	Independent
	Epimed Monitor	General/Mixed	False	H1654	two	Public	Brazil	AGE2182	13	1236551c-f657-4fed-8abc-d772c04b0079	1637894	75	2020-08-11	11:31	Clinic	False	False	False	Death	Death	No	19	21	Independent	False	False	False	False	False	False	False	False	False		False			False	False	False	False	TRUE	False	TRUE	False	False	False	False	False
	Epimed Monitor	General/Mixed	False	H1654	two	Public	Brazil	AGE2182	13	bcc39dc0-56a1-4f1c-9128-d83a084cdaad	1085149	75	2020-08-11	17:50	Clinic	False	False	False	Death	Death	No	11	11	Independent	False	False	False	False	False	False	False	False	False		False			False	TRUE	False	False	TRUE	False	False	False	False	False	False	False
	Epimed Monitor	General/Mixed	False	H1654	two	Public	Brazil	AGE2182	13	4b133dc5-2c05-4730-921f-c7abe1dcf2d0	1638039	45	2020-08-11	21:30	Clinic	False	False	False	High	High	No	6	10	Independent
	Epimed Monitor	General/Mixed	False	H1654	two	Public	Brazil	AGE2182	13	3f5c0009-c5d8-48a7-9a71-4af1f11cac8d	1638204	73	2020-08-14	11:02	Clinic	False	False	False	High	High	No	1	6	Independent
	Epimed Monitor	General/Mixed	False	H1654	two	Public	Brazil	AGE2182	13	c928d39f-492c-40d5-906e-d9e59d283955	1638499	88	2020-08-14	14:45	Clinic	False	False	False	Death	Death	No	7	7	Need for assistance	False	False	False	False	False	False	False	False	False		False			False	False	False	False	TRUE	False	False	False	False	False	False	False
	Epimed Monitor	General/Mixed	False	H1654	two	Public	Brazil	AGE2182	13	2bfdae4e-a374-43c4-b969-f75a2d4ddabf	1638461	70	2020-08-17	18:41	Clinic	False	False	False	Death	Death	No	12	15	Independent	False	False	False	False	False	False	False	False	False		False			False	TRUE	False	False	TRUE	False	False	TRUE	False	False	False	False
	Epimed Monitor	General/Mixed	False	H1654	two	Public	Brazil	AGE2182	13	f7ba238c-4e83-4609-b13d-d460bc39f3a3	1638535	71	2020-08-18	11:44	Clinic	False	False	False	High	High	No	2	12	Independent	TRUE	False	False	False	False	False	False	False	False		False			False	False	False	False	TRUE	False	False	TRUE	False	False	False	False
	Epimed Monitor	General/Mixed	False	H1654	two	Public	Brazil	AGE2182	13	2624e68b-d455-49d5-b9ce-f2203e380bf0	1638703	65	2020-08-20	8 o'clock	Clinic	False	False	False	High	High	No	1	4	Independent	False	False	False	False	False	False	False	False	False		False			False	False	False	False	TRUE	False	TRUE	False	False	False	False	False
	Epimed Monitor	General/Mixed	False	H1654	two	Public	Brazil	AGE2182	13	963c341b-7f46-4882-811b-09ceba581d81	1638701	89	2020-08-20	14:00	Clinic	False	False	False	Death	Death	No	7	10	Need for assistance	TRUE	False	False	False	False	False	False	False	False		False			False	False	False	False	TRUE	False	False	False	False	False	False	False
	Epimed Monitor	General/Mixed	False	H1654	two	Public	Brazil	AGE2182	13	1c66440c-0c68-4196-a2a2-29c4f4c957c5	1638204	73	2020-08-21	16:20	Clinic	TRUE	False	False	Death	Death	No	2	2	Independent
	Epimed Monitor	General/Mixed	False	H1654	two	Public	Brazil	AGE2182	13	7760825b-5b46-4aef-834d-c245d1a09c51	533885	86	2020-08-21	16:20	Clinic	False	False	False	Death	Death	No	47	47	Independent	False	False	False	False	False	False	False	False	False		False			False	False	False	False	False	False	False	False	False	False	False	False
	Epimed Monitor	General/Mixed	False	H1654	two	Public	Brazil	AGE2182	13	adff0eaf-cd40-43af-8a93-4999dadeb66a	1639211	71	2020-08-23	14:59	Clinic	False	False	False	Death	Death	No	13	13	Independent	False	False	False	False	False	False	False	False	False		False			False	False	False	False	False	False	False	TRUE	False	False	False	False
	Epimed Monitor	General/Mixed	False	H1654	two	Public	Brazil	AGE2182	13	1bbfa0af-2761-4d3a-bf8e-355d679091df	403717	53	2020-08-25	00:08	Clinic	False	False	False	Death	Death	No	11	11	Independent	False	False	False	False	False	False	False	False	False		False			False	False	False	False	TRUE	False	False	False	False	False	False	False
	Epimed Monitor	General/Mixed	False	H1654	two	Public	Brazil	AGE2182	13	72b18ad5-5bff-4e90-bb28-3df5e41db467	1639319	58	2020-08-26	12:45	Clinic	False	False	False	High	High	No	20	24	Independent	False	False	False	False	False	False	False	False	False		False			False	False	False	False	False	False	False	False	False	False	False	False
	Epimed Monitor	General/Mixed	False	H1654	two	Public	Brazil	AGE2182	13	1a7ef089-9a94-445f-9f4e-53aa590db9ce	1639762	62	2020-08-27	21:30	Clinic	False	False	False	Death	Death	No	16	16	Independent
	Epimed Monitor	General/Mixed	False	H1654	two	Public	Brazil	AGE2182	13	eb70edd3-817c-4713-9917-4f3b1fd248bb	1639645	81	2020-08-28	15:00	Clinic	False	False	False	Death	Death	No	6	8	Independent	TRUE	False	False	False	False	False	False	False	False		False			False	False	False	False	TRUE	False	False	False	False	False	False	False
	Epimed Monitor	General/Mixed	False	H1654	two	Public	Brazil	AGE2182	13	a8af52ee-11bd-4a89-8601-7876cd88d9ac	1639864	93	2020-08-29	14:56	Clinic	False	False	False	Death	Death	No	1	3	Independent	False	False	False	False	False	False	False	False	False		False			False	TRUE	False	False	False	False	False	False	False	False	False	False
	Epimed Monitor	General/Mixed	False	H1654	two	Public	Brazil	AGE2182	13	407e59fc-9141-451f-98fa-550e04d5755f	1639699	74	2020-08-30	16:45	Clinic	False	False	False	Death	Death	No	14	17	Independent	False	False	False	False	False	False	False	False	False		False			False	TRUE	False	False	TRUE	False	False	TRUE	False	False	False	False
	Epimed Monitor	General/Mixed	False	H1654	two	Public	Brazil	AGE2182	13	ccefe4e0-e32a-4dbc-8926-193bbd679198	1639873	81	2020-09-01	08:49	Clinic	False	False	False	High	High	No	34	41	Independent	False	False	TRUE	False	False	False	False	False	False		False			False	False	False	False	False	False	False	False	False	False	False	False
	Epimed Monitor	General/Mixed	False	H1654	two	Public	Brazil	AGE2182	13	1f25a850-e9cd-4648-b9b7-2c366f370ff4	1639470	57	2020-09-01	11:45	Clinic	False	False	False	High	High	No	6	15	Independent	False	False	False	False	False	False	False	False	False		False			False	False	False	False	TRUE	False	False	False	False	False	False	False
	Epimed Monitor	General/Mixed	False	H1654	two	Public	Brazil	AGE2182	13	c6e1a99b-8c07-445a-98ac-d1a296c9fce5	529121	71	2020-09-05	10:49	Clinic	False	False	False	Death	Death	No	19	24	Need for assistance	False	False	False	False	False	False	False	False	False		False			False	False	False	False	TRUE	False	False	False	False	False	False	False
	Epimed Monitor	General/Mixed	False	H1654	two	Public	Brazil	AGE2182	13	91adf3c4-4670-46ff-a5eb-b0a9b9ed9109	1641215	85	2020-09-11	11:22	Clinic	False	False	False	High	High	No	25	34	Independent	False	False	False	False	False	False	False	False	False		False			False	False	False	False	TRUE	False	False	False	False	False	False	False
	Epimed Monitor	General/Mixed	False	H1654	two	Public	Brazil	AGE2182	13	96deae25-7132-4298-bbc7-25116c7605ae	294342	62	2020-09-13	20:30	Clinic	False	False	False	High	High	No	39	48	Independent	False	False	False	False	False	False	False	False	False		False			False	False	False	False	TRUE	False	False	False	False	False	False	False
	Epimed Monitor	General/Mixed	False	H1654	two	Public	Brazil	AGE2182	13	c1343a5a-8146-4a1d-b38c-040b48b8052e	1641692	27	2020-09-15	10:40	Clinic	False	False	False	High	High	No	8	10	Independent	False	False	False	False	False	False	False	False	False		False			False	False	False	False	False	TRUE	False	False	False	False	False	False
	Epimed Monitor	General/Mixed	False	H1654	two	Public	Brazil	AGE2182	13	ed07f3f4-8428-415b-9584-6625de00f8f0	1641690	78	2020-09-15	10:43	Clinic	False	False	False	High	High	No	34	40	Independent	False	False	False	False	False	False	False	False	False		False			False	False	False	False	False	False	False	False	False	False	TRUE	False
	Epimed Monitor	General/Mixed	False	H1654	two	Public	Brazil	AGE2182	13	43c501cc-e700-4b01-9a0e-92b1902ba6b4	1641800	74	2020-09-16	15:45	Clinic	False	False	False	Death	Death	No	10	11	Independent	False	False	False	False	False	False	False	False	False		False			False	False	False	False	TRUE	False	False	False	False	False	False	False
	Epimed Monitor	General/Mixed	False	H1654	two	Public	Brazil	AGE2182	13	d04de70f-f363-4c8c-a779-6aa0bbada22a	1641774	42	2020-09-17	13:40	Clinic	False	False	False	High	High	No	12	18	Independent
	Epimed Monitor	General/Mixed	False	H1654	two	Public	Brazil	AGE2182	13	d8394ee6-da65-41c0-acec-a66e404598b4	1641856	50	2020-09-21	10:27	Clinic	False	False	False	High	High	No	2	9	Independent	False	False	False	False	False	False	False	False	False		False			False	TRUE	False	False	False	False	False	False	False	False	False	False
	Epimed Monitor	General/Mixed	False	H1654	two	Public	Brazil	AGE2182	13	0b631db8-b128-4545-891b-bcb494d82e4f	1642862	52	2020-09-24	16:40	Clinic	False	False	False	High	High	No	28	33	Independent	False	False	False	False	False	False	False	False	False		False			False	False	False	False	TRUE	False	TRUE	False	False	False	False	False
	Epimed Monitor	General/Mixed	False	H1654	two	Public	Brazil	AGE2182	13	c70d57cf-d7a3-4ce4-8fe0-ba8890f66438	414676	49	2020-09-25	15:30	Clinic	False	False	False	High	High	No	4	5	Independent	False	False	False	False	False	False	False	False	False		False			False	False	False	False	TRUE	False	TRUE	False	False	False	False	False
	Epimed Monitor	General/Mixed	False	H1654	two	Public	Brazil	AGE2182	13	911b5f7f-2ec3-4ab7-9795-a8950d1293c2	1642809	60	2020-09-26	16:30	Clinic	False	False	False	High	High	No	5	8	Independent	False	False	False	False	False	False	False	False	False		False			False	TRUE	False	False	TRUE	False	TRUE	False	False	False	False	False
	Epimed Monitor	General/Mixed	False	H1654	two	Public	Brazil	AGE2182	13	dad0499f-08b2-49d0-831a-472d8a3ea77c	09/26/2020	86	2020-09-26	21:30	Clinic	False	False	False	High	High	No	9	13	Independent
	Epimed Monitor	General/Mixed	False	H1654	two	Public	Brazil	AGE2182	13	0b3d0950-6af5-4eb6-8175-77243f8c94c8	192592	67	2020-09-27	13:50	Clinic	False	False	False	Death	Death	No	14	15	Independent	False	False	TRUE	False	False	False	False	False	False		False			False	False	False	False	TRUE	False	False	TRUE	TRUE	TRUE	False	False
	Epimed Monitor	General/Mixed	False	H1654	two	Public	Brazil	AGE2182	13	f78232d8-1d00-4fe0-9676-856bc19a26fe	1643862	55	2020-10-05	12:51	Clinic	False	False	False	Death	Death	No	8	8	Independent	False	False	False	False	False	False	False	False	False		False			False	False	False	False	TRUE	False	TRUE	False	False	False	False	False
	Epimed Monitor	General/Mixed	False	H1654	two	Public	Brazil	AGE2182	13	324b9679-9b68-44b7-bebd-a29bbd52835c	1643795	79	2020-10-06	09:00	Clinic	False	False	False	Death	Death	No	22	25	Independent	False	False	False	False	False	False	False	False	False		False			False	TRUE	False	False	False	False	TRUE	False	False	False	False	False
	Epimed Monitor	General/Mixed	False	H1654	two	Public	Brazil	AGE2182	13	c45fbc21-af84-4535-a7d0-f0ade0e4158e	1644262	73	2020-10-08	14:20	Clinic	False	False	False	High	High	No	11	12	Independent	False	False	False	False	False	False	False	False	False		False			False	False	False	False	TRUE	False	TRUE	False	False	False	False	False
	Epimed Monitor	General/Mixed	False	H1654	two	Public	Brazil	AGE2182	13	4a185ea5-5e4f-47ef-929a-c5e20003dd14	1644352	71	2020-10-09	11:00	Clinic	False	False	False	High	High	No	16	21	Independent	False	False	False	False	False	False	False	False	False		False			False	False	False	False	False	False	TRUE	False	False	False	False	False
	Epimed Monitor	General/Mixed	False	H1654	two	Public	Brazil	AGE2182	13	1f8633b7-058d-4de0-a7bd-fe7a2ac3fc30	563026	90	2020-10-10	11:30	Clinic	False	False	False	Death	Death	No	7	11	Need for assistance	False	False	False	False	False	False	False	False	False		False			False	TRUE	False	False	TRUE	False	False	False	False	False	False	False
	Epimed Monitor	General/Mixed	False	H1654	two	Public	Brazil	AGE2182	13	b9fa09ac-ccd3-43c2-8d25-951da159a0c7	1644694	35	2020-10-15	11:56	Clinic	False	False	False	High	High	No	6	11	Need for assistance	False	False	False	False	False	False	False	False	False		False			False	False	False	False	False	False	TRUE	False	False	False	False	False
	Epimed Monitor	General/Mixed	False	H1654	two	Public	Brazil	AGE2182	13	c0315818-5045-4743-919c-b80705f72bb8	1644957	42	2020-10-18	15:00	Clinic	False	False	False	High	High	No	36	41	Independent	False	False	False	False	False	False	False	False	False		False			False	False	False	False	False	False	False	False	False	False	False	False
	Epimed Monitor	General/Mixed	False	H1654	two	Public	Brazil	AGE2182	13	4279183e-ba3a-41c7-ad22-01e343d7c8eb	814113	62	2020-10-19	21:00	Clinic	False	False	False	Death	Death	No	1	9	Restricted/bed-bound	False	False	False	False	False	False	False	False	False		False			False	False	False	False	TRUE	False	TRUE	False	False	False	False	False
	Epimed Monitor	General/Mixed	False	H1654	two	Public	Brazil	AGE2182	13	4279183e-ba3a-41c7-ad22-01e343d7c8eb	814113	62	2020-10-19	22:00	Clinic	False	False	False	Death	Death	No	1	9	Independent	False	False	False	False	False	False	False	False	False		False			False	False	False	False	TRUE	False	TRUE	False	False	False	False	False
	Epimed Monitor	General/Mixed	False	H1654	two	Public	Brazil	AGE2182	13	af480826-dfe5-41a1-8a5f-bfe3e0c54cc7	742180	68	2020-10-21	16:20	Clinic	False	False	False	High	High	No	15	35	Need for assistance	False	False	False	False	False	False	False	False	False		False			False	False	False	False	TRUE	False	TRUE	False	False	False	False	False
	Epimed Monitor	General/Mixed	False	H1654	two	Public	Brazil	AGE2182	13	892a622c-5988-4fe0-a0b3-c27508fddf9a	402621	77	2020-10-22	02:07	Clinic	False	False	False	Death	Death	No	12	13	Independent	TRUE	False	False	False	False	False	False	False	False		False			False	False	False	False	TRUE	False	TRUE	False	False	False	False	False
	Epimed Monitor	General/Mixed	False	H1654	two	Public	Brazil	AGE2182	13	c14347bd-4b61-4457-92d3-4e4902461368	1645538	88	2020-10-24	18:17	Clinic	False	False	False	Death	Death	No	16	16	Need for assistance
	Epimed Monitor	General/Mixed	False	H1654	two	Public	Brazil	AGE2182	13	bf25cc34-0516-4ee0-808a-fa0f3f0d40ee	1645520	59	2020-10-25	4:00 pm	Clinic	False	False	False	High	High	No	2	7	Independent
	Epimed Monitor	General/Mixed	False	H1654	two	Public	Brazil	AGE2182	13	8ce0bb1e-ec31-4ac5-b10d-7d6502859f49	1645496	61	2020-10-27	10:46	Clinic	False	False	False	Death	Death	No	9	13	Independent
	Epimed Monitor	General/Mixed	False	H1654	two	Public	Brazil	AGE2182	13	31b521c3-7e14-4cce-9302-66033cb4f57a	1645386	77	2020-10-28	11:24	Clinic	False	False	False	High	High	No	13	50	Independent	False	False	False	False	False	False	False	False	False		False			False	False	False	False	TRUE	False	TRUE	False	False	False	False	False
	Epimed Monitor	General/Mixed	False	H1654	two	Public	Brazil	AGE2182	13	dc5604e4-2c8f-4c9c-901a-59b5c1ec07e6	1645542	79	2020-10-28	15:30	Clinic	False	False	False	Death	Death	No	12	16	Restricted/bed-bound	False	False	False	False	False	False	False	False	False		False			False	False	False	False	TRUE	False	False	False	False	False	False	False
	Epimed Monitor	General/Mixed	False	H1654	two	Public	Brazil	AGE2182	13	62f39464-0f06-4c7a-a3c7-63f2a527e5a5	1645403	73	2020-10-28	21:00	Clinic	False	False	False	Death	Death	No	13	19	Restricted/bed-bound	False	False	False	False	False	False	False	False	False		False			False	False	False	False	TRUE	False	TRUE	False	False	False	False	False
	Epimed Monitor	General/Mixed	False	H1654	two	Public	Brazil	AGE2182	13	6f0fa0f9-6505-4474-945c-61bfd6f77a88	1096881	65	2020-10-29	15:00	Clinic	False	False	False	Death	Death	No	18	20	Independent
	Epimed Monitor	General/Mixed	False	H1654	two	Public	Brazil	AGE2182	13	b615203d-360b-47f8-97bb-497692e27ef5	1646330	72	2020-11-05	09:30	Clinic	False	False	False	Death	Death	No	19	20	Independent	False	False	False	False	False	False	False	False	False		False			False	False	False	False	TRUE	False	False	False	False	False	False	False
	Epimed Monitor	General/Mixed	False	H1654	two	Public	Brazil	AGE2182	13	a5aad0f7-94dd-407a-872b-44988e0eab0c	467047	77	2020-11-05	15:20	Clinic	False	False	False	Death	Death	No	4	4	Need for assistance	False	False	False	False	False	False	False	False	False		False			False	False	False	False	False	False	TRUE	False	False	False	False	False
	Epimed Monitor	General/Mixed	False	H1654	two	Public	Brazil	AGE2182	13	1b7d70ae-f77b-45b5-99cd-d2c793731abd	1646472	85	2020-11-09	11:10	Clinic	False	False	False	Death	Death	No	7	11	Independent	False	False	False	False	False	False	False	False	False		False			False	False	False	False	TRUE	False	TRUE	False	False	False	False	False
	Epimed Monitor	General/Mixed	False	H1654	two	Public	Brazil	AGE2182	13	dfabea8c-3d01-41aa-b529-29cc13b93256	1646716	86	2020-11-10	12:00 pm	Clinic	False	False	False	High	High	No	8	15	Need for assistance	False	False	TRUE	False	False	False	False	False	False		False			False	False	False	False	TRUE	False	TRUE	False	False	False	False	False
	Epimed Monitor	General/Mixed	False	H1654	two	Public	Brazil	AGE2182	13	df5a7629-c20c-4057-89fb-709e6834f345	1646473	70	2020-11-10	12:15	Clinic	False	False	False	Death	Death	No	10	15	Independent	False	False	False	False	False	False	False	False	False		False			False	False	False	False	TRUE	False	False	False	False	False	False	False
	Epimed Monitor	General/Mixed	False	H1654	two	Public	Brazil	AGE2182	13	f7d5be8f-71b8-4323-991f-eb246ea0aa16	2665612	66	2020-11-11	00:43	Clinic	False	False	False	Death	Death	No	14	14	Independent	False	False	False	False	False	False	False	False	False		False			False	False	False	False	TRUE	False	TRUE	False	False	False	False	False
	Epimed Monitor	General/Mixed	False	H1654	two	Public	Brazil	AGE2182	13	cfd5f5cc-bdf5-4242-a7c2-57cf7d4e7d01	889,377	79	2020-11-13	21:00	Clinic	False	False	False	Death	Death	No	18	18	Independent	False	False	False	False	False	False	False	False	False		False			False	False	False	False	TRUE	False	False	False	False	False	False	False
	Epimed Monitor	General/Mixed	False	H1654	two	Public	Brazil	AGE2182	13	321d0707-2fb6-44e5-91a9-cab4dae4452d	1647068	51	2020-11-14	18:30	Clinic	False	False	False	High	High	No	8	12	Independent	False	False	False	False	False	False	False	False	False		False			False	False	False	False	TRUE	False	TRUE	False	False	False	False	False
	Epimed Monitor	General/Mixed	False	H1654	two	Public	Brazil	AGE2182	13	1e9d9f6a-ef1a-48c1-b54b-3d5280ff5d66	1647650	74	2020-11-20	13:09	Clinic	False	False	False	High	High	No	6	19	Independent	False	False	False	False	False	False	False	False	False		False			False	False	False	False	TRUE	False	TRUE	False	False	False	False	False
	Epimed Monitor	General/Mixed	False	H1654	two	Public	Brazil	AGE2182	13	6e8c562c-df24-4ab3-bbb0-9cb88b0047de	1647725	39	2020-11-21	11:40	Clinic	False	False	False	High	High	No	2	4	Independent
	Epimed Monitor	General/Mixed	False	H1654	two	Public	Brazil	AGE2182	13	09c62200-1c23-4403-95d1-657e14129e76	1647328	46	2020-11-22	21:30	Clinic	False	False	False	Death	Death	No	2	7	Independent	False	False	False	False	False	False	False	False	False		False			False	False	False	False	False	False	False	False	False	False	False	False
	Epimed Monitor	General/Mixed	False	H1654	two	Public	Brazil	AGE2182	13	c8152422-bd1b-4ea2-a782-dbcc79361011	1647714	62	2020-11-23	12:00 pm	Clinic	False	False	False	Death	Death	No	14	16	Independent	TRUE	False	False	False	False	False	False	False	False		False			False	False	False	False	TRUE	False	TRUE	False	False	False	False	False
	Epimed Monitor	General/Mixed	False	H1654	two	Public	Brazil	AGE2182	13	0ac71e1a-d574-4a71-bd66-b230b2957f3e	103933	83	2020-11-23	20:30	Clinic	False	False	False	High	Death	No	1	16	Need for assistance	TRUE	False	TRUE	False	False	False	False	False	False		False			False	False	False	False	TRUE	False	False	TRUE	False	False	False	False
	Epimed Monitor	General/Mixed	False	H1654	two	Public	Brazil	AGE2182	13	0ac71e1a-d574-4a71-bd66-b230b2957f3e	103933	83	2020-11-23	20:30	Clinic	TRUE	TRUE	TRUE	Death	Death	No	16	16	Need for assistance	TRUE	False	TRUE	False	False	False	False	False	False		False			False	False	False	False	TRUE	False	False	TRUE	False	False	False	False
	Epimed Monitor	General/Mixed	False	H1654	two	Public	Brazil	AGE2182	13	609070cd-e104-4672-b27a-90556c549ee0	1647733	76	2020-11-24	12:00 pm	Clinic	False	False	False	Death	Death	No	9	9	Independent	False	False	False	False	False	False	False	False	False		False			False	False	False	False	TRUE	False	False	TRUE	False	False	False	False
	Epimed Monitor	General/Mixed	False	H1654	two	Public	Brazil	AGE2182	13	e9dfef99-d86d-44b3-93f3-b2f1b269897c	150308	82	2020-11-24	15:30	Clinic	False	False	False	High	Death	No	10	13	Independent	False	False	False	False	False	False	False	False	False		False			False	False	False	False	TRUE	False	False	False	False	False	False	False
	Epimed Monitor	General/Mixed	False	H1654	two	Public	Brazil	AGE2182	13	95b27381-37f4-4dc1-9f95-667d9fc813f7	1647982	79	2020-11-24	21:41	Clinic	False	False	False	Death	Death	No	5	5	Independent	False	False	False	False	False	False	False	False	False		False			False	False	False	False	False	False	False	False	False	False	False	False
	Epimed Monitor	General/Mixed	False	H1654	two	Public	Brazil	AGE2182	13	3c0219b1-419a-4258-be51-be077a2b9b0f	1647876	39	2020-11-25	09:36	Clinic	False	False	False	Death	Death	No	4	6	Independent
	Epimed Monitor	General/Mixed	False	H1654	two	Public	Brazil	AGE2182	13	d83dc464-9a85-48ee-83ab-1d9e5a3b726a	1647865	56	2020-11-25	14:57	Clinic	False	False	False	Death	Death	No	25	27	Independent	False	False	False	False	False	False	False	False	False		False			False	False	False	False	TRUE	False	False	False	False	False	False	False
	Epimed Monitor	General/Mixed	False	H1654	two	Public	Brazil	AGE2182	13	f629527c-8e99-439e-8082-42a843c3f6b7	1648112	63	2020-11-25	17:30	Clinic	False	False	False	Death	Death	No	13	13	Independent	False	False	False	False	False	False	False	False	False		False			False	TRUE	False	False	TRUE	False	TRUE	False	False	False	False	False
	Epimed Monitor	General/Mixed	False	H1654	two	Public	Brazil	AGE2182	13	b97ae648-4ade-4c2a-b8c4-3bb3467cbaed	911823	27	2020-11-26	23:55	Clinic	False	False	False	High	High	No	4	7	Independent	False	False	False	False	False	False	False	False	False		False			False	False	False	False	False	False	False	TRUE	False	False	False	False
	Epimed Monitor	General/Mixed	False	H1654	two	Public	Brazil	AGE2182	13	dceae78a-ffee-4d97-bc63-14aede1da936	1648413	81	2020-11-30	11:00	Clinic	False	False	False	Death	Death	No	3	3	Independent	False	False	TRUE	False	False	False	False	False	False		False			False	False	False	False	False	False	False	False	False	False	False	False
	Epimed Monitor	General/Mixed	False	H1654	two	Public	Brazil	AGE2182	13	c9196fa9-a667-4909-bb4b-7f71b90286c0	1648480	57	2020-11-30	15:47	Clinic	False	False	False	Death	Death	No	14	14	Independent	TRUE	False	False	False	False	False	False	False	False		False			False	False	False	False	False	False	False	False	False	TRUE	False	False
	Epimed Monitor	General/Mixed	False	H1654	two	Public	Brazil	AGE2182	13	6c5f9aa2-6289-4a62-8b1c-547355f87f56	1648486	63	2020-12-01	11:00	Clinic	False	False	False	Death	Death	No	18	19	Independent	False	False	False	False	False	False	False	False	False		False			False	False	False	False	False	False	False	False	False	False	False	False
	Epimed Monitor	General/Mixed	False	H1654	two	Public	Brazil	AGE2182	13	3255f888-94bb-423e-bfba-54bb4fb88a42	1648361	67	2020-12-02	13:15	Clinic	False	False	False	Death	Death	No	12	15	Independent	False	False	False	False	False	False	False	False	False		False			False	False	False	False	TRUE	False	False	False	False	False	False	False
	Epimed Monitor	General/Mixed	False	H1654	two	Public	Brazil	AGE2182	13	9004e813-2932-404d-8f51-ce1ef94a321c	1648587	48	2020-12-04	11:28	Clinic	False	False	False	High	High	No	40	51	Independent	False	False	False	False	False	False	False	False	False		False			False	False	False	False	TRUE	False	False	False	False	False	False	False
	Epimed Monitor	General/Mixed	False	H1654	two	Public	Brazil	AGE2182	13	a05b5127-0bd7-482c-b8ad-1b5021d84055	1648327	48	2020-12-04	13:33	Clinic	False	False	False	Death	Death	No	8	15	Independent	False	False	False	False	False	False	False	False	False		False			False	False	False	False	TRUE	False	False	False	False	False	False	False
	Epimed Monitor	General/Mixed	False	H1654	two	Public	Brazil	AGE2182	13	f2c75ca1-d8dd-4d12-9474-9989a3a20e83	1648859	64	2020-12-04	23:00	Clinic	False	False	False	Death	Death	No	10	10	Independent	False	False	False	False	False	False	False	False	False		False			False	False	False	False	TRUE	False	TRUE	False	False	False	False	False
	Epimed Monitor	General/Mixed	False	H1654	two	Public	Brazil	AGE2182	13	26197bfe-5226-44f4-8b7c-f820f7fa6df2	1649035	57	2020-12-08	10:30	Clinic	False	False	False	High	High	No	23	36	Independent	TRUE	False	False	False	False	False	False	False	False		False			False	TRUE	False	False	False	False	False	False	False	False	False	False
	Epimed Monitor	General/Mixed	False	H1654	two	Public	Brazil	AGE2182	13	c84d75e6-f06d-47dc-bea7-b02a86703cb3	1648856	64	2020-12-08	12:01	Clinic	False	False	False	High	Death	No	1	23	Independent	TRUE	False	False	False	False	False	False	False	False		False			False	False	False	False	TRUE	False	False	False	False	False	False	False
	Epimed Monitor	General/Mixed	False	H1654	two	Public	Brazil	AGE2182	13	ef106eb5-708c-411d-ae9a-30b214a38261	1648919	53	2020-12-08	14:00	Clinic	False	False	False	High	High	No	28	36	Independent	False	False	False	False	False	False	False	False	False		False			False	False	False	False	TRUE	False	TRUE	False	False	False	False	False
	Epimed Monitor	General/Mixed	False	H1654	two	Public	Brazil	AGE2182	13	8659d103-2b75-4ef8-95d3-d672f771f31c	1649122	57	2020-12-08	15:30	Clinic	False	False	False	Death	Death	No	6	6	Independent	False	False	False	False	False	False	False	TRUE	False	Uterus	False			False	False	False	False	TRUE	False	False	False	False	False	False	False
	Epimed Monitor	General/Mixed	False	H1654	two	Public	Brazil	AGE2182	13	6fed0fb4-5227-44dd-873e-1e3a6829df00	1648856	82	2020-12-11	23:02	Clinic	TRUE	False	False	Death	Death	No	16	23	Independent
	Epimed Monitor	General/Mixed	False	H1654	two	Public	Brazil	AGE2182	13	3713d6d4-4db1-4324-a42d-4a77cc9254b5	454179	53	2020-12-12	23:30	Clinic	False	False	False	Death	Death	No	25	28	Independent
	Epimed Monitor	General/Mixed	False	H1654	two	Public	Brazil	AGE2182	13	fdfc49d5-196f-4c42-b744-8ae2f6c76ed7	1649447	58	2020-12-13	08:06	Clinic	False	False	False	Death	Death	No	7	8	Independent	False	False	False	False	False	False	False	False	False		False			False	False	False	False	TRUE	False	TRUE	False	False	False	False	False
	Epimed Monitor	General/Mixed	False	H1654	two	Public	Brazil	AGE2182	13	cbb2ef2c-4077-40aa-b5f5-0ad508b57839	1649549	25	2020-12-14	18:00	Clinic	False	False	False	High	High	No	25	29	Independent	False	False	False	False	False	False	False	False	False		False			False	False	False	False	False	TRUE	False	False	False	False	False	False
	Epimed Monitor	General/Mixed	False	H1654	two	Public	Brazil	AGE2182	13	5a4822cb-2fe1-4e13-8d14-36080618ae86	1649560	60	2020-12-14	22:55	Clinic	False	False	False	Death	Death	No	41	41	Independent	False	False	False	False	False	False	False	False	False		False			False	False	False	False	TRUE	False	TRUE	False	False	False	False	False
	Epimed Monitor	General/Mixed	False	H1654	two	Public	Brazil	AGE2182	13	afeac966-d251-4c47-81de-190d7818f0a2	141418	65	2020-12-15	09:00	Clinic	False	False	False	Death	Death	No	21	25	Independent	False	False	False	False	False	False	False	False	False		False			False	False	False	False	TRUE	False	False	False	False	False	False	False
	Epimed Monitor	General/Mixed	False	H1654	two	Public	Brazil	AGE2182	13	5a679c7a-2435-4581-b724-f502729a46a2	1102660	79	2020-12-16	00:25	Clinic	False	False	False	Death	Death	No	7	7	Independent	False	False	False	False	False	False	False	False	False		False			False	False	False	False	TRUE	False	TRUE	False	False	False	False	False
	Epimed Monitor	General/Mixed	False	H1654	two	Public	Brazil	AGE2182	13	36eb0cd9-2536-4592-aa01-41c61a70fdca	1649775	69	2020-12-16	12:06	Clinic	False	False	False	Death	Death	No	11	11	Independent	False	False	False	False	False	False	False	False	False		TRUE	2	Leukemia	False	False	False	False	False	False	False	False	False	False	False	False
	Epimed Monitor	General/Mixed	False	H1654	two	Public	Brazil	AGE2182	13	2005dc50-5e94-4704-bcce-e32b6275d0ad	1649677	26	2020-12-17	13:30	Clinic	False	False	False	High	High	No	17	21	Independent	False	False	False	False	False	False	False	False	False		False			False	False	False	False	False	False	False	False	False	False	False	False
	Epimed Monitor	General/Mixed	False	H1654	two	Public	Brazil	AGE2182	13	f15f90b5-1f22-49d1-bee1-88ce10441e48	1649853	74	2020-12-19	13:19	Clinic	False	False	False	Death	Death	No	16	18	Independent	False	False	False	False	False	False	False	False	False		False			False	False	False	False	TRUE	False	False	False	False	False	False	False
	Epimed Monitor	General/Mixed	False	H1654	two	Public	Brazil	AGE2182	13	cab672d9-b9e8-48c3-a153-7a6dcbdd55c0	486636	71	2020-12-22	20:35	Clinic	False	False	False	Death	Death	No	8	8	Independent	TRUE	False	False	False	False	False	False	TRUE	False	Large intestine/anal canal	False			False	False	False	False	TRUE	False	False	False	False	False	False	False
	Epimed Monitor	General/Mixed	False	H1654	two	Public	Brazil	AGE2182	13	3dafd668-3284-45ad-90a7-566b0a6b9c6b	1650355	56	2020-12-23	23:00	Clinic	False	False	False	Death	Death	No	29	29	Independent	False	False	False	False	False	False	False	False	False		False			False	False	False	False	TRUE	False	TRUE	False	False	False	False	False
	Epimed Monitor	General/Mixed	False	H1654	two	Public	Brazil	AGE2182	13	c02b4847-dc5c-47d0-a246-dc4c8849a3b8	1650809	48	2021-01-02	17:00	Clinic	False	False	False	High	High	No	4	10	Independent	False	False	False	False	False	False	False	False	False		False			False	False	False	False	TRUE	False	False	False	False	False	False	False
	Epimed Monitor	General/Mixed	False	H1654	two	Public	Brazil	AGE2182	13	d4c9e005-8199-4274-8b36-518ba76341a1	1650848	90	2021-01-03	18:11	Clinic	False	False	False	Death	Death	No	7	7	Independent	False	False	False	False	False	False	False	False	False		False			False	False	False	False	TRUE	False	False	False	False	False	False	False
	Epimed Monitor	General/Mixed	False	H1654	two	Public	Brazil	AGE2182	13	0ffed6bd-16cc-4c16-bf34-b223890d2ba6	1651229	69	2021-01-06	19:00	Clinic	False	False	False	Death	Death	No	5	5	Independent	TRUE	False	TRUE	False	False	False	False	False	False		False			False	False	False	False	TRUE	False	False	TRUE	False	False	False	False
	Epimed Monitor	General/Mixed	False	H1654	two	Public	Brazil	AGE2182	13	b3a0b9b1-b4f3-4a20-876a-ee2065045d3b	438893	79	2021-01-07	02:43	Clinic	False	False	False	Death	Death	No	6	6	Independent	False	False	TRUE	False	False	False	False	False	False		False			False	False	False	False	TRUE	False	False	False	False	False	False	False
	Epimed Monitor	General/Mixed	False	H1654	two	Public	Brazil	AGE2182	13	facca21a-f6d7-4f16-b82b-e63e3d05a5ad	1651475	71	2021-01-08	20:56	Clinic	False	False	False	Death	Death	No	14	14	Independent	False	False	False	False	False	False	False	False	False		False			False	False	False	False	TRUE	False	TRUE	False	False	False	False	False
	Epimed Monitor	General/Mixed	False	H1654	two	Public	Brazil	AGE2182	13	c9a63b2d-721d-48d8-b344-d380c469d169	1651628	58	2021-01-11	18:20	Clinic	False	False	False	High	High	No	3	5	Independent	False	False	False	False	False	False	False	False	False		False			False	False	False	False	TRUE	False	TRUE	False	False	False	False	False
	Epimed Monitor	General/Mixed	False	H1654	two	Public	Brazil	AGE2182	13	ac389be9-a1ed-42c6-afed-15396b8856f3	1651636	77	2021-01-12	01:00	Clinic	False	False	False	Death	Death	No	13	13	Independent	False	False	False	False	False	False	False	False	False		False			False	False	False	False	TRUE	False	False	False	False	False	False	False
	Epimed Monitor	General/Mixed	False	H1654	two	Public	Brazil	AGE2182	13	911824cd-3dfa-4c81-890e-dba7c095f66f	1651205	80	2021-01-13	11:20	Clinic	False	False	False	Death	Death	No	3	10	Independent	False	False	False	False	False	False	False	False	False		False			False	False	False	False	TRUE	False	False	False	False	False	False	False
	Epimed Monitor	General/Mixed	False	H1654	two	Public	Brazil	AGE2182	13	ef7a15fc-e9ff-4835-98c8-6295d0e6fb3d	1651850	37	2021-01-13	18:00	Clinic	False	False	False	Death	Death	No	17	17	Independent	False	False	False	False	False	False	False	False	False		False			False	False	False	False	TRUE	False	False	False	False	False	False	False
	Epimed Monitor	General/Mixed	False	H1654	two	Public	Brazil	AGE2182	13	4d8bd41f-1b74-40a5-a8a9-255c751e2289	1651512	64	2021-01-15	10:00 am	Clinic	False	False	False	Death	Death	No	16	21	Independent	False	False	False	False	False	False	False	False	False		False			False	TRUE	False	False	False	False	False	False	False	False	False	False
	Epimed Monitor	General/Mixed	False	H1654	two	Public	Brazil	AGE2182	13	f4c6a19a-0707-4eca-aded-92974b50d066	1652030	47	2021-01-15	14:20	Clinic	False	False	False	High	High	No	28	41	Independent	False	False	False	False	False	False	False	False	False		False			False	False	False	False	TRUE	False	False	False	False	False	False	False
	Epimed Monitor	General/Mixed	False	H1654	two	Public	Brazil	AGE2182	13	76494abe-52be-4134-8b98-6babf93d86c9	1652052	58	2021-01-15	18:30	Clinic	False	False	False	Death	Death	No	19	19	Independent	False	False	False	False	False	False	False	False	False		False			False	False	False	False	TRUE	False	False	False	False	False	False	False
	Epimed Monitor	General/Mixed	False	H1654	two	Public	Brazil	AGE2182	13	18b8bf24-f1e9-4001-9387-15f976f8cc62	1652095	72	2021-01-18	10:00 am	Clinic	False	False	False	Death	Death	No	12	13	Independent
	Epimed Monitor	General/Mixed	False	H1654	two	Public	Brazil	AGE2182	13	a946e71d-2101-4787-9ebc-ebf9540e4cdd	1652219	64	2021-01-18	19:30	Clinic	False	False	False	Death	Death	No	5	5	Independent	False	False	False	TRUE	False	False	False	False	False		False			False	False	False	False	False	False	False	False	False	False	False	False
	Epimed Monitor	General/Mixed	False	H1654	two	Public	Brazil	AGE2182	13	074c0fab-3958-47f6-b735-e54f2fded612	1652320	66	2021-01-19	18:00	Clinic	False	False	False	Death	Death	No	11	11	Independent	False	False	False	False	False	False	False	False	False		False			False	False	False	False	TRUE	False	False	False	False	False	False	False
	Epimed Monitor	General/Mixed	False	H1654	two	Public	Brazil	AGE2182	13	6bad7129-3f75-45ee-a778-107a8a6b5d94	1652586	80	2021-01-22	18:30	Clinic	False	False	False	Death	Death	No	11	12	Need for assistance	False	False	False	False	False	False	False	False	False		False			False	False	False	False	TRUE	False	False	False	False	False	False	False
	Epimed Monitor	General/Mixed	False	H1654	two	Public	Brazil	AGE2182	13	75fe4603-3168-40e8-b028-3054a3ce5b6a	1652689	61	2021-01-23	11:10	Clinic	False	False	False	Death	Death	No	13	14	Independent	False	False	False	False	False	False	False	False	False		False			False	False	False	False	TRUE	False	False	TRUE	False	False	False	False
	Epimed Monitor	General/Mixed	False	H1654	two	Public	Brazil	AGE2182	13	c542825f-3af2-41cf-b2d2-005acf372a19	1652721	67	2021-01-25	08:30	Clinic	False	False	False	High	High	No	38	44	Independent	False	False	False	False	False	False	False	False	False		False			False	TRUE	False	False	TRUE	False	TRUE	False	False	False	False	False
	Epimed Monitor	General/Mixed	False	H1654	two	Public	Brazil	AGE2182	13	69560bf5-6a35-4bc5-8d31-900a7a6a8128	333515	69	2021-01-26	23:00	Clinic	False	False	False	Death	Death	No	12	19	Need for assistance	False	False	False	False	False	False	False	False	False		False			False	False	False	False	TRUE	False	TRUE	False	False	False	False	False
	Epimed Monitor	General/Mixed	False	H1654	two	Public	Brazil	AGE2182	13	911af655-0df1-465e-a2d7-da264a01f530	1652821	58	2021-01-28	17:00	Clinic	False	False	False	Death	Death	No	18	21	Independent	False	False	False	False	False	False	False	False	False		False			False	False	False	False	TRUE	False	False	False	False	False	False	False
	Epimed Monitor	General/Mixed	False	H1654	two	Public	Brazil	AGE2182	13	d5b076b6-149d-47f3-b1f0-3658334a8ffe	1653109	72	2021-01-30	16:16	Clinic	False	False	False	Death	Death	No	4	6	Independent	False	False	False	False	False	False	False	False	False		False			False	False	False	False	TRUE	False	False	False	False	False	False	False
	Epimed Monitor	General/Mixed	False	H1654	two	Public	Brazil	AGE2182	13	660dde18-e47a-46ad-aa61-5f20ff1c3506	1653401	58	2021-02-01	19:30	Clinic	False	False	False	High	High	No	16	27	Independent	False	False	False	False	False	False	False	False	False		False			False	False	False	False	False	False	False	False	False	False	False	False
	Epimed Monitor	General/Mixed	False	H1654	two	Public	Brazil	AGE2182	13	3abe76ec-a9cb-4197-bc9c-d63f8b9b84f1	1001451	64	2021-02-04	11:30	Clinic	False	False	False	Death	Death	No	6	12	Independent	False	False	False	False	False	False	False	False	False		False			False	False	False	False	TRUE	False	False	TRUE	False	False	False	False
	Epimed Monitor	General/Mixed	False	H1654	two	Public	Brazil	AGE2182	13	6365ec3a-bc7f-4750-a203-543307ff9a2f	1653457	46	2021-02-05	12:58	Clinic	False	False	False	High	Death	No	12	30	Independent
	Epimed Monitor	General/Mixed	False	H1654	two	Public	Brazil	AGE2182	13	8fead10c-104c-4f23-b6e3-ad382b1b1199	1653978	55	2021-02-07	15:20	Clinic	False	False	False	Death	Death	No	6	6	Independent	False	False	False	False	False	False	False	False	False		False			False	False	False	False	False	False	False	False	False	False	False	False
	Epimed Monitor	General/Mixed	False	H1654	two	Public	Brazil	AGE2182	13	9f20159a-dc6c-4735-9364-3c7ecbfed965	1653986	86	2021-02-07	18:20	Clinic	False	False	False	High	High	No	2	5	Independent	False	False	False	False	False	False	False	False	False		False			False	False	False	False	TRUE	False	TRUE	False	False	False	False	False
	Epimed Monitor	General/Mixed	False	H1654	two	Public	Brazil	AGE2182	13	2da33bfe-7b0f-40cf-9642-624dfd4cdc57	1653994	38	2021-02-07	22:59	Clinic	False	False	False	Death	Death	No	7	7	Independent	False	False	False	False	False	False	False	False	False		False			False	False	False	False	False	False	TRUE	False	False	False	False	False
	Epimed Monitor	General/Mixed	False	H1654	two	Public	Brazil	AGE2182	13	e5432535-97fe-477b-bc48-c6275a4e798a	1654249	59	2021-02-09	22:00	Clinic	False	False	False	Death	Death	No	8	8	Independent	False	False	False	False	False	False	False	False	False		False			False	False	False	False	TRUE	False	False	False	False	False	False	False
	Epimed Monitor	General/Mixed	False	H1654	two	Public	Brazil	AGE2182	13	7d272dc1-359e-40c0-b6e8-4eb0d164f946	1654128	39	2021-02-10	12:00 pm	Clinic	False	False	False	Death	Death	No	19	21	Independent	False	False	False	False	False	False	False	False	False		False			False	False	False	False	False	False	TRUE	False	False	False	False	False
	Epimed Monitor	General/Mixed	False	H1654	two	Public	Brazil	AGE2182	13	30aaedab-a1b5-4f76-95b5-2ec623930762	1654410	73	2021-02-10	22:00	Clinic	False	False	False	High	High	No	5	20	Independent	False	False	False	False	False	False	False	False	False		False			False	False	False	False	TRUE	False	TRUE	False	False	False	False	False
	Epimed Monitor	General/Mixed	False	H1654	two	Public	Brazil	AGE2182	13	6fd65ee4-0c89-4e22-957c-513cb7c1d161	1654721	45	2021-02-12	21:00	Clinic	False	False	False	Death	Death	No	14	14	Independent
	Epimed Monitor	General/Mixed	False	H1654	two	Public	Brazil	AGE2182	13	9dcd2059-fb48-4d57-ba23-16a79808eb33	1654751	44	2021-02-14	16:06	Clinic	False	False	False	High	High	No	7	9	Independent
	Epimed Monitor	General/Mixed	False	H1654	two	Public	Brazil	AGE2182	13	d94c7161-41ea-49a9-9aa1-7b05f5a86768	1654814	80	2021-02-15	13:00	Clinic	False	False	False	Death	Death	No	4	4	Independent	False	False	False	False	False	False	False	False	False		False			False	False	False	False	TRUE	False	False	False	False	False	False	False
	Epimed Monitor	General/Mixed	False	H1654	two	Public	Brazil	AGE2182	13	132ae3a2-910a-473d-955c-15a0bd657ad1	10441	72	2021-02-15	22:00	Clinic	False	False	False	Death	Death	No	26	26	Independent	TRUE	False	False	False	False	False	False	False	False		False			False	False	False	False	TRUE	False	False	False	False	False	False	False
	Epimed Monitor	General/Mixed	False	H1654	two	Public	Brazil	AGE2182	13	30aaedab-a1b5-4f76-95b5-2ec623930762	1654410	73	2021-02-16	11:20	Clinic	TRUE	TRUE	TRUE	High	High	No	14	20	Independent	False	False	False	False	False	False	False	False	False		False			False	False	False	False	TRUE	False	TRUE	False	False	False	False	False
	Epimed Monitor	General/Mixed	False	H1654	two	Public	Brazil	AGE2182	13	33f9e4b3-0918-47ff-b570-19d701d3ac49	32166	23	2021-02-17	19:13	Clinic	False	False	False	Death	Death	No	5	8	Independent	False	False	False	False	False	False	False	False	False		False			False	False	False	False	False	False	False	False	False	False	False	False
	Epimed Monitor	General/Mixed	False	H1654	two	Public	Brazil	AGE2182	13	744c22c2-ebb1-4998-ae14-ca07c8d6aa2b	1655303	55	2021-02-19	14:30	Clinic	False	False	False	Death	Death	No	6	7	Independent	False	False	False	False	False	False	False	False	False		False			False	False	False	False	TRUE	False	False	False	False	False	False	False
	Epimed Monitor	General/Mixed	False	H1654	two	Public	Brazil	AGE2182	13	aac27a13-ba9f-443e-8140-c61ba6546017	1655530	80	2021-02-20	15:07	Clinic	False	False	False	Death	Death	No	7	7	Independent	False	False	False	False	False	False	False	False	False		False			False	False	False	False	TRUE	False	TRUE	False	False	False	False	False
	Epimed Monitor	General/Mixed	False	H1654	two	Public	Brazil	AGE2182	13	9cc46131-661a-4314-8671-f49e1d3344e0	264871	48	2021-02-21	10:05	Clinic	False	False	False	High	Death	No	19	27	Independent	TRUE	False	False	False	False	False	False	False	False		False			False	False	False	False	TRUE	False	False	False	False	False	TRUE	False
	Epimed Monitor	General/Mixed	False	H1654	two	Public	Brazil	AGE2182	13	d5400236-a447-4c04-8863-07ab9bdba63f	1110423	46	2021-02-21	11:00	Clinic	False	False	False	Death	Death	No	29	29	Independent
	Epimed Monitor	General/Mixed	False	H1654	two	Public	Brazil	AGE2182	13	50d68562-2879-4a97-a999-cb68d0403552	92342	43	2021-02-26	00:15	Clinic	False	False	False	Death	Death	No	16	16	Independent	False	False	False	False	False	False	False	False	False		False			False	False	False	False	False	False	False	False	False	False	False	False
	Epimed Monitor	General/Mixed	False	H1654	two	Public	Brazil	AGE2182	13	88e40869-e774-4f7a-a629-2985bc4edd91	1656275	47	2021-02-26	16:44	Clinic	False	False	False	Death	Death	No	4	4	Independent
	Epimed Monitor	General/Mixed	False	H1654	two	Public	Brazil	AGE2182	13	586a0f4c-875c-4862-b6f9-8dae7e650408	72931	54	2021-02-26	22:30	Clinic	False	False	False	Death	Death	No	18	18	Independent	False	False	False	False	False	False	False	False	False		False			False	False	False	False	TRUE	False	False	False	False	False	False	False
	Epimed Monitor	General/Mixed	False	H1654	two	Public	Brazil	AGE2182	13	53db81b7-c54f-4c4d-9753-706a0c4e4074	1656309	68	2021-02-27	18:00	Clinic	False	False	False	Death	Death	No	2	2	Independent	False	False	False	False	False	False	False	False	False		False			False	False	False	False	TRUE	False	TRUE	False	False	False	False	False
	Epimed Monitor	General/Mixed	False	H1654	two	Public	Brazil	AGE2182	13	550541a5-e6e8-4551-a5ea-889e4fc4edaf	1655843	81	2021-02-27	21:30	Clinic	False	False	False	Death	Death	No	2	6	Independent	False	False	False	False	False	False	False	False	False		False			False	TRUE	False	False	TRUE	False	False	False	False	False	False	False
	Epimed Monitor	General/Mixed	False	H1654	two	Public	Brazil	AGE2182	13	e80bcd44-eb1c-488d-8a60-d271fed3ed7e	48506	44	2021-02-28	01:25	Clinic	False	False	False	Death	Death	No	6	8	Independent	False	False	False	False	False	False	False	False	False		False			False	False	False	False	False	False	False	False	False	False	False	False
	Epimed Monitor	General/Mixed	False	H1654	two	Public	Brazil	AGE2182	13	12030b88-76d1-4955-98af-55e140dc9ea8	228617	57	2021-02-28	11:40	Clinic	False	False	False	Death	Death	No	20	22	Independent	False	False	False	False	False	False	False	False	False		False			False	False	False	False	TRUE	False	TRUE	False	False	False	False	False
	Epimed Monitor	General/Mixed	False	H1654	two	Public	Brazil	AGE2182	13	3dae5028-11e3-4ec4-be17-b5e33558f933	1111463	32	2021-03-02	11:40	Clinic	False	False	False	Death	Death	No	12	12	Independent	False	False	False	False	False	False	False	False	False		False			False	False	False	False	TRUE	False	False	False	False	False	False	False
	Epimed Monitor	General/Mixed	False	H1654	two	Public	Brazil	AGE2182	13	6e028b6c-a309-4ec3-a362-6ff967208c9a	1656328	43	2021-03-02	14:40	Clinic	False	False	False	Death	Death	No	6	8	Independent	False	False	False	False	False	False	False	False	False		False			False	False	False	False	TRUE	False	False	False	False	False	False	False
	Epimed Monitor	General/Mixed	False	H1654	two	Public	Brazil	AGE2182	13	934152ac-7008-4260-8218-1338dcee76f0	1656577	57	2021-03-02	15:00	Clinic	False	False	False	Death	Death	No	5	5	Independent
	Epimed Monitor	General/Mixed	False	H1654	two	Public	Brazil	AGE2182	13	087a57f2-f872-4b43-a0da-ebfb7a6e8665	292562	68	2021-03-03	12:00 pm	Clinic	False	False	False	Death	Death	No	11	16	Independent	False	False	False	False	False	False	False	False	False		False			False	False	False	False	TRUE	False	False	False	False	False	False	False
	Epimed Monitor	General/Mixed	False	H1654	two	Public	Brazil	AGE2182	13	5dcbde6c-a447-46a8-9cf4-a71acb3e76cf	145751	21	2021-03-04	13:00	Clinic	False	False	False	High	High	No	26	28	Independent
	Epimed Monitor	General/Mixed	False	H1654	two	Public	Brazil	AGE2182	13	0536e8d9-bf80-4260-92f3-c8a1561b1177	52090	75	2021-03-06	11:00	Clinic	False	False	False	Death	Death	No	10	12	Independent	False	False	TRUE	False	False	False	False	False	False		False			False	False	False	False	TRUE	TRUE	TRUE	False	False	False	False	False
	Epimed Monitor	General/Mixed	False	H1654	two	Public	Brazil	AGE2182	13	58bdf394-fdab-49db-a575-2b3c5e6c4adc	42786	54	2021-03-06	11:30	Clinic	False	False	False	Death	Death	No	41	43	Independent
	Epimed Monitor	General/Mixed	False	H1654	two	Public	Brazil	AGE2182	13	1cf20514-51bb-4e12-a27d-7b4f78eb9fc5	25387	68	2021-03-07	12:00 pm	Clinic	False	False	False	Death	Death	No	22	22	Independent	False	False	False	False	False	False	False	False	False		False			False	False	False	False	TRUE	False	False	False	False	False	False	False
	Epimed Monitor	General/Mixed	TRUE	H1654	two	Public	Brazil	AGE2182	13	4e2524fe-8aad-4a70-b004-c136d5940f24	1656909	49	2021-03-07	14:00	Clinic	False	False	False	Death	Death	No	1	1	Independent	False	False	False	False	False	False	False	False	False		False			False	False	False	False	False	TRUE	False	False	False	False	False	False
	Epimed Monitor	General/Mixed	False	H1654	two	Public	Brazil	AGE2182	13	c5276331-494e-43a1-8e38-4736d8002039	306371	66	2021-03-08	12:00 pm	Clinic	False	False	False	Death	Death	No	22	22	Independent
	Epimed Monitor	General/Mixed	False	H1654	two	Public	Brazil	AGE2182	13	de26cc83-4826-4fad-b6b5-d3c612a30482	186686	55	2021-03-12	21:00	Clinic	False	False	False	Death	Death	No	6	6	Independent	False	False	False	False	False	False	False	False	False		False			False	False	False	False	TRUE	False	False	False	False	False	False	False
	Epimed Monitor	General/Mixed	False	H1654	two	Public	Brazil	AGE2182	13	c0874f8e-46bf-49b5-a98b-fbc1c3531192	1657418	41	2021-03-13	21:00	Clinic	False	False	False	High	Death	No	14	18	Independent	False	False	False	False	False	False	False	False	False		False			False	False	False	False	TRUE	False	False	False	False	False	False	False
	Epimed Monitor	General/Mixed	False	H1654	two	Public	Brazil	AGE2182	13	e00d3a6d-1bdf-4064-8e9e-f1c42da33dec	1657445	43	2021-03-14	22:49	Clinic	False	False	False	Death	Death	No	6	6	Independent
	Epimed Monitor	General/Mixed	False	H1654	two	Public	Brazil	AGE2182	13	999720ac-cfa3-490c-b4d9-8955c4601832	1657473	58	2021-03-15	00:50	Clinic	False	False	False	Death	Death	No	8	8	Independent
	Epimed Monitor	General/Mixed	False	H1654	two	Public	Brazil	AGE2182	13	e73e5df4-bc3c-4412-8239-3397908ae0f6	1657538	70	2021-03-15	12:40	Clinic	False	False	False	Death	Death	No	2	2	Independent	False	False	False	False	False	False	False	False	False		False			False	False	False	False	TRUE	False	TRUE	False	False	False	False	False
	Epimed Monitor	General/Mixed	False	H1654	two	Public	Brazil	AGE2182	13	c71c81c7-3f0a-4dae-b994-457f1ff47f2d	1657767	47	2021-03-16	16:33	Clinic	False	False	False	Death	Death	No	12	12	Independent	False	False	False	False	False	False	False	False	False		False			False	False	False	False	TRUE	TRUE	False	False	False	False	False	False
	Epimed Monitor	General/Mixed	False	H1654	two	Public	Brazil	AGE2182	13	f68cb4b0-03d5-439e-9191-d177226b094c	1657778	30	2021-03-16	20:58	Clinic	False	False	False	Death	Death	No	4	4	Independent	False	False	False	False	False	False	False	False	False		False			False	False	False	False	False	False	False	False	False	False	False	False
	Epimed Monitor	General/Mixed	False	H1654	two	Public	Brazil	AGE2182	13	95134bb1-5bae-4481-b9da-bfb73132cdac	1657791	68	2021-03-17	00:20	Clinic	False	False	False	Death	Death	No	6	6	Independent	False	False	False	False	False	False	False	False	False		False			False	False	False	False	TRUE	False	False	False	False	False	False	False
	Epimed Monitor	General/Mixed	False	H1654	two	Public	Brazil	AGE2182	13	9802cf92-a9ae-4d39-80fc-f5e556c6729b	1658041	61	2021-03-19	00:05	Clinic	False	False	False	Death	Death	No	4	4	Independent
	Epimed Monitor	General/Mixed	False	H1654	two	Public	Brazil	AGE2182	13	621a401d-a89e-41ad-9cfd-e01346b1a3c1	1658169	58	2021-03-19	21:00	Clinic	False	False	False	High	High	No	24	32	Independent	False	False	False	False	False	False	False	False	False		False			False	False	False	False	TRUE	False	False	False	False	False	False	False
	Epimed Monitor	General/Mixed	False	H1654	two	Public	Brazil	AGE2182	13	390f0a86-6323-44af-9bc5-b552ee5f60d7	1657783	84	2021-03-19	21:15	Clinic	False	False	False	Death	Death	No	2	5	Independent	False	False	False	False	False	False	False	False	False		False			False	False	False	False	TRUE	False	TRUE	False	False	False	False	False
	Epimed Monitor	General/Mixed	False	H1654	two	Public	Brazil	AGE2182	13	b9f45de1-2ed3-4801-b5f2-a3732ac80a05	1657626	67	2021-03-20	14:20	Clinic	False	False	False	Death	Death	No	23	28	Independent	TRUE	False	False	False	False	False	False	False	False		False			False	False	False	False	TRUE	False	TRUE	False	False	False	False	False
	Epimed Monitor	General/Mixed	False	H1654	two	Public	Brazil	AGE2182	13	f8140285-b4fb-4138-a554-db9a9fa6947b	1658204	59	2021-03-20	20:10	Clinic	False	False	False	Death	Death	No	1	1	Independent	False	False	False	False	False	False	False	False	False		False			False	TRUE	False	False	TRUE	False	TRUE	False	False	False	False	False
	Epimed Monitor	General/Mixed	False	H1654	two	Public	Brazil	AGE2182	13	1cbc6fee-7e44-4f78-b3b9-4ca67360fde1	1658337	60	2021-03-22	13:42	Clinic	False	False	False	Death	Death	No	12	12	Independent	False	False	False	False	False	False	False	TRUE	False	Thyroid	False			False	False	False	False	TRUE	False	TRUE	False	False	False	False	False
	Epimed Monitor	General/Mixed	False	H1654	two	Public	Brazil	AGE2182	13	eb71ff8b-72b8-46b3-a6d8-1de014b7a675	1658259	51	2021-03-23	14:30	Clinic	False	False	False	Death	Death	No	6	8	Independent
	Epimed Monitor	General/Mixed	False	H1654	two	Public	Brazil	AGE2182	13	72f3a624-6077-4064-bcf1-6583c2992bf2	1658428	70	2021-03-23	16:30	Clinic	False	False	False	Death	Death	No	24	25	Independent	TRUE	False	False	False	False	False	False	False	False		False			False	False	False	False	TRUE	False	False	False	False	False	False	False
	Epimed Monitor	General/Mixed	False	H1654	two	Public	Brazil	AGE2182	13	59270aa3-c730-4198-b177-b66e18ff9015	1658387	72	2021-03-23	17:30	Clinic	False	False	False	Death	Death	No	8	9	Independent	False	False	False	False	False	False	False	False	False		False			False	TRUE	False	False	False	False	False	False	False	False	False	False
	Epimed Monitor	General/Mixed	False	H1654	two	Public	Brazil	AGE2182	13	3d8e6fce-6e22-4cf2-abd0-cd8b4d31c750	1658713	58	2021-03-26	8 o'clock	Clinic	False	False	False	Death	Death	No	1	2	Independent	False	False	False	False	False	False	False	False	False		False			False	False	False	False	TRUE	False	False	False	False	False	False	False
	Epimed Monitor	General/Mixed	False	H1654	two	Public	Brazil	AGE2182	13	3fc4ea20-9ae6-466f-b8fa-fb8686ecd006	1658819	60	2021-03-27	16:31	Clinic	False	False	False	Death	Death	No	2	4	Independent
	Epimed Monitor	General/Mixed	False	H1654	two	Public	Brazil	AGE2182	13	3386f50b-6aa5-419e-9183-ebcff105a4d9	1657899	51	2021-03-27	22:30	Clinic	False	False	False	Death	Death	No	7	17	Independent
	Epimed Monitor	General/Mixed	False	H1654	two	Public	Brazil	AGE2182	13	8e33eb68-f0d5-4197-8657-2bbd7eb4b830	1659244	53	2021-03-29	16:46	Clinic	False	False	False	Death	Death	No	15	15	Independent
	Epimed Monitor	General/Mixed	False	H1654	two	Public	Brazil	AGE2182	13	e035c233-8034-4596-b810-500a85affa7a	1659253	53	2021-03-29	18:07	Clinic	False	False	False	Death	Death	Yeah, don't step up	20	20	Independent	False	False	False	False	False	False	False	False	False		TRUE	2	Leukemia	False	False	False	False	False	False	False	False	False	False	False	False
	Epimed Monitor	General/Mixed	False	H1654	two	Public	Brazil	AGE2182	13	4472c21f-f21f-4103-ac32-e1def678c3fe	1658683	68	2021-03-29	21:30	Clinic	False	False	False	Death	Death	No	1	6	Independent	False	False	False	False	False	False	False	False	False		False			False	False	False	False	TRUE	False	TRUE	False	False	False	False	False
	Epimed Monitor	General/Mixed	False	H1654	two	Public	Brazil	AGE2182	13	3ba69feb-0d4c-4566-9278-d71dbd96ff4a	1613868	81	2021-03-29	23:30	Clinic	False	False	False	Death	Death	No	1	3	Independent	TRUE	False	TRUE	False	False	False	False	False	False		False			False	TRUE	False	False	TRUE	False	False	False	False	False	False	False
	Epimed Monitor	General/Mixed	False	H1654	two	Public	Brazil	AGE2182	13	7fe9d391-5b06-4a9d-ba49-b000237043b7	1658008	40	2021-03-30	13:51	Clinic	False	False	False	Death	Death	No	19	19	Independent
	Epimed Monitor	General/Mixed	False	H1654	two	Public	Brazil	AGE2182	13	f5085381-b16f-4c7e-ab62-2818c77583f7	1659459	54	2021-03-31	10:51	Clinic	False	False	False	Death	Death	No	2	2	Independent	False	False	TRUE	False	False	False	False	False	False		False			False	False	False	False	TRUE	False	False	TRUE	False	False	False	False
	Epimed Monitor	General/Mixed	False	H1654	two	Public	Brazil	AGE2182	13	48e7d69c-0c57-4a7a-b370-e5f635987cd0	1659089	56	2021-03-31	11:44	Clinic	False	False	False	Death	Death	No	26	27	Independent
	Epimed Monitor	General/Mixed	False	H1654	two	Public	Brazil	AGE2182	13	886bf9f6-553f-4c4a-a78d-f132cf36c6db	1659080	69	2021-03-31	11:51	Clinic	False	False	False	Death	Death	No	13	16	Independent	False	False	False	False	False	False	False	False	False		False			False	False	False	False	False	False	TRUE	False	False	False	False	False
	Epimed Monitor	General/Mixed	False	H1654	two	Public	Brazil	AGE2182	13	47b1e1bf-d5b4-42be-81a8-c3081f69375e	1657760	61	2021-04-01	11:35	Clinic	False	False	False	Death	Death	No	17	33	Independent	False	False	False	False	False	False	False	False	False		False			False	False	False	False	TRUE	False	False	False	False	False	False	False
	Epimed Monitor	General/Mixed	False	H1654	two	Public	Brazil	AGE2182	13	4df7cf63-6c9d-4f4f-9eb0-9129166ef40b	1659651	49	2021-04-02	21:20	Clinic	False	False	False	Death	Death	No	37	38	Independent	False	False	False	False	False	False	False	False	False		False			False	False	False	False	TRUE	False	False	False	False	False	False	False
	Epimed Monitor	General/Mixed	False	H1654	two	Public	Brazil	AGE2182	13	727d28f3-113a-454d-aa39-720309e61e1d	1659780	29	2021-04-03	21:30	Clinic	False	False	False	Death	Death	No	23	23	Independent
	Epimed Monitor	General/Mixed	False	H1654	two	Public	Brazil	AGE2182	13	ff63e9c9-183f-43a4-a6ae-210993d0e4e3	1659926	61	2021-04-05	13:30	Clinic	False	False	False	High	High	No	7	36	Independent	False	False	False	False	False	False	False	False	False		False			False	TRUE	False	False	False	False	False	False	False	False	False	False
	Epimed Monitor	General/Mixed	False	H1654	two	Public	Brazil	AGE2182	13	0e2b29d7-73a1-4f77-a456-bdbd7859c908	1555463	74	2021-04-12	17:39	Clinic	False	False	False	Death	Death	No	6	9	Independent	False	False	False	False	False	False	False	False	False		False			False	False	False	False	TRUE	False	False	TRUE	False	TRUE	False	False
	Epimed Monitor	General/Mixed	False	H1654	two	Public	Brazil	AGE2182	13	ced4156a-57ea-4285-aa64-7f203c9cbc30	1660935	25	2021-04-12	21:00	Clinic	False	False	False	High	High	No	19	25	Independent	False	False	False	False	False	False	False	False	False		False			False	False	False	False	False	False	False	False	False	False	False	False
	Epimed Monitor	General/Mixed	False	H1654	two	Public	Brazil	AGE2182	13	f2443c36-0931-4563-a64d-11debe529e5f	169534	39	2021-04-13	00:30	Clinic	False	False	False	Death	Death	No	29	32	Independent
	Epimed Monitor	General/Mixed	False	H1654	two	Public	Brazil	AGE2182	13	1eda68ed-b274-48cf-887d-9111b9ef53d0	1660338	32	2021-04-13	15:26	Clinic	False	False	False	High	High	No	6	16	Independent	False	False	False	False	False	False	False	False	False		False			False	False	False	False	False	False	False	False	False	False	False	False
	Epimed Monitor	General/Mixed	False	H1654	two	Public	Brazil	AGE2182	13	b877a897-5fa8-4207-8017-0bd96ea5f0d5	1660727	69	2021-04-14	15:20	Clinic	False	False	False	Death	Death	No	13	17	Independent	False	False	False	False	False	False	False	False	False		False			False	False	False	False	TRUE	False	TRUE	False	False	False	False	False
	Epimed Monitor	General/Mixed	False	H1654	two	Public	Brazil	AGE2182	13	e56e6def-8f93-48cd-ab37-ca7b037f0d97	1659516	25	2021-04-16	12:30	Clinic	False	False	False	High	High	No	26	54	Independent	False	False	False	False	False	False	False	False	False		False			False	False	False	False	TRUE	TRUE	False	False	False	False	False	False
	Epimed Monitor	General/Mixed	False	H1654	two	Public	Brazil	AGE2182	13	1f5c5221-2cf1-4e1e-a6c2-fcec37813a59	1661645	74	2021-04-16	21:28	Clinic	False	False	False	High	High	No	3	14	Independent	False	False	False	False	False	False	False	False	False		False			False	False	False	False	TRUE	False	False	False	False	False	TRUE	False
	Epimed Monitor	General/Mixed	False	H1654	two	Public	Brazil	AGE2182	13	50d748e8-ba52-4015-a127-b64b85fe6e90	1661502	35	2021-04-18	17:43	Clinic	False	False	False	High	High	No	17	24	Independent
	Epimed Monitor	General/Mixed	False	H1654	two	Public	Brazil	AGE2182	13	7257c3c2-120b-4f9d-804b-b24c9f5d3025	1661814	64	2021-04-19	12:00 pm	Clinic	False	False	False	High	High	No	4	12	Independent
	Epimed Monitor	General/Mixed	False	H1654	two	Public	Brazil	AGE2182	13	cab725d9-c74f-4ec0-907f-1a04cd1882b8	16073	74	2021-04-19	20:37	Clinic	False	False	False	Death	Death	No	4	5	Independent	False	False	False	False	False	False	False	False	False		False			False	False	False	False	TRUE	False	TRUE	False	False	False	False	False
	Epimed Monitor	General/Mixed	False	H1654	two	Public	Brazil	AGE2182	13	44ac0aa4-0b75-41fa-8e7e-56452ba71761	1662015	52	2021-04-20	00:20	Clinic	False	False	False	High	High	No	5	13	Independent	False	False	False	False	False	False	False	False	False		False			False	False	False	False	False	False	False	False	False	False	False	False
	Epimed Monitor	General/Mixed	False	H1654	two	Public	Brazil	AGE2182	13	26f95d38-addf-40fe-9579-20e86e2be754	1661668	62	2021-04-20	01:22	Clinic	False	False	False	High	High	No	26	32	Independent
	Epimed Monitor	General/Mixed	False	H1654	two	Public	Brazil	AGE2182	13	4dc72412-930a-4b92-95d4-3ff0f13e004c	1662010	56	2021-04-20	23:13	Clinic	False	False	False	Death	Death	No	27	27	Independent	False	False	False	False	False	False	False	False	False		False			False	False	False	False	TRUE	False	TRUE	False	False	False	False	False
	Epimed Monitor	General/Mixed	False	H1654	two	Public	Brazil	AGE2182	13	fc7881c8-1a67-4ecf-b8dd-60f10422c3fd	1661626	62	2021-04-23	21:50	Clinic	False	False	False	Death	Death	No	7	14	Independent	False	False	False	False	False	False	False	False	False		False			False	False	False	False	TRUE	False	TRUE	False	False	False	False	False
	Epimed Monitor	General/Mixed	False	H1654	two	Public	Brazil	AGE2182	13	c6be4bad-f0ff-45aa-a8bf-c98735107f8d	1662370	32	2021-04-26	10:20	Clinic	False	False	False	Death	Death	No	13	15	Independent	False	False	False	False	False	False	False	False	TRUE	Kidney and urinary tract	False			TRUE	False	False	False	False	False	False	False	False	False	False	False
	Epimed Monitor	General/Mixed	False	H1654	two	Public	Brazil	AGE2182	13	087c2aef-af88-4d89-8619-34be41cfd3c6	1662449	38	2021-04-26	10:30	Clinic	False	False	False	Death	Death	No	27	32	Independent
	Epimed Monitor	General/Mixed	False	H1654	two	Public	Brazil	AGE2182	13	d8cf7ec0-3afd-4338-969e-4422fa257dd5	1662620	46	2021-04-27	00:20	Clinic	False	False	False	High	High	No	16	22	Independent	False	False	False	False	False	False	False	False	False		False			False	False	False	False	False	TRUE	False	False	False	False	False	False
	Epimed Monitor	General/Mixed	False	H1654	two	Public	Brazil	AGE2182	13	e898e429-c322-47b7-8c88-80e4b2b1d493	1662926	62	2021-04-28	17:30	Clinic	False	False	False	Death	Death	No	6	6	Independent	False	False	False	False	False	False	False	False	False		False			False	False	False	False	TRUE	False	TRUE	False	False	False	False	False
	Epimed Monitor	General/Mixed	False	H1654	two	Public	Brazil	AGE2182	13	cf6f6d7e-23aa-46c9-a758-eedcd836dc9f	1663049	75	2021-04-29	15:10	Clinic	False	False	False	High	High	No	5	11	Independent	False	False	False	False	False	False	False	False	False		False			False	False	False	False	TRUE	False	TRUE	False	False	False	False	False
	Epimed Monitor	General/Mixed	False	H1654	two	Public	Brazil	AGE2182	13	cb1ef24f-3932-463f-b76a-64b4fc13d32a	1662416	44	2021-04-30	18:49	Clinic	False	False	False	Death	Death	No	8	13	Independent
	Epimed Monitor	General/Mixed	False	H1654	two	Public	Brazil	AGE2182	13	c3d75d16-1486-4391-b725-e02dfb6eb369	1662654	67	2021-05-01	16:36	Clinic	False	False	False	Death	Death	No	6	10	Independent	False	False	False	False	False	False	False	TRUE	False	Large intestine/anal canal	False			False	False	False	False	False	False	False	False	False	False	False	False
	Epimed Monitor	General/Mixed	False	H1654	two	Public	Brazil	AGE2182	13	90678301-97af-4efd-87ae-b6ea728b2ad2	1663594	57	2021-05-04	15:00	Clinic	False	False	False	Death	Death	No	9	9	Independent	False	False	False	False	False	False	False	False	False		False			False	False	False	False	TRUE	False	TRUE	False	False	False	False	False
	Epimed Monitor	General/Mixed	False	H1654	two	Public	Brazil	AGE2182	13	191f6645-fff1-4c13-bd97-e2e6fdb9ddfd	1663131	36	2021-05-04	23:20	Clinic	False	False	False	High	High	No	22	29	Independent
	Epimed Monitor	General/Mixed	False	H1654	two	Public	Brazil	AGE2182	13	99ebb37f-91cf-4a59-a568-885aed05cddf	1662655	41	2021-05-06	00:14	Clinic	False	False	False	High	High	No	14	28	Independent	False	False	False	False	False	False	False	False	False		False			False	False	False	False	TRUE	False	False	False	False	False	False	False
	Epimed Monitor	General/Mixed	False	H1654	two	Public	Brazil	AGE2182	13	a651157b-1c33-4e1b-a0f4-361bf29609c0	1663442	26	2021-05-07	14:30	Clinic	False	False	False	High	High	No	6	9	Independent
	Epimed Monitor	General/Mixed	False	H1654	two	Public	Brazil	AGE2182	13	dfab5a70-818b-4bcb-a168-9f41064acced	1663231	51	2021-05-08	22:30	Clinic	False	False	False	High	High	No	17	31	Independent
	Epimed Monitor	General/Mixed	False	H1654	two	Public	Brazil	AGE2182	13	479acf4f-b29e-4233-9143-960613bf0441	1664044	43	2021-05-10	12:37	Clinic	False	False	False	High	High	No	4	12	Independent
	Epimed Monitor	General/Mixed	False	H1654	two	Public	Brazil	AGE2182	13	63daa292-1075-4537-9c3c-1a467d7c65bd	1664012	66	2021-05-10	15:00	Clinic	False	False	False	Death	Death	No	18	18	Independent	False	False	False	False	False	False	False	False	False		False			False	False	False	False	TRUE	False	False	False	False	False	False	False
	Epimed Monitor	General/Mixed	False	H1654	two	Public	Brazil	AGE2182	13	4e47923d-5b1f-4242-81e2-fe943278b9d9	1664509	50	2021-05-12	21:17	Clinic	False	False	False	High		No	8		Independent
	Epimed Monitor	General/Mixed	False	H1654	two	Public	Brazil	AGE2182	13	9bc1c6e8-6972-474a-8965-1b3e1fa07bd0	1664113	63	2021-05-13	10:20	Clinic	False	False	False	High	High	No	10	21	Independent	False	False	False	False	False	False	False	False	False		False			False	False	False	False	TRUE	False	TRUE	False	False	False	False	False
	Epimed Monitor	General/Mixed	False	H1654	two	Public	Brazil	AGE2182	13	2e368533-515d-451d-af1e-d31812c7c6b3	1664061	72	2021-05-13	4:00 pm	Clinic	False	False	False	Death	Death	No	7	12	Independent	False	False	TRUE	False	False	False	False	False	False		False			False	False	False	False	TRUE	False	False	False	False	False	False	False
	Epimed Monitor	General/Mixed	False	H1654	two	Public	Brazil	AGE2182	13	9b33437c-c577-4c02-9337-9281ad82d0da	1664730	64	2021-05-13	20:30	Clinic	False	False	False	High	High	No	4	7	Need for assistance	False	False	False	False	False	False	False	False	False		False			False	False	False	False	False	False	False	False	False	False	False	False
	Epimed Monitor	General/Mixed	False	H1654	two	Public	Brazil	AGE2182	13	3a9d215c-0fe4-4a87-b5af-eb9635f6c7b8	1664487	60	2021-05-14	13:34	Clinic	False	False	False	Death	Death	No	25	27	Independent
	Epimed Monitor	General/Mixed	False	H1654	two	Public	Brazil	AGE2182	13	c345c2c5-311a-4689-80ee-daa41ceefce8	1664336	55	2021-05-14	14:00	Clinic	False	False	False	Death	Death	No	12	15	Independent	False	False	False	False	False	False	False	False	False		False			False	False	False	False	TRUE	False	TRUE	False	False	False	False	False
	Epimed Monitor	General/Mixed	False	H1654	two	Public	Brazil	AGE2182	13	496b7e9c-4d94-49c0-8a7c-f25e2ddef72f	1664917	63	2021-05-16	18:00	Clinic	False	False	False	Death	Death	No	13	13	Independent	False	False	False	False	False	False	False	False	False		False			False	False	False	False	TRUE	False	False	False	False	False	False	False
	Epimed Monitor	General/Mixed	False	H1654	two	Public	Brazil	AGE2182	13	4080dbe9-2b81-4b3d-b1b2-5517e1f468b8	1664810	34	2021-05-17	23:00	Clinic	False	False	False	High	High	No	3	11	Independent
	Epimed Monitor	General/Mixed	False	H1654	two	Public	Brazil	AGE2182	13	90a1223d-8329-48ba-95f3-188cbd7a8540	1664177	59	2021-05-19	15:00	Clinic	False	False	False	High		No	20		Independent	False	False	False	False	False	False	False	False	False		False			False	False	False	False	False	False	TRUE	False	False	False	False	False
	Epimed Monitor	General/Mixed	False	H1654	two	Public	Brazil	AGE2182	13	dcaa9417-9e1f-498f-98ac-0910b3d2ff92	1665423	65	2021-05-20	14:30	Clinic	False	False	False	High		No	19		Independent	False	False	False	False	False	False	False	False	False		False			False	False	False	False	False	False	False	False	False	False	False	False
	Epimed Monitor	General/Mixed	False	H1654	two	Public	Brazil	AGE2182	13	708e8685-b76d-4fe1-badc-4870c4069554	1665269	60	2021-05-20	22:10	Clinic	False	False	False	Death	Death	No	7	8	Independent	TRUE	False	False	False	False	False	False	False	False		False			False	False	False	False	TRUE	TRUE	TRUE	False	False	False	False	False
	Epimed Monitor	General/Mixed	False	H1654	two	Public	Brazil	AGE2182	13	f502b5f1-5c71-42c4-a15d-f3f2e3f961cd	1120657	44	2021-05-21	14:30	Clinic	False	False	False	Death	Death	No	10	12	Independent
	Epimed Monitor	General/Mixed	False	H1654	two	Public	Brazil	AGE2182	13	c64f197d-e21d-4e59-948f-461766f4dc6c	1665868	62	2021-05-23	14:00	Clinic	False	False	False	High		No	12		Independent	False	False	False	False	False	False	False	False	False		False			False	False	False	False	TRUE	False	TRUE	False	False	False	False	False
	Epimed Monitor	General/Mixed	False	H1654	two	Public	Brazil	AGE2182	13	36682bed-b1ac-4c14-a197-757f04f5f1f3	230143	41	2021-05-23	20:46	Clinic	False	False	False	Death	Death	No	11	13	Need for assistance	False	False	False	False	False	False	False	False	False		False			False	False	False	False	TRUE	False	False	False	False	False	False	False
	Epimed Monitor	General/Mixed	False	H1654	two	Public	Brazil	AGE2182	13	9c76f9e0-2b21-486a-9f3d-a38ebebb5b15	1665999	58	2021-05-24	14:30	Clinic	False	False	False	Death	Death	No	4	4	Independent
	Epimed Monitor	General/Mixed	False	H1654	two	Public	Brazil	AGE2182	13	b0ba9b67-499d-4ebd-a19d-315190e44413	1666195	35	2021-05-25	16:50	Clinic	False	False	False	Death	Death	No	17	17	Independent	False	False	False	False	False	False	False	False	False		False			False	False	False	False	False	False	False	False	False	False	False	False
	Epimed Monitor	General/Mixed	False	H1654	two	Public	Brazil	AGE2182	13	33339c8a-ad8d-4251-bd06-5202ce731cf9	1666094	45	2021-05-26	10:00 am	Clinic	False	False	False	Death	Death	No	4	6	Independent	False	False	False	False	False	False	False	False	False		False			False	False	False	False	False	False	TRUE	False	False	False	False	False
	Epimed Monitor	General/Mixed	False	H1654	two	Public	Brazil	AGE2182	13	1e463433-1ae9-44da-9e53-48dd0265b6e8	1665869	56	2021-05-26	22:00	Clinic	False	False	False	High	High	No	3	11	Independent	False	False	False	False	False	False	False	False	False		False			False	False	False	False	TRUE	False	TRUE	False	False	False	False	False
	Epimed Monitor	General/Mixed	False	H1654	two	Public	Brazil	AGE2182	13	7b13390c-4990-43e7-86b8-d4b9418edc51	1666303	39	2021-05-27	11:30	Clinic	False	False	False	High		No	26		Independent
	Epimed Monitor	General/Mixed	False	H1654	two	Public	Brazil	AGE2182	13	97cba21b-2a5d-4296-965d-97e9ecf53b30	1665803	38	2021-05-28	10:00 am	Clinic	False	False	False	Death	Death	No	20	25	Independent	False	False	False	False	False	False	False	False	False		False			False	False	False	False	False	False	TRUE	False	False	False	False	False
	Epimed Monitor	General/Mixed	False	H1654	two	Public	Brazil	AGE2182	13	59a8f386-f791-418b-bbcd-0a669734f9eb	1666119	30	2021-05-29	02:00	Clinic	False	False	False	High		No	24		Independent
	Epimed Monitor	General/Mixed	False	H1654	two	Public	Brazil	AGE2182	13	0726b8f5-9667-4e5a-82c6-8e8642f658c6	1666906	29	2021-05-29	18:00	Clinic	False	False	False	Death	Death	No	14	14	Independent	False	False	False	False	False	False	False	False	False		False			False	False	False	False	TRUE	False	TRUE	False	False	False	False	False
	Epimed Monitor	General/Mixed	False	H1654	two	Public	Brazil	AGE2182	13	0a7938bd-b371-432c-ab42-7d8941660244	1666250	40	2021-05-29	21:30	Clinic	False	False	False	High		No	8		Independent
	Epimed Monitor	General/Mixed	False	H1654	two	Public	Brazil	AGE2182	13	9e09c370-855a-475d-88bb-855873d5d5df	1666650	48	2021-05-30	09:30	Clinic	False	False	False	Death	Death	No	10	12	Independent	False	False	False	False	False	False	False	False	False		False			False	False	False	False	TRUE	False	TRUE	False	False	False	False	False
	Epimed Monitor	General/Mixed	False	H1654	two	Public	Brazil	AGE2182	13	9106254d-687e-4746-be53-8cf74d8a438e	1666963	58	2021-06-01	00:50	Clinic	False	False	False	High		No	7		Independent	False	False	False	False	False	False	False	False	False		False			False	False	False	False	False	False	False	False	False	False	False	False
	Epimed Monitor	General/Mixed	False	H1654	two	Public	Brazil	AGE2182	13	e259c9d3-6e9f-4224-a5d3-21093c1168cf	1667093	51	2021-06-03	18:00	Clinic	False	False	False	Death	Death	No	10	13	Independent
	Epimed Monitor	General/Mixed	False	H1654	two	Public	Brazil	AGE2182	13	ff0dc8db-d280-4163-8618-5169f6f576bd	1667252	49	2021-06-04	14:40	Clinic	False	False	False	High		No	18		Independent	False	False	False	False	False	False	False	False	False		False			False	False	False	False	TRUE	False	False	False	False	TRUE	False	False
	Epimed Monitor	General/Mixed	False	H1654	two	Public	Brazil	AGE2182	13	d2acd3d7-7edf-42a0-940c-19811a513adb	1667091	32	2021-06-06	17:00	Clinic	False	False	False	High		No	23		Independent
	Epimed Monitor	General/Mixed	False	H1654	two	Public	Brazil	AGE2182	13	f42ef9d9-33be-4e50-8591-7f30cd2a2e57	1667335	53	2021-06-08	19:13	Clinic	False	False	False	Death	Death	No	12	12	Independent
	Epimed Monitor	General/Mixed	False	H1654	two	Public	Brazil	AGE2182	13	55674560-586c-4cb2-b6d0-ded47553eed0	1668108	42	2021-06-08	21:20	Clinic	False	False	False	High		No	12		Independent	False	False	False	False	False	False	False	False	False		False			False	False	False	False	False	False	TRUE	False	False	False	False	False
	Epimed Monitor	General/Mixed	False	H1654	two	Public	Brazil	AGE2182	13	c3afe6c3-ba21-43c9-8083-c4a5bb28f36d	1668138	55	2021-06-09	00:20	Clinic	False	False	False	High		No	20		Independent
	Epimed Monitor	General/Mixed	False	H1654	two	Public	Brazil	AGE2182	13	ed3dce40-9f10-4bd5-902f-93f2a5fed36e	1667642	68	2021-06-09	21:40	Clinic	False	False	False	Death	Death	No	7	7	Independent
	Epimed Monitor	General/Mixed	False	H1654	two	Public	Brazil	AGE2182	13	0d77aeb6-eeea-4c7e-91ed-79274d2d4efc	332199	46	2021-06-10	00:16	Clinic	False	False	False	Death	Death	No	21	33	Independent
	Epimed Monitor	General/Mixed	False	H1654	two	Public	Brazil	AGE2182	13	efb109c1-2bd4-45ee-a139-a2954156ee33	1668305	66	2021-06-11	13:00	Clinic	False	False	False	High		No	3		Independent	TRUE	False	False	False	False	False	False	False	False		False			False	False	False	False	TRUE	False	False	False	False	False	False	False
	Epimed Monitor	General/Mixed	False	H1654	two	Public	Brazil	AGE2182	13	68aaad74-201d-4224-b833-286681167587	1668443	57	2021-06-12	23:45	Clinic	False	False	False	Death	Death	No	32	34	Independent
	Epimed Monitor	General/Mixed	False	H1654	two	Public	Brazil	AGE2182	13	d3bb0be4-29e5-410b-bf4c-e565534a12f8	1668683	53	2021-06-13	13:00	Clinic	False	False	False	Death	Death	No	29	29	Independent	False	False	False	False	False	False	False	False	False		False			False	False	False	False	TRUE	False	False	False	False	TRUE	False	False
	Epimed Monitor	General/Mixed	False	H1654	two	Public	Brazil	AGE2182	13	2f0d1527-54f3-4d83-9c20-f5a35fd40e31	1668703	66	2021-06-14	8:00 pm	Clinic	False	False	False	Death	Death	No	20	20	Independent	False	False	False	False	False	False	False	False	False		False			TRUE	False	False	False	False	False	False	False	False	False	False	False
	Epimed Monitor	General/Mixed	False	H1654	two	Public	Brazil	AGE2182	13	620ad0fb-62cb-4a99-938b-4f495c172392	1669225	35	2021-06-16	23:40	Clinic	False	False	False	High		No	14		Independent
	Epimed Monitor	General/Mixed	False	H1654	two	Public	Brazil	AGE2182	13	f2e2396c-e75a-4912-8bb2-356faec8c71d	1669204	49	2021-06-17	14:30	Clinic	False	False	False	Death	Death	No	5	5	Independent	False	False	False	False	False	False	False	TRUE	False	Breast	False			False	False	False	False	TRUE	False	TRUE	False	False	False	False	False
	Epimed Monitor	General/Mixed	False	H1654	two	Public	Brazil	AGE2182	13	dbe7f608-45fa-44e9-a7b9-bff65323c9db	1669387	63	2021-06-20	4:00 pm	Clinic	False	False	False	Death	Death	No	15	16	Independent	False	False	False	False	False	False	False	False	False		False			False	False	False	False	False	False	TRUE	False	False	False	False	False
	Epimed Monitor	General/Mixed	False	H1654	two	Public	Brazil	AGE2182	13	e18ea277-dbf8-45b8-8cdc-8faf0a53cda6	1669604	76	2021-06-21	00:15	Clinic	False	False	False	Death	Death	No	1	2	Independent	False	False	False	False	False	False	False	False	False		False			False	False	False	False	TRUE	False	False	False	False	False	False	False
	Epimed Monitor	General/Mixed	False	H1654	two	Public	Brazil	AGE2182	13	9aabd17b-da8d-408d-b42d-2f3ed58a8056	1669596	68	2021-06-22	13:00	Clinic	False	False	False	High		No	27		Independent	False	False	False	False	False	False	False	False	False		False			False	False	False	False	TRUE	False	TRUE	False	False	False	False	False
	Epimed Monitor	General/Mixed	False	H1654	two	Public	Brazil	AGE2182	13	2b674566-afca-4ef8-84cb-136c8181f027	1669908	52	2021-06-22	21:30	Clinic	False	False	False	Death	Death	No	16	16	Independent	False	False	False	False	False	False	False	False	False		False			False	False	False	False	TRUE	False	False	False	False	TRUE	False	False
	Epimed Monitor	General/Mixed	False	H1654	two	Public	Brazil	AGE2182	13	dd2a65c8-4a57-4feb-b4a0-f372dc6be1c9	1669918	63	2021-06-23	00:40	Clinic	False	False	False	High		No	9		Independent	False	False	False	False	False	False	False	False	False		False			False	False	False	False	TRUE	False	False	TRUE	False	False	False	False
	Epimed Monitor	General/Mixed	False	H1654	two	Public	Brazil	AGE2182	13	d0bec5f0-d8a3-43e2-bcd7-14b46e4d652e	1669828	56	2021-06-23	10:30	Clinic	False	False	False	High		No	9		Independent	False	False	False	False	False	False	False	False	False		False			False	False	False	False	TRUE	False	TRUE	False	False	False	False	False
	Epimed Monitor	General/Mixed	False	H1654	two	Public	Brazil	AGE2182	13	d1211084-25ae-41fb-bd51-f05be2228900	1670078	22	2021-06-23	20:30	Clinic	False	False	False	High		No	35		Independent
	Epimed Monitor	General/Mixed	False	H1654	two	Public	Brazil	AGE2182	13	f3e78f6c-53ed-4332-b848-418a98f82e5b	1670472	42	2021-06-30	09:30	Clinic	False	False	False	Death	Death	No	12	14	Independent	False	False	False	False	False	False	False	False	False		False			False	False	False	False	False	False	False	False	False	False	False	False
	Epimed Monitor	General/Mixed	False	H1654	two	Public	Brazil	AGE2182	13	bab085cb-68b8-47d3-bfae-9f9f1be9e962	1670947	28	2021-07-01	02:00	Clinic	False	False	False	High		No	8		Independent	False	False	False	False	False	False	False	False	False		False			False	False	False	False	TRUE	False	False	False	False	False	False	False
	Epimed Monitor	General/Mixed	False	H1654	two	Public	Brazil	AGE2182	13	6d3f4288-5394-4823-a0c0-c5443848a560	1670777	64	2021-07-01	08:30	Clinic	False	False	False	Death	Death	No	19	21	Independent	False	False	False	False	False	False	False	False	False		False			False	False	False	False	TRUE	False	False	TRUE	False	False	False	False
	Epimed Monitor	General/Mixed	False	H1654	two	Public	Brazil	AGE2182	13	072528eb-de3d-4d8d-8234-311c0e5c9ecd	1670906	35	2021-07-01	11:00	Clinic	False	False	False	High		No	7		Independent
	Epimed Monitor	General/Mixed	False	H1654	two	Public	Brazil	AGE2182	13	9238d8d6-c592-4fb1-a9c5-5de998ee7fb9	1671103	45	2021-07-02	23:00	Clinic	False	False	False	High	Death	No	15	28	Independent
	Epimed Monitor	General/Mixed	False	H1654	two	Public	Brazil	AGE2182	13	67a5f1a4-1fc5-476a-9d34-a90a5efdc34d	1671183	49	2021-07-05	17:41	Clinic	False	False	False	High		No	36		Independent	False	False	False	False	False	False	False	False	False		False			False	False	False	False	TRUE	False	False	False	False	False	False	False
	Epimed Monitor	General/Mixed	False	H1654	two	Public	Brazil	AGE2182	13	e811803c-bb7c-4c1c-9672-06a0540e3346	1671517	42	2021-07-05	19:40	Clinic	False	False	False	High		No	14		Independent	False	False	False	False	False	False	False	False	False		False			False	False	False	False	False	False	TRUE	False	False	False	False	False
	Epimed Monitor	General/Mixed	False	H1654	two	Public	Brazil	AGE2182	13	b9264e89-fa9d-4d55-b498-2cb5f5d8a1d5	1670569	81	2021-07-06	17:00	Clinic	False	False	False	High		No	2		Independent	False	False	False	False	False	False	False	False	False		False			False	False	False	False	False	False	False	False	False	False	TRUE	False
	Epimed Monitor	General/Mixed	False	H1654	two	Public	Brazil	AGE2182	13	0c07f857-f28a-4322-8b13-5dbd5ac50d7f	1671761	37	2021-07-08	16:50	Clinic	False	False	False	High		No	6		Independent
	Epimed Monitor	General/Mixed	False	H1654	two	Public	Brazil	AGE2182	13	75b39678-67ff-42eb-b7ec-d0bb3b8bb38f	1671690	40	2021-07-08	22:00	Clinic	False	False	False	High	Death	No	28	29	Independent	False	False	False	False	False	False	False	False	False		False			False	False	False	False	TRUE	False	False	False	False	False	False	False
	Epimed Monitor	General/Mixed	False	H1654	two	Public	Brazil	AGE2182	13	61b732b3-5426-4c18-aabb-0c177c6ef145	1672995	65	2021-07-11	14:58	Clinic	False	False	False	High		No	18		Independent	False	False	False	False	False	False	False	False	False		False			False	False	False	False	TRUE	False	False	False	False	False	False	False
	Epimed Monitor	General/Mixed	False	H1654	two	Public	Brazil	AGE2182	13	ab079d49-26a2-434a-867e-d09e52a97fcd	1672255	50	2021-07-12	10:00 am	Clinic	False	False	False	Death	Death	No	5	5	Independent	False	False	False	False	False	False	False	False	False		False			False	False	False	False	TRUE	False	False	False	False	False	False	False
	Epimed Monitor	General/Mixed	False	H1654	two	Public	Brazil	AGE2182	13	9fa1b4d1-638d-4b6c-b4ba-a5572e5603cb	1672173	59	2021-07-13	10:00 am	Clinic	False	False	False	Death	Death	No	12	13	Independent	False	False	False	False	False	False	False	False	False		False			False	False	False	False	False	False	False	False	False	False	False	False
	Epimed Monitor	General/Mixed	False	H1654	two	Public	Brazil	AGE2182	13	d5f3a1f9-3079-4d5e-acf5-5a767aa93f56	186451	73	2021-07-15	21:00	Clinic	False	False	False	Death	Death	No	39	39	Independent	False	False	False	False	False	False	False	False	False		False			False	False	False	False	False	False	TRUE	False	False	False	False	False
	Epimed Monitor	General/Mixed	False	H1654	two	Public	Brazil	AGE2182	13	cd2e14f2-21ab-4e32-b716-cda4e6b51107	1672769	66	2021-07-16	17:30	Clinic	False	False	False	High		No	28		Independent	False	False	False	False	False	False	False	False	False		False			False	False	False	False	TRUE	False	False	False	False	False	False	False
	Epimed Monitor	General/Mixed	False	H1654	two	Public	Brazil	AGE2182	13	511bd45f-8feb-46ca-a8d3-34cb45a9ec65	784103	38	2021-07-17	14:32	Clinic	False	False	False	High		No	17		Independent
	Epimed Monitor	General/Mixed	False	H1654	two	Public	Brazil	AGE2182	13	9fa3812b-f26c-4894-8659-774119656c52	1672862	59	2021-07-20	00:30	Clinic	False	False	False	Death	Death	No	12	14	Independent	False	False	False	False	False	False	False	False	False		False			False	False	False	False	TRUE	False	False	False	False	False	False	False
	Epimed Monitor	General/Mixed	False	H1654	two	Public	Brazil	AGE2182	13	4385a808-d13a-4f78-be6b-1d129122b036	1673420	65	2021-07-22	05:00	Clinic	False	False	False	High		No	25		Independent	False	False	False	False	False	False	False	False	False		False			False	False	False	False	TRUE	False	TRUE	False	False	False	False	False
	Epimed Monitor	General/Mixed	False	H1654	two	Public	Brazil	AGE2182	13	f6561ce0-d709-4ae5-ae22-28b85db5fb43	1673606	53	2021-07-23	18:03	Clinic	False	False	False	Death	Death	No	21	21	Independent	False	False	False	False	False	False	False	False	False		False			False	False	False	False	False	False	False	False	False	False	False	False
	Epimed Monitor	General/Mixed	False	H1654	two	Public	Brazil	AGE2182	13	66e919e9-fcec-43aa-a015-2478d1a76758	1673171	43	2021-07-29	11:59	Clinic	False	False	False	High		No	4		Independent
	Epimed Monitor	General/Mixed	False	H1654	two	Public	Brazil	AGE2182	13	c5bd71dd-4742-4c6a-a6e7-47db12d7c122	1674227	41	2021-07-30	13:30	Clinic	False	False	False	High		No	13		Independent	False	False	False	False	False	False	False	False	False		False			False	False	False	False	False	TRUE	False	False	False	False	False	False
	Epimed Monitor	General/Mixed	False	H1654	two	Public	Brazil	AGE2182	13	fd3c8b3d-4bb9-4f10-934c-6d945174414a	1674835	83	2021-08-02	23:30	Clinic	False	False	False	High		No	8		Independent	TRUE	False	False	False	False	False	False	False	False		False			False	False	False	False	TRUE	False	False	False	False	False	False	False
	Epimed Monitor	General/Mixed	False	H1654	two	Public	Brazil	AGE2182	13	911477ae-0268-4500-8829-f7fc6b2ef1c2	1674915	41	2021-08-04	8:00 pm	Clinic	False	False	False	Death	Death	No	20	20	Independent	False	False	False	False	False	False	False	False	False		False			False	False	False	False	False	TRUE	False	False	False	False	False	False
	Epimed Monitor	General/Mixed	False	H1654	two	Public	Brazil	AGE2182	13	a20546a1-9fe3-403c-85e4-1ccccb72e6c2	1675475	72	2021-08-09	17:30	Clinic	False	False	False	High		No	5		Independent	False	False	False	False	False	False	False	False	False		False			False	False	False	False	TRUE	False	TRUE	False	False	False	False	False
	Epimed Monitor	General/Mixed	False	H1654	two	Public	Brazil	AGE2182	13	30cbd21a-f219-4053-a620-19052fa14224	786986	33	2021-08-13	11:16	Clinic	False	False	False	High		No	3		Independent
	Epimed Monitor	General/Mixed	False	H1654	two	Public	Brazil	AGE2182	13	b241bcee-1ec0-4062-977c-7e6724182b29	1676300	39	2021-08-14	15:00	Clinic	False	False	False	High	High	No	18	29	Independent	TRUE	False	False	False	False	False	False	False	False		False			False	False	False	False	TRUE	False	False	False	False	False	False	False
	Epimed Monitor	General/Mixed	False	H1654	two	Public	Brazil	AGE2182	13	b6d5527b-3757-4320-85c5-3fcff913e39b	1676332	58	2021-08-16	09:56	Clinic	False	False	False	Death	Death	No	17	18	Independent
	Epimed Monitor	General/Mixed	False	H1654	two	Public	Brazil	AGE2182	13	f22e5417-09b9-4953-b306-4942ca3b2a49	1148913	64	2021-08-29	18:27	Clinic	False	False	False			No	25		Independent
	Epimed Monitor	General/Mixed	False	H1654	two	Public	Brazil	AGE2680	17	81d7a3f4-5483-41bf-ad09-d2bda6502a9f	1089819	38	2020-08-07	14:00	Clinic	TRUE	False	False	High	High	No	17	30	Independent	False	False	TRUE	False	False	False	False	False	False		False			False	False	False	False	TRUE	False	False	False	False	False	False	False
	Epimed Monitor	General/Mixed	False	H1654	two	Public	Brazil	AGE2680	17	3f5c0009-c5d8-48a7-9a71-4af1f11cac8d	1638204	73	2020-08-15	12:40	Clinic	TRUE	False	False	High	High	No	1	6	Independent
	Epimed Monitor	General/Mixed	False	H1654	two	Public	Brazil	AGE2680	17	bbcee97a-2ed5-44ac-8330-f4a4b5e4fb4c	297138	50	2020-08-25	20:30	Clinic	False	False	False	High	High	No	5	6	Independent	False	False	False	False	False	False	False	False	False		False			False	False	False	False	TRUE	False	TRUE	False	False	False	False	False
	Epimed Monitor	General/Mixed	False	H1654	two	Public	Brazil	AGE2680	17	b7dccddb-b485-4944-ac5d-69a5872f17c0	209025	82	2020-09-01	09:42	Clinic	False	False	False	Death	Death	No	28	29	Need for assistance
	Epimed Monitor	General/Mixed	False	H1654	two	Public	Brazil	AGE2680	17	a0afd572-3dcf-4c46-8d1a-8c69ffa3b4e5	63608	71	2020-09-13	23:00	Clinic	False	False	False	High	High	No	37	46	Independent	False	False	False	False	False	False	False	False	False		False			False	False	False	False	TRUE	False	TRUE	False	False	False	False	False
	Epimed Monitor	General/Mixed	False	H1654	two	Public	Brazil	AGE2680	17	d04de70f-f363-4c8c-a779-6aa0bbada22a	1641774	42	2020-09-16	09:00	Clinic	False	False	False	High	High	No	1	18	Independent
	Epimed Monitor	General/Mixed	False	H1654	two	Public	Brazil	AGE2680	17	5bf26215-c360-40f3-856b-37adf9c179ff	1095133	67	2020-10-06	16:30	Clinic	False	False	False	Death	Death	No	28	28	Need for assistance	False	False	False	False	False	False	False	False	False		False			False	False	False	False	TRUE	False	False	False	False	False	False	False
	Epimed Monitor	General/Mixed	False	H1654	two	Public	Brazil	AGE2680	17	4279183e-ba3a-41c7-ad22-01e343d7c8eb	814113	62	2020-10-11	02:17	Clinic	False	False	False	High	Death	No	8	9	Restricted/bed-bound	False	False	False	False	False	False	False	False	False		False			False	False	False	False	TRUE	False	TRUE	False	False	False	False	False
	Epimed Monitor	General/Mixed	False	H1654	two	Public	Brazil	AGE2680	17	4279183e-ba3a-41c7-ad22-01e343d7c8eb	814113	62	2020-10-11	8:00 pm	Clinic	False	False	False	High	Death	No	8	9	Independent	False	False	False	False	False	False	False	False	False		False			False	False	False	False	TRUE	False	TRUE	False	False	False	False	False
	Epimed Monitor	General/Mixed	False	H1654	two	Public	Brazil	AGE2680	17	6f0fa0f9-6505-4474-945c-61bfd6f77a88	1096881	65	2020-10-27	8:00 pm	Clinic	False	False	False	High	Death	No	2	20	Independent	False	False	False	False	False	False	False	False	False		False			False	False	False	False	False	False	False	False	False	False	False	False
	Epimed Monitor	General/Mixed	False	H1654	two	Public	Brazil	AGE2680	17	9e14516d-32d0-4da7-addc-9d11492222e6	2643595	85	2020-10-29	18:30	Clinic	False	False	False	Death	Death	No	11	11	Restricted/bed-bound	False	False	False	False	False	False	False	False	False		False			False	False	False	False	TRUE	False	False	False	False	False	False	False
	Epimed Monitor	General/Mixed	False	H1654	two	Public	Brazil	AGE2680	17	7bf375eb-f660-4019-9a0c-d993adb27e86	178993	77	2020-10-31	23:58	Clinic	False	False	False	Death	Death	No	4	4	Need for assistance	False	False	False	False	False	False	False	False	False		False			False	False	False	False	TRUE	False	False	False	False	False	False	False
	Epimed Monitor	General/Mixed	False	H1654	two	Public	Brazil	AGE2680	17	81db218d-feeb-4d40-940f-fa5897d2368e	44710	73	2020-11-03	16:36	Clinic	False	False	False	Death	Death	No	22	22	Independent	False	False	False	False	False	False	False	False	False		TRUE	99	Others	False	False	False	False	False	False	False	TRUE	False	False	False	False
	Epimed Monitor	General/Mixed	False	H1654	two	Public	Brazil	AGE2680	17	5120088a-11d2-4237-9f2a-b98efc48a760	1646418	73	2020-11-08	15:15	Clinic	False	False	False	High	Death	No	11	61	Need for assistance	False	False	False	False	False	False	False	False	False		False			False	False	False	False	False	False	False	False	False	False	False	False
	Epimed Monitor	General/Mixed	False	H1654	two	Public	Brazil	AGE2680	17	7d9e3046-9986-4c1f-9cdb-ca012c4057d5	130251	73	2020-11-09	8:00 pm	Clinic	False	False	False	High	High	No	4	25	Need for assistance	False	False	False	False	False	False	False	False	False		False			False	False	False	False	TRUE	False	TRUE	False	False	False	False	False
	Epimed Monitor	General/Mixed	False	H1654	two	Public	Brazil	AGE2680	17	db5b00ba-b954-4a4b-ba3d-a55fb192aab6	261246	75	2020-11-12	21:00	Clinic	False	False	False	Death	Death	No	15	15	Independent	False	False	False	False	False	False	False	False	False		False			False	False	False	False	TRUE	False	False	False	False	False	False	False
	Epimed Monitor	General/Mixed	False	H1654	two	Public	Brazil	AGE2680	17	6e2f7e4b-1f3f-46c8-9904-579670b02405	40788	48	2020-11-20	15:30	Clinic	False	False	False	Death	Death	No	6	6	Independent	False	False	False	False	False	False	False	False	False		False			False	TRUE	False	False	TRUE	False	False	False	False	False	False	False
	Epimed Monitor	General/Mixed	False	H1654	two	Public	Brazil	AGE2680	17	ce504081-a4a3-406a-804d-6f4706877d85	1648115	62	2020-11-25	18:36	Clinic	False	False	False	Death	Death	No	1	1	Independent	False	False	False	False	False	False	False	False	False		False			False	False	False	False	TRUE	False	False	False	False	False	False	False
	Epimed Monitor	General/Mixed	False	H1654	two	Public	Brazil	AGE2680	17	43086231-8012-4e31-b678-22289af117bc	1648085	75	2020-11-25	23:00	Clinic	False	False	False	Death	Death	No	10	10	Independent	TRUE	False	False	False	False	False	False	False	False		False			False	False	False	False	TRUE	False	False	TRUE	False	TRUE	False	False
	Epimed Monitor	General/Mixed	False	H1654	two	Public	Brazil	AGE2680	17	c9ee927b-37fc-4fe1-bc2c-42500dce41ac	1647978	53	2020-11-26	09:00	Clinic	False	False	False	Death	Death	No	7	9	Independent	False	False	False	False	False	False	False	False	False		False			False	False	False	False	False	False	False	False	False	False	False	False
	Epimed Monitor	General/Mixed	False	H1654	two	Public	Brazil	AGE2680	17	50947e71-4249-471f-ba77-d15af6d4bb16	1648327	66	2020-11-27	09:55	Clinic	False	False	False	Death	Death	No	9	11	Independent	False	False	False	False	False	False	False	False	False		False			False	False	False	False	False	False	False	False	False	False	False	False
	Epimed Monitor	General/Mixed	False	H1654	two	Public	Brazil	AGE2680	17	7d19f2c9-0f9a-48a8-a0a6-100c6aaba0a5	1648164	35	2020-11-28	19:00	Clinic	False	False	False	Death	Death	No	30	32	Independent	False	False	False	False	False	False	False	False	False		False			False	False	False	False	TRUE	False	False	False	False	False	False	False
	Epimed Monitor	General/Mixed	False	H1654	two	Public	Brazil	AGE2680	17	2def2ddc-1f43-459e-a50c-0acc469c04ec	1648392	60	2020-11-28	19:10	Clinic	False	False	False	Death	Death	No	7	7	Independent	False	False	False	False	False	False	False	False	False		False			False	False	False	False	TRUE	False	False	TRUE	False	False	False	False
	Epimed Monitor	General/Mixed	False	H1654	two	Public	Brazil	AGE2680	17	50928624-e3d5-400e-9d1e-7dfdc48aa845	1648356	66	2020-11-28	21:15	Clinic	False	False	False	Death	Death	No	42	42	Independent	False	False	False	False	False	False	False	False	False		False			False	False	False	False	False	False	False	False	False	False	False	False
	Epimed Monitor	General/Mixed	False	H1654	two	Public	Brazil	AGE2680	17	ac865797-3c4a-416d-bc8e-29edd4c3ea7d	1648488	71	2020-11-30	23:30	Clinic	False	False	False	Death	Death	No	8	8	Independent	False	False	False	False	False	False	False	False	False		False			False	TRUE	False	False	TRUE	False	TRUE	False	False	False	False	False
	Epimed Monitor	General/Mixed	False	H1654	two	Public	Brazil	AGE2680	17	16f49a65-7119-40ce-8288-197d6489fd23	1648696	80	2020-12-02	18:30	Clinic	False	False	False	Death	Death	No	6	6	Need for assistance	False	False	False	False	False	False	False	False	False		False			False	False	False	False	TRUE	False	False	False	False	False	False	False
	Epimed Monitor	General/Mixed	False	H1654	two	Public	Brazil	AGE2680	17	e9dfef99-d86d-44b3-93f3-b2f1b269897c	150308	82	2020-12-04	13:31	Clinic	False	False	False	Death	Death	No	3	13	Independent	False	False	False	False	False	False	False	False	False		False			False	False	False	False	TRUE	False	False	False	False	False	False	False
	Epimed Monitor	General/Mixed	False	H1654	two	Public	Brazil	AGE2680	17	d666911e-aa2f-4551-8658-aeadfb3d3e24	1648881	85	2020-12-05	22:40	Clinic	False	False	False	Death	Death	No	8	8	Independent	False	False	TRUE	False	False	False	False	False	False		False			False	False	False	False	TRUE	False	False	False	False	False	False	False
	Epimed Monitor	General/Mixed	False	H1654	two	Public	Brazil	AGE2680	17	5785ee4b-2101-4b56-bf17-e9880c7b5d6f	1648875	74	2020-12-06	15:00	Clinic	False	False	False	Death	Death	No	3	4	Independent	False	False	False	False	False	False	False	False	False		False			False	False	False	False	TRUE	False	False	TRUE	False	False	False	False
	Epimed Monitor	General/Mixed	False	H1654	two	Public	Brazil	AGE2680	17	c564586a-b317-4ff1-97c9-787a68a8b350	855959	69	2020-12-08	10:30	Clinic	False	False	False	Death	Death	No	7	7	Independent	False	False	False	False	False	False	False	False	False		False			False	False	False	False	TRUE	False	False	False	False	False	False	False
	Epimed Monitor	General/Mixed	False	H1654	two	Public	Brazil	AGE2680	17	f29996d0-a983-40b7-ac5c-e100b39d2dba	1649113	74	2020-12-08	14:45	Clinic	False	False	False	Death	Death	No	4	4	Need for assistance	False	False	False	False	False	False	False	False	False		False			False	TRUE	False	False	False	False	False	False	False	False	False	False
	Epimed Monitor	General/Mixed	False	H1654	two	Public	Brazil	AGE2680	17	8674cfa0-c8ae-4225-b930-290f12b70aa7	1648877	71	2020-12-08	15:00	Clinic	False	False	False	Death	Death	No	23	26	Independent	False	False	False	False	False	False	False	False	False		False			False	False	False	False	TRUE	False	TRUE	False	False	False	False	False
	Epimed Monitor	General/Mixed	False	H1654	two	Public	Brazil	AGE2680	17	056a2fdd-a55b-4fa7-8402-3e7614f57e3b	1649034	76	2020-12-10	09:00	Clinic	False	False	False	Death	Death	No	11	14	Independent	False	False	False	False	False	False	False	False	False		False			False	TRUE	False	False	False	False	False	False	False	False	False	False
	Epimed Monitor	General/Mixed	False	H1654	two	Public	Brazil	AGE2680	17	fd042343-7aaa-44d4-86d8-3add53c73f44	1649132	33	2020-12-12	03:00	Clinic	False	False	False	Death	Death	No	5	9	Independent	False	False	False	False	False	False	False	False	False		False			TRUE	False	False	TRUE	False	False	False	False	False	False	False	False
	Epimed Monitor	General/Mixed	False	H1654	two	Public	Brazil	AGE2680	17	4de4454c-825d-4df5-adb9-e66ba4474171	1648921	56	2020-12-15	13:00	Clinic	False	False	False	Death	Death	No	8	17	Independent
	Epimed Monitor	General/Mixed	False	H1654	two	Public	Brazil	AGE2680	17	82a838f4-ab0b-4adf-a6c1-c49ccb1758f6	1649227	70	2020-12-16	12:00 pm	Clinic	False	False	False	Death	Death	No	1	7	Independent	TRUE	False	False	False	False	False	False	False	False		False			False	False	False	False	TRUE	False	False	TRUE	False	TRUE	False	False
	Epimed Monitor	General/Mixed	False	H1654	two	Public	Brazil	AGE2680	17	36eb0cd9-2536-4592-aa01-41c61a70fdca	1649775	69	2020-12-16	15:00	Clinic	False	False	False	High	Death	No	4	11	Independent	False	False	False	False	False	False	False	False	False		TRUE	2	Leukemia	False	False	False	False	False	False	False	False	False	False	False	False
	Epimed Monitor	General/Mixed	False	H1654	two	Public	Brazil	AGE2680	17	a2977f33-c155-45e7-b1cd-6440e7bedcf2	1649773	73	2020-12-17	15:00	Clinic	False	False	False	Death	Death	No	12	13	Independent	False	False	False	False	False	False	False	False	False		False			False	False	False	False	False	TRUE	False	False	False	False	False	False
	Epimed Monitor	General/Mixed	False	H1654	two	Public	Brazil	AGE2680	17	eb8a9db2-ca05-4f9e-8b29-3cffcf991f51	81129	54	2020-12-17	18:20	Clinic	False	False	False	Death	Death	No	27	27	Independent	False	False	False	False	False	False	False	False	False		False			False	False	False	False	TRUE	False	TRUE	False	False	False	False	False
	Epimed Monitor	General/Mixed	False	H1654	two	Public	Brazil	AGE2680	17	8fc4ffe5-359e-4d30-ad9c-18a8709e46be	1649462	41	2020-12-18	17:30	Clinic	False	False	False	High	High	No	25	133	Independent	False	False	False	False	False	False	False	False	False		False			False	False	False	False	False	False	False	False	False	False	False	False
	Epimed Monitor	General/Mixed	False	H1654	two	Public	Brazil	AGE2680	17	39322933-f349-4e42-a749-095ce217c65d	1649779	82	2020-12-18	8:00 pm	Clinic	False	False	False	Death	Death	No	14	16	Independent	TRUE	False	False	False	False	False	False	False	False		False			False	False	False	False	TRUE	False	False	False	False	False	False	False
	Epimed Monitor	General/Mixed	False	H1654	two	Public	Brazil	AGE2680	17	ac68f6c9-7e45-48e3-b19a-9a0d4f5ade3f	1649852	59	2020-12-19	20:30	Clinic	False	False	False	Death	Death	No	32	34	Independent	False	False	False	False	False	False	False	False	False		False			False	False	False	False	False	False	TRUE	False	False	False	False	False
	Epimed Monitor	General/Mixed	False	H1654	two	Public	Brazil	AGE2680	17	ac19c3a4-9ecf-4e09-bd1e-1ecdf7e6c4e9	1649530	57	2020-12-19	22:00	Clinic	False	False	False	Death	Death	No	11	18	Independent	False	False	False	False	False	False	False	TRUE	False	Large intestine/anal canal	False			TRUE	False	False	False	TRUE	False	False	False	False	False	False	False
	Epimed Monitor	General/Mixed	False	H1654	two	Public	Brazil	AGE2680	17	b722abd2-3459-44c8-ab51-51a7147effd8	428429	80	2020-12-22	22:00	Clinic	False	False	False	Death	Death	No	5	12	Need for assistance	False	False	False	False	False	False	False	False	False		False			False	TRUE	False	False	TRUE	False	False	False	False	False	False	False
	Epimed Monitor	General/Mixed	False	H1654	two	Public	Brazil	AGE2680	17	b5c9525d-3b08-4fc1-b90f-917cf6abd983	1649758	85	2020-12-23	12:00 pm	Clinic	False	False	False	Death	Death	No	3	10	Independent	False	False	False	False	False	False	False	False	False		False			False	False	False	False	TRUE	False	False	False	False	False	False	False
	Epimed Monitor	General/Mixed	False	H1654	two	Public	Brazil	AGE2680	17	b8c08717-7fb9-4c27-aa0d-7bdfac574c91	1650222	54	2020-12-26	15:08	Clinic	False	False	False	Death	Death	No	17	21	Independent	False	False	False	False	False	False	False	False	False		False			False	False	False	False	False	False	False	False	False	False	False	False
	Epimed Monitor	General/Mixed	False	H1654	two	Public	Brazil	AGE2680	17	df5bc5b4-2081-480b-88ea-add537ff6407	157368	73	2020-12-30	09:00	Clinic	False	False	False	Death	Death	No	6	10	Independent	False	False	False	False	False	False	False	False	False		False			False	TRUE	False	False	TRUE	False	TRUE	False	False	False	False	False
	Epimed Monitor	General/Mixed	False	H1654	two	Public	Brazil	AGE2680	17	7ada5ab5-49d0-4896-baab-623e580417c5	1650776	72	2020-12-30	22:00	Clinic	False	False	False	Death	Death	No	13	13	Independent	False	False	False	False	False	False	False	False	False		False			False	False	False	False	False	False	False	False	False	False	False	False
	Epimed Monitor	General/Mixed	False	H1654	two	Public	Brazil	AGE2680	17	5d3d1f8f-110f-4b09-86cf-e3afa0f77f76	1649927	66	2020-12-31	02:00	Clinic	False	False	False	High	High	No	6	28	Independent	TRUE	False	False	False	False	False	False	False	False		False			False	TRUE	False	False	TRUE	False	False	False	False	False	False	False
	Epimed Monitor	General/Mixed	False	H1654	two	Public	Brazil	AGE2680	17	adf6ac7a-051f-4977-a5a6-bde8237bebfc	1650775	69	2020-12-31	8 o'clock	Clinic	False	False	False	Death	Death	No	5	6	Independent	TRUE	False	False	False	TRUE	False	False	False	False		False			False	False	False	False	TRUE	False	False	TRUE	False	False	False	False
	Epimed Monitor	General/Mixed	False	H1654	two	Public	Brazil	AGE2680	17	d19cb61a-942b-4d07-b67d-55f747ce8025	1651462	85	2021-01-09	22:00	Clinic	False	False	False	Death	Death	No	13	14	Restricted/bed-bound	False	False	False	False	False	False	False	False	False		False			False	False	False	False	TRUE	False	TRUE	False	False	False	False	False
	Epimed Monitor	General/Mixed	False	H1654	two	Public	Brazil	AGE2680	17	8eab2701-081d-4a3d-9231-c3a531411ba3	1651738	65	2021-01-12	23:30	Clinic	False	False	False	High	High	No	4	10	Independent
	Epimed Monitor	General/Mixed	False	H1654	two	Public	Brazil	AGE2680	17	8080d1d2-045e-4a37-9b86-882dc138a793	179107	71	2021-01-13	10:00 am	Clinic	False	False	False	High	High	No	1	5	Independent
	Epimed Monitor	General/Mixed	False	H1654	two	Public	Brazil	AGE2680	17	98a910be-ab8c-493b-b05e-5846817b2b37	1651511	84	2021-01-14	12:00 pm	Clinic	False	False	False	Death	Death	No	1	4	Independent	TRUE	False	TRUE	False	False	False	False	False	False		False			False	False	False	False	TRUE	False	False	TRUE	False	False	False	False
	Epimed Monitor	General/Mixed	False	H1654	two	Public	Brazil	AGE2680	17	af08da53-9168-403a-8da6-b90b06483818	1651559	70	2021-01-14	17:00	Clinic	False	False	False	Death	Death	No	12	15	Independent	False	False	False	False	False	False	False	False	False		False			False	False	False	False	TRUE	False	False	False	False	False	False	False
	Epimed Monitor	General/Mixed	False	H1654	two	Public	Brazil	AGE2680	17	e4181ef2-ef2c-4323-8b9b-344826b7fcb0	1651956	86	2021-01-14	22:45	Clinic	False	False	False	Death	Death	No	1	1	Independent	False	False	False	False	False	False	False	False	False		False			False	TRUE	False	False	False	False	False	False	False	False	TRUE	False
	Epimed Monitor	General/Mixed	False	H1654	two	Public	Brazil	AGE2680	17	eaa8a6b9-7848-4e0c-87f7-13634ff5cf8c	676842	83	2021-01-15	10:30	Clinic	False	False	False	High	High	No	29	37	Independent	False	False	False	False	False	False	False	False	False		False			False	False	False	False	TRUE	False	False	TRUE	False	False	False	False
	Epimed Monitor	General/Mixed	False	H1654	two	Public	Brazil	AGE2680	17	9d27cb15-68f2-4c51-ab4d-730f5e7375f3	1105286	48	2021-01-15	13:00	Clinic	False	False	False	Death	Death	No	21	21	Independent	False	False	False	False	False	False	False	False	False		False			False	False	False	False	False	False	False	False	False	False	False	False
	Epimed Monitor	General/Mixed	False	H1654	two	Public	Brazil	AGE2680	17	798dc0af-7137-499d-92c5-f4bef48782f4	61536	64	2021-01-17	12:00 pm	Clinic	False	False	False	Death	Death	No	4	4	Independent	False	False	False	False	False	False	False	False	False		False			False	False	False	False	TRUE	False	False	TRUE	False	TRUE	False	False
	Epimed Monitor	General/Mixed	False	H1654	two	Public	Brazil	AGE2680	17	26ba9372-c585-40fb-8d9e-ad832c10cb31	1652097	89	2021-01-17	8:00 pm	Clinic	False	False	False	Death	Death	No	14	14	Independent	False	False	False	False	False	False	False	False	False		False			False	False	False	False	TRUE	False	False	False	False	False	False	False
	Epimed Monitor	General/Mixed	False	H1654	two	Public	Brazil	AGE2680	17	ab1529f3-02b2-4e49-96a3-f91c9a64e5e0	1652222	67	2021-01-19	02:00	Clinic	False	False	False	High	High	No	3	5	Independent	False	False	TRUE	False	False	False	False	False	False		False			False	False	False	False	TRUE	False	TRUE	False	TRUE	False	False	False
	Epimed Monitor	General/Mixed	False	H1654	two	Public	Brazil	AGE2680	17	5603daff-649f-4cd1-8233-62d4cfd2d9f4	339849	88	2021-01-21	22:00	Clinic	False	False	False	Death	Death	No	12	13	Independent	False	False	False	False	False	False	False	False	False		False			False	False	False	False	TRUE	False	TRUE	False	False	False	False	False
	Epimed Monitor	General/Mixed	False	H1654	two	Public	Brazil	AGE2680	17	1e86c0b5-86b2-426a-8c71-bd1f127ced70	1652696	75	2021-01-22	18:20	Clinic	False	False	False	Death	Death	No	1	1	Independent	False	False	TRUE	False	False	False	False	False	False		False			False	False	False	False	TRUE	False	False	TRUE	False	False	False	False
	Epimed Monitor	General/Mixed	False	H1654	two	Public	Brazil	AGE2680	17	69560bf5-6a35-4bc5-8d31-900a7a6a8128	333515	69	2021-01-23	8 o'clock	Clinic	False	False	False	High	Death	No	3	19	Need for assistance	False	False	False	False	False	False	False	False	False		False			False	False	False	False	TRUE	False	TRUE	False	False	False	False	False
	Epimed Monitor	General/Mixed	False	H1654	two	Public	Brazil	AGE2680	17	e69fb6d0-dd76-41d8-a746-9e53d0374483	1106006	69	2021-01-23	13:00	Clinic	False	False	False	Death	Death	No	8	8	Independent	TRUE	False	TRUE	False	False	False	False	False	False		False			False	False	False	False	False	False	False	False	False	False	False	False
	Epimed Monitor	General/Mixed	False	H1654	two	Public	Brazil	AGE2680	17	592f1c89-ad91-4e1c-bc0e-60d9167b3dad	567205	63	2021-01-23	22:00	Clinic	False	False	False	Death	Death	No	25	32	Independent	False	False	False	False	False	False	False	False	False		False			False	False	False	False	TRUE	False	TRUE	False	False	False	False	False
	Epimed Monitor	General/Mixed	False	H1654	two	Public	Brazil	AGE2680	17	6c410661-69e9-45b6-802d-ee714061e719	111236	84	2021-01-24	10:00 am	Clinic	False	False	False	High	High	No	2	6	Need for assistance	False	False	False	False	False	False	False	False	False		False			False	False	False	False	TRUE	False	TRUE	False	False	False	False	False
	Epimed Monitor	General/Mixed	False	H1654	two	Public	Brazil	AGE2680	17	71df10b1-d952-470a-b385-c986d56e6208	1652587	94	2021-01-25	11:00	Clinic	False	False	False	Death	Death	Yeah, don't step up	4	374	Independent	TRUE	False	False	False	False	False	False	False	False		False			False	False	False	False	TRUE	False	TRUE	False	False	False	False	False
	Epimed Monitor	General/Mixed	False	H1654	two	Public	Brazil	AGE2680	17	911af655-0df1-465e-a2d7-da264a01f530	1652821	58	2021-01-25	14:40	Clinic	False	False	False	High	Death	No	3	21	Independent	False	False	False	False	False	False	False	False	False		False			False	False	False	False	TRUE	False	False	False	False	False	False	False
	Epimed Monitor	General/Mixed	False	H1654	two	Public	Brazil	AGE2680	17	b3ae31ff-84a0-407f-9328-efd72c89bc93	1652908	64	2021-01-26	17:00	Clinic	False	False	False	Death	Death	No	28	28	Need for assistance	False	False	False	False	False	False	False	False	False		False			False	False	False	False	TRUE	False	TRUE	False	False	False	False	False
	Epimed Monitor	General/Mixed	False	H1654	two	Public	Brazil	AGE2680	17	7e6f7f1e-6f84-4331-9d5a-41d591293f6e	1653219	83	2021-01-30	11:00	Clinic	False	False	False	Death	Death	No	15	16	Need for assistance	False	False	False	False	False	False	False	False	False		False			False	False	False	False	TRUE	False	False	False	False	False	False	False
	Epimed Monitor	General/Mixed	False	H1654	two	Public	Brazil	AGE2680	17	a6aa9cab-6e10-4380-a3e2-1a82a0eddcf3	752793	75	2021-01-30	14:30	Clinic	False	False	False	High	High	No	6	13	Need for assistance	False	False	False	False	False	False	False	False	False		False			False	False	False	False	TRUE	False	TRUE	False	False	TRUE	False	False
	Epimed Monitor	General/Mixed	False	H1654	two	Public	Brazil	AGE2680	17	22ab651f-e2ba-4e90-9672-a4e041751cd5	1653248	41	2021-01-31	20:30	Clinic	False	False	False	High	High	No	15	20	Independent	False	False	False	False	False	False	False	False	False		False			False	False	False	False	False	False	False	False	False	False	False	False
	Epimed Monitor	General/Mixed	False	H1654	two	Public	Brazil	AGE2680	17	67d9f49c-c8df-4eb7-b15a-bf4a8d157d05	1653390	72	2021-02-01	15:45	Clinic	False	False	False	Death	Death	No	15	15	Independent	False	False	False	False	False	False	False	False	False		False			TRUE	False	False	False	TRUE	False	False	TRUE	False	False	False	False
	Epimed Monitor	General/Mixed	False	H1654	two	Public	Brazil	AGE2680	17	d839cbbb-0d3e-4391-b4a8-a4b6a42b4fac	1653671	82	2021-02-03	23:50	Clinic	False	False	False	Death	Death	No	14	14	Need for assistance	False	False	False	False	False	False	False	False	False		False			False	False	False	False	TRUE	False	False	False	False	False	False	False
	Epimed Monitor	General/Mixed	False	H1654	two	Public	Brazil	AGE2680	17	ba70b0e5-4584-4504-8730-ec73c3218314	1653761	40	2021-02-04	13:40	Clinic	False	False	False	Death	Death	No	5	5	Independent
	Epimed Monitor	General/Mixed	False	H1654	two	Public	Brazil	AGE2680	17	960faa79-5a84-44c7-bcad-89b978524f49	1653954	67	2021-02-06	8:00 pm	Clinic	False	False	False	High	High	No	14	19	Independent	False	False	False	False	False	False	False	False	False		False			False	False	False	False	TRUE	TRUE	False	False	False	False	False	False
	Epimed Monitor	General/Mixed	False	H1654	two	Public	Brazil	AGE2680	17	0403f20b-1288-4b02-a90c-47239cf8ef89	1653410	72	2021-02-08	10:30	Clinic	False	False	False	Death	Death	Yeah, don't step up	2	9	Restricted/bed-bound	False	False	False	False	False	False	False	False	False		False			False	False	False	False	TRUE	False	False	False	False	False	False	False
	Epimed Monitor	General/Mixed	False	H1654	two	Public	Brazil	AGE2680	17	f55cf9d8-7300-4a55-b1eb-ae564adf3447	1654095	73	2021-02-09	08:30	Clinic	False	False	False	Death	Death	No	21	22	Need for assistance	False	False	TRUE	False	False	False	False	False	False		False			False	False	False	False	TRUE	False	TRUE	False	False	False	False	False
	Epimed Monitor	General/Mixed	False	H1654	two	Public	Brazil	AGE2680	17	03df5a1b-e173-414b-be6b-9d72609e6af7	755566	62	2021-02-09	4:00 pm	Clinic	False	False	False	Death	Death	No	13	13	Restricted/bed-bound	False	False	False	False	False	False	False	False	False		False			False	False	False	False	False	False	TRUE	False	False	False	False	False
	Epimed Monitor	General/Mixed	False	H1654	two	Public	Brazil	AGE2680	17	2bb2a7de-5fdf-4455-a0dc-d0359e86a58b	1654234	64	2021-02-10	15:44	Clinic	False	False	False	Death	Death	No	8	9
	Epimed Monitor	General/Mixed	False	H1654	two	Public	Brazil	AGE2680	17	234debec-1fcc-44cb-8585-f6638f3a991a	1654246	72	2021-02-12	12:30	Clinic	False	False	False	Death	Death	No	11	14
	Epimed Monitor	General/Mixed	False	H1654	two	Public	Brazil	AGE2680	17	8f0a643b-17cd-4fff-8182-6434d3587a99	1653665	90	2021-02-12	17:30	Clinic	False	False	False	Death	Death	No	2	11	Independent	False	False	False	False	False	False	False	False	False		False			False	TRUE	False	False	TRUE	False	False	False	False	False	False	False
	Epimed Monitor	General/Mixed	False	H1654	two	Public	Brazil	AGE2680	17	ee7badf2-0b33-46a2-abe2-d32eb50b7972	1654112	60	2021-02-13	16:30	Clinic	False	False	False	Death	Death	No	10	15
	Epimed Monitor	General/Mixed	False	H1654	two	Public	Brazil	AGE2680	17	c4ad10b1-7b4a-4935-b45f-7636ec585a1f	1654250	55	2021-02-14	21:00	Clinic	False	False	False	Death	Death	No	21	26	Independent
	Epimed Monitor	General/Mixed	False	H1654	two	Public	Brazil	AGE2680	17	c748d9b2-8711-405b-9980-b0c8057402a5	1654570	34	2021-02-15	23:00	Clinic	False	False	False	Death	Death	No	7	11
	Epimed Monitor	General/Mixed	False	H1654	two	Public	Brazil	AGE2680	17	12f9d5b5-e120-4cd5-9957-87e3d42e702f	1655006	77	2021-02-17	18:50	Clinic	False	False	False	Death	Death	No	9	9
	Epimed Monitor	General/Mixed	False	H1654	two	Public	Brazil	AGE2680	17	b43a74f0-385d-4abc-baef-eed6af43eab2	1654718	40	2021-02-18	15:30	Clinic	False	False	False	Death	Death	No	11	17	Independent
	Epimed Monitor	General/Mixed	False	H1654	two	Public	Brazil	AGE2680	17	6365ec3a-bc7f-4750-a203-543307ff9a2f	1653457	46	2021-02-19	18:00	Clinic	TRUE	False	False	Death	Death	No	13	30	Restricted/bed-bound
	Epimed Monitor	General/Mixed	False	H1654	two	Public	Brazil	AGE2680	17	20b8c2b7-776d-4c8a-ba6c-91e399748ffb	1655515	54	2021-02-21	09:00	Clinic	False	False	False	Death	Death	No	29	31	Independent
	Epimed Monitor	General/Mixed	False	H1654	two	Public	Brazil	AGE2680	17	e1faaa1e-16f9-4ba7-82e7-d56868496e23	1655721	63	2021-02-22	15:40	Clinic	False	False	False	Death	Death	No	17	17	Independent	False	False	False	False	False	False	False	False	False		False			False	False	False	False	False	False	False	False	False	False	False	False
	Epimed Monitor	General/Mixed	False	H1654	two	Public	Brazil	AGE2680	17	a10c1cfc-e83e-4518-aa8a-56fc35944fb2	1655720	67	2021-02-22	18:00	Clinic	False	False	False	High	High	No	7	7
	Epimed Monitor	General/Mixed	False	H1654	two	Public	Brazil	AGE2680	17	391cf0f5-f811-4aff-98f2-e8dd665c8776	1654745	75	2021-02-23	01:30	Clinic	False	False	False	Death	Death	No	3	12	Independent	TRUE	False	TRUE	False	False	False	False	False	False		False			False	False	False	False	TRUE	False	False	False	False	False	False	False
	Epimed Monitor	General/Mixed	False	H1654	two	Public	Brazil	AGE2680	17	04b127cc-4152-4610-a1e0-8e31f4dcc169	1655567	65	2021-02-23	15:00	Clinic	False	False	False	Death	Death	No	6	8	Independent	TRUE	False	False	False	False	False	False	False	False		False			False	False	False	False	TRUE	False	False	TRUE	False	False	False	False
	Epimed Monitor	General/Mixed	False	H1654	two	Public	Brazil	AGE2680	17	992ba451-1632-4580-8c83-40aa176bb695	16560003	34	2021-02-24	4:00 pm	Clinic	False	False	False	Death	Death	No	7	7	Independent	False	False	False	False	False	False	False	False	False		False			False	False	False	False	False	False	False	False	False	False	False	False
	Epimed Monitor	General/Mixed	False	H1654	two	Public	Brazil	AGE2680	17	7ccc0112-dec4-418e-a888-23e3e9ce307a	1655141	55	2021-02-26	10:30	Clinic	False	False	False	Death	Death	No	5	14	Independent
	Epimed Monitor	General/Mixed	False	H1654	two	Public	Brazil	AGE2680	17	505b2662-2168-41ed-96df-f6681a02e19f	1656289	48	2021-02-26	20:30	Clinic	False	False	False	Death	Death	No	11	11	Independent
	Epimed Monitor	General/Mixed	False	H1654	two	Public	Brazil	AGE2680	17	0aa13192-546d-400a-a404-d5f56a5c6a35	1656299	77	2021-02-27	00:45	Clinic	False	False	False	Death	Death	Yes, limit	18	18	Independent	False	False	False	False	False	False	False	False	False		False			False	False	False	False	TRUE	False	TRUE	False	False	False	False	False
	Epimed Monitor	General/Mixed	False	H1654	two	Public	Brazil	AGE2680	17	a5591ca6-4131-420d-b809-af48ef268343	1655718	82	2021-02-27	4:00 pm	Clinic	False	False	False	Death	Death	No	7	12	Independent	False	False	False	False	False	False	False	False	False		False			False	False	False	False	TRUE	False	False	False	False	False	False	False
	Epimed Monitor	General/Mixed	False	H1654	two	Public	Brazil	AGE2680	17	0f289c55-a0e9-4c6a-9776-e668b65b2611	1656326	51	2021-02-28	12:00 pm	Clinic	False	False	False	Death	Death	No	12	12	Independent
	Epimed Monitor	General/Mixed	False	H1654	two	Public	Brazil	AGE2680	17	4e34b7cf-f11b-48a0-87b2-fc32fc5ca87e	1656471	65	2021-03-01	19:15	Clinic	False	False	False	High	High	No	8	21	Independent	False	False	False	False	False	False	False	False	False		False			False	False	False	False	TRUE	False	TRUE	False	False	False	False	False
	Epimed Monitor	General/Mixed	False	H1654	two	Public	Brazil	AGE2680	17	b0cdc430-ff89-4c80-9912-3c35c15179d6	1656564	71	2021-03-02	14:15	Clinic	False	False	False	Death	Death	No	9	9	Independent	False	False	False	False	False	False	False	False	False		False			False	False	False	False	TRUE	False	False	False	False	False	False	False
	Epimed Monitor	General/Mixed	False	H1654	two	Public	Brazil	AGE2680	17	302062f0-0b37-496a-9199-86cd2ceef743	1656482	55	2021-03-02	17:30	Clinic	False	False	False	Death	Death	No	10	10	Independent	False	False	False	False	False	False	False	False	False		False			False	False	False	False	TRUE	False	False	False	False	False	False	False
	Epimed Monitor	General/Mixed	False	H1654	two	Public	Brazil	AGE2680	17	499f0608-9e1d-45dc-870f-337e379f3501	1656591	51	2021-03-02	21:30	Clinic	False	False	False	Death	Death	No	4	4	Independent
	Epimed Monitor	General/Mixed	False	H1654	two	Public	Brazil	AGE2680	17	5f9db198-1c3e-43f2-b449-357f978ed70c	1656590	70	2021-03-02	21:30	Clinic	False	False	False	Death	Death	No	3	3	Independent	False	False	False	False	False	False	False	False	False		False			False	False	False	False	TRUE	False	False	False	False	False	False	False
	Epimed Monitor	General/Mixed	False	H1654	two	Public	Brazil	AGE2680	17	c5f7f659-12bd-439b-9001-6e1dd1a18262	1656713	64	2021-03-03	20:03	Clinic	False	False	False	High	High	No	5	10	Independent	False	False	False	False	False	False	False	False	False		False			False	False	False	False	False	False	False	False	False	False	False	False
	Epimed Monitor	General/Mixed	False	H1654	two	Public	Brazil	AGE2680	17	bdfc3057-2799-46b4-b3db-cf52989ff4be	1656332	53	2021-03-04	14:30	Clinic	False	False	False	Death	Death	No	1	5	Independent	False	False	False	False	False	False	False	False	False		False			False	False	False	False	False	False	False	False	False	False	False	False
	Epimed Monitor	General/Mixed	False	H1654	two	Public	Brazil	AGE2680	17	23b2523e-f288-417a-892a-7f5463c7fbdf	1656522	64	2021-03-04	17:30	Clinic	False	False	False	Death	Death	No	9	9	Independent	False	False	False	False	False	False	False	False	False		False			False	False	False	False	TRUE	False	TRUE	False	False	False	False	False
	Epimed Monitor	General/Mixed	False	H1654	two	Public	Brazil	AGE2680	17	fe06120a-876d-4870-b5b5-d5c4a62c5ba0	1656867	74	2021-03-05	17:00	Clinic	False	False	False	High	Death	No	16	29	Independent
	Epimed Monitor	General/Mixed	False	H1654	two	Public	Brazil	AGE2680	17	290d7a3e-3dd2-4eb3-b491-bba917ec0cc7	1656861	68	2021-03-05	21:00	Clinic	False	False	False	Death	Death	No	6	6	Independent	False	False	False	False	False	False	False	False	False		False			False	False	False	False	TRUE	False	TRUE	False	False	False	False	False
	Epimed Monitor	General/Mixed	False	H1654	two	Public	Brazil	AGE2680	17	f693a961-057e-47f1-be2f-d5eacba82df1	1656864	68	2021-03-06	15:00	Clinic	False	False	False	Death	Death	No	14	15	Independent
	Epimed Monitor	General/Mixed	False	H1654	two	Public	Brazil	AGE2680	17	a9cb851b-5627-4204-9e59-9a44e6fe92aa	1656902	76	2021-03-07	01:35	Clinic	False	False	False	Death	Death	No	11	11	Independent	False	False	False	False	False	False	False	False	False		False			False	False	False	False	TRUE	False	False	False	False	False	False	False
	Epimed Monitor	General/Mixed	TRUE	H1654	two	Public	Brazil	AGE2680	17	4e2524fe-8aad-4a70-b004-c136d5940f24	1656909	49	2021-03-07	14:15	Clinic	False	False	False	Death	Death	No	1	1	Independent	False	False	False	False	False	False	False	False	False		False			False	False	False	False	False	TRUE	False	False	False	False	False	False
	Epimed Monitor	General/Mixed	False	H1654	two	Public	Brazil	AGE2680	17	0a233eff-f70c-4b20-bef6-d46b7bb833df	1656834	54	2021-03-07	22:40	Clinic	False	False	False	High	High	No	9	22	Independent
	Epimed Monitor	General/Mixed	False	H1654	two	Public	Brazil	AGE2680	17	b015039e-6496-4a26-bd59-1afd0b89335e	16535538	56	2021-03-08	17:00	Clinic	TRUE	False	False	High	High	No	30	56	Independent	False	False	False	False	False	False	False	False	False		False			False	False	False	False	False	False	False	False	False	False	False	False
	Epimed Monitor	General/Mixed	False	H1654	two	Public	Brazil	AGE2680	17	584df6c6-bbdd-436f-a509-1d4c62251bcc	1656986	47	2021-03-08	21:00	Clinic	False	False	False	Death	Death	No	10	10	Independent	False	False	False	False	False	False	False	False	False		False			False	False	False	False	TRUE	False	TRUE	False	False	False	False	False
	Epimed Monitor	General/Mixed	False	H1654	two	Public	Brazil	AGE2680	17	ca942a27-40a2-4ddb-957e-2175468b7620	1656995	59	2021-03-08	23:50	Clinic	False	False	False	Death	Death	No	10	10	Independent
	Epimed Monitor	General/Mixed	False	H1654	two	Public	Brazil	AGE2680	17	423958ca-4ff2-446a-808e-fbd04853b079	1657019	30	2021-03-10	18:00	Clinic	False	False	False	Death	Death	No	22	23	Independent	False	False	False	False	False	False	False	False	False		False			False	False	False	False	False	False	False	False	False	False	False	False
	Epimed Monitor	General/Mixed	False	H1654	two	Public	Brazil	AGE2680	17	fccd7fa2-f9a1-4afe-9282-494acafd2e6c	260355	38	2021-03-11	23:00	Clinic	False	False	False	Death	Death	No	6	8	Independent	False	False	False	False	False	False	False	False	False		False			False	False	False	False	False	TRUE	False	False	False	False	False	False
	Epimed Monitor	General/Mixed	False	H1654	two	Public	Brazil	AGE2680	17	6ecfa2a3-34c7-4121-80ef-4eb2e04ef8de	177386	76	2021-03-12	4:00 pm	Clinic	False	False	False	High	High	No	7	22
	Epimed Monitor	General/Mixed	False	H1654	two	Public	Brazil	AGE2680	17	714557bb-594f-499c-9e9d-7ad15039643c	1110452	40	2021-03-12	20:45	Clinic	False	False	False	High	High	No	3	44	Independent	False	False	False	False	False	False	False	False	False		False			False	False	False	False	False	False	False	False	False	False	False	False
	Epimed Monitor	General/Mixed	False	H1654	two	Public	Brazil	AGE2680	17	dbd8bb9e-172a-48fb-bb41-5c62c349c6ae	1208	40	2021-03-12	21:00	Clinic	False	False	False	Death	Death	No	2	2	Independent	False	False	False	False	False	False	False	False	False		False			False	False	False	False	False	False	False	False	False	False	False	False
	Epimed Monitor	General/Mixed	False	H1654	two	Public	Brazil	AGE2680	17	56041d33-6c97-44e8-abca-afedc51f3096	1112174	44	2021-03-12	21:10	Clinic	False	False	False	Death	Death	No	3	3	Independent	False	False	False	False	False	False	False	False	False		False			False	False	False	False	False	False	False	False	False	False	False	False
	Epimed Monitor	General/Mixed	False	H1654	two	Public	Brazil	AGE2680	17	9c1f8b51-5005-47ee-89e9-96247da888e4	1657359	41	2021-03-13	4:00 pm	Clinic	False	False	False	Death	Death	No	6	7	Independent	False	False	False	False	False	False	False	False	False		False			False	False	False	False	TRUE	False	False	False	False	False	False	False
	Epimed Monitor	General/Mixed	False	H1654	two	Public	Brazil	AGE2680	17	e00d3a6d-1bdf-4064-8e9e-f1c42da33dec	1657445	43	2021-03-14	12:38	Clinic	False	False	False	High	Death	No	1	6	Independent
	Epimed Monitor	General/Mixed	False	H1654	two	Public	Brazil	AGE2680	17	ed006994-56a0-44de-8847-629eaa3e91af	1657154	50	2021-03-14	22:30	Clinic	False	False	False	High	High	No	21	45	Independent	False	False	False	False	False	False	False	False	False		False			False	False	False	False	False	False	False	False	False	False	False	False
	Epimed Monitor	General/Mixed	False	H1654	two	Public	Brazil	AGE2680	17	4be614b4-e384-4bf6-a774-bed9a8a52607	767461	69	2021-03-16	15:30	Clinic	False	False	False	Death	Death	No	1	30	Independent	False	False	False	False	False	False	False	False	False		False			False	False	False	False	TRUE	False	TRUE	False	False	False	TRUE	False
	Epimed Monitor	General/Mixed	False	H1654	two	Public	Brazil	AGE2680	17	76651bf0-726c-41c3-aa9c-21e3201d038d	1657775	50	2021-03-16	20:38	Clinic	False	False	False	High	High	No	9	19	Independent
	Epimed Monitor	General/Mixed	False	H1654	two	Public	Brazil	AGE2680	17	2dc3c042-efb5-42e9-9341-05d5d8f8ac45	1657782	56	2021-03-16	21:10	Clinic	False	False	False	Death	Death	No	11	11	Independent	False	False	False	False	False	False	False	False	False		False			False	False	False	False	False	False	TRUE	False	False	False	False	False
	Epimed Monitor	General/Mixed	False	H1654	two	Public	Brazil	AGE2680	17	c4ad59fc-7b14-4dd0-ae4f-d6f618f6d733	1656920	52	2021-03-16	23:00	Clinic	False	False	False	Death	Death	No	5	14	Independent	False	False	False	False	False	False	False	False	False		False			False	False	False	False	TRUE	False	TRUE	False	False	False	False	False
	Epimed Monitor	General/Mixed	False	H1654	two	Public	Brazil	AGE2680	17	7295f85d-14b6-440a-a50a-b81473d5b70f	1657840	56	2021-03-16	23:15	Clinic	False	False	False	High	High	No	13	17	Independent
	Epimed Monitor	General/Mixed	False	H1654	two	Public	Brazil	AGE2680	17	9cc46131-661a-4314-8671-f49e1d3344e0	264871	48	2021-03-17	12:00 pm	Clinic	TRUE	False	False	Death	Death	No	1	27	Need for assistance	TRUE	False	False	False	False	False	False	False	False		False			False	False	False	False	TRUE	False	False	False	False	False	TRUE	False
	Epimed Monitor	General/Mixed	False	H1654	two	Public	Brazil	AGE2680	17	4e8dabd8-bfc3-48f8-8364-99df482ebeb7	1657893	52	2021-03-17	17:50	Clinic	False	False	False	High	High	No	22	29	Independent
	Epimed Monitor	General/Mixed	False	H1654	two	Public	Brazil	AGE2680	17	0672af6f-858e-4451-8a99-453b4adbbd06	1657904	83	2021-03-17	21:00	Clinic	False	False	False	High	High	No	12	33	Independent	False	False	False	False	False	False	False	False	False		False			False	False	False	False	TRUE	False	TRUE	False	False	False	False	False
	Epimed Monitor	General/Mixed	False	H1654	two	Public	Brazil	AGE2680	17	6e3f6fae-f632-491e-8432-3902d9bfa980	1657898	64	2021-03-17	22:30	Clinic	False	False	False	Death	Death	No	9	9	Independent	False	False	False	False	False	False	False	False	False		False			False	False	False	False	TRUE	False	False	False	False	False	False	False
	Epimed Monitor	General/Mixed	False	H1654	two	Public	Brazil	AGE2680	17	674e68f5-b2de-4581-9303-932b585e4890	1449892	50	2021-03-18	16:10	Clinic	False	False	False	Death	Death	No	1	1	Independent	False	False	False	False	False	False	False	False	False		False			False	False	False	False	TRUE	False	TRUE	False	False	False	False	False
	Epimed Monitor	General/Mixed	False	H1654	two	Public	Brazil	AGE2680	17	967a12cf-620e-4234-a82c-6fe808cbf9ce	1658043	64	2021-03-19	01:10	Clinic	False	False	False	Death	Death	No	4	4	Independent	False	False	False	False	False	False	False	False	False		False			False	False	False	False	TRUE	False	TRUE	False	False	False	False	False
	Epimed Monitor	General/Mixed	False	H1654	two	Public	Brazil	AGE2680	17	a939dc14-edb1-47be-b18f-2d051449c459	1658110	69	2021-03-19	12:53	Clinic	False	False	False	Death	Death	No	15	15	Independent
	Epimed Monitor	General/Mixed	False	H1654	two	Public	Brazil	AGE2680	17	390f0a86-6323-44af-9bc5-b552ee5f60d7	1657783	84	2021-03-19	21:00	Clinic	False	False	False	Death	Death	No	2	5	Independent	False	False	False	False	False	False	False	False	False		False			False	False	False	False	TRUE	False	TRUE	False	False	False	False	False
	Epimed Monitor	General/Mixed	False	H1654	two	Public	Brazil	AGE2680	17	12c672ff-d542-42c2-9b39-f66c0636a8e4	1658193	67	2021-03-20	15:41	Clinic	False	False	False	Death	Death	No	6	6	Independent
	Epimed Monitor	General/Mixed	False	H1654	two	Public	Brazil	AGE2680	17	d967687e-3124-4cfe-8a37-849da8368db3	1657419	82	2021-03-20	15:42	Clinic	False	False	False	Death	Death	No	5	12	Independent
	Epimed Monitor	General/Mixed	False	H1654	two	Public	Brazil	AGE2680	17	772b016d-254e-47d8-b2ae-cd860ca23e7d	1658201	52	2021-03-20	18:50	Clinic	False	False	False	Death	Death	No	22	22	Independent	False	False	False	False	False	False	False	False	False		False			False	False	False	False	False	False	False	False	False	False	False	False
	Epimed Monitor	General/Mixed	False	H1654	two	Public	Brazil	AGE2680	17	61b4f11a-7bcc-41c2-9aa4-a2aaf2afe88d	1658021	41	2021-03-21	21:30	Clinic	False	False	False	Death	Death	No	26	29	Independent
	Epimed Monitor	General/Mixed	False	H1654	two	Public	Brazil	AGE2680	17	a855ba15-e89f-45cd-8a5c-afe85f0421db	1658904	53	2021-03-22	20:30	Clinic	False	False	False	Death	Death	No	14	14	Independent	False	False	False	False	False	False	False	False	False		False			False	False	False	False	TRUE	False	False	False	False	False	False	False
	Epimed Monitor	General/Mixed	False	H1654	two	Public	Brazil	AGE2680	17	d3887c83-7116-488b-b949-602afde38fd9	1657621	75	2021-03-25	12:27	Clinic	False	False	False	High	Death	No	12	33	Independent	TRUE	False	TRUE	False	False	False	False	False	False		False			False	False	False	False	TRUE	False	False	TRUE	False	False	False	False
	Epimed Monitor	General/Mixed	False	H1654	two	Public	Brazil	AGE2680	17	ea5bb7ff-337e-4473-acaa-4eae168c3d7a	1658697	58	2021-03-25	12:38	Clinic	False	False	False	Death	Death	Yes, limit	6	7	Independent	False	False	False	False	False	False	False	False	False		False			False	False	False	False	False	False	TRUE	False	False	False	False	False
	Epimed Monitor	General/Mixed	False	H1654	two	Public	Brazil	AGE2680	17	70cabc60-6cfe-4b42-862a-6318540a9d49	1658792	78	2021-03-25	14:34	Clinic	False	False	False	Death	Death	No	1	1	Independent	False	False	False	False	False	False	False	False	False		False			False	False	False	False	TRUE	False	TRUE	False	False	False	False	False
	Epimed Monitor	General/Mixed	False	H1654	two	Public	Brazil	AGE2680	17	9b513cc3-dbe2-4382-82ac-b3460c2ec04a	1659002	35	2021-03-26	12:35	Clinic	False	False	False	High	High	No	9	13	Independent
	Epimed Monitor	General/Mixed	False	H1654	two	Public	Brazil	AGE2680	17	05d7cdf3-b875-41f4-a7ad-a42738cac0e0	16599029	34	2021-03-27	12:30	Clinic	False	False	False	High	High	No	21	30	Independent	False	False	False	False	False	False	False	False	False		False			False	False	False	False	TRUE	False	False	False	False	False	False	False
	Epimed Monitor	General/Mixed	False	H1654	two	Public	Brazil	AGE2680	17	3c12738b-18fe-4f9c-b7a6-8a59c60e7aa0	1659048	51	2021-03-27	16:30	Clinic	False	False	False	Death	Death	No	14	14	Independent	False	False	False	False	False	False	False	False	False		TRUE	1	Multiple myeloma	TRUE	False	False	False	TRUE	False	False	False	False	False	False	False
	Epimed Monitor	General/Mixed	False	H1654	two	Public	Brazil	AGE2680	17	adc46b26-7522-4618-97dd-f2f7eefea9cd	1659256	35	2021-03-29	22:20	Clinic	False	False	False	Death	Death	No	27	27	Independent
	Epimed Monitor	General/Mixed	False	H1654	two	Public	Brazil	AGE2680	17	f75500e2-2844-4b4a-864b-85e342c1abe0	1659260	77	2021-03-30	18:21	Clinic	False	False	False	Death	Death	No	9	9	Independent	False	False	TRUE	False	False	False	False	False	False		False			False	False	False	False	TRUE	False	False	False	False	False	False	False
	Epimed Monitor	General/Mixed	False	H1654	two	Public	Brazil	AGE2680	17	5fb3533e-88a3-4b67-bb5f-cb46e13f8702	1659522	68	2021-03-31	19:50	Clinic	False	False	False	Death	Death	No	3	3	Independent	False	False	False	False	False	False	False	False	False		False			False	False	False	False	TRUE	False	TRUE	False	False	False	False	False
	Epimed Monitor	General/Mixed	False	H1654	two	Public	Brazil	AGE2680	17	58111fe4-aec0-400f-8983-c44302569b15	1659375	56	2021-04-01	10:36	Clinic	False	False	False	Death	Death	No	5	7	Independent	False	False	False	False	False	False	False	False	False		False			False	False	False	False	TRUE	False	TRUE	False	False	False	False	False
	Epimed Monitor	General/Mixed	False	H1654	two	Public	Brazil	AGE2680	17	0ae7009a-f59a-4489-8e34-0e6c27c4822e	1659399	48	2021-04-02	02:30	Clinic	False	False	False	High	High	No	11	20	Independent
	Epimed Monitor	General/Mixed	False	H1654	two	Public	Brazil	AGE2680	17	67c283a5-02e1-446e-90f2-370fd6da8ef6	1659776	74	2021-04-03	21:50	Clinic	False	False	False	Death	Death	No	8	8	Independent	False	False	False	False	False	False	False	False	False		False			False	False	False	False	TRUE	False	TRUE	False	False	False	False	False
	Epimed Monitor	General/Mixed	False	H1654	two	Public	Brazil	AGE2680	17	e3db048d-96fc-4594-968b-8cad84d26198	165918	52	2021-04-04	20:30	Clinic	False	False	False	Death	Death	No	23	27	Independent	False	False	False	False	False	False	False	False	False		False			False	False	False	False	TRUE	False	TRUE	False	False	False	False	False
	Epimed Monitor	General/Mixed	False	H1654	two	Public	Brazil	AGE2680	17	af582a7b-ee46-4e5f-aec9-87b9578f7105	190139	62	2021-04-04	21:10	Clinic	False	False	False	Death	Death	No	3	13	Independent	False	False	False	False	False	False	False	False	False		False			TRUE	False	False	TRUE	TRUE	False	False	TRUE	False	False	False	False
	Epimed Monitor	General/Mixed	False	H1654	two	Public	Brazil	AGE2680	17	5124ae35-5a31-4ce8-b4cf-fcbb9d3e8a2c	246436	75	2021-04-04	22:50	Clinic	False	False	False	Death	Death	No	13	13	Independent	False	False	False	False	False	False	False	False	False		False			False	False	False	False	TRUE	False	TRUE	False	False	False	False	False
	Epimed Monitor	General/Mixed	False	H1654	two	Public	Brazil	AGE2680	17	82b202bb-75a0-4d53-8b89-b9abef0a034a	1659813	66	2021-04-06	02:30	Clinic	False	False	False	Death	Death	No	17	19	Independent	False	False	False	False	False	False	False	False	False		False			False	False	False	False	TRUE	False	False	False	False	TRUE	False	False
	Epimed Monitor	General/Mixed	False	H1654	two	Public	Brazil	AGE2680	17	4553c910-e0f7-47f9-8546-c73996efcee4	1659981	59	2021-04-06	18:00	Clinic	False	False	False	Death	Death	No	19	20	Independent	False	False	False	False	False	False	False	False	False		False			False	False	False	False	TRUE	False	False	False	False	False	False	False
	Epimed Monitor	General/Mixed	False	H1654	two	Public	Brazil	AGE2680	17	d6c984cb-67e0-4f7b-93fb-782d706ee29e	1660307	59	2021-04-07	14:15	Clinic	False	False	False	Death	Death	No	2	2	Independent	False	False	False	False	False	False	False	False	False		False			False	False	False	False	TRUE	False	TRUE	False	False	False	False	False
	Epimed Monitor	General/Mixed	False	H1654	two	Public	Brazil	AGE2680	17	9c9ac52a-dce3-4116-94bd-052c03a92380	1659701	64	2021-04-07	20:45	Clinic	False	False	False	Death	Death	No	3	8	Independent	False	False	False	False	False	False	False	False	False		False			False	False	False	False	TRUE	False	TRUE	False	False	False	False	False
	Epimed Monitor	General/Mixed	False	H1654	two	Public	Brazil	AGE2680	17	11f1781e-208f-4764-b03d-ccecf95e58c4	1660361	47	2021-04-07	23:20	Clinic	False	False	False	High	High	No	17	26	Independent
	Epimed Monitor	General/Mixed	False	H1654	two	Public	Brazil	AGE2680	17	88c43fa6-1003-4ea2-b411-c0fa1c906bb4	1660480	74	2021-04-08	15:30	Clinic	False	False	False	High	High	No	16	22	Independent	False	False	False	False	False	False	False	False	False		False			False	False	False	False	TRUE	False	TRUE	False	False	False	False	False
	Epimed Monitor	General/Mixed	False	H1654	two	Public	Brazil	AGE2680	17	e80a8911-55ec-456a-90c3-8b7605a28acc	1660135	40	2021-04-09	11:30	Clinic	False	False	False	Death	Death	No	8	11	Independent	False	False	False	False	False	False	False	False	False		False			False	False	False	False	TRUE	TRUE	False	False	False	False	False	False
	Epimed Monitor	General/Mixed	False	H1654	two	Public	Brazil	AGE2680	17	b75c78b6-8311-45f5-9452-ecacb35409f4	1660672	39	2021-04-09	21:00	Clinic	False	False	False	Death	Death	No	7	7	Independent	False	False	False	False	False	False	False	False	False		False			False	False	False	False	TRUE	False	False	False	False	False	False	False
	Epimed Monitor	General/Mixed	False	H1654	two	Public	Brazil	AGE2680	17	5170f415-f437-467f-ad8c-9de303efc826	1659539	65	2021-04-10	11:00	Clinic	False	False	False	Death	Death	No	14	24	Independent	False	False	False	False	False	False	False	False	False		False			False	False	False	False	TRUE	False	False	TRUE	False	False	False	False
	Epimed Monitor	General/Mixed	False	H1654	two	Public	Brazil	AGE2680	17	1287c67e-983e-4636-8e2a-6204b01763e1	1660151	65	2021-04-10	11:00	Clinic	False	False	False	Death	Death	No	14	18	Independent
	Epimed Monitor	General/Mixed	False	H1654	two	Public	Brazil	AGE2680	17	8dcfe65d-d1a9-4c0f-b251-768dbc6f4008	1660497	73	2021-04-11	22:00	Clinic	False	False	False	Death	Death	No	15	18	Independent	False	False	False	False	False	False	False	False	False		False			False	False	False	False	TRUE	False	TRUE	False	False	False	False	False
	Epimed Monitor	General/Mixed	False	H1654	two	Public	Brazil	AGE2680	17	28474f53-7715-42e3-a78c-057b4901b2c7	1660760	66	2021-04-12	15:00	Clinic	False	False	False	High	High	No	15	26	Independent	False	False	False	False	False	False	False	False	False		False			False	False	False	False	TRUE	False	TRUE	False	False	False	False	False
	Epimed Monitor	General/Mixed	False	H1654	two	Public	Brazil	AGE2680	17	0ababf7b-9d6e-4579-9243-3151812b01aa	1660321	57	2021-04-13	18:00	Clinic	False	False	False	Death	Death	No	9	15	Independent	False	False	False	False	False	False	False	False	False		False			False	False	False	False	False	False	TRUE	False	False	False	False	False
	Epimed Monitor	General/Mixed	False	H1654	two	Public	Brazil	AGE2680	17	6ee8807d-f3d9-4e7a-b728-1659eb5a9797	1659756	73	2021-04-16	17:53	Clinic	False	False	False	Death	Death	No	3	16	Independent	False	False	False	False	False	False	False	False	False		False			False	False	False	False	TRUE	TRUE	False	False	False	False	False	False
	Epimed Monitor	General/Mixed	False	H1654	two	Public	Brazil	AGE2680	17	0c8f1a44-c739-4723-857c-2fd3041555aa	1661470	72	2021-04-16	20:36	Clinic	False	False	False	Death	Death	No	11	12	Independent	False	False	False	False	False	False	False	False	False		False			False	False	False	False	TRUE	False	False	False	False	False	False	False
	Epimed Monitor	General/Mixed	False	H1654	two	Public	Brazil	AGE2680	17	6de27e22-051f-46ae-891e-ef5e50fa19ad	1661113	52	2021-04-17	17:15	Clinic	False	False	False	Death	Death	No	16	20	Independent	False	False	False	False	False	False	False	False	False		False			False	False	False	False	TRUE	False	False	False	False	False	False	False
	Epimed Monitor	General/Mixed	False	H1654	two	Public	Brazil	AGE2680	17	1611a305-3ac7-44b5-a1c7-eab0e7bbc8b3	1661721	70	2021-04-18	14:40	Clinic	False	False	False	Death	Death	No	16	16	Independent	False	False	False	False	False	False	False	False	False		False			False	False	False	False	TRUE	False	False	False	False	False	False	False
	Epimed Monitor	General/Mixed	False	H1654	two	Public	Brazil	AGE2680	17	a2358f35-4c32-4dc0-aa30-467056c7f7b8	1661634	66	2021-04-20	15:00	Clinic	False	False	False	Death	Death	No	16	20	Independent	False	False	False	False	False	False	False	False	False		False			False	False	False	False	TRUE	False	False	False	False	False	False	False
	Epimed Monitor	General/Mixed	False	H1654	two	Public	Brazil	AGE2680	17	3be19dcd-a47f-4729-990f-6f62a713fcab	1661708	65	2021-04-21	09:30	Clinic	False	False	False	Death	Death	No	6	9	Independent
	Epimed Monitor	General/Mixed	False	H1654	two	Public	Brazil	AGE2680	17	544ae349-040f-4734-a8c9-e9f96affbc17	1662382	78	2021-04-24	20:50	Clinic	False	False	False	High	High	No	2	4	Independent	False	False	False	False	False	False	False	False	False		False			False	False	False	False	TRUE	False	False	False	False	False	False	False
	Epimed Monitor	General/Mixed	False	H1654	two	Public	Brazil	AGE2680	17	830baa1d-1098-492c-bebc-0209d170a2fb	1662149	40	2021-04-24	22:40	Clinic	False	False	False	High	High	No	17	29	Independent	False	False	False	False	False	False	False	False	False		False			False	False	False	False	False	False	TRUE	False	False	False	False	False
	Epimed Monitor	General/Mixed	False	H1654	two	Public	Brazil	AGE2680	17	c7737c67-49a8-4b22-816b-d6da66bc1ec2	1662386	66	2021-04-25	01:45	Clinic	False	False	False	High	High	No	2	8	Independent	False	False	False	False	False	False	False	False	False		False			False	False	False	False	TRUE	False	False	False	False	False	False	False
	Epimed Monitor	General/Mixed	False	H1654	two	Public	Brazil	AGE2680	17	c380a09f-fac5-4eaa-a47a-421666d8ffe3	1661509	70	2021-04-26	10:00 am	Clinic	False	False	False	Death	Death	No	20	31	Independent	False	False	False	False	False	False	False	False	False		False			False	False	False	False	TRUE	False	False	False	False	False	False	False
	Epimed Monitor	General/Mixed	False	H1654	two	Public	Brazil	AGE2680	17	b569829b-ff63-4d11-9468-f7ce5bec81a2	1662575	68	2021-04-26	14:00	Clinic	False	False	False	High	High	No	6	19	Independent	False	False	False	False	False	False	False	False	False		False			False	False	False	False	TRUE	False	False	False	False	False	False	False
	Epimed Monitor	General/Mixed	False	H1654	two	Public	Brazil	AGE2680	17	e3ae31c1-2dea-42bb-93f1-cc9e92d1f42c	1662596	74	2021-04-26	16:30	Clinic	False	False	False	Death	Death	No	3	3	Independent	False	False	False	False	False	False	False	False	False		False			False	False	False	False	TRUE	False	TRUE	False	False	False	False	False
	Epimed Monitor	General/Mixed	False	H1654	two	Public	Brazil	AGE2680	17	fa5db3d9-69b3-46f3-8072-19b868137112	1656339	65	2021-04-26	21:00	Clinic	False	False	False	Death	Death	Yes, limit	3	60	Restricted/bed-bound
	Epimed Monitor	General/Mixed	False	H1654	two	Public	Brazil	AGE2680	17	3ce829df-f1fd-46e7-8a8a-cfa87726128b	1662653	77	2021-04-27	11:50	Clinic	False	False	False	Death	Death	No	4	4	Independent	False	False	False	False	False	False	False	False	False		False			False	False	False	False	False	False	False	False	False	False	False	False
	Epimed Monitor	General/Mixed	False	H1654	two	Public	Brazil	AGE2680	17	8868865c-7f13-496f-8dc1-6bb859515976	1662769	74	2021-04-27	20:10	Clinic	False	False	False	High	High	No	4	4	Independent	False	False	False	False	False	False	False	False	False		False			False	False	False	False	TRUE	False	False	False	False	False	False	False
	Epimed Monitor	General/Mixed	False	H1654	two	Public	Brazil	AGE2680	17	fd21e213-c65d-47b4-899e-88d7e9c15a7c	1662768	47	2021-04-27	20:30	Clinic	False	False	False	High	High	No	4	9	Independent	False	False	False	False	False	False	False	TRUE	False	Soft parts	False			False	False	False	False	TRUE	False	False	False	False	False	False	False
	Epimed Monitor	General/Mixed	False	H1654	two	Public	Brazil	AGE2680	17	767494e3-4f51-47a7-bffe-e7f35b2e65b8	1662854	61	2021-04-28	11:54	Clinic	False	False	False	High	High	No	9	16	Independent	False	False	False	False	False	False	False	False	False		False			False	False	False	False	TRUE	False	TRUE	False	False	False	False	False
	Epimed Monitor	General/Mixed	False	H1654	two	Public	Brazil	AGE2680	17	4a8ee80f-c545-4658-b641-a2dc4f84192d	1662416	44	2021-04-28	14:20	Clinic	False	False	False	High	Death	No	2	13	Independent
	Epimed Monitor	General/Mixed	False	H1654	two	Public	Brazil	AGE2680	17	f0813108-3a91-4f85-9ab2-b42d7824ce1d	1662757	42	2021-04-29	01:30	Clinic	False	False	False	High	High	No	12	31	Independent	False	False	False	False	False	False	False	False	False		False			False	False	False	False	False	False	False	False	False	False	False	False
	Epimed Monitor	General/Mixed	False	H1654	two	Public	Brazil	AGE2680	17	c564d36c-9e7d-41a7-9906-04e8b3c6be5e	1663070	60	2021-04-30	00:30	Clinic	False	False	False	Death	Death	No	8	8	Independent	False	False	False	False	False	False	False	False	False		False			False	False	False	False	TRUE	False	False	False	False	False	False	False
	Epimed Monitor	General/Mixed	False	H1654	two	Public	Brazil	AGE2680	17	c4cd6086-cd8a-40db-a9d9-2b3cdc48deb6	1663072	59	2021-04-30	03:00	Clinic	False	False	False	High	High	No	12	18	Independent	False	False	False	False	False	False	False	False	False		False			False	False	False	False	TRUE	False	TRUE	False	False	False	False	False
	Epimed Monitor	General/Mixed	False	H1654	two	Public	Brazil	AGE2680	17	46a7d502-7f11-43ba-8f45-07b502bca5bb	1663061	45	2021-04-30	11:00	Clinic	False	False	False	Death	Death	No	8	8	Independent	False	False	False	False	False	False	False	False	False		False			False	False	False	False	False	False	False	TRUE	False	False	False	False
	Epimed Monitor	General/Mixed	False	H1654	two	Public	Brazil	AGE2680	17	279da8bc-0793-46a3-8669-31b36a2e38b2	1662771	80	2021-04-30	15:08	Clinic	False	False	False	Death	Death	No	2	5	Independent	False	False	False	False	False	False	False	False	False		False			False	False	False	False	TRUE	False	False	False	False	False	False	False
	Epimed Monitor	General/Mixed	False	H1654	two	Public	Brazil	AGE2680	17	61831efa-8904-4468-9d2f-65551eaa534c	1662605	65	2021-05-02	08:30	Clinic	False	False	False	Death	Death	No	14	20	Independent	False	False	False	False	False	False	False	False	False		False			False	False	False	False	TRUE	False	False	False	False	False	False	False
	Epimed Monitor	General/Mixed	False	H1654	two	Public	Brazil	AGE2680	17	925bc2ec-ba98-4a0e-8452-7151e3eb06fe	1663209	56	2021-05-02	10:33	Clinic	False	False	False	High	High	No	18	19	Independent	False	False	False	False	False	False	False	False	False		False			False	False	False	False	False	False	False	False	False	False	False	False
	Epimed Monitor	General/Mixed	False	H1654	two	Public	Brazil	AGE2680	17	7f1b2f77-37bd-4a74-a885-0f1a06fab2bf	1663213	37	2021-05-02	16:15	Clinic	False	False	False	Death	Death	No	23	24	Independent	False	False	False	False	False	False	False	False	False		False			False	False	False	False	False	False	False	False	False	False	False	False
	Epimed Monitor	General/Mixed	False	H1654	two	Public	Brazil	AGE2680	17	68890afc-a77d-4f13-8176-811e54e390d3	1661867	68	2021-05-03	10:00 am	Clinic	False	False	False	Death	Death	No	13	27	Independent	False	False	False	False	False	False	False	False	False		False			False	TRUE	False	False	TRUE	False	False	False	False	False	False	False
	Epimed Monitor	General/Mixed	False	H1654	two	Public	Brazil	AGE2680	17	ee37d761-b8a7-41c3-8de6-05df24d42d8c	1663198	27	2021-05-03	12:00 pm	Clinic	False	False	False	High	High	No	15	22	Independent	False	False	False	False	False	False	False	False	False		False			False	False	False	False	False	False	False	False	False	False	False	False
	Epimed Monitor	General/Mixed	False	H1654	two	Public	Brazil	AGE2680	17	e5c5400c-7827-4b5c-a3b5-545eb126eb3a	1662400	57	2021-05-03	15:00	Clinic	False	False	False	Death	Death	No	6	14	Independent	False	False	False	False	False	False	False	False	False		False			False	False	False	False	TRUE	False	False	False	False	False	False	False
	Epimed Monitor	General/Mixed	False	H1654	two	Public	Brazil	AGE2680	17	b8932250-52ec-4273-ae75-68169452bed0	1660360	55	2021-05-04	15:44	Clinic	False	False	False	High	High	No	3	44	Independent
	Epimed Monitor	General/Mixed	False	H1654	two	Public	Brazil	AGE2680	17	37051290-ca9a-4ca0-8e2a-dba8bca90fec	1663590	56	2021-05-04	4:00 pm	Clinic	False	False	False	Death	Death	No	13	13	Independent
	Epimed Monitor	General/Mixed	False	H1654	two	Public	Brazil	AGE2680	17	c9068f06-f3c4-4c1c-ae45-fc170ae839d5	1663544	67	2021-05-06	11:29	Clinic	False	False	False	High	High	No	11	18	Independent	False	False	False	False	False	False	TRUE	False	False		False			False	False	False	False	TRUE	False	False	False	False	False	False	False
	Epimed Monitor	General/Mixed	False	H1654	two	Public	Brazil	AGE2680	17	1b2bec37-3e95-4e57-bdc9-e83d8d484c73	1663665	54	2021-05-07	10:59	Clinic	False	False	False	Death	Death	No	1	3	Independent	False	False	False	False	False	False	False	False	False		False			False	False	False	False	False	False	False	False	False	False	False	False
	Epimed Monitor	General/Mixed	False	H1654	two	Public	Brazil	AGE2680	17	c3e774fb-cf8c-4af6-bc8f-415e3b4bdd8e	1663729	60	2021-05-07	12:45	Clinic	False	False	False	High	High	No	3	13	Independent	False	False	False	False	False	False	False	False	False		False			False	False	False	False	TRUE	False	False	False	False	False	False	False
	Epimed Monitor	General/Mixed	False	H1654	two	Public	Brazil	AGE2680	17	d9e421ec-68b9-498a-910b-8cf075e7567a	1663689	50	2021-05-08	4:00 pm	Clinic	False	False	False	Death	Death	No	1	3	Independent	False	False	False	False	False	False	False	False	False		False			False	False	False	False	TRUE	False	False	False	False	False	False	False
	Epimed Monitor	General/Mixed	False	H1654	two	Public	Brazil	AGE2680	17	d0ab68df-64d9-4721-809e-3450fa834ed2	1664096	49	2021-05-09	17:30	Clinic	False	False	False	Death	Death	No	19	19	Independent	False	False	False	False	False	False	False	False	False		False			False	False	False	False	False	False	TRUE	False	False	False	False	False
	Epimed Monitor	General/Mixed	False	H1654	two	Public	Brazil	AGE2680	17	100fd0a1-d647-440f-8507-4c45aec82021	1664111	30	2021-05-09	23:32	Clinic	False	False	False	Death	Death	No	25	25	Independent	False	False	False	False	False	False	False	False	False		False			False	False	False	False	False	False	False	False	False	False	False	False
	Epimed Monitor	General/Mixed	False	H1654	two	Public	Brazil	AGE2680	17	135ed78b-4347-46cf-9f1a-43ca0e054821	1664129	63	2021-05-10	12:39	Clinic	False	False	False	Death	Death	No	17	17	Independent	False	False	False	False	TRUE	False	False	False	False		False			False	False	False	False	TRUE	False	False	False	False	False	False	False
	Epimed Monitor	General/Mixed	False	H1654	two	Public	Brazil	AGE2680	17	17a604b4-9e6d-4a15-888d-0dc3bca38974	1662618	28	2021-05-11	11:00	Clinic	False	False	False	Death	Death	No	18	18	Independent
	Epimed Monitor	General/Mixed	False	H1654	two	Public	Brazil	AGE2680	17	ff46dd9d-8659-429a-b08b-a545433dc498	1664066	52	2021-05-12	00:00	Clinic	False	False	False	Death	Death	No	5	9	Independent	False	False	False	False	False	False	False	False	False		False			False	False	False	False	False	False	False	False	False	False	False	False
	Epimed Monitor	General/Mixed	False	H1654	two	Public	Brazil	AGE2680	17	90a1223d-8329-48ba-95f3-188cbd7a8540	1664177	59	2021-05-12	11:23	Clinic	False	False	False	High		No	7		Independent	False	False	False	False	False	False	False	False	False		False			False	False	False	False	False	False	TRUE	False	False	False	False	False
	Epimed Monitor	General/Mixed	False	H1654	two	Public	Brazil	AGE2680	17	b65dcc8d-e4bf-4ed2-a540-04349e4e1b36	1664108	79	2021-05-12	14:39	Clinic	False	False	False	Death	Death	No	12	15	Independent
	Epimed Monitor	General/Mixed	False	H1654	two	Public	Brazil	AGE2680	17	9634e124-c93d-43fe-a9ff-98555d917913	1664418	48	2021-05-12	21:20	Clinic	False	False	False	High	High	No	9	18	Independent
	Epimed Monitor	General/Mixed	False	H1654	two	Public	Brazil	AGE2680	17	c41577f4-1896-460f-a19c-1ee04eb6ee96	1664672	61	2021-05-16	10:18	Clinic	False	False	False	Death	Death	No	5	8	Independent	False	False	False	False	False	False	False	False	False		False			False	False	False	False	False	False	TRUE	False	False	False	False	False
	Epimed Monitor	General/Mixed	False	H1654	two	Public	Brazil	AGE2680	17	7b7d8400-24d8-4b55-896f-5eb8ccea07d2	1664496	88	2021-05-16	16:05	Clinic	False	False	False	Death	Death	No	2	4	Independent	TRUE	False	False	False	False	False	False	False	False		False			False	False	False	False	TRUE	False	TRUE	False	False	False	False	False
	Epimed Monitor	General/Mixed	False	H1654	two	Public	Brazil	AGE2680	17	fb13b6b3-1823-4832-82de-f865a1943235	1664164	67	2021-05-17	16:30	Clinic	False	False	False	Death	Death	No	3	10	Independent	False	False	False	False	False	False	False	False	False		False			False	False	False	False	TRUE	False	False	False	False	False	False	False
	Epimed Monitor	General/Mixed	False	H1654	two	Public	Brazil	AGE2680	17	7bc83b2b-fb54-46a8-816d-daac19c71c96	1665260	58	2021-05-18	17:00	Clinic	False	False	False	High	High	No	11	13	Independent	False	False	False	False	False	False	False	False	False		False			False	False	False	False	TRUE	False	TRUE	False	False	False	False	False
	Epimed Monitor	General/Mixed	False	H1654	two	Public	Brazil	AGE2680	17	eb6763af-a69d-4d20-b67f-251c7d5b4578	1665283	57	2021-05-18	18:45	Clinic	False	False	False	Death	Death	No	14	14	Independent
	Epimed Monitor	General/Mixed	False	H1654	two	Public	Brazil	AGE2680	17	d91a2fcd-c4f3-4222-b8e6-70f4a7cf38e4	1664914	61	2021-05-18	18:45	Clinic	False	False	False	Death	Death	No	15	16	Independent	False	False	False	False	False	False	False	False	False		False			False	False	False	False	False	False	False	False	False	False	False	False
	Epimed Monitor	General/Mixed	False	H1654	two	Public	Brazil	AGE2680	17	471163d2-5ad6-4905-aeba-cb7bf76a7a49	1665141	57	2021-05-18	8:00 pm	Clinic	False	False	False	High		No	29		Independent	False	False	False	False	False	False	False	False	False		False			False	False	False	False	TRUE	False	False	False	False	False	False	False
	Epimed Monitor	General/Mixed	False	H1654	two	Public	Brazil	AGE2680	17	868135fe-b63f-464d-87d0-370e0ad7c832	1665294	63	2021-05-19	22:00	Clinic	False	False	False	Death	Death	No	2	2	Independent	False	False	False	False	False	False	False	False	False		False			False	False	False	False	TRUE	False	False	False	False	False	False	False
	Epimed Monitor	General/Mixed	False	H1654	two	Public	Brazil	AGE2680	17	e5bf4dfe-155d-4081-b9fe-9914b170550d	1665643	64	2021-05-21	00:30	Clinic	False	False	False	Death	Death	No	25	25	Independent	False	False	False	False	False	False	False	False	False		False			False	False	False	False	False	False	TRUE	False	False	False	False	False
	Epimed Monitor	General/Mixed	False	H1654	two	Public	Brazil	AGE2680	17	ea7fa969-4a11-4fb0-8bce-9417cd0187c0	1665711	31	2021-05-21	13:00	Clinic	False	False	False	Death	Death	No	5	5	Independent	False	False	False	False	False	False	False	False	False		False			False	False	False	False	False	False	False	False	False	False	False	False
	Epimed Monitor	General/Mixed	False	H1654	two	Public	Brazil	AGE2680	17	5a72419b-9a81-4b17-9a59-a2e90701b3a6	1665726	66	2021-05-22	13:40	Clinic	False	False	False	High		No	11		Independent	False	False	False	False	False	False	False	False	False		False			False	False	False	False	TRUE	False	TRUE	False	False	False	False	False
	Epimed Monitor	General/Mixed	False	H1654	two	Public	Brazil	AGE2680	17	1ed709ef-39ff-4920-818d-a800dd3877c9	1665871	47	2021-05-22	8:00 pm	Clinic	False	False	False	Death	Death	No	8	8	Independent
	Epimed Monitor	General/Mixed	False	H1654	two	Public	Brazil	AGE2680	17	7d4d5689-1ba0-4467-a6b0-f7b7bba7dc38	1665644	64	2021-05-22	22:00	Clinic	False	False	False	High		No	25		Independent
	Epimed Monitor	General/Mixed	False	H1654	two	Public	Brazil	AGE2680	17	b3eb5a26-643b-478b-802c-6636bfa40a2a	1666104	44	2021-05-24	18:00	Clinic	False	False	False	High		No	13		Independent	False	False	False	False	False	False	False	False	False		False			False	False	False	False	False	False	False	False	False	False	False	False
	Epimed Monitor	General/Mixed	False	H1654	two	Public	Brazil	AGE2680	17	848c2908-923a-4765-bffc-825734f6d67d	1665802	54	2021-05-25	10:30	Clinic	False	False	False	Death	Death	No	14	17	Independent	False	False	False	False	False	False	False	False	False		False			False	False	False	False	TRUE	False	TRUE	False	False	False	False	False
	Epimed Monitor	General/Mixed	False	H1654	two	Public	Brazil	AGE2680	17	f0044196-e83a-4030-b192-44a92851739b	1662393	62	2021-05-25	13:00	Clinic	False	False	False	Death	Death	No	12	42	Independent	False	False	False	False	False	False	False	False	False		False			False	False	False	False	TRUE	False	TRUE	False	False	False	False	False
	Epimed Monitor	General/Mixed	False	H1654	two	Public	Brazil	AGE2680	17	a38bdd07-0f3b-497d-9c7a-5825d965f06b	1665435	51	2021-05-27	01:05	Clinic	False	False	False	Death	Death	No	5	12	Independent	False	False	False	False	False	False	False	False	False		False			False	False	False	False	False	TRUE	False	False	False	False	False	False
	Epimed Monitor	General/Mixed	False	H1654	two	Public	Brazil	AGE2680	17	5c6da93a-d089-480e-b130-34f58e7df5c1	1666667	32	2021-05-28	11:00	Clinic	False	False	False	Death	Death	No	11	12	Independent	False	False	False	False	False	False	False	False	False		False			False	False	False	False	False	False	False	False	False	False	False	False
	Epimed Monitor	General/Mixed	False	H1654	two	Public	Brazil	AGE2680	17	2b725dca-936a-48b3-992a-fbb44019210a	1665613	66	2021-05-28	23:40	Clinic	False	False	False	Death	Death	No	9	17	Independent	False	False	False	False	False	False	False	False	False		False			False	False	False	False	TRUE	False	False	False	False	False	False	False
	Epimed Monitor	General/Mixed	False	H1654	two	Public	Brazil	AGE2680	17	b3557484-ad84-42a4-8281-6f5b7330450f	1666562	68	2021-05-29	12:00 pm	Clinic	False	False	False	Death	Death	No	2	4	Independent	False	False	False	False	False	False	False	False	False		False			False	False	False	False	TRUE	False	False	False	False	False	False	False
	Epimed Monitor	General/Mixed	False	H1654	two	Public	Brazil	AGE2680	17	fd6318b4-9c30-43e1-ac89-67b3d678203d	1666271	31	2021-05-30	07:30	Clinic	False	False	False	High	High	No	2	7	Independent	False	False	False	False	False	False	False	False	False		False			False	False	False	False	False	False	False	False	False	False	False	False
	Epimed Monitor	General/Mixed	False	H1654	two	Public	Brazil	AGE2680	17	dae59042-8490-4280-97f7-05c0801cf830	1666826	50	2021-05-30	11:00	Clinic	False	False	False	High		No	5		Independent
	Epimed Monitor	General/Mixed	False	H1654	two	Public	Brazil	AGE2680	17	0517fc1f-6aa2-4a30-b297-10c6bae5a9e9	1666958	59	2021-05-31	17:30	Clinic	False	False	False	High		No	17
	Epimed Monitor	General/Mixed	False	H1654	two	Public	Brazil	AGE2680	17	55fe1bd3-f461-4ac6-8166-adf9e9bf65ac	1666894	25	2021-06-01	10:00 am	Clinic	False	False	False	High		No	5		Independent	False	False	False	False	False	False	False	False	False		False			False	False	False	False	TRUE	False	False	False	False	False	False	False
	Epimed Monitor	General/Mixed	False	H1654	two	Public	Brazil	AGE2680	17	5b799cb4-81bb-4def-a6d8-4cefd4776144	1666272	39	2021-06-02	08:30	Clinic	False	False	False	High		No	11		Independent
	Epimed Monitor	General/Mixed	False	H1654	two	Public	Brazil	AGE2680	17	12e919c7-afd2-4eda-a79f-ad59726ff055	1666950	58	2021-06-02	08:30	Clinic	False	False	False	High		No	11		Independent	False	False	False	False	False	False	False	False	False		False			False	False	False	False	TRUE	False	TRUE	False	False	False	False	False
	Epimed Monitor	General/Mixed	False	H1654	two	Public	Brazil	AGE2680	17	468e64d2-40de-492d-9038-cd5cea5389d0	1667230	56	2021-06-02	17:00	Clinic	False	False	False	Death	Death	No	10	10	Independent	False	False	False	False	False	False	False	False	False		False			False	False	False	False	TRUE	False	TRUE	False	False	False	False	False
	Epimed Monitor	General/Mixed	False	H1654	two	Public	Brazil	AGE2680	17	bd6f9956-4f74-42bd-b22a-08be251d7fa9	1667423	53	2021-06-03	02:00	Clinic	False	False	False	Death	Death	No	14	15	Independent
	Epimed Monitor	General/Mixed	False	H1654	two	Public	Brazil	AGE2680	17	d3ab10b5-f792-44ff-9e49-74ddd6a4b4b3	1667080	77	2021-06-03	23:50	Clinic	False	False	False	Death	Death	No	4	7	Independent
	Epimed Monitor	General/Mixed	False	H1654	two	Public	Brazil	AGE2680	17	c31c130e-0083-4d3e-9182-d1a1fdb34f46	1667589	41	2021-06-04	20:30	Clinic	False	False	False	Death	Death	No	16	16	Independent
	Epimed Monitor	General/Mixed	False	H1654	two	Public	Brazil	AGE2680	17	608e9a0a-2d11-48ef-a36f-f92fa78050a0	1667735	72	2021-06-06	18:30	Clinic	False	False	False	Death	Death	No	1	1	Independent	False	False	False	False	False	False	False	False	False		False			False	False	False	False	TRUE	False	False	False	False	False	False	False
	Epimed Monitor	General/Mixed	False	H1654	two	Public	Brazil	AGE2680	17	b17b2d93-a917-4503-ab98-b20bbfe5c18f	1666464	57	2021-06-06	20:30	Clinic	False	False	False	Death	Death	No	6	15	Independent	False	False	False	False	False	False	False	False	False		False			False	False	False	False	False	False	False	False	False	False	False	False
	Epimed Monitor	General/Mixed	False	H1654	two	Public	Brazil	AGE2680	17	ecb8a808-0285-46ba-af3c-2ea1ddf065ed	1667738	35	2021-06-06	23:00	Clinic	False	False	False	Death	Death	No	18	18	Independent	False	False	False	False	False	False	False	False	False		False			False	False	False	False	TRUE	False	False	False	False	False	False	False
	Epimed Monitor	General/Mixed	False	H1654	two	Public	Brazil	AGE2680	17	3fb34814-544b-43db-a639-40848efc5df6	1667681	46	2021-06-07	06:00	Clinic	False	False	False	High		No	15		Independent
	Epimed Monitor	General/Mixed	False	H1654	two	Public	Brazil	AGE2680	17	17de84bb-76ad-46f1-9e6b-a4726493b108	1666483	58	2021-06-07	21:00	Clinic	False	False	False	Death	Death	No	3	3	Independent	TRUE	False	False	False	False	False	False	False	False		False			False	TRUE	False	False	TRUE	False	False	TRUE	False	False	False	False
[truncated: 141 more rows]
[truncated: 30 more columns]

## Sheet: Folha4
	Saps3AdmissionDiagnosis
[truncated: 725 more rows]

## Sheet: Folha5
	AcuteComplication
[truncated: 725 more rows]
[truncated: 8 more columns]

## Sheet: Folha6
	PhysiologicalLaboratory1h
[truncated: 725 more rows]

## Sheet: Folha7
	ICU Resource Use and Complications
[truncated: 725 more rows]
[truncated: 19 more columns]

## Sheet: Folha8
Secondary Diagnosis
[truncated: 725 more rows]
[truncated: 94 more columns]
