# Supplementary material for: Use of machine learning to identify protective factors for death from COVID-19 in the ICU: a retrospective study
Source: PeerJ journal article supplement (doi:10.7717/peerj.17428), 2024-06-12
Supplement: Supplementary_material.pdf [file Supplementary_material.pdf]

## Use of machine learning to identify protective factors for death from COVID-19 in the ICU

Lander Dos Santos<sup>1</sup> , Lincoln Luis Silva<sup>2</sup> , Fernando Castilho Peloso<sup>3</sup> , Vinicius Maia<sup>4</sup> , Constanza Pujals<sup>1</sup> , Deise Helena Peloso Borghesan<sup>5</sup> , Maria Dalva Carvalho<sup>1</sup> , Raíssa Bocchi Pedroso<sup>1</sup> , Sandra Marisa Peloso<sup>1</sup> .

<sup>1</sup> Graduate Program in Health Sciences, State University of Maringá, Maringá, Paraná, Brazil

<sup>2</sup> Department of Emergency Medicine, Duke University School of Medicine, Durham, North Carolina, United States of America

<sup>3</sup> Department of Medicine, Federal University of Paraná, Curitiba, Paraná, Brazil

<sup>4</sup> UniCesumar, Maringá, Paraná, Brazil

<sup>5</sup> Union of Catholic Colleges of Mato Grosso, Cuiabá, Mato Grosso, Brazil

Corresponding Author:

Professor Sandra Marisa Peloso

Av. Colombo, 5,790 - Bloco 126, Maringá, Paraná, 87030-230, Brazil

Email address: smpeloso@gmail.com

Variables classified as nearly zero variance were removed, meaning they were not used in the Random Forest and Logistic Regression models.

**Table 1.** Zero and almost zero variance

| Variable                    | Frequency ratio | Unique values (%) | Variance null | Almost zero variance |
|-----------------------------|-----------------|-------------------|---------------|----------------------|
| Age                         | 1.000000        | 10.2209945        | FALSE         | FALSE                |
| Sex                         | 1.610108        | 0.4143646         | FALSE         | FALSE                |
| Weight                      | 1.631579        | 4.4198895         | FALSE         | FALSE                |
| Height cm                   | 1.057143        | 2.6243094         | FALSE         | FALSE                |
| BMI                         | 1.000000        | 9.8066298         | FALSE         | FALSE                |
| Unit Outcome                | 1.733840        | 0.2762431         | FALSE         | FALSE                |
| Decision on palliative care | 119.000000      | 0.4143646         | FALSE         | TRUE                 |
| Length of stay in ICU       | 1.022222        | 6.3535912         | FALSE         | FALSE                |
| Length of hospital stay     | 1.131579        | 8.4254144         | FALSE         | FALSE                |
| NYHA Classification 2 or 3  | 10.040816       | 0.2762431         | FALSE         | FALSE                |

**Table 1.** Zero and almost zero variance

| <b>Variable</b>                         | <b>Frequency ratio</b> | <b>Unique values (%)</b> | <b>Variance null</b> | <b>Variance almost zero</b> |
|-----------------------------------------|------------------------|--------------------------|----------------------|-----------------------------|
| Non-dialysis chronic renal failure      | 18.321429              | 0.2762431                | FALSE                | FALSE                       |
| Dialysis Chronic Renal Failure          | 269.500000             | 0.2762431                | FALSE                | TRUE                        |
| Cirrhosis Child A or B                  | 179.333333             | 0.2762431                | FALSE                | TRUE                        |
| Cirrhosis Child C                       | 540,000000             | 0.2762431                | FALSE                | TRUE                        |
| Liver Failure                           | 134.250000             | 0.2762431                | FALSE                | TRUE                        |
| Locoregional solid tumor                | 53.100000              | 0.2762431                | FALSE                | TRUE                        |
| Metastatic Solid Tumor                  | 540,000000             | 0.2762431                | FALSE                | TRUE                        |
| Tumor site                              | 2,000000               | 0.8287293                | FALSE                | FALSE                       |
| Malignant hematological disease         | 107.200000             | 0.2762431                | FALSE                | TRUE                        |
| Type of malignant hematological disease | 3,000000               | 0.4143646                | FALSE                | FALSE                       |
| Name of malignant hematological disease | 3,000000               | 0.4143646                | FALSE                | FALSE                       |
| Immunosuppression                       | 48.181818              | 0.2762431                | FALSE                | TRUE                        |
| severe COPD                             | 13.236842              | 0.2762431                | FALSE                | FALSE                       |
| Use of Steoids                          | 269.500000             | 0.2762431                | FALSE                | TRUE                        |
| AIDS                                    | 269.500000             | 0.2762431                | FALSE                | TRUE                        |
| Systemic Arterial Hypertension          | 2.339506               | 0.2762431                | FALSE                | FALSE                       |
| Asthma                                  | 26.050000              | 0.2762431                | FALSE                | TRUE                        |
| Uncomplicated diabetes                  | 2.005556               | 0.2762431                | FALSE                | FALSE                       |
| Complicated diabetes                    | 12.195122              | 0.2762431                | FALSE                | FALSE                       |
| Angina                                  | 269.500000             | 0.2762431                | FALSE                | TRUE                        |
| Previous Acute Myocardial Infarction    | 32.812500              | 0.2762431                | FALSE                | TRUE                        |
| Arrhythmia                              | 66.625000              | 0.2762431                | FALSE                | TRUE                        |
| Peripheral Artery Disease               | 179.333333             | 0.2762431                | FALSE                | TRUE                        |

**Table 1.** Zero and almost zero variance

| <b>Variable</b>                          | <b>Frequency ratio</b> | <b>Unique values (%)</b> | <b>Variance null</b> | <b>Variance almost zero</b> |
|------------------------------------------|------------------------|--------------------------|----------------------|-----------------------------|
| Chronic arterial fibrillation            | 40.615385              | 0.2762431                | FALSE                | TRUE                        |
| Rheumatic Disease                        | 107.200000             | 0.2762431                | FALSE                | TRUE                        |
| Stroke sequelae                          | 29.055556              | 0.2762431                | FALSE                | TRUE                        |
| Stroke without sequelae                  | 107.200000             | 0.2762431                | FALSE                | TRUE                        |
| Insanity                                 | 26.050000              | 0.2762431                | FALSE                | TRUE                        |
| Smoking                                  | 21.541667              | 0.2762431                | FALSE                | TRUE                        |
| Alcoholism                               | 53.100000              | 0.2762431                | FALSE                | TRUE                        |
| Psychiatric Illness                      | 9.018519               | 0.2762431                | FALSE                | FALSE                       |
| Morbid obesity                           | 3.918182               | 0.2762431                | FALSE                | FALSE                       |
| Malnutrition                             | 89.166667              | 0.2762431                | FALSE                | TRUE                        |
| Solid Organ Transplant                   | 269.500000             | 0.2762431                | FALSE                | TRUE                        |
| Autologous blood transfusion             | 540,000000             | 0.2762431                | FALSE                | TRUE                        |
| Intestine Transplant                     | 134.250000             | 0.2762431                | FALSE                | TRUE                        |
| Lung transplant                          | 540,000000             | 0.2762431                | FALSE                | TRUE                        |
| kidney transplant                        | 134.250000             | 0.2762431                | FALSE                | TRUE                        |
| Hypothyroidism                           | 9.018519               | 0.2762431                | FALSE                | FALSE                       |
| Hyperthyroidism                          | 540,000000             | 0.2762431                | FALSE                | TRUE                        |
| Dyslipidemia                             | 32.812500              | 0.2762431                | FALSE                | TRUE                        |
| Chemotherapy                             | 179.333333             | 0.2762431                | FALSE                | TRUE                        |
| Radiotherapy                             | 269.500000             | 0.2762431                | FALSE                | TRUE                        |
| History of Pneumonia                     | 134.250000             | 0.2762431                | FALSE                | TRUE                        |
| Delirium Obnubilation Stupor or With the | 4.658730               | 0.2762431                | FALSE                | FALSE                       |
| Seizures or Epilepsy                     | 355.500000             | 0.2762431                | FALSE                | TRUE                        |
| Focal neurological deficit               | 355.500000             | 0.2762431                | FALSE                | TRUE                        |

**Table 1.** Zero and almost zero variance

| <b>Variable</b>                                     | <b>Frequency ratio</b> | <b>Unique values (%)</b> | <b>Variance null</b> | <b>Variance almost zero</b> |
|-----------------------------------------------------|------------------------|--------------------------|----------------------|-----------------------------|
| Hypovolemic or hemorrhagic shock                    | 712,000000             | 0.2762431                | FALSE                | TRUE                        |
| Septic shock                                        | 70.300000              | 0.2762431                | FALSE                | TRUE                        |
| Heart Rhythm Disorders                              | 78.222222              | 0.2762431                | FALSE                | TRUE                        |
| Anaphylactic or undefined shock                     | 712,000000             | 0.2762431                | FALSE                | TRUE                        |
| Neurosurgery                                        | 712,000000             | 0.2762431                | FALSE                | TRUE                        |
| Respiratory failure in the first hour               | 4.974790               | 0.2762431                | FALSE                | FALSE                       |
| Mechanical Ventilation in the First Hour            | 1.402027               | 0.2762431                | FALSE                | FALSE                       |
| Non-invasive ventilation in the first hour          | 2.276498               | 0.2762431                | FALSE                | FALSE                       |
| Vasopressors in the first hour                      | wha1.594891            | 0.2762431                | FALSE                | FALSE                       |
| Cardiac arrhythmias in the first hour               | 78.000000              | 0.2762431                | FALSE                | TRUE                        |
| Cardiorespiratory arrest in the first hour          | 63.636364              | 0.2762431                | FALSE                | TRUE                        |
| Acute kidney injury in the first hour               | 100.571429             | 0.2762431                | FALSE                | TRUE                        |
| Hemodialysis in the first hour                      | 78.000000              | 0.2762431                | FALSE                | TRUE                        |
| Asystole in the first hour                          | 176.750000             | 0.2762431                | FALSE                | TRUE                        |
| Pulseless electrical activity in the first hour     | 100.571429             | 0.2762431                | FALSE                | TRUE                        |
| Atrial fibrillation in the first hour               | 176.750000             | 0.2762431                | FALSE                | TRUE                        |
| Sustained ventricular tachycardia in the first hour | 710,000000             | 0.2762431                | FALSE                | TRUE                        |
| Acute respiratory failure in the first hour         | 1.672932               | 0.2762431                | FALSE                | FALSE                       |
| Mechanical ventilation                              | 1.821429               | 0.2762431                | FALSE                | FALSE                       |
| Non-invasive ventilation                            | 1.672932               | 0.2762431                | FALSE                | FALSE                       |

**Table 1.** Zero and almost zero variance

| Variable                          | Frequency ratio | Unique values (%) | Variance null | Variance almost zero |
|-----------------------------------|-----------------|-------------------|---------------|----------------------|
| Vasopressors                      | 1.410169        | 0.2762431         | FALSE         | FALSE                |
| Arrhythmias                       | 70.100000       | 0.2762431         | FALSE         | TRUE                 |
| Cardiorespiratory Arrest          | 38.500000       | 0.2762431         | FALSE         | TRUE                 |
| Acute Kidney Injury               | 100.571429      | 0.2762431         | FALSE         | TRUE                 |
| Hemodialysis                      | 63.636364       | 0.2762431         | FALSE         | TRUE                 |
| Asystole                          | 58.250000       | 0.2762431         | FALSE         | TRUE                 |
| Pulseless electrical activity     | 78.000000       | 0.2762431         | FALSE         | TRUE                 |
| Atrial fibrillation               | 176.750000      | 0.2762431         | FALSE         | TRUE                 |
| Sustained ventricular tachycardia | 354.500000      | 0.2762431         | FALSE         | TRUE                 |
| Lowest SBP 1h                     | 1.071429        | 16.5745856        | FALSE         | FALSE                |
| Lowest PAD 1h                     | 1.000000        | 12.1546961        | FALSE         | FALSE                |
| Lowest MAP 1h                     | 1.000000        | 29.8342541        | FALSE         | FALSE                |
| Highest HR 1h                     | 1.277778        | 13.6740331        | FALSE         | FALSE                |
| Highest FR 1h                     | 2.206349        | 5.2486188         | FALSE         | FALSE                |
| Highest Temperature 1h            | 2.581395        | 8.0110497         | FALSE         | FALSE                |
| Minor Glasgow Coma Scale 1h       | 2.035088        | 1.2430939         | FALSE         | FALSE                |
| Higher leukocyte count 1h         | 1.000000        | 42.5414365        | FALSE         | FALSE                |
| Lower Platelet Count 1h           | 1.000000        | 44.8895028        | FALSE         | FALSE                |
| Highest creatinine 1h             | 1.000000        | 7.5966851         | FALSE         | FALSE                |
| Higher Bilirubin 1h               | 1.142857        | 2.3480663         | FALSE         | FALSE                |
| Higher PH 1h                      | 1.236842        | 8.5635359         | FALSE         | FALSE                |
| Lower PH1h                        | 1.000000        | 6.7679558         | FALSE         | FALSE                |
| Highest PaO2 1h                   | 1.000000        | 19.0607735        | FALSE         | FALSE                |
| Lowest PaO2 1h                    | 1.428571        | 10.6353591        | FALSE         | FALSE                |
| Higher PaCO21h                    | 1.250000        | 11.6022099        | FALSE         | FALSE                |

**Table 1.** Zero and almost zero variance

| Variable                                     | Frequency ratio | Unique values (%) | Variance null | Variance almost zero |
|----------------------------------------------|-----------------|-------------------|---------------|----------------------|
| Lowest PaCO2 1h                              | 1.181818        | 7.1823204         | FALSE         | FALSE                |
| Highest Fi O21h                              | 1.341085        | 4.0055249         | FALSE         | FALSE                |
| Lowest Fi O21h                               | 1.045455        | 4.8342541         | FALSE         | FALSE                |
| Higher PaO2Fi O21h Ratio                     | 1.000000        | 43.9226519        | FALSE         | FALSE                |
| Lowest PaO2FiO2 Ratio 1h                     | 1.000000        | 19.8895028        | FALSE         | FALSE                |
| Highest Lactate 1h                           | 1.727273        | 4.2817680         | FALSE         | FALSE                |
| Urea                                         | 1.058824        | 21.9613260        | FALSE         | FALSE                |
| BUN                                          | 1.058824        | 21.9613260        | FALSE         | FALSE                |
| Non-invasive mechanical ventilation          | 1.559140        | 0.2762431         | FALSE         | FALSE                |
| Failure of non-invasive ventilation          | 4.368421        | 0.2762431         | FALSE         | FALSE                |
| Mechanical ventilation                       | 5.318584        | 0.2762431         | FALSE         | FALSE                |
| Duration of mechanical ventilation           | 1.000000        | 5.9392265         | FALSE         | FALSE                |
| Tracheostomy                                 | 4.028169        | 0.2762431         | FALSE         | FALSE                |
| High flow mask                               | 356,000000      | 0.2762431         | FALSE         | TRUE                 |
| Duration of Hemodialysis                     | 1.117647        | 3.5911602         | FALSE         | FALSE                |
| Extended Hemodialysis in Acute Kidney Injury | 129.000000      | 0.2762431         | FALSE         | TRUE                 |
| Ischemic Heart Disease                       | 129.000000      | 0.2762431         | FALSE         | TRUE                 |
| Central Venous Catheter                      | 5.672897        | 0.2762431         | FALSE         | FALSE                |
| Indwelling bladder catheter                  | 7.022472        | 0.2762431         | FALSE         | FALSE                |
| PAM catheter                                 | 2.718750        | 0.2762431         | FALSE         | FALSE                |
| Intraaortic balloon                          | 713.000000      | 0.2762431         | FALSE         | TRUE                 |
| Minimally invasive hemodynamic monitoring    | 118,000000      | 0.2762431         | FALSE         | TRUE                 |
| Transfusion                                  | 9.500000        | 0.2762431         | FALSE         | FALSE                |
| Red blood cell concentrate                   | 12.730769       | 0.2762431         | FALSE         | FALSE                |

**Table 1.** Zero and almost zero variance

| Variable            | Frequency ratio | Unique values (%) | Variance null | Variance almost zero |
|---------------------|-----------------|-------------------|---------------|----------------------|
| Fresh Frozen Plasma | 58.500000       | 0.2762431         | FALSE         | TRUE                 |
| Thrombolytic Agents | 356,000000      | 0.2762431         | FALSE         | TRUE                 |

In Table 2, we present the missing values per variable. Note that some variables have more than 99% missing values. All variables with more than 50% missing values were eliminated.

**Table 2.** Missing values per variable

| Variable                                | Amount       |
|-----------------------------------------|--------------|
| Type of malignant hematological disease | 719 (99.31%) |
| Name of malignant hematological disease | 719 (99.31%) |
| Tumor site                              | 713 (98.48%) |
| Higher Bilirubin 1h                     | 644 (88.95%) |
| Highest Lactate 1h                      | 601 (83.01%) |
| Duration of Hemodialysis                | 594 (82.04%) |
| Height cm                               | 565 (78.04%) |
| BMI                                     | 565 (78.04%) |
| Weight                                  | 561 (77.49%) |
| Lowest Fi O21h                          | 540 (74.59%) |
| Lowest PaO2FiO2 Ratio 1h                | 540 (74.59%) |
| Lower PH1h                              | 533 (73.62%) |
| Lowest PaO2 1h                          | 533 (73.62%) |
| Lowest PaCO2 1h                         | 533 (73.62%) |
| Minor Glasgow Coma Scale 1h             | 516 (71.27%) |
| NYHA Classification 2 or 3              | 183 (25.28%) |
| Non-dialysis chronic renal failure      | 183 (25.28%) |

**Table 2.** Missing values per variable

| <b>Variable</b>                                    | <b>Amount</b> |
|----------------------------------------------------|---------------|
| severe COPD                                        | 183 (25.28%)  |
| Systemic Arterial Hypertension                     | 183 (25.28%)  |
| Uncomplicated diabetes                             | 183 (25.28%)  |
| Complicated diabetes                               | 183 (25.28%)  |
| Psychiatric Illness                                | 183 (25.28%)  |
| Morbid obesity                                     | 183 (25.28%)  |
| Hypothyroidism                                     | 183 (25.28%)  |
| Higher PaO <sub>2</sub> Fi O <sub>2</sub> 1h Ratio | 161 (22.24%)  |
| Highest Fi O <sub>2</sub> 1h                       | 159 (21.96%)  |
| Duration of mechanical ventilation                 | 123 (16.99%)  |
| Urea                                               | 84 (11.6%)    |
| BUN                                                | 84 (11.6%)    |
| Lower Platelet Count 1h                            | 74 (10.22%)   |
| Highest creatinine 1h                              | 73 (10.08%)   |
| Higher PH 1h                                       | 72 (9.94%)    |
| Highest PaO <sub>2</sub> 1h                        | 71 (9.81%)    |
| Higher PaCO <sub>2</sub> 1h                        | 71 (9.81%)    |
| Higher leukocyte count 1h                          | 70 (9.67%)    |
| Lowest SBP 1h                                      | 34 (4.7%)     |
| Lowest PAD 1h                                      | 34 (4.7%)     |
| Lowest MAP 1h                                      | 34 (4.7%)     |
| Highest FR 1h                                      | 34 (4.7%)     |
| Highest HR 1h                                      | 33 (4.56%)    |
| Highest Temperature 1h                             | 33 (4.56%)    |
| Respiratory failure in the first hour              | 13 (1.8%)     |
| Mechanical Ventilation in the First Hour           | 13 (1.8%)     |



**Table 2.** Missing values per variable

| <b>Variable</b>                             | <b>Amount</b> |
|---------------------------------------------|---------------|
| Non-invasive ventilation in the first hour  | 13 (1.8%)     |
| Vasopressors in the first hour              | 13 (1.8%)     |
| Acute respiratory failure in the first hour | 13 (1.8%)     |
| Mechanical ventilation                      | 13 (1.8%)     |
| Non-invasive ventilation                    | 13 (1.8%)     |
| Vasopressors                                | 13 (1.8%)     |
| Delirium Obnubilation Stupor or Coma        | 11 (1.52%)    |
| Non-invasive mechanical ventilation         | 10 (1.38%)    |
| Failure of non-invasive ventilation         | 10 (1.38%)    |
| Mechanical ventilation                      | 10 (1.38%)    |
| Tracheostomy                                | 10 (1.38%)    |
| Central Venous Catheter                     | 10 (1.38%)    |
| Indwelling bladder catheter                 | 10 (1.38%)    |
| PAM catheter                                | 10 (1.38%)    |
| Transfusion                                 | 10 (1.38%)    |
| Red blood cell concentrate                  | 10 (1.38%)    |
| Unit Outcome                                | 5 (0.69%)     |
| Age                                         | 0 (0%)        |
| Sex                                         | 0 (0%)        |
| Length of stay in ICU                       | 0 (0%)        |
| Length of hospital stay                     | 0 (0%)        |

Table 3 presents the information gain per variable. The variables that stand out the most are the use and duration of mechanical ventilation. Additionally, approximately 37% of the predictor variables show no information gain. Those with null information gain were eliminated

**Table 3.** Information gain per variable

| <b>Variable</b>                             | <b>Information gain</b> |
|---------------------------------------------|-------------------------|
| Duration of mechanical ventilation          | 127.768816278           |
| Mechanical ventilation                      | 111.471292165           |
| Central Venous Catheter                     | 62.573210305            |
| Indwelling bladder catheter                 | 55.673934628            |
| Length of hospital stay                     | 43.551346100            |
| PAM catheter                                | 28.408457968            |
| Urea                                        | 27.628248354            |
| BUN                                         | 27.628248354            |
| Mechanical ventilation                      | 22.191547442            |
| Age                                         | 20.336069126            |
| Vasopressors                                | 19.573846271            |
| Highest creatinine 1h                       | 18.157034301            |
| Vasopressors in the first hour              | 14.328282383            |
| Mechanical Ventilation in the First Hour    | 12.502919939            |
| Tracheostomy                                | 8.840356153             |
| Sex                                         | 7.161870971             |
| Acute respiratory failure in the first hour | 4.694937498             |
| Systemic Arterial Hypertension              | 4.241766944             |
| Non-invasive ventilation                    | 3.962484574             |
| Non-invasive ventilation in the first hour  | 2.846713391             |
| Respiratory failure in the first hour       | 2.800651983             |
| Morbid obesity                              | 2.475677719             |
| Non-invasive mechanical ventilation         | 2.319309057             |
| Transfusion                                 | 2.189537788             |
| Failure of non-invasive ventilation         | 1.466486287             |
| Red blood cell concentrate                  | 1.136906646             |

**Table 3.** Information gain per variable

| <b>Variable</b>                      | <b>Information gain</b> |
|--------------------------------------|-------------------------|
| severe COPD                          | 1.112180520             |
| Complicated diabetes                 | 1.052839037             |
| Hypothyroidism                       | 0.544533371             |
| Delirium Obnubilation Stupor or Coma | 0.525168608             |
| Uncomplicated diabetes               | 0.389778122             |
| Non-dialysis chronic renal failure   | 0.055503605             |
| Psychiatric Illness                  | 0.021600816             |
| NYHA Classification 2 or 3           | 0.004103402             |
| Length of stay in ICU                | 0.000000000             |
| Lowest SBP 1h                        | 0.000000000             |
| Lowest PAD 1h                        | 0.000000000             |
| Lowest MAP 1h                        | 0.000000000             |
| Highest HR 1h                        | 0.000000000             |
| Highest FR 1h                        | 0.000000000             |
| Highest Temperature 1h               | 0.000000000             |
| Higher leukocyte count 1h            | 0.000000000             |
| Lower Platelet Count 1h              | 0.000000000             |
| Higher PH 1h                         | 0.000000000             |
| Highest PaO2 1h                      | 0.000000000             |
| Higher PaCO21h                       | 0.000000000             |
| Highest Fi O21h                      | 0.000000000             |
| Higher PaO2Fi O21h Ratio             | 0.000000000             |

In Table 4, variables are shown that were eliminated when the area under the curve was less than 0.51.

**Table 4.** Area under the curve by variable

| <b>Variable</b>                             | <b>Area under the ROC curve</b> |
|---------------------------------------------|---------------------------------|
| Duration of mechanical ventilation          | 0.7503002                       |
| Mechanical ventilation                      | 0.6796403                       |
| Length of hospital stay                     | 0.6544217                       |
| Urea                                        | 0.6337603                       |
| BUN                                         | 0.6337603                       |
| Central Venous Catheter                     | 0.6317896                       |
| PAM catheter                                | 0.6124523                       |
| Indwelling bladder catheter                 | 0.6091883                       |
| Age                                         | 0.6064786                       |
| Mechanical ventilation                      | 0.5923836                       |
| Highest creatinine 1h                       | 0.5881882                       |
| Vasopressors                                | 0.5875878                       |
| Vasopressors in the first hour              | 0.5695668                       |
| Mechanical Ventilation in the First Hour    | 0.5644553                       |
| Sex                                         | 0.5501601                       |
| Tracheostomy                                | 0.5498214                       |
| Systemic Arterial Hypertension              | 0.5447869                       |
| Non-invasive ventilation                    | 0.5330860                       |
| Morbid obesity                              | 0.5302146                       |
| Non-invasive mechanical ventilation         | 0.5270969                       |
| Acute respiratory failure in the first hour | 0.5258268                       |
| Non-invasive ventilation in the first hour  | 0.5175206                       |
| Transfusion                                 | 0.5171819                       |
| Failure of non-invasive ventilation         | 0.5166892                       |
| Uncomplicated diabetes                      | 0.5138564                       |
| Complicated diabetes                        | 0.5126016                       |

**Table 4.** Area under the curve by variable

| <b>Variable</b>                       | <b>Area under the ROC curve</b> |
|---------------------------------------|---------------------------------|
| severe COPD                           | 0.5124861                       |
| Hypothyroidism                        | 0.5103461                       |
| Delirium Obnubilation Stupor or Coma  | 0.5092992                       |
| Red blood cell concentrate            | 0.5084370                       |
| Non-dialysis chronic renal failure    | 0.5024557                       |
| Psychiatric Illness                   | 0.5020785                       |
| Respiratory failure in the first hour | 0.5009161                       |
| NYHA Classification 2 or 3            | 0.5008699                       |

Figure 1 presents the Pearson correlation analysis. Variables with a correlation greater than 0.75 were eliminated.

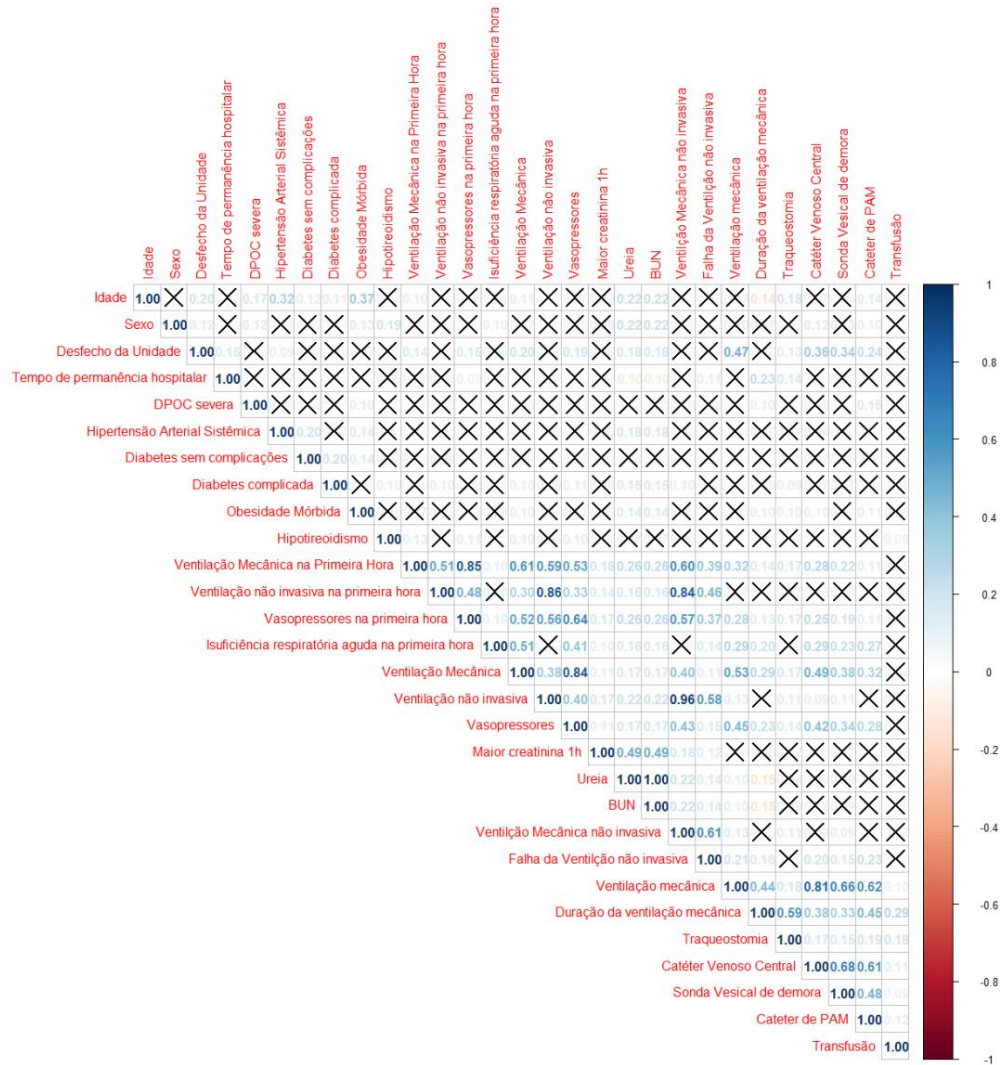

## Association Rules

Association rules analysis is a technique for discovering how items are associated with each other (ZHAO; ZHANG; CAO, 2009).

The association rules were obtained by the apriori algorithm (ZHAO; ZHANG; CAO, 2009, p. 4) implemented by the arules library (HAHLER, 2021) in R (TEAM, 2013). To use this algorithm it is necessary to convert the data set to a transaction database and the continuous variables need to be discretized, that is, dividing the values into intervals. Thus, age was divided into three categories: 0 to 55 years, 56 to 68 years and 69 to 95 years, length of hospital stay from 1 to 8, 9 to 17 and 18 to 522; highest 1h creatinine below 0.6, greater than or equal to 0.6 and less than 1 and from 1 to 28; BUN less than 21.5, greater than or equal to 21.5 and less than 34.7 and from 34.7 to 204; duration of mechanical ventilation

0 to 3, 4 to 11 and 12 to 60. The discretizations were made in order to have approximately the same number of samples in each class. Table 1 presents the first two transactions.

**Table 1.** Transaction database

| ## items ##                                                                                                                                                                                                                                                                                                                                                                                                                                                                                                                                                                                                                                                                                                                                                                                     | transactionID |
|-------------------------------------------------------------------------------------------------------------------------------------------------------------------------------------------------------------------------------------------------------------------------------------------------------------------------------------------------------------------------------------------------------------------------------------------------------------------------------------------------------------------------------------------------------------------------------------------------------------------------------------------------------------------------------------------------------------------------------------------------------------------------------------------------|---------------|
| [1] {Age=[56.69], ## Sex=F,<br>## Unit<br>Outcome=Discharge, ## Length of hospital<br>stay=[9.18], ## Severe COPD=False , ## Systemic Arterial<br>Hypertension=True, ##<br>Uncomplicated Diabetes=False, ## Complicated<br>Diabetes=False, ## Morbid Obesity=True, ##<br>Hypothyroidism=True, ## Non-invasive<br>ventilation in the first hour=False, ##<br>Vasopressors in the first hour=False, ##<br>Acute respiratory failure in the first hour=False, ##<br>Vasopressors=False, ## Highest creatinine 1h=[0.6,1),<br>## BUN=[0,21.5), ## Failure of Non-invasive ventilation=False, ## Duration<br>of mechanical ventilation=[0.4),<br>## Tracheostomy=False, ## Central<br>Venous Catheter=False,<br>## Indwelling Bladder Catheter=True, ## MAP<br>Catheter=False, ## Transfusion=False} | 1             |
| ## [2] {Age=[0.56],<br>## Sex=F, ##<br>Unit Outcome=Discharge, ## Length of<br>hospital stay=[18.522], ## Severe COPD=False, ##<br>Arterial Hypertension<br>Systemic=False, ## Uncomplicated<br>diabetes=False, ## Complicated<br>diabetes=True, ## Morbid obesity=False,<br>## Hypothyroidism=False, ## Non-<br>invasive ventilation in the first<br>hour=False, ## Vasopressors in the first hour= False,<br>## Acute respiratory failure in the first<br>hour=True, ## Vasopressors=True, ## Highest creatinine 1h=[0.2,0.6),<br>## BUN=[0.21.5), ## Failure of<br>non-invasive ventilation=False , ##<br>Duration of mechanical<br>ventilation=[12.60], ## Tracheostomy=False, ##<br>Central Venous Catheter=True, ## Indwelling<br>Bladder Catheter=True,                                  |               |

```
## MAP Catheter=True,  
## Transfusion=True}
```

two

Source: prepared by the author.

### Mined association rules

The graph below represents the rules and their respective confidence levels, it can be generated interactively where we can hover the mouse and see the best rules (in this case the ideal ones based on confidence since we sort the data before creating the graph) . If it is interesting for your research, just let me know.

```
## Available control parameters (with default values):  
## interactive = TRUE  
## engine = htmlwidget  
## max = 1000  
## colors = c("#EE0000FF", "#EEEEEEFF")  
## jitter = NA  
## precision = 3  
## main = Unused  
## marker = list()  
## verbose = FALSE
```

**Figure 2.** Association rules and trust level

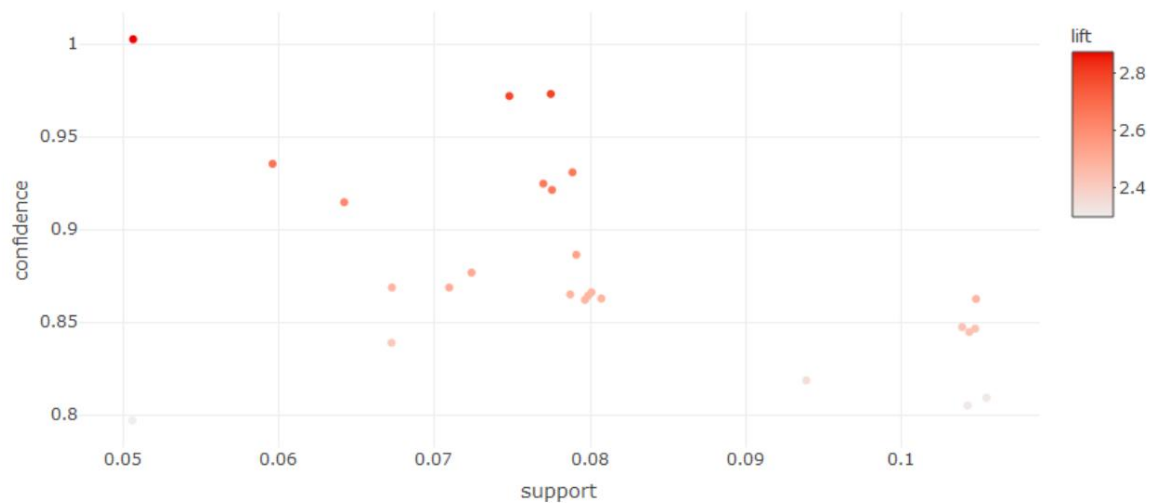



**Table 5.** Factors associated with the Discharge outcome

| Lhs - factors                                                                   | RHS - outcome                      | Support        | Trust<br>here | Covered<br>frog | Lift         | Quantity<br>in |
|---------------------------------------------------------------------------------|------------------------------------|----------------|---------------|-----------------|--------------|----------------|
| {Highest creatinine<br>1h=[0.6,1), Bladder catheter<br>delay=False}             | {Outcome of<br>Unit=Discha<br>rge} | 0.050314<br>47 | 1.00000<br>00 | 0.050314<br>47  | 2.8734<br>94 | 24             |
| {Indwelling Bladder<br>Probe=False, Indwelling Catheter<br>PAM=False}           | {Outcome of<br>Unit=Discha<br>rge} | 0.077568<br>13 | 0.97368<br>42 | 0.079664<br>57  | 2.7978<br>76 | 37             |
| {Venous Catheter<br>Central=False,Probe<br>Bladder delay=False}                 | {Outcome of<br>Unit=Discha<br>rge} | 0.075471<br>70 | 0.97297<br>30 | 0.077568<br>13  | 2.7958<br>32 | 36             |
| {Arterial hypertension<br>Systemic=True,Sound<br>bladder<br>delay=False}        | {Outcome of<br>Unit=Discha<br>rge} | 0.058700<br>21 | 0.93333<br>33 | 0.062893<br>08  | 2.6819<br>28 | 28             |
| {Duration of mechanical<br>ventilation=[0.4),Probe<br>Bladder delay=False}      | {Outcome of<br>Unit=Discha<br>rge} | 0.079664<br>57 | 0.92682<br>93 | 0.085953<br>88  | 2.6632<br>38 | 38             |
| {Vasopressors=False, Son<br>bladder<br>delay=False}                             | {Outcome of<br>Unit=Discha<br>rge} | 0.077568<br>13 | 0.92500<br>00 | 0.083857<br>44  | 2.6579<br>82 | 37             |
| {Vasopressors in the first<br>hour=False, indwelling<br>bladder catheter=False} | {Outcome of<br>Unit=Discha<br>rge} | 0.077568<br>13 | 0.92500<br>00 | 0.083857<br>44  | 2.6579<br>82 | 37             |
| {Highest creatinine<br>1h=[0.6,1),Central Venous<br>Catheter=False}             | {Outcome of<br>Unit=Discha<br>rge} | 0.064989<br>52 | 0.91176<br>47 | 0.071278<br>83  | 2.6199<br>50 | 31             |
| {Indwelling bladder<br>catheter=False,Transfusion=<br>False}                    | {Outcome of<br>Unit=Discha<br>rge} | 0.079664<br>57 | 0.88372<br>09 | 0.090146<br>75  | 2.5393<br>67 | 38             |
| {severe<br>COPD=False,Probe<br>Bladder delay=False}                             | {Outcome of<br>Unit=Discha<br>rge} | 0.073375<br>26 | 0.87500<br>00 | 0.083857<br>44  | 2.5143<br>07 | 35             |
| {Hypothyroidism=False, So<br>nda Bladder<br>delay=False}                        | {Outcome of<br>Unit=Discha<br>rge} | 0.071278<br>83 | 0.87179<br>49 | 0.081761<br>01  | 2.5050<br>97 | 34             |

**Table 5.** Factors associated with the Discharge outcome

| Lhs - factors                                                                                   | RHS - outcome                      | Support        | Trust<br>here | Covered<br>frog | Lift         | Quantity<br>in |
|-------------------------------------------------------------------------------------------------|------------------------------------|----------------|---------------|-----------------|--------------|----------------|
| {Obesity<br>Morbid=False,Probe<br>Bladder delay=False}                                          | {Outcome of<br>Unit=Discha<br>rge} | 0.067085<br>95 | 0.86486<br>49 | 0.077568<br>13  | 2.4851<br>84 | 32             |
| {Indwelling bladder<br>catheter=False}                                                          | {Outcome of<br>Unit=Discha<br>rge} | 0.079664<br>57 | 0.86363<br>64 | 0.092243<br>19  | 2.4816<br>54 | 38             |
| {Acute respiratory failure in<br>the first hour=False,<br>Indwelling urinary<br>catheter=False} | {Outcome of<br>Unit=Discha<br>rge} | 0.079664<br>57 | 0.86363<br>64 | 0.092243<br>19  | 2.4816<br>54 | 38             |
| {Non-Invasive Ventilation<br>Failure=False,Probe<br>Bladder delay=False}                        | {Outcome of<br>Unit=Discha<br>rge} | 0.079664<br>57 | 0.86363<br>64 | 0.092243<br>19  | 2.4816<br>54 | 38             |
| {Tracheostomy=False, Son<br>bladder<br>delay=False}                                             | {Outcome of<br>Unit=Discha<br>rge} | 0.079664<br>57 | 0.86363<br>64 | 0.092243<br>19  | 2.4816<br>54 | 38             |
| {Complicated diabetes=False,Probe<br>Bladder delay=False}                                       | {Outcome of<br>Unit=Discha<br>rge} | 0.079664<br>57 | 0.86363<br>64 | 0.092243<br>19  | 2.4816<br>54 | 38             |
| {Duration of mechanical<br>ventilation=[0.4],Catheter<br>Central Venous=False}                  | {Outcome of<br>Unit=Discha<br>rge} | 0.104821<br>80 | 0.86206<br>90 | 0.121593<br>29  | 2.4771<br>50 | 50             |
| {Venous Catheter<br>Central=False, Catheter<br>PAM=False}                                       | {Outcome of<br>Unit=Discha<br>rge} | 0.104821<br>80 | 0.84745<br>76 | 0.123689<br>73  | 2.4351<br>64 | 50             |
| {Vasopressors=False,Caté<br>have Central Venous=False}                                          | {Outcome of<br>Unit=Discha<br>rge} | 0.104821<br>80 | 0.84745<br>76 | 0.123689<br>73  | 2.4351<br>64 | 50             |
| {Vasopressors in the first<br>hour=False, Venous Catheter<br>Central=False}                     | {Outcome of<br>Unit=Discha<br>rge} | 0.104821<br>80 | 0.84745<br>76 | 0.123689<br>73  | 2.4351<br>64 | 50             |
| {Non-invasive ventilation in<br>the first<br>hour=False, Venous Catheter<br>Central=False}      | {Outcome of<br>Unit=Discha<br>rge} | 0.067085<br>95 | 0.84210<br>53 | 0.079664<br>57  | 2.4197<br>84 | 32             |

**Table 5.** Factors associated with the Discharge outcome

| Lhs - factors                                       | RHS - outcome               | Support        | Trust<br>here | Covered<br>frog | Lift         | Quantity<br>in |
|-----------------------------------------------------|-----------------------------|----------------|---------------|-----------------|--------------|----------------|
| {Severe COPD=False,Catheter Central Venous=False}   | {Outcome of Unit=Discharge} | 0.094339<br>62 | 0.81818<br>18 | 0.115303<br>98  | 2.3510<br>41 | 45             |
| {Tracheostomy=False,Cat Central Venous Ether=False} | {Outcome of Unit=Discharge} | 0.104821<br>80 | 0.80645<br>16 | 0.129979<br>04  | 2.3173<br>34 | 50             |
| {Venous Catheter Central=False,Transfusion=False}   | {Outcome of Unit=Discharge} | 0.104821<br>80 | 0.80645<br>16 | 0.129979<br>04  | 2.3173<br>34 | 50             |
| {BUN=[21.5,34.7],Central Venous Catheter=False}     | {Outcome of Unit=Discharge} | 0.050314<br>47 | 0.80000<br>00 | 0.062893<br>08  | 2.2987<br>95 | 24             |

Source: prepared by the author.

Table 5 highlights sets of characteristics that are associated with patients' Discharge. For example, in rule 2 we can see that there is an association between a urinary bladder probe (false) and a MAP catheter (false) with Discharge. For this association rule we have a support of 0.077, which represents 37 (count) patients (7.7% of the total). The confidence column represents the confidence of this rule, where 0.9736 represents 97.36%, that is, 97.36% of patients with a urinary bladder catheter (false) and MAP catheter (false) had Discharge. Furthermore, the lift (similar to odds) is 2.7978, this means that there is a 179.78% greater chance of having a Discharge.

**Table 6.** Factors associated with the unit outcome being Death

| Lhs - factors                                                                | Rhs - outcome           | Support        | Trust<br>nce  | Cobert<br>ura  | Lift         | Quantity<br>ity |
|------------------------------------------------------------------------------|-------------------------|----------------|---------------|----------------|--------------|-----------------|
| {Hospital length of stay=[9,18], Duration of mechanical ventilation=[12,60]} | {Outcome of Unit=Death} | 0.10062<br>893 | 0.9795<br>918 | 0.10272<br>537 | 1,502<br>461 | 48              |
| {Hospital length of stay=[9,18],Non-invasive Ventilation Failure=True}       | {Outcome of Unit=Death} | 0.06289<br>308 | 0.9375<br>000 | 0.06708<br>595 | 1,437<br>902 | 30              |

**Table 6.** Factors associated with the unit outcome being Death

| Lhs - factors                                                             | Rhs - outcome            | Support **     | Trust nce     | Cobertura      | Lift         | Quantity |
|---------------------------------------------------------------------------|--------------------------|----------------|---------------|----------------|--------------|----------|
| {Hospital length of stay=[9,18),BUN=[34.7,204]}                           | {Outcome of Unit=D eath} | 0.11320<br>755 | 0.9310<br>345 | 0.12159<br>329 | 1,427<br>985 | 54       |
| {Hospital length of stay=[9,18],Highest creatinine 1h=[1.28]}             | {Outcome of Unit=D eath} | 0.10062<br>893 | 0.9230<br>769 | 0.10901<br>468 | 1,415<br>780 | 48       |
| {BUN=[21.5,34.7),Non-Invasive Ventilation Failure=True}                   | {Outcome of Unit=D eath} | 0.07337<br>526 | 0.8750<br>000 | 0.08385<br>744 | 1,342<br>042 | 35       |
| {Hospital length of stay=[1.9),Duration of mechanical ventilation=[4.12)} | {Outcome of Unit=D eath} | 0.09853<br>249 | 0.8703<br>704 | 0.11320<br>755 | 1,334<br>941 | 47       |
| {Age=[69.95],Duration of mechanical ventilation=[12.60]}                  | {Outcome of Unit=D eath} | 0.08176<br>101 | 0.8666<br>667 | 0.09433<br>962 | 1,329<br>260 | 39       |
| {Hospital length of stay=[9,18),Catheter PAM=True}                        | {Outcome of Unit=D eath} | 0.23270<br>440 | 0.8604<br>651 | 0.27044<br>025 | 1,319<br>749 | 111      |
| {BUN=[34.7,204],Duration of mechanical ventilation=[4,12)}                | {Outcome of Unit=D eath} | 0.10062<br>893 | 0.8571<br>429 | 0.11740<br>042 | 1,314<br>653 | 48       |
| {Uncomplicated diabetes=True,BUN=[34.7,204]}                              | {Outcome of Unit=D eath} | 0.11111<br>111 | 0.8548<br>387 | 0.12997<br>904 | 1,311<br>119 | 53       |
| {Age=[69.95],Vasopressors=True deiro}                                     | {Outcome of Unit=D eath} | 0.17190<br>776 | 0.8541<br>667 | 0.20125<br>786 | 1,310<br>088 | 82       |

**Table 6.** Factors associated with the unit outcome being Death

| Lhs - factors                                                         | Rhs - outcome                  | Support<br>**  | Trust<br>nce  | Cobert<br>ura  | Lift         | Quantity |
|-----------------------------------------------------------------------|--------------------------------|----------------|---------------|----------------|--------------|----------|
| {Age=[69.95], Acute respiratory failure in the first hour=True}       | {Outcome of<br>Unit=D<br>eath} | 0.10691<br>824 | 0.8500<br>000 | 0.12578<br>616 | 1,303<br>698 | 51       |
| {Hospital length of stay=[9,18], Venous Catheter Center=True}         | {Outcome of<br>Unit=D<br>eath} | 0.25995<br>807 | 0.8493<br>151 | 0.30607<br>966 | 1,302<br>647 | 124      |
| {BUN=[21.5,34.7], Duration of mechanical ventilation=[4,12]}          | {Outcome of<br>Unit=D<br>eath} | 0.08176<br>101 | 0.8478<br>261 | 0.09643<br>606 | 1,300<br>363 | 39       |
| {Age=[69.95], Vasopressors in the first hour=True}                    | {Outcome of<br>Unit=D<br>eath} | 0.10482<br>180 | 0.8474<br>576 | 0.12368<br>973 | 1,299<br>798 | 50       |
| {Hospital length of stay=[9,18], Vasopressors in the first hour=True} | {Outcome of<br>Unit=D<br>eath} | 0.10482<br>180 | 0.8474<br>576 | 0.12368<br>973 | 1,299<br>798 | 50       |
| {Age=[69.95], Duration of mechanical ventilation=[4,12]}              | {Outcome of<br>Unit=D<br>eath} | 0.09224<br>319 | 0.8461<br>538 | 0.10901<br>468 | 1,297<br>799 | 44       |
| {Hospital length of stay=[9,18], Vasopressors=Green adeiro}           | {Outcome of<br>Unit=D<br>eath} | 0.17400<br>419 | 0.8383<br>838 | 0.20754<br>717 | 1,285<br>881 | 83       |
| {Age=[69.95], Catheter PAM=True}                                      | {Outcome of<br>Unit=D<br>eath} | 0.19496<br>855 | 0.8378<br>378 | 0.23270<br>440 | 1,285<br>044 | 93       |
| {Vasopressors=True, BUN=[34.7,204]}                                   | {Outcome of<br>Unit=D<br>eath} | 0.20335<br>430 | 0.8362<br>069 | 0.24318<br>658 | 1,282<br>542 | 97       |

**Table 6.** Factors associated with the unit outcome being Death

| Lhs - factors                                                  | Rhs - outcome                  | Support<br>**  | Trust<br>nce  | Cobert<br>ura  | Lift         | Quantity |
|----------------------------------------------------------------|--------------------------------|----------------|---------------|----------------|--------------|----------|
| {Hospital length of stay=[1,9],BUN=[34.7,204]}                 | {Outcome of<br>Unit=D<br>eath} | 0.10691<br>824 | 0.8360<br>656 | 0.12788<br>260 | 1,282<br>326 | 51       |
| {BUN=[34.7,204],Tracheostomy=False}                            | {Outcome of<br>Unit=D<br>eath} | 0.23270<br>440 | 0.8345<br>865 | 0.27882<br>600 | 1,280<br>057 | 111      |
| {Severe COPD=True,Tracheostomy=False}                          | {Outcome of<br>Unit=D<br>eath} | 0.05241<br>090 | 0.8333<br>333 | 0.06289<br>308 | 1,278<br>135 | 25       |
| {Vasopressors=False,Duration of mechanical ventilation=[4,12]} | {Outcome of<br>Unit=D<br>eath} | 0.08176<br>101 | 0.8297<br>872 | 0.09853<br>249 | 1,272<br>696 | 39       |
| {Age=[69.95],BUN=[34.7,204]}                                   | {Outcome of<br>Unit=D<br>eath} | 0.13207<br>547 | 0.8289<br>474 | 0.15932<br>914 | 1,271<br>408 | 63       |
| {Vasopressors in the first hour=True,Tracheostomy=False}       | {Outcome of<br>Unit=D<br>eath} | 0.23270<br>440 | 0.8283<br>582 | 0.28092<br>243 | 1,270<br>504 | 111      |
| {Hospital length of stay=[1,9],Highest creatinine 1h=[1.28]}   | {Outcome of<br>Unit=D<br>eath} | 0.11111<br>111 | 0.8281<br>250 | 0.13417<br>191 | 1,270<br>147 | 53       |
| {Age=[69.95],Venous Catheter Center=True}                      | {Outcome of<br>Unit=D<br>eath} | 0.24109<br>015 | 0.8273<br>381 | 0.29140<br>461 | 1,268<br>940 | 115      |
| {Vasopressors in the first hour=True,<br>PAM=False}            | {Outcome of<br>Unit=D<br>eath} | 0.05870<br>021 | 0.8235<br>294 | 0.07127<br>883 | 1,263<br>098 | 28       |

**Table 6.** Factors associated with the unit outcome being Death

| Lhs - factors                                                                   | Rhs - outcome                  | Support **     | Trust nce     | Cobert ura     | Lift         | Quantity |
|---------------------------------------------------------------------------------|--------------------------------|----------------|---------------|----------------|--------------|----------|
| {Age=[69.95], Length of hospital stay=[1.9]}                                    | {Outcome of<br>Unit=D<br>eath} | 0.08805<br>031 | 0.8235<br>294 | 0.10691<br>824 | 1,263<br>098 | 42       |
| {Vasopressors in the first hour=True, Duration of mechanical ventilation=[0.4]} | {Outcome of<br>Unit=D<br>eath} | 0.05870<br>021 | 0.8235<br>294 | 0.07127<br>883 | 1,263<br>098 | 28       |
| {Hospital length of stay=[9,18], Bladder catheter delay=True}                   | {Outcome of<br>Unit=D<br>eath} | 0.27044<br>025 | 0.8216<br>561 | 0.32914<br>046 | 1,260<br>225 | 129      |
| {Vasopressors in the first hour=True,BUN=[34.7,204]}                            | {Outcome of<br>Unit=D<br>eath} | 0.15303<br>983 | 0.8202<br>247 | 0.18658<br>281 | 1,258<br>030 | 73       |
| {Acute respiratory failure in the first hour=True,BUN=[34.7,204]}               | {Outcome of<br>Unit=D<br>eath} | 0.08595<br>388 | 0.8200<br>000 | 0.10482<br>180 | 1,257<br>685 | 41       |
| {Hospital length of stay=[1.9], Venous Catheter Center=True}                    | {Outcome of<br>Unit=D<br>eath} | 0.19916<br>143 | 0.8189<br>655 | 0.24318<br>658 | 1,256<br>098 | 95       |
| {Hospital length of stay=[9,18], Duration of mechanical ventilation=[4,12]}     | {Outcome of<br>Unit=D<br>eath} | 0.13207<br>547 | 0.8181<br>818 | 0.16142<br>558 | 1,254<br>896 | 63       |
| {Highest creatinine 1h=[1.28],BUN=[34.7,204]}                                   | {Outcome of<br>Unit=D<br>eath} | 0.20545<br>073 | 0.8166<br>667 | 0.25157<br>233 | 1,252<br>572 | 98       |
| {Duration of mechanical ventilation=[12,60],Tracheostomy=False}                 | {Outcome of<br>Unit=D<br>eath} | 0.16352<br>201 | 0.8125<br>000 | 0.20125<br>786 | 1,246<br>182 | 78       |

**Table 6.** Factors associated with the unit outcome being Death

| Lhs - factors                                                            | Rhs - outcome            | Support **     | Trust nce     | Cobert ura     | Lift         | Quantity |
|--------------------------------------------------------------------------|--------------------------|----------------|---------------|----------------|--------------|----------|
| {BUN=[34.7,204],Non-Invasive Ventilation Failure=False}                  | {Outcome of Unit=D eath} | 0.23480<br>084 | 0.8115<br>942 | 0.28930<br>818 | 1,244<br>792 | 112      |
| {Highest creatinine 1h=[1.28],Tracheostomy=False}                        | {Outcome of Unit=D eath} | 0.23480<br>084 | 0.8115<br>942 | 0.28930<br>818 | 1,244<br>792 | 112      |
| {Hospital length of stay=[1.9],Vasopressors=True deiro}                  | {Outcome of Unit=D eath} | 0.15303<br>983 | 0.8111<br>111 | 0.18867<br>925 | 1,244<br>051 | 73       |
| {Gender=M,Duration of mechanical ventilation=[4,12]}                     | {Outcome of Unit=D eath} | 0.15303<br>983 | 0.8111<br>111 | 0.18867<br>925 | 1,244<br>051 | 73       |
| {Highest creatinine 1h=[1.28],Duration of mechanical ventilation=[4,12]} | {Outcome of Unit=D eath} | 0.09853<br>249 | 0.8103<br>448 | 0.12159<br>329 | 1,242<br>876 | 47       |
| {Non-invasive ventilation in the first hour=False,BUN=[34.7,204]}        | {Outcome of Unit=D eath} | 0.21383<br>648 | 0.8095<br>238 | 0.26415<br>094 | 1,241<br>617 | 102      |
| {Age=[69.95],Uncomplicated diabetes=False}                               | {Outcome of Unit=D eath} | 0.17819<br>706 | 0.8095<br>238 | 0.22012<br>579 | 1,241<br>617 | 85       |
| {BUN=[34.7,204],Central Venous Catheter=True}                            | {Outcome of Unit=D eath} | 0.24737<br>945 | 0.8082<br>192 | 0.30607<br>966 | 1,239<br>616 | 118      |
| {BUN=[34.7,204],MAP Catheter=True}                                       | {Outcome of Unit=D eath} | 0.21174<br>004 | 0.8080<br>000 | 0.26205<br>451 | 1,239<br>280 | 101      |



**Table 6.** Factors associated with the unit outcome being Death

| Lhs - factors                                                         | Rhs - outcome                  | Support<br>**  | Trust<br>nce  | Cobert<br>ura  | Lift         | Quantity |
|-----------------------------------------------------------------------|--------------------------------|----------------|---------------|----------------|--------------|----------|
| {Vasopressors=True, Duration of mechanical ventilation=[0.4]}         | {Outcome of<br>Unit=D<br>eath} | 0.08805<br>031 | 0.8076<br>923 | 0.10901<br>468 | 1,238<br>808 | 42       |
| {Sex=F,BUN=[34.7,204]}                                                | {Outcome of<br>Unit=D<br>eath} | 0.08805<br>031 | 0.8076<br>923 | 0.10901<br>468 | 1,238<br>808 | 42       |
| {Sex=M, Vasopressors in the first hour=True}                          | {Outcome of<br>Unit=D<br>eath} | 0.18238<br>994 | 0.8055<br>556 | 0.22641<br>509 | 1,235<br>531 | 87       |
| {Hospital length of stay=[1,9),<br>Bladder catheter delay=True}       | {Outcome of<br>Unit=D<br>eath} | 0.19916<br>143 | 0.8050<br>847 | 0.24737<br>945 | 1,234<br>808 | 95       |
| {Hospital length of stay=[1,9),<br>Catheter<br>PAM=True}              | {Outcome of<br>Unit=D<br>eath} | 0.15513<br>627 | 0.8043<br>478 | 0.19287<br>212 | 1,233<br>678 | 74       |
| {severe COPD=True,Probe<br>Bladder delay=True}                        | {Outcome of<br>Unit=D<br>eath} | 0.05031<br>447 | 0.8000<br>000 | 0.06289<br>308 | 1,227<br>010 | 24       |
| {Complicated<br>diabetes=True, Vasopressor<br>s=True}                 | {Outcome of<br>Unit=D<br>eath} | 0.05031<br>447 | 0.8000<br>000 | 0.06289<br>308 | 1,227<br>010 | 24       |
| {Arterial hypertension<br>Systemic=True,Complicated<br>Diabetes=True} | {Outcome of<br>Unit=D<br>eath} | 0.05031<br>447 | 0.8000<br>000 | 0.06289<br>308 | 1,227<br>010 | 24       |
| {Complicated<br>diabetes=True, Blood catheter<br>PAM=True}            | {Outcome of<br>Unit=D<br>eath} | 0.05031<br>447 | 0.8000<br>000 | 0.06289<br>308 | 1,227<br>010 | 24       |

**Table 6.** Factors associated with the unit outcome being Death

| Lhs - factors                                        | Rhs - outcome           | Support        | Trust         | Cobertura      | Lift         | Quantity |
|------------------------------------------------------|-------------------------|----------------|---------------|----------------|--------------|----------|
| {Systemic Arterial Hypertension=True,BUN=[34.7,204]} | {Outcome of Unit=Death} | 0.21802<br>935 | 0.8000<br>000 | 0.27253<br>669 | 1,227<br>010 | 104      |
| {Morbid Obesity=False,BUN=[34.7,204]}                | {Outcome of Unit=Death} | 0.22641<br>509 | 0.8000<br>000 | 0.28301<br>887 | 1,227<br>010 | 108      |
| {Age=[69,95], Indwelling Bladder Probe=True}         | {Outcome of Unit=Death} | 0.25157<br>233 | 0.8000<br>000 | 0.31446<br>541 | 1,227<br>010 | 120      |

According to Table 6, the five most important variables for the Random Forest model are time of use of mechanical ventilation, length of stay in hospital, age, BUN and highest 1h creatinine, however, the other variables, albeit on a smaller scale, contribute to explain the outcome.

**Table 6.** Cutoff point adjustment

| Variable                                           | Importance to the model |
|----------------------------------------------------|-------------------------|
| Duration of mechanical ventilation                 | 51.3432130              |
| Length of hospital stay                            | 49.9806679              |
| Age                                                | 19.6635518              |
| BUN                                                | 16.6921254              |
| Highest creatinine 1h                              | 8.0331053               |
| Central Venous Catheter = True                     | 2.8502089               |
| Indwelling bladder catheter = True                 | 2.7456586               |
| Vasopressors True                                  | 2.6986105               |
| Acute respiratory failure in the first hour = True | 2.3566367               |
| Non-Invasive Ventilation Failure = True            | 2.3172256               |
| Sex = M                                            | 2.0974426               |

**Table 6.** Cutoff point adjustment

| Variable                                          | Importance to the model |
|---------------------------------------------------|-------------------------|
| Vasopressors in the first hour = True             | 1.7933790               |
| Uncomplicated diabetes = True                     | 1.4712762               |
| Tracheostomy = True                               | 1.3493668               |
| Hypothyroidism = True                             | 1.3319429               |
| Systemic Arterial Hypertension = True             | 1.2342152               |
| Non-invasive ventilation in the first hour = True | 1.1883745               |
| Morbid Obesity = True                             | 1.0033068               |
| MAP Catheter = True                               | 0.8561862               |
| Transfusion = True                                | 0.8297716               |
| Complicated diabetes = True                       | 0.6667737               |
| Severe COPD = True                                | 0.3312456               |

### Waste analysis

As the residuals are randomized between -3 and 3, the model appears to be well adjusted and without outliers.

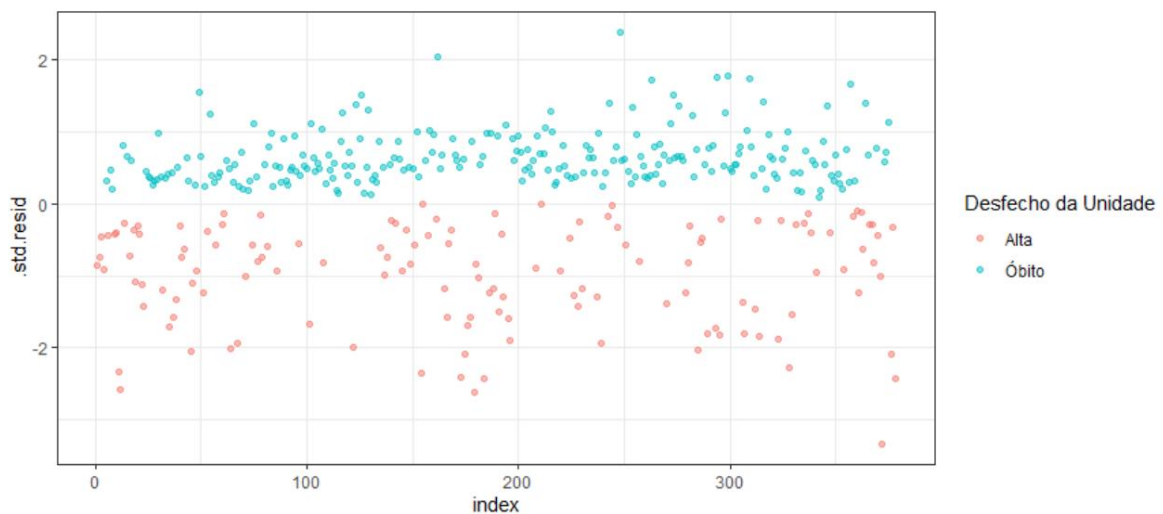

**Figure 2.** Standardized waste

The half-normal graph presented in Figure 1 attests to a good quality of adjustment of the logistic regression model to explain the Unit Outcome variable, since there are no points outside the envelope.

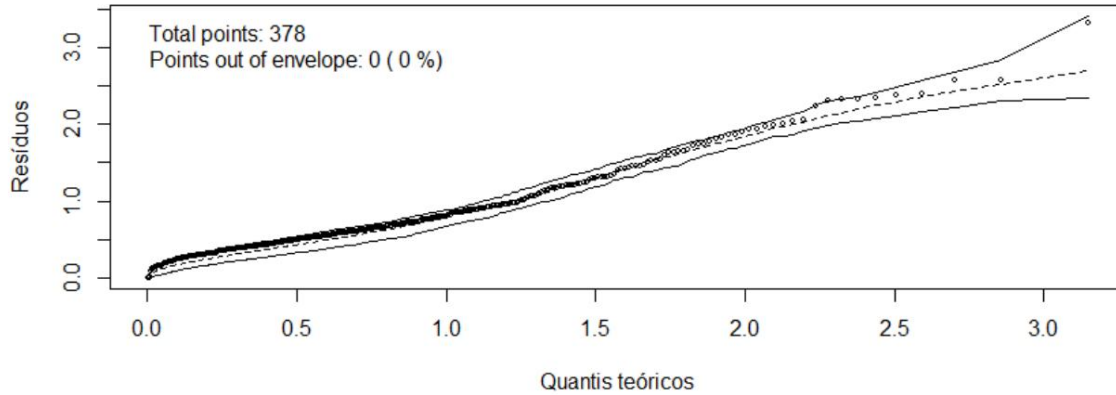

**Figure 3.** Half-normal graph and simulated envelope

## References

- GRAHAM, John W. Missing data analysis: Making it work in the real world. **Annual review of psychology**, v. 60, p. 549-576, 2009.
- KUHN, Max. The caret package. **Journal of Statistical Software**, vol. 28, no. 5, 2009.
- MEEYAI, Sutthipong. Logistic Regression with Missing Data: A Comparison of Handling Methods, and Effects of Percent Missing Values. **Journal of Traffic and Logistics Engineering**, vol. 4, no. 2, 2016.
- MIDI, Habshah; SARKAR, Saroje Kumar; RANA, Sohel. Collinearity diagnostics of binary logistic regression model. **Journal of Interdisciplinary Mathematics**, vol. 13, no. 3, p. 253-267, 2010.
- MORAL, Rafael A.; HINDE, John; DEMÉTRIO, Clarice GB. Half-normal plots and overdispersed models in R: the hnp package. **Journal of Statistical Software**, vol. 81, no. 1, p. 1-23, 2017.
- PEDERSEN, Alma B. et al. Missing data and multiple imputation in clinical epidemiological research. **Clinical epidemiology**, vol. 9, p. 157, 2017.

PEPINSKY, Thomas B. A note on listwise deletion versus multiple imputation. **Political Analysis**, vol. 26, no. 4, p. 480-488, 2018.

SALMERÓN, Román; GARCÍA, CB; GARCÍA, J. Variance inflation factor and condition number in multiple linear regression. **Journal of Statistical Computation and Simulation**, v. 88, no. 12, p. 2365-2384, 2018.

TEAM, R. Core et al. **A: A language and environment for statistical computing**. 2013.

ZAWADZKI, Zygmunt; KOSINSKI, Marcin. **FSelectorRcpp: "Rcpp" Implementation of "FSelector" Entropy-Based Feature Selection Algorithms with a Sparse Matrix Support**. 2019. URL <https://CRAN.R-project.org/package=FSelectorRcpp>. R package version 0.3, v. 1, 2019.
